# Supplementary material for: Regulon-Specific Control of Transcription Elongation across the Yeast Genome
Source: PLoS Genet. 2009 Aug 21;5(8):e1000614. doi: 10.1371/journal.pgen.1000614 (PMC2721418; doi:10.1371/journal.pgen.1000614)
Supplement: Table S1 — Excel file containing all the normalized and processed data. (5.92 MB XLS) [file pgen.1000614.s010.xls]

## Sheet: Table_S1
Sistematic name	Gene name	TR Control (before doxycycline)	TR 5h doxycycline	TR 7h doxycycline	Log2 ChIP SPT16	Log2 ChIP RPB1-Myc Glucose	Log2 ChIP 8WG16 Glucose	Log2 ChIP Ser5P Glucose	Log2 ChIP 8WG16 2 h Galactose	Log2 ChIP 8WG16 14.5 h Galactose	zLog2 ChIP SPT16	zLog2 ChIP RPB1-Myc Glucose	zLog2 ChIP 8WG16 Glucose	zLog2 ChIP Ser5P Glucose	zLog2 ChIP 8WG16 2 h Galactose	zLog2 ChIP 8WG16 14.5 h Galactose	zLog2 TR compendium Glucose (Pelechano et al. submited)	zlog2 TR Glucose (Garcia-Martinez et al. 2004)	zlog2 TR 2h Galactose (Garcia-Martinez et al. 2004)	zlog2 TR 14.5h Galactose (Garcia-Martinez et al. 2004)	Log2 ChIP 8WG16 RAP1 (wt)	Log2 ChIP 8WG16 rap1-sil	Log2 ChIP 8WG16 Δtpk1	Log2 ChIP 8WG16 Δtpk2	zLog2 ChIP 8WG16 RAP1 (wt)	zLog2 ChIP 8WG16 rap1-sil	zLog2 ChIP 8WG16 Δtpk1	zLog2 ChIP 8WG16 Δtpk2	Log2 TR RAP1 (wt)	Log2 TR rap1-sil	Log2 TR Δtpk1	Log2 TR Δtpk2	zLog2 TR RAP1 (wt)	zLog2 TR rap1-sil	zLog2 TR Δtpk1	zLog2 TR Δtpk2	zLog2 (ChIP SPT16 / TR)	Glucose zLog2 (ChIP RPB1-Myc / TR)	Glucose zLog2 (ChIP 8WG16 / TR)	Glucose zLog2 (ChIP Ser5P / TR)	2h Galactose zLog2 (ChIP 8WG16 / TR)	14.5h Galactose zLog2 (ChIP 8WG16 / TR)	RAP1 (wt)zLog2 (ChIP 8WG16 / TR)	rap1-sil zLog2 (ChIP 8WG16 / TR)	Δtpk1 zLog2 (ChIP 8WG16/ TR)	Δtpk2 zLog2 (ChIP 8WG16/ TR)	[14.5h Galactose/ Glucose] zLog2 (ChIP 8WG16 / TR)	[2h Galactose/ Glucose] zLog2 (ChIP 8WG16 / TR)	[2h Galactose/ 14.5h Galactose] zLog2 (ChIP 8WG16 / TR)
YAL001C	TFC3	213.415	145.068	119.44	-0.314599	0.0316311	-0.0644628	-0.532454	0.511319	0.503048	-0.71255	-0.0639556	-0.338641	-1.07398	0.567298	0.556852	-0.355507	-0.696519	-0.0654465	-0.275756	-0.923026	-0.621725	-0.734396	0.279619	-1.51582	-1.13474	-0.977409	0.0681773	-0.694723	-1.02895	-0.38758	0.0209937	-0.448685	-0.61782	-0.138898	0.236632	-0.357044	0.291551	0.0168657	-0.718468	0.632744	0.832608	0.592797	0.513016	-0.838511	0.211442	0.815742	0.615879	0.815742
YAL002W	VPS8	117.853	82.1624	61.2988	-1.30991	-0.0824975	0.555229		0.142895	0.181104	-2.10815	-0.213753	0.422053		-0.0381537	0.0669017	-0.921224	-0.591234	-1.06054	-0.496589	-1.07921	-0.539757	-0.997322		-1.72221	-1.01462	-1.28183		-1.47421		-1.08059	-0.628647	-1.12898		-0.79342	-0.340239	-1.18693	0.707471	1.34328		1.02238	0.56349	0.642998	0.474863	-0.488413		-0.779787	-0.320895	-0.779787
YAL003W	EFB1	605.173	440.05	290.398	1.85447	1.73167	2.8091	1.98671	1.65496	1.46381	2.32887	2.1674	3.18877	3.2607	2.44671	2.01898	3.47179	2.54559	1.39241	1.9597	2.83375	2.6304	2.29015	2.68191	3.44849	3.63115	2.5245	3.13535	3.20249	2.58386	2.31863	3.41301	2.95263	2.68748	2.41702	3.24869	-1.14292	-1.30439	-0.28302	-0.211091	1.0543	0.0592834	-0.614746	-1.00074	0.10748	-0.45344	0.342304	1.33732	0.342304
YAL004W		167.917	119.391	112.008	2.57701	2.10098	2.0062	1.74107	2.19596	2.04057	3.342	2.65213	2.20317	2.83803	3.33577	2.89673	1.89414	2.02226	2.02644	1.4098	2.08495	1.40383	1.81104	2.24482	2.45901	1.83365	1.96978	2.57728	2.29133	2.07014	0.757658		2.1574	2.21748	0.942738		1.44786	0.757996	0.309034	0.94389	1.30934	1.48693	-0.37406	-0.429815	1.02704	-0.332465	1.17789	1.0003	1.17789
YAL005C	SSA1	1082.91	827.682	542.876	2.00915	2.17271	1.9672	1.54808	2.30261	2.06184	2.54576	2.74629	2.1553	2.50596	3.51103	2.9291	2.9614	1.83954	1.68417	1.3768	2.17919	1.34209	1.6893	2.03999	2.58354	1.74317	1.82883	2.31577	2.88221	3.43504	1.53063	2.38667	2.6731	3.46621	1.67279	2.33732	-0.415644	-0.215113	-0.806103	-0.45544	1.82685	1.5523	-0.404351	-0.401078	0.156041	-0.275775	2.3584	2.63296	2.3584
YAL007C	ERP2	89.6168	59.0314	45.2123	-0.25656	0.563913	-0.9874	0.281234	-0.245518	-0.0788095	-0.631168	0.634683	-1.47158	0.326123	-0.676457	-0.328647	-0.926629	0.46749	-0.00659767	0.244286	0.277004	0.0789621	-0.873321	-0.130022	0.0699341	-0.107907	-1.13826	-0.45484	-0.697818	-0.83728	-0.795803	-1.11918	-0.451386	-0.442468	-0.52445	-0.775828	0.29546	1.56131	-0.544952	1.25275	-0.669859	-0.572933	0.20707	0.186869	-0.613811	0.324818	-0.0279809	-0.124907	-0.0279809
YAL008W	FUN14	67.6587	33.6208	27.4613	-0.760302	-1.10279	-0.461341	-0.552013	-0.523954	0.45137	-1.3375	-1.55292	-0.825824	-1.10763	-1.13403	0.478206	-1.5371	-0.11284	0.55416	-0.055879	-0.518077	-0.628509	-0.0498798	-0.788727	-0.980711	-1.14468	-0.184854	-1.29585	-1.61433	-1.55935		-1.99436	-1.25128	-1.10308		-1.55298	0.199596	-0.0158237	0.711276	0.429471	-1.68819	0.534085	0.462634	0.516174		0.507128	-0.177191	-2.39946	-0.177191
YAL009W	SPO7	104.712	74.8931	33.1694	-0.733805	0.23094	0.0486121	-0.115321	-0.287089	-0.139972	-1.30035	0.197644	-0.199837	-0.356222	-0.744772	-0.421727		0.494877	0.0393261	-0.348813	-1.05858	-0.87201	-0.669318		-1.69495	-1.50153	-0.90206		-1.5454	-1.28327	-1.49029	-1.35212	-1.19112	-0.850499	-1.18037	-0.982673					-0.784098	-0.0729138	0.63637	0.629516	0.278311
YAL010C	MDM10	84.4624	56.0895	45.4006	-0.921649	-0.557169	-0.512723	-0.682502	0.0910919	0.0985515	-1.56374	-0.836776	-0.888897	-1.33216	-0.123285	-0.0587305		-1.09408			-0.938351	-1.24897			-1.53607	-2.05394																	0.597723	0.804977
YAL011W	SWC3	125.459	91.8379	54.6773	-0.683375	-0.431367	0.121114	-0.170923	0.00732145	-0.613658	-1.22964	-0.671656	-0.110838	-0.451895	-0.26095	-1.1426	-0.145493	-1.12946	-0.765768	-0.831257	0.0571819	0.19111	-0.227879	0.00430669	-0.220546	0.0564422	-0.390947	-0.283333	-0.368446	-0.40214	-0.908404	0.16716	-0.163926	-0.0443653	-0.630799	0.366425	-1.08415	-0.526163	0.0346545	-0.306402	0.504817	-0.311348	0.277728	0.134668	0.239851	0.28764	-0.346003	0.470163	-0.346003
YAL012W	CYS3	94.7391	80.2178	50.4297	1.05965	0.933171	0.799714	1.98327	0.971222	0.0751887	1.21439	1.11935	0.722168	3.25478	1.32308	-0.0942851		0.602377	0.59061	0.697974	0.479595	0.660153	1.10733	1.63342	0.337643	0.74381	1.155	1.79667	-0.540895	-1.02884	0.848165	-0.0887725	-0.314431	-0.617726	1.02822	0.139161					0.732475	-0.792259	0.141951	-0.0836568	0.126778	-0.16325
YAL013W	DEP1	155.464	129.37	72.8882	-0.469761	0.112831	-0.120771	-0.20623	0.0483787	-0.261909	-0.930114	0.042622	-0.407762	-0.512647	-0.193479	-0.607295	0.93387	0.50139	-0.146835	0.294394	-0.186797	-0.309898	-0.187884	0.429632	-0.542947	-0.677769	-0.34464	0.259709	0.767736	0.657669	0.92381		0.827683	0.925237	1.09966		-1.86398	-0.891248	-1.34163	-1.44652	-0.0466439	-0.90169	0.35615	0.367871	-1.4443	0.169923	0.439942	1.29499	0.439942
YAL014C	SYN8	184.515	162.602	128.272	0.661896	1.24862	-0.643886	-0.226396	-0.259399	0.400816	0.656667	1.53338	-1.0499	-0.547347	-0.699268	0.40127	0.464698	1.33178	0.868797	0.739809	-0.329832	0.148675	0.0190881	0.425266	-0.731958	-0.00574516	-0.105001	0.254134	0.5839	0.0735704		0.562105	0.667239	0.390854		0.717131	0.191969	1.06868	-1.5146	-1.01204	-1.56807	-0.338539	0.402126	0.15442		0.171131	1.17606	-0.0534631	1.17606
YAL015C	NTG1	137.37	41.7101	68.9744	0.0471923	-0.649812	-0.647738				-0.205255	-0.958373	-1.05463					1.24991	1.55423	1.20704		0.104807	-0.505714			-0.0700319	-0.712634				-0.646324				-0.383273									0.174839	-0.329361
YAL016C-A
YAL016C-B
YAL016W	TPD3	299.321	176.446	105.444	-0.604047	0.992618	0.496214	0.0713175	0.772101	0.46114	-1.11841	1.19737	0.34961	-0.0350762	0.995858	0.493073	0.551959	0.355694	0.249822	0.0803279	0.268067	0.505497	0.238621	0.426446	0.0581237	0.517166	0.149181	0.255641	0.67565	0.425897	0.334167		0.747314	0.713192	0.542765		-1.67037	0.645413	-0.202349	-0.587035	0.746036	0.412745	0.209943	-0.0116692	-0.393585	0.170805	0.615094	0.948384	0.615094
YAL017W	PSK1	184.141	111.185	82.145	-0.668479	0.0579536	-0.451459	-0.524867	0.872748	0.0375295	-1.20875	-0.0294065	-0.813693	-1.06092	1.16126	-0.151597	-0.762324	-0.993673	-0.206976	-0.186969	-0.502807	-0.599286	-1.03031	-1.57772	-0.960533	-1.10186	-1.32003	-2.30322	-1.18831	-1.71072	-0.820026	-0.657669	-0.879469	-1.24156	-0.547329	-0.366011	-0.446427	0.732918	-0.0513686	-0.298596	1.36823	0.0353719	0.457726	0.502572	-0.772702	0.725498	0.0867405	1.4196	0.0867405
YAL018C		25.0654	8.75152	9.78823				-0.48381						-0.990274				-2.8659	-1.04694			-1.42477				-2.31158																		0.886808
YAL019W	FUN30	339.41	250.223	172.255	-0.430639	-0.158005	0.452743	-0.0849103	-0.339442	-0.463013	-0.875258	-0.31286	0.296248	-0.303895	-0.830808	-0.913346	0.186226	-0.44101	-1.00931	-0.511524	-0.202476	0.497683	-0.818567	-1.00484	-0.563666	0.505715	-1.07486	-1.57178	0.714676	0.259761	0.575471	0.860367	0.781374	0.561197	0.770668	0.981984	-1.06148	-0.499086	0.110022	-0.490121	0.178505	-0.401821	0.36119	-0.00803195	-1.84553	0.56694	-0.511843	0.0684835	-0.511843
YAL019W-A
YAL020C	ATS1	78.5095	51.5512	33.2758	0.862218	0.496124	0.0345604	-0.216627	-0.372561	-0.123925	0.937554	0.545707	-0.217086	-0.530536	-0.885233	-0.397306	-0.253725	0.528601	-0.0193803	-0.108601	-0.0722488	-0.634116	-0.157073	0.0501063	-0.39158	-1.1529	-0.308967	-0.224858	-0.676773	-1.11491	-0.236507	-0.188114	-0.43302	-0.696464	0.00378456	0.0509473	1.19128	0.799432	0.0366386	-0.276811	-0.865852	-0.288705	0.319331	0.518784	-0.312751	0.274964	-0.325344	-0.902491	-0.325344
YAL021C	CCR4	165.926	111.605	76.1225	0.227025	-0.361195	-0.164213	-0.162208	0.474842	-0.0803634	0.0469019	-0.579553	-0.461089	-0.4369	0.507354	-0.331012	0.766918	-0.109535	-0.401252	-0.748571	0.309963	0.147563	-0.346558	0.176071	0.113486	-0.00737494	-0.528358	-0.0640293	0.202128	0.00557825	-0.728613		0.334045	0.328649	-0.460992		-0.720016	-1.34647	-1.22801	-1.20382	0.908606	0.417559	0.196476	0.154938	-0.0673668	0.240101	1.64557	2.13661	1.64557
YAL022C	FUN26	120.18	86.1177	56.9421	0.193805		0.654319				0.000320888		0.54369					0.101822	0.747591	-0.60714	-0.0520504	-0.154596	-0.317553	-0.405928	-0.364889	-0.450179	-0.494775	-0.807108			-1.00605				-0.723018								0.312838	0.295583	0.228242	0.40118
YAL023C	PMT2	151.247	113.235	53.4506	1.05697	0.359264	0.414829	0.137475	0.470465	0.0621667	1.21064	0.366074	0.249708	0.0787602	0.500161	-0.114103	1.17719	0.672046	0.0136425	-0.437332	0.927223	0.688752	0.424812	0.803364	0.929153	0.78572	0.364759	0.736879	0.850403	0.253422	0.259174	0.745934	0.89983	0.555398	0.471938	0.880368	0.0334436	-0.811119	-0.927485	-1.09843	0.486518	0.32323	-0.00193025	-0.0969684	-0.107179	0.0664853	1.25072	1.414	1.25072
YAL024C	LTE1	181.198	147.78	103.649	-0.163711	0.0363813	-0.324584	-0.260718	0.462316	-0.568504	-0.500979	-0.0577208	-0.65795	-0.606403	0.486769	-1.07389	-0.480601	-0.936901	-1.07949	-0.957315	-0.289974	0.00400062	-0.309449	-0.443347	-0.679288	-0.217761	-0.485392	-0.854884	-0.488878	-0.96372	-0.248113	-0.269157	-0.269033	-0.558146	-0.00717734	-0.0210175	-0.020378	0.42288	-0.177349	-0.125803	1.56626	-0.116571	0.389314	0.221761	-0.478215	0.411537	0.0607777	1.74361	0.0607777
YAL025C	MAK16	197.153	149.324	95.2692	1.18906	0.03396	0.665345				1.39585	-0.0608988	0.557225					0.214926	-0.872496	0.142048	1.10707	0.839136	0.537211	0.966438	1.16681	1.0061	0.494898	0.945086		0.351896	0.173186	1.51168		0.64549	0.390725	1.56034							-0.0597386	-0.166968	0.104173	0.0213515
YAL026C	DRS2	69.0252	36.5317	43.1004	0.137094	0.736254	1.54615				-0.0791967	0.860885	1.63845
YAL026C-A
YAL027W		124.161	70.5626	43.7184	-0.496409	-0.0631727	-0.217176	-0.242782	0.116133	-0.131319	-0.967479	-0.188389	-0.526102	-0.575541	-0.0821347	-0.408558	-0.673926	-0.173763	-1.01692	-0.250069	-0.730951	-0.270691	-0.754813	-0.44889	-1.26201	-0.620312	-1.00105	-0.861962	-0.300467	-0.482915	-1.58252	-0.345824	-0.104597	-0.118266	-1.26747	-0.0890968	-0.293553	0.485537	0.147824	0.0983854	0.934787	-0.158489	0.531058	0.349621	0.266425	0.413071	-0.306314	0.786963	-0.306314
YAL028W	FRT2	105.428	70.0143	52.8704	-0.31854	-0.489104	-0.428351	-0.312564	-0.297777	-0.164233	-0.718076	-0.747438	-0.785328	-0.695613	-0.762336	-0.458648					-0.0245411	0.123843	-1.10897	-0.482547	-0.328537	-0.0421359	-1.41111	-0.904934	-0.550819		-1.67291	-0.560959	-0.323092		-1.35285	-0.280133							0.303996	0.165979	-0.0582619	0.422386
YAL029C	MYO4	185.046	119.161	78.1357	-0.893215	-0.0887999	-0.268377	1.18493	0.364684	-0.149142	-1.52387	-0.222025	-0.588954	1.8811	0.326324	-0.435682	-0.570735	-0.847323	-1.91198	-0.351088	-0.218669	0.200443	0.392703	-0.234544	-0.585064	0.0701197	0.327582	-0.588291	-1.21563	-0.740547	-0.376248	-0.616453	-0.903308	-0.353969	-0.128196	-0.329411	-0.953136	0.34871	-0.0182189	2.45184	2.2383	-0.0845938	0.366395	0.130323	0.455778	0.353747	-0.066375	2.25652	-0.066375
YAL030W	SNC1	343.84	213.366	111.759	-0.380382	-0.404975	0.0218057	0.23371	0.0217163	0.465267	-0.804789	-0.637015	-0.232743	0.24435	-0.237294	0.499355	-0.312501	0.729926	0.713666	0.882883	0.592345	0.419516	-0.0425935	0.0356785	0.486636	0.391164	-0.176418	-0.243279	0.354716	0.703482	-0.733965	-0.391053	0.467218	0.96715	-0.466047	-0.129259	-0.492288	-0.324514	0.0797578	0.556851	-0.95096	-0.383528	0.10571	0.0283522	0.289629	0.278957	-0.463286	-1.03072	-0.463286
YAL031C	GIP4	138.514	79.7199	53.5287	-0.30679	-0.707479	-0.247561	-0.146602	0.224066	0.0966451	-0.7016	-1.03406	-0.563401	-0.410047	0.0952386	-0.0616319	-0.355039	-0.70002	-1.16702	-1.08701	-0.381661	-0.508531	-0.556643	-0.413206	-0.800446	-0.968859	-0.771601	-0.816401	-0.532238	-1.02996	-1.24076		-0.306875	-0.618752	-0.944695		-0.346561	-0.679023	-0.208361	-0.0550075	1.26226	1.02537	0.418785	0.460328	0.173095	0.403195	1.23373	1.47062	1.23373
YAL031W-A
YAL032C	PRP45	94.2286		49.6149	0.715392	0.918364	1.73153	1.16561			0.731678	1.09991	1.866	1.84785							1.18817	1.08822	0.279615	1.10202	1.27398	1.37112	0.196645	1.1182			-0.0243661				0.204144								-0.0858079	-0.282906	-0.00749926	-0.016174
YAL033W	POP5	235.625	179.859	97.8258	1.10165	0.71272	0.715485	0.120727	0.110764	-0.143621	1.27328	0.829997	0.618774	0.0499414	-0.0909572	-0.42728	-0.264495	1.29045	0.71726	0.639885	0.436768	0.155621	-0.716265	0.308408	0.281051	0.00443496	-0.956416	0.104934	-0.468005	-0.404767	-1.03471	-0.102167	-0.250816	-0.0467693	-0.750093	0.127267	1.53778	1.09449	0.883268	0.314436	-0.808217	-1.06716	0.155717	0.151187	-0.206323	0.203474	-1.95043	-1.69149	-1.95043
YAL034C	FUN19	297.494	205.881	154.489	0.0143616	-0.838726	-0.0458473	0.251879	0.793436	0.594049	-0.25129	-1.20633	-0.31579	0.275612	1.03092	0.69534	-0.0272418	-0.323906	0.0587822	-0.543623	-0.202894	-0.396197	-0.404122	0.0195333	-0.564218	-0.804237	-0.595007	-0.263892	-1.28773		-1.54071	-1.36585	-0.966239		-1.22799	-0.99486	-0.224048	-1.17909	-0.288548	0.302854	0.972137	1.23896	0.361324	0.40804	0.632978	0.283426	1.52751	1.26068	1.52751
YAL034C-B
YAL034W-A	MTW1	99.0272	87.3393	61.2985	0.55568	0.183705	0.00356166	-0.0997854	0.668915	0.78423	0.507733	0.135646	-0.255139	-0.32949	0.826286	0.984767	0.947848	-0.0854018	0.357048	0.161602	0.608094	0.773054	0.35578	0.993476	0.507446	0.909263	0.284831	0.979608	-0.189288	-0.396957	-0.358235	0.572431	-0.00756492	-0.0396235	-0.111184	0.726301	-0.440115	-0.812202	-1.20299	-1.27734	0.469238	0.823165	0.100648	-0.136209	0.396015	0.013868	2.02615	1.67222	2.02615
YAL035W	FUN12	281.843	242.868	125.638	-0.108485	0.590651	0.723767	0.352007	0.864327	0.336825	-0.423541	0.669777	0.62894	0.447901	1.14742	0.303885	0.966802	-0.352582	-0.650242	0.209209	0.900762	1.26904	1.02031	0.770214	0.894187	1.63611	1.05424	0.694554	1.12218	1.2145	0.61366	1.34459	1.13702	1.43467	0.806737	1.41197	-1.39034	-0.297025	-0.337862	-0.518902	1.79766	0.0946759	0.00657516	-0.367074	0.247507	0.0756601	0.432538	2.13552	0.432538
YAL036C	RBG1	93.3714	80.7602	40.0788	0.390946	0.421836	0.559883	0.290816	0.112522	-0.666925	0.276748	0.448201	0.427766	0.342611	-0.088068	-1.22367	-0.178011	0.284856	-0.156741	0.378045	0.958762	0.65445	0.831988	0.688252	0.970829	0.735451	0.8362	0.589907	-1.91519	-1.7519	-0.016453	-0.317799	-1.51385	-1.27924	0.211618	-0.0642106	0.454759	0.626212	0.605777	0.520622	0.0686734	-1.60171	-0.0120677	-0.0810019	0.624582	0.0983448	-2.20749	-0.537103	-2.20749
YAL037C-A
YAL037C-B		359.682	248.872	128.189	2.17628	2.33771	2.7356	1.90033	2.76269	2.16524	2.7801	2.96285	3.09854	3.11208	4.26712	3.08646		1.96803	2.50376	2.3346	2.9269	2.2567	2.94439	2.74162	3.57159	3.0835	3.28201	3.21158	2.77938	2.6288	3.39706	3.1539	2.58335	2.72859	3.43556	3.0186					1.76336	0.751856	-0.644688	-0.826799	-0.153551	-0.469964
YAL037W		128.847	124.35	44.4824	0.137243	0.391374	0.143781	-0.58194	-0.989914	-0.563512	-0.0789888	0.408219	-0.0830146	-1.15912	-1.89977	-1.06629	-1.96108	-0.527703	-0.795726	-0.338476	-0.555843	-0.434275	-1.32922	-1.24095	-1.03062	-0.86004	-1.66612	-1.87324	-1.20362	0.313757	-1.68762	-2.40892	-0.892826	0.610597	-1.36674	-1.92109	1.88209	2.3693	1.87806	0.801953	-1.10404	-0.727814	0.474773	0.425765	-0.299379	0.632289	-2.60588	-2.9821	-2.60588
YAL038W	CDC19	159.536	69.0689	47.2501	2.37094	2.49639	2.65328	2.92756	2.57982	2.19859	3.05304	3.17112	2.99748	4.8796	3.96658	3.13721		1.05735	1.81316	1.58763	2.57167	2.26656	2.92963	2.90969	3.10217	3.09794	3.26491	3.42618	1.82755	1.08711	2.64411	2.10561	1.75264	1.31812	2.72442	2.08774					2.15342	1.54958	-0.530505	-0.831386	0.540486	-0.516482
YAL039C	CYC3	218.899	155.592	99.1028	-0.240419	-0.150336	0.585749	-0.382424	0.652364	0.237128	-0.608537	-0.302794	0.459517	-0.81582	0.799086	0.152161		1.08283	1.57087	1.01309	0.675305	0.285447	-0.33156	0.424157	0.596261	0.19469	-0.510993	0.252719	0.583264	0.612449	-0.68079		0.666684	0.883865	-0.415825						-0.771786	-0.860932	0.0790439	0.090757	-0.0951682	0.171438
YAL040C	CLN3	122.714	71.2969	34.0556	0.612573	1.25796	1.32176	0.83125	1.19868	1.32872	0.587507	1.54564	1.363	1.27253	1.69689	1.8134	0.35873	0.0619233	-0.502007	0.0888102	1.67604	1.42008	0.97157	1.17652	1.91866	1.85746	0.997813	1.21331	1.45295	0.79941	0.77163	0.0365417	1.42571	1.05491	0.955934	0.250439	0.228777	1.18691	1.00427	0.913796	2.19889	1.72459	-0.242622	-0.437379	0.0418794	-0.036793	0.720328	1.19463	0.720328
YAL041W	CDC24	123.608	90.7212	48.4937	0.268303	0.173018	0.932683	0.239047	0.869828	0.258266	0.104781	0.12162	0.885392	0.253533	1.15646	0.18433	0.124744	-0.679255	-0.959761	-1.05275	0.242029	0.300041	0.499485	1.05064	0.023717	0.216077	0.451217	1.05259	-0.233723	-0.631275	-0.196545		-0.0463451	-0.253997	0.0415269		-0.0199625	-0.00312388	0.760649	0.128789	2.11622	1.23708	0.218312	0.0839638	0.409691	-0.00195218	0.476434	1.35557	0.476434
YAL042C-A
YAL042W	ERV46	239.486	168.617	104.272	0.800342	0.2628	0.571555	0.0905262	0.354789	0.148614	0.850792	0.239461	0.442094	-0.00202414	0.310064	0.0174575	0.885739	0.880019	0.493473	0.499462	0.502182	0.394701	0.2249	0.0990218	0.36749	0.354799	0.133295	-0.162404	0.16801	0.119656	0.269728	0.666456	0.304269	0.433017	0.481905	0.809793	-0.0349467	-0.646278	-0.443645	-0.887763	-0.183409	-0.482005	0.134691	0.0399025	-0.34861	0.261426	-0.0383591	0.260236	-0.0383591
YAL043C	PTA1	159.248	121.079	81.546	0.436267	-0.221473	0.166455	-0.0115472	0.0672099	0.164793	0.340295	-0.396163	-0.0551812	-0.17766	-0.162532	0.0420786		0.0999202	-0.639903	-0.499107	0.191864	0.678132	0.224212	0.0457377	-0.0425731	0.770157	0.132498	-0.230436	-0.0881188	-0.0354278	-0.556774		0.0807313	0.291133	-0.298696						0.477371	0.541185	0.234437	-0.0920253	0.431194	0.276173
YAL044C	GCV3	261.695	100.492	86.781	0.815977	-0.0642109	-0.0282152	-0.0788474	0.977843	0.18391	0.872715	-0.189751	-0.294146	-0.293462	1.33397	0.0711714	0.0615663	2.0253	1.69195	1.21615	0.56336	1.02854	0.916942	0.260615	0.448333	1.28367	0.934562	0.0439133	-0.163085	0.179591	0.192334	0.796456	0.0153041	0.48785	0.408809	0.925231	0.811149	-0.251318	-0.355712	-0.355029	-0.357982	-1.14498	0.115027	-0.25513	0.525753	0.216702	-0.789263	-0.00226971	-0.789263
YAL044W-A		153.64	110.026	57.7635	-0.302054	0.0948938	0.34545	-0.304935	0.3546	0.519853	-0.69496	0.0190788	0.164542	-0.682487	0.309753	0.582426		1.98881	2.23376	1.51152	0.45063	0.859598	0.149853	-0.812121	0.299369	1.03609	0.046403	-1.32572													-1.924	-0.929097	0.151261	-0.176492		0.513602
YAL045C		167.493	92.0246	42.8813	-0.197439	0.489664	-0.260918	-0.200682	0.945649	0.550755	-0.548271	0.537228	-0.579797	-0.5031	1.28106	0.629454	0.178075	2.09291	2.08329	1.38579	0.441463	0.889439	0.0351057	-0.344733	0.287254	1.07982	-0.0864556	-0.728976		-0.583745	-0.181702	0.143389		-0.210513	0.0555462	0.345317	-0.726346	0.359153	-0.757873	-0.681176	-0.802233	-0.756335	0.154208	-0.190382	-0.142002	0.384243	0.00153776	-0.0443601	0.00153776
YAL046C		161.307	120.138	80.6491	-0.642632	-1.11279	-0.589968	-0.0589307	-0.575124	-0.276241	-1.17251	-1.56604	-0.983718	-0.259192	-1.21812	-0.629107	0.580688	2.08275	1.59844	1.30535	0.570797	0.0340883	-0.219496	-0.549648	0.458161	-0.173668	-0.381242	-0.990606	0.0617804	-0.404613		0.474949	0.211557	-0.0466278		0.639738	-1.7532	-2.14673	-1.56441	-0.83988	-2.81655	-1.93446	0.112636	0.207756		0.440958	-0.370052	-1.25215	-0.370052
YAL047C	SPC72	72.1175	54.848	31.0581	-1.30285	-0.22704	-0.653488	-0.423196	0.0401124	-0.60748	-2.09824	-0.40347	-1.06169	-0.885975	-0.207063	-1.1332	-1.19497	-1.09585	-1.5434	-1.48379	-0.678546	-0.735013	-1.1279	-0.0317886	-1.19276	-1.30076	-1.43302	-0.329419	-1.69325	-1.88534	-0.901874	-1.3945	-1.32015	-1.40132	-0.624631	-1.02031	-0.903271	0.791503	0.133282	0.308998	1.33634	0.350584	0.514213	0.565748	-0.808388	0.29763	0.217302	1.20306	0.217302
YAL047W-A		90.1175	56.9192	38.3489	-1.77083	-0.908637	-0.191817		-0.553104	-0.129203	-2.75444	-1.29809	-0.494973		-1.18193	-0.405338		0.465464	0.768331	0.242107	0.0500575		-0.373704		-0.22996		-0.559789				-1.45174				-1.14396						-1.95026	-0.647445	0.280018		0.584174
YAL048C	GEM1	100.628	67.0636	43.934	0.445972	-0.124242	-0.46758	-0.619289	-0.287076	-0.246814	0.353903	-0.268544	-0.833482	-1.22339	-0.744751	-0.584323	-0.707172	-0.332542	-0.414462	-0.717169	-0.214473	-0.102557	-1.21853	-0.733441	-0.579519	-0.373917	-1.53796	-1.22527	-0.428954	-0.491195	-1.06571		-0.216734	-0.125841	-0.779367		1.06108	0.438628	-0.12631	-0.516218	-0.330289	0.132846	0.365046	0.27136	-0.75859	0.491826	0.259156	-0.203979	0.259156
YAL049C		264.614	164.009	97.9466	-0.5546	-0.192731	-0.299042	-0.529394	0.553738	0.252062	-1.04907	-0.358438	-0.626596	-1.06871	0.637009	0.174889	-0.122325	0.755762	0.735862	0.791622	0.194783	0.0252181	-0.538689	-0.288675	-0.0387156	-0.186667	-0.750814	-0.657403	0.469472	0.560253	-1.27582	-0.00358206	0.567371	0.836112	-0.97781	0.214809	-0.926748	-0.236113	-0.504271	-0.946383	-0.0988532	-0.616733	0.233499	0.211885	0.226996	0.368728	-0.112462	0.405418	-0.112462
YAL051W	OAF1	109.17	69.2017	40.412	-0.562138	-0.347177	0.137754	-0.7602	0.394207	-0.0845926	-1.05964	-0.561154	-0.090412	-1.46585	0.374842	-0.337448	-1.43938	-1.04325	-1.09567	-0.45932	0.0137356	-0.228711	-0.38568	-0.440412	-0.277957	-0.558792	-0.573655	-0.851137	-1.20185	-1.01284	-1.01461	-1.19437	-0.891282	-0.603089	-0.731106	-0.842593	0.379738	0.878226	1.34897	-0.0264714	1.47051	0.121872	0.291693	0.330081	0.157451	0.410725	-1.2271	0.121542	-1.2271
YAL053W	FLC2	237.673	131.114	58.4746	-0.12596	-0.104835	0.124989	-0.288991	-0.0642264	-0.00674091	-0.448045	-0.243072	-0.106082	-0.655053	-0.378529	-0.218969	-0.276458	-0.132418	-0.386006	-0.086889	0.125264	0.406517	-0.521257	-0.1933	-0.130581	0.372114	-0.73063	-0.535631	1.12168	0.0181992	-0.246795	-0.779994	1.13659	0.340196	-0.0059322	-0.474633	-0.171587	0.033386	0.170376	-0.378595	0.00747733	-0.13208	0.255844	0.0344029	-0.724697	0.342332	-0.302456	-0.162899	-0.302456
YAL054C	ACS1	190.705	114.71	90.1003	-0.402902	-0.328779	-0.840211	-1.09433	-0.105186	-0.225249	-0.836366	-0.537006	-1.2909	-2.04079	-0.445841	-0.551505	-0.974672	-0.729331	0.0370534	-0.723905	-0.261187	-1.23121	-1.25654	-0.602977	-0.641248	-2.02792	-1.58197	-1.05869	-0.837305	-1.20446	-1.47593		-0.573125	-0.778395	-1.16681		0.138306	0.437666	-0.316229	-1.06612	-0.482894	0.1724	0.380061	0.796712	-0.415158	0.455718	0.488628	-0.166666	0.488628
YAL055W	PEX22	96.4459	57.8205	26.4025	-1.63415	-1.37061	-0.28291	-0.85489	-0.75422	0.176385	-2.56278	-1.90445	-0.606792	-1.62878	-1.51244	0.05972	-0.388833	0.210295	0.322126	0.247457	-0.598046	-0.671179	-0.928711	0.392588	-1.08638	-1.20721	-1.20239	0.212413	-0.391447	-0.679671	-0.93126	-0.335193	-0.183999	-0.298275	-0.652384	-0.0796561	-2.17395	-1.51561	-0.217959	-1.23995	-1.83456	-0.187737	0.488338	0.536035	-0.550009	0.180175	0.0302219	-1.6166	0.0302219
YAL056C-A
YAL056W	GPB2	152.941	89.6714	58.9068	-0.567252	-0.432356	-0.0162042	0.00156105	0.808068	0.392085	-1.06681	-0.672955	-0.279402	-0.155105	1.05496	0.387983		-0.831514	-0.820595	-0.896648	-0.566742	0.24288	-0.194337	0.230166	-1.04502	0.132309	-0.352112	0.00503753	-1.15233	-1.22952	-1.15581	-0.911158	-0.84806	-0.801318	-0.864461	-0.591104					1.87556	1.28463	0.478276	0.110571	0.512349	0.225129
YAL058W	CNE1	88.9136	74.525	32.2144	-0.539619	-0.854461	0.552911	-0.00349155	0.620422	-0.657865	-1.02807	-1.22698	0.419208	-0.163799	0.746593	-1.20988		-0.260974	0.198072	-0.774727	-0.719131	-0.607308		-0.664038	-1.24639	-1.11361		-1.13666													0.548521	-0.435153	0.527258	0.506306		0.472618
YAL059C-A
YAL059W	ECM1	130.331	93.0441	71.4589	0.413016	0.123933	0.783832	0.519156	0.240049	0.0771574	0.307693	0.0571935	0.702672	0.735511	0.121505	-0.0912891	0.395364	0.587576	0.293077	0.460784	0.420065	0.604302	0.50654	0.15731	0.258978	0.661962	0.459387	-0.0879837	-0.318346	-0.104607	0.514449	0.460946	-0.1202	0.227843	0.713036	0.627303	-0.0876711	-0.338171	0.307307	0.340147	-0.171572	-0.552074	0.161086	-0.0576599	-0.25365	0.245293	-0.859381	-0.478879	-0.859381
YAL060W	BDH1	173.256	118.926	99.5004	1.26237	-0.299321	0.355156	-0.00197767	2.02911	1.59652	1.49863	-0.498342	0.176457	-0.161194	3.06157	2.22095		0.266074	0.802998	0.449859	1.19439	0.454039	0.232062	0.838625	1.2822	0.441757	0.141587	0.781899	-0.24473	-0.707559	-0.351577	-0.624113	-0.0559515	-0.323788	-0.104895	-0.336213					2.25857	1.7711	-0.0878074	0.0122826	0.246482	0.0567262
YAL061W		183.701	107.928	267.655	0.0197287	-0.427226	0.181396	-0.314076	0.877261	1.37365	-0.243764	-0.666221	-0.03684	-0.698215	1.16867	1.88178	-0.958848	0.30936	1.13962	2.03158	0.0700195	0.0553535	-0.00149366	-0.0808256	-0.203582	-0.142505	-0.128831	-0.392028	-0.16848	-1.18246	-1.25845	-0.793962	0.0105959	-0.758271	-0.961402	-0.487036	0.715084	0.292627	0.922008	0.260633	0.0290524	-0.149798	0.273601	0.197858	0.83257	0.311202	-1.07181	-0.892956	-1.07181
YAL062W	GDH3	164.074	92.8617	56.121	0.0794855	-0.161595	-0.153288	-0.191018	0.46981	0.835273	-0.159974	-0.317572	-0.447677	-0.486472	0.499084	1.06245	-0.735973	-0.132321	0.0876409	0.533353	-0.288258	-0.451777	0.27655	0.0420302	-0.677021	-0.885688	0.193097	-0.235169	-0.367155	-1.12441	-0.283112	-1.21007	-0.162799	-0.705162	-0.0402326	-0.85653	0.575999	0.418401	0.288296	0.249502	0.411443	0.529093	0.388763	0.433911	0.23333	0.277199	0.240797	0.123147	0.240797
YAL063C	FLO9
YAL063C-A
YAL064C-A
YAL064W
YAL064W-B		79.043	53.7126	44.402	-0.310955	-0.67923	-0.879541	-0.275224	0.153099	-0.360306	-0.707441	-0.996985	-1.33918	-0.631364	-0.021386	-0.757041	-0.796577	-0.254917	0.0644251	0.278008	0.361184	-0.593977	-0.52356	-0.403436	0.181172	-1.09408	-0.733296	-0.803927	-1.24978	-1.98085	-2.03388	-1.04585	-0.93311	-1.4887	-1.69377	-0.71071	0.0891368	-0.200407	-0.542602	0.165213	-0.085811	-1.03505	0.180012	0.5001	0.960477	0.400491	-0.492448	0.456791	-0.492448
YAL065C		243.453	234.861	175.754	0.372827	0.357372	-1.21869	-0.661128	-0.664798	-0.46758	0.251341	0.363591	-1.75549	-1.29538	-1.36548	-0.920296	-0.148689	0.743422	0.836408	0.883465	-0.278813	-0.538011	-1.35393	-0.627106	-0.664539	-1.01206	-1.69472	-1.0895	-0.167082	-0.174883	-1.40434	-0.226548	0.0118158	0.163548	-1.09919	0.0168188	0.40003	0.51228	-1.6068	-1.14669	-2.20189	-1.80376	0.385727	0.47405	-0.595531	0.462396	-0.196958	-0.595089	-0.196958
YAL066W		10.5069	7.59547		-1.23657	-0.642255					-2.00532	-0.948454						-0.927835		-3.17662
YAL067C	SEO1	15.5883	13.7252	8.348	0.0664074	-1.95815	-1.46008				-0.178312	-2.67561	-2.05181					-3.28647	-1.07312	-3.52444
YAL067W-A
YAL068C
YAL068W-A
YAL069W
YAR002C-A	ERP1	127.806	94.8794	57.8057	-0.922271	-0.563401	0.238713	-0.334846	-0.200306	0.0838764	-1.56461	-0.844955	0.0335179	-0.733955	-0.602157	-0.0810639	-0.403972	0.289848	-0.121045	0.176687	0.223894	0.323993	0.131625	0.172719	-0.000246849	0.251177	0.0252975	-0.0683091	-0.593865	-0.620603	-0.564478	-0.437029	-0.360661	-0.244234	-0.305972	-0.170085	-1.16064	-0.440983	0.43749	-0.329983	-0.481112	-0.257751	0.224141	0.0728152	0.331269	0.241029	-0.69524	-0.918601	-0.69524
YAR002W	NUP60	90.2003	70.6791	46.8856	0.337471	0.592227	-0.482019		-0.219018	-0.0122083	0.201766	0.671845	-0.851206		-0.632908	-0.22729	0.465293	-0.57177		-0.742699	-0.23463	0.323982	-0.0814746	0.360286	-0.606155	0.251162	-0.221436	0.17117	-0.880485	-0.742518	-0.437667	-0.154226	-0.610809	-0.355772	-0.186204	0.0810396	-0.263527	0.206553	-1.3165			0.515409	0.371525	0.07282	-0.0352322	0.189116	1.83191		1.83191
YAR003W	SWD1	87.9807	61.9203	36.6577	0.356934	0.184429	0.295779	-0.387202	0.0462129	-0.204566	0.229057	0.136597	0.103569	-0.824041	-0.197038	-0.520029	-0.346215	-0.779792	-1.09436	-0.923293	-0.452833	-0.18266	-0.270177	-0.232939	-0.894495	-0.491306	-0.439921	-0.586241	-1.05379	-1.13823	-1.11343	-0.844687	-0.762064	-0.7178	-0.824434	-0.53208	0.575272	0.482811	0.449784	-0.477827	0.897324	0.403263	0.441662	0.308646	0.384512	0.353302	-0.0465202	0.44754	-0.0465202
YAR007C	RFA1	238.958	226.876	165.183	0.127461	-0.0132315	0.103218	1.07303	0.301068	-0.295068	-0.0927043	-0.122839	-0.132807	1.68855	0.221781	-0.657759	-0.363567	-0.810539	0.524141	-1.66225	0.100926	-0.216952	-0.249518	-0.0426574	-0.162742	-0.54156	-0.416002	-0.343296	-2.04832	-1.89256	-0.851805	-1.03912	-1.63004	-1.40793	-0.577343	-0.704731	0.270863	0.240728	0.23076	2.05211	-0.30236	1.0045	0.263667	0.324608	0.161341	0.300638	0.773735	-0.53312	0.773735
YAR008W	SEN34	36.815	30.7282	14.3431	-0.482214	-0.927788	-0.767891	0.196349	0.179573	-1.13213	-0.947576	-1.32323	-1.20213	0.180064	0.022121	-1.93164	-1.92607	-1.56006	-0.885688	-1.62174	-0.642322	-0.283223	-0.511732	-0.375403	-1.14489	-0.638677	-0.719601	-0.768135				-1.96331				-1.5254	0.978492	0.602842	0.723942	2.10613	0.907809	-0.309891	0.50257	0.355454		0.392732	-1.03383	0.183867	-1.03383
YAR014C	BUD14	82.5272	56.617	35.4757	0.568601	0.445862	0.405915	0.702341	-0.0619511	-0.306639	0.525851	0.479736	0.238765	1.05071	-0.37479	-0.675369		-0.725691	-0.945198	-1.10714	-0.118924	0.377537	0.0588648	0.0919821	-0.453258	0.329645	-0.0589465	-0.171392	-0.703931	-1.00944	-0.4579		-0.456721	-0.59997	-0.205313						0.570408	0.431775	0.334334	0.047892	0.146367	0.263374
YAR015W	ADE1	239.421	139.102	83.7784	1.30217	1.28993	1.14878	-0.0998672	0.260318	-0.665776	1.55444	1.58761	1.15066	-0.329631	0.154815	-1.22192	0.327463	1.73679	0.571951	1.0377	0.349287	0.455154	1.29155	0.912247	0.16545	0.44339	1.3683	0.875897	-1.45791	-0.945564	1.52985	1.9794	-1.11476	-0.541535	1.67205	1.97567	1.22698	1.26015	0.823199	-0.657094	-0.417137	-2.25962	0.183836	0.011764	-0.30375	0.0363499	-3.08282	-1.24034	-3.08282
YAR018C	KIN3	138.991	93.1581	56.9513	-0.0442951	0.030453	0.132836	-0.261461	0.501098	-0.146681	-0.333536	-0.0655019	-0.0964498	-0.607682	0.550502	-0.431937	-0.672836	-0.114727	-0.859057	0.0322868	0.000510724	0.287892	0.0331449	-0.527282	-0.295433	0.198273	-0.0887258	-0.96205	-0.609958	-1.09069	0.226501	-0.450575	-0.374706	-0.674306	0.441079	-0.182114	0.3393	0.607335	0.576387	0.0651543	1.40956	-0.464224	0.295944	0.0896188	-0.529805	0.434768	-1.04061	0.833173	-1.04061
YAR019C	CDC15	87.0499	61.3964	36.1746	-0.500826	-0.908071	-0.081645	-0.0540946	0.199532	-0.310102	-0.973672	-1.29735	-0.359733	-0.25087	0.0549203	-0.680639	-1.44418	-1.44519	-2.13479	-1.40127	0.205411	-0.206347	-1.10193		-0.0246713	-0.526018	-1.40295		-1.14551	-1.6472	-1.82164		-0.842113	-1.18345	-1.49332		0.470512	0.146838	1.08445	1.19331	2.18971	0.720633	0.230082	0.319671	0.0903691		-0.363819	1.10526	-0.363819
YAR019W-A
YAR020C	PAU7	29.8586	15.7232	16.4682	-0.664716	-0.19725	-0.869262	-0.970256	-0.739009	-1.02103	-1.20347	-0.36437	-1.32656	-1.82729	-1.48744	-1.76256		-1.2754	-0.359086	-0.894879	-0.977623	-0.961904	-2.16364		-1.58797	-1.63326	-2.63224														-1.12835	-0.867681	0.610346	0.671358
YAR023C		299.432	163.652	76.0033	0.413857	-0.811102	0.30362	0.55383	0.385041	0.756803	0.308873	-1.17007	0.113195	0.795174	0.359779	0.943027		0.879384	1.24959	1.18013	0.464199	0.660073	0.523476	0.837632	0.317299	0.743692	0.478995	0.780631	-0.510325	-0.425468		-0.994119	-0.287751	-0.0657083		-0.664773					-0.889816	-0.237106	0.1469	-0.0836192		0.057001
YAR027W	UIP3	339.331	228.441	107.599	0.619565	-0.0145819	-0.130865	-0.229128	-0.246185	0.689837	0.597312	-0.124612	-0.420153	-0.552047	-0.677553	0.841115		1.02393	0.459876	0.833609	0.224413	-0.156702	-0.39449	-0.125826	0.000438306	-0.453265	-0.583855	-0.449482	1.82227	0.488437	-0.355239	-0.180765	1.74803	0.770409	-0.108353	0.0574733					-1.13743	0.00750607	0.223975	0.296563	-0.475502	0.323657
YAR028W		268.025	163.572	76.9302	-0.344714	0.241934	-1.65434	-0.481583	-0.970655	-0.101147	-0.754776	0.212074	-2.29027	-0.986441	-1.86812	-0.362642	0.639207	1.74627	0.505681	1.09608	-0.735537	0.0373208	-0.535617	-0.530648	-1.26807	-0.168931	-0.747256	-0.966347	1.70345	0.971004	-0.0365821	0.404377	1.64433	1.2119	0.192606	0.577071	-1.39398	-0.427133	-2.92947	-1.62565	-2.3738	-1.45872	0.532532	0.206252	-0.939863	0.435699	1.47075	0.555678	1.47075
YAR029W		430.83	243.674	102.762	0.0937307	-0.551713	0.340695	-0.0507277	-0.00496934	0.441881	-0.14	-0.829615	0.158705	-0.245077	-0.281149	0.463764	0.870578	1.78536	2.20533	2.32026	0.414201	0.459033	0.537172		0.25123	0.449074	0.494853		0.512122	1.00977		-0.612558	0.604594	1.24737		-0.325952	-1.01058	-1.70019	-0.711873	-1.11566	-2.48648	-1.85649	0.162971	0.00995848			-1.14462	-1.77461	-1.14462
YAR030C		62.6479	42.6484	28.2236	-0.516952		-1.21088	-0.47415	-0.4973	-0.650656	-0.996284		-1.74591	-0.973653	-1.09022	-1.19891		0.370714	-0.285046	0.829509	-0.257829	-0.265058			-0.63681	-0.612058			-0.985136	0.418677			-0.702145	0.706586							-0.805178	-2.02842	0.378982	0.346999
YAR031W	PRM9	128.91	79.8285	57.8179	-0.736519	-0.645713	-0.716189	-0.719966	-0.247455	-0.220714	-1.30415	-0.952992	-1.13866	-1.39662	-0.679639	-0.544604	-0.833506	-0.0895978	-0.760751	-0.173054	-0.104387	0.039875	-0.561497	-0.693115	-0.434048	-0.165188	-0.777221	-1.17378	-0.28094	-0.43926	-1.16057	-0.978087	-0.0875547	-0.078326	-0.868959	-0.650536	-0.470649	-0.119486	-0.305153	-0.563116	0.0811119	-0.371551	0.329661	0.205063	0.0917379	0.480665	-0.0663978	0.386265	-0.0663978
YAR033W	MST28	142.613	97.0708	51.2356	1.22724	0.184384	0.191821	-0.295611	-0.9789	-0.25419	1.44938	0.136537	-0.0240434	-0.666443	-1.88167	-0.595549	-1.13948	0.280157	-0.00373662	0.354951	-0.162105	-0.309175	-0.449826	-0.183956	-0.510318	-0.676709	-0.647925	-0.523701	-0.841497	-0.829285		-1.19097	-0.576783	-0.435153		-0.839572	2.58887	1.27602	1.11544	0.473039	-1.87793	-0.9505	0.348213	0.367534		0.339745	-2.06594	-2.99337	-2.06594
YAR035C-A
YAR035W	YAT1	106.921	61.5183	173.259	1.40126	-1.62843		-1.31717	-1.21227	-1.24072	1.69338	-2.24284		-2.42421	-2.26518	-2.0969		-1.25774	0.222516	0.131151	-1.86979	-2.80867		-2.31859	-2.7669	-4.33963		-3.24914	-3.22525	-2.99878			-2.65722	-2.41999							-2.4877	-2.22805	0.897115	1.53097		0.930547
YAR042W	SWH1	173.331	82.5635	34.565	0.285709	-0.371009	0.191182	-0.120406	-0.381054	-0.180313	0.129187	-0.592434	-0.0248273	-0.364971	-0.899191	-0.48312	0.54868	0.909362	0.23928	0.147038	0.509054	-0.106901	0.220907	-0.04921	0.376572	-0.380283	0.128672	-0.351662	0.582105	0.598165	0.088957	0.657155	0.665672	0.870797	0.311174	0.801534	-0.419493	-1.14111	-0.573507	-0.913651	-1.13847	-0.630157	0.132482	0.273382	-0.182502	0.302452	-0.0566505	-0.564964	-0.0566505
YAR047C		38.0367	17.6813	10.0816			-0.427832		0.458	-0.0775774			-0.78469		0.479676	-0.326772				-0.87223																						0.545458
YAR050W	FLO1	170.637	124.922	89.0436	0.371311	0.512049	-0.814309	-0.491317	0.155049	-0.262852	0.249216	0.566609	-1.2591	-1.00319	-0.0181816	-0.608732	-0.308236	0.00223966	-0.105371	0.241418	-0.156053	-0.303567	-1.36346	-0.39528	-0.502321	-0.668492	-1.70576	-0.793514	-0.414339	-0.280504	-0.981973	-0.641681	-0.203979	0.0669176	-0.700281	-0.351813	0.557452	0.874845	-0.950869	-0.694955	0.087189	-0.85015	0.346268	0.364924	-1.00548	0.398233	0.100719	1.03806	0.100719
YAR053W		123.385	87.9476	42.6644	-0.416387	-1.3172	-1.0282		-0.641903	-1.31159	-0.855275	-1.83434	-1.52167		-1.32786	-2.20475		-1.48473		-0.395397																						-1.80935
YAR060C		169.082	118.55	66.7742	-0.0643061	0.87642	-0.951749	-1.26535	-1.37819	-1.40284	-0.361595	1.04486	-1.42782	-2.33506	-2.53785	-2.34363	-1.26477	0.316917		-0.082238	-1.05182	-1.04212			-1.68602	-1.75081			-0.989883	-0.94547		-1.36558	-0.706287	-0.541449		-0.994626	0.903175	2.30963	-0.163047	-1.07029		-2.26139	0.634196	0.708695			-2.09834		-2.09834
YAR064W		187.22	113.647	63.578	0.874359	-1.06406	-0.329842	-0.968816	-1.39329	-0.775514	0.954577	-1.50209	-0.664404	-1.82481	-2.56266	-1.38892	-0.819471	1.16459	1.33384	1.37485	-0.431374	-0.553573	-1.80704	-1.21591	-0.866139	-1.03487	-2.21935	-1.84127	-0.156433	-0.113136		-1.37824	0.0211095	0.22004		-1.00586	1.77405	-0.682623	0.155067	-1.00534	-3.8965	-2.76377	0.434765	0.481294		0.625359	-2.91884	-4.05157	-2.91884
YAR066W
YAR068W		194.866	98.2511	60.7388	0.240301	0.511463	1.19649	-0.0358412	0.537978	-0.0218747	0.0655165	0.56584	1.20923	-0.219462	0.611109	-0.242001	1.10308	1.13871	1.47527	1.68075	0.70139	0.513801	1.00971	0.298452	0.63073	0.529335	1.04198	0.0922228	0.775489	0.916978	-0.0369847	0.374036	0.834449	1.16247	0.192226	0.550128	-1.03756	-0.537242	0.106147	-1.32254	-0.864156	-1.92275	0.0706596	-0.0155344	0.849751	0.206229	-2.0289	-0.970303	-2.0289
YAR069C		18.4451	15.4457	10.5212	-0.265858	-0.101287	-0.11725	-0.958414	-0.810834	-0.490817	-0.644206	-0.238415	-0.403439	-1.80692	-1.60547	-0.955658		-1.20034	-0.502007	-0.365792	-0.658825	-0.819645		-0.820047	-1.1667	-1.42479		-1.33584		-2.74929				-2.19174							-1.10347	-0.589866	0.507874	0.605142		0.515796
YAR070C		18.3723	9.99703	8.98346	-0.474828	-0.142186	0.24113	-0.895636	-1.27384	-1.18338	-0.93722	-0.292097	0.0364849	-1.69889	-2.36635	-2.00963		-0.068401	-0.156741	-2.40733	0.470561	-0.104394		-0.0579064	0.325706	-0.376609		-0.362765	-2.24256	-2.26156			-1.79957	-1.74552							-2.20961	0.397696	0.144855	0.272215		0.304859
YAR071W	PHO11	19.8447	8.50249	10.9728	0.272401	-0.0407821	1.02435		1.12787	-0.376721	0.110527	-0.159	0.997912		1.58051	-0.782023		-1.08914	-0.683653		0.870981	-0.0257799	-0.532112	0.966797	0.854833	-0.261403	-0.743199	0.945545	-2.62986		-1.23047	-1.28542	-2.13758		-0.934982	-0.923448					2.26416		0.0161478	0.235623	0.191784	0.0212521
YAR073W	IMD1	158.051	108.374	63.8671	-0.349123	-0.728616	0.344617	1.02055	0.0715319	-0.803489	-0.760958	-1.06181	0.163519	1.59825	-0.155429	-1.4315	-0.966498	-0.389482	-0.728945	-1.0675	1.59097	0.387476	0.429665	-0.251882	1.80625	0.34421	0.370378	-0.610428	-1.50748	-0.602864	0.325255	-1.8389	-1.15802	-0.228005	0.534349	-1.41493	0.20554	-0.0953084	1.13002	2.56474	0.573515	-0.363994	-0.215279	0.0432659	-0.163971	0.358545	-1.49401	-0.556501	-1.49401
YAR075W
YBL001C	ECM15	328.205	172.017	85.7412	0.683502	0.91606	2.30341	0.977932	0.534267	1.7375	0.686963	1.09689	2.56801	1.52492	0.605011	2.4355		1.68444	1.9381	2.15059	1.22557	1.13457	1.05191	2.32182	1.3234	1.43905	1.09083	2.67559	1.17406	1.00985	-0.108911	0.309744	1.1823	1.24744	0.124294	0.493038					-1.33309	0.284904	-0.0978294	-0.304481	0.966534	-0.353776
YBL002W	HTB2	1063.5	442.445	206.479	1.18147	2.14806	2.51092	1.90932	1.68712	2.04613	1.3852	2.71393	2.82274	3.12754	2.49956	2.90518	2.09143	2.64077	2.60079	2.06752	2.11029	1.81518		2.66071	2.4925	2.43647		3.10829	2.40626	1.7978		1.94843	2.25771	1.96832		1.94816	-0.706234	0.622492	0.731305	1.03611	-0.101234	0.837664	-0.382205	-0.621286		-0.447573	0.106359	-0.832539	0.106359
YBL003C	HTA2	1668.12	974.935	440.276	1.64631	1.90913	2.65155	2.19434	0.827691	1.6999	2.03699	2.40032	2.99537	3.61796	1.08721	2.37827	2.23646	2.78666	2.64908	2.50963	1.9863	2.29424		2.42142	2.32866	3.13852		2.80277	2.88388	2.08393		2.4795	2.67456	2.2301		2.41975	-0.199468	0.163868	0.758912	1.38151	-1.56187	-0.131355	-0.342351	-0.844274		-0.381344	-0.890267	-2.32079	-0.890267
YBL004W	UTP20	406.177	266.11	127.58	-0.471458	0.432778	0.498011	0.162583	-0.302929	-0.117923	-0.932494	0.462563	0.351816	0.121962	-0.770803	-0.388172	0.396381	-0.383878	-1.60833	-0.628772	0.365151	0.687007	0.672372	0.134491	0.186414	0.783163	0.651391	-0.117118	1.84978	2.18621	0.805782	0.960407	1.77204	2.32368	0.988189	1.07082	-1.32888	0.0661822	-0.0445649	-0.274419	0.837527	0.2406	0.178737	-0.0961561	-0.336798	0.251609	0.285165	0.882092	0.285165
YBL005W	PDR3	147.942	81.0105	50.0927	0.234792	0.415699	0.817023	0.0309742	0.207454	0.0856235	0.0577925	0.440146	0.743416	-0.104494	0.0679389	-0.078405	0.0895702	-1.17238	-1.78418	-1.25298	0.474733	0.524139	0.680231	0.393719	0.331219	0.544485	0.660491	0.213856	0.143716	0.370519	-0.16607	-0.3617	0.283066	0.662527	0.0703097	-0.103194	-0.0317777	0.350576	0.653845	-0.194065	1.85212	1.17458	0.143514	-0.0203465	0.590182	0.179863	0.520731	1.19828	0.520731
YBL006C	LDB7	257.359	160.078	98.4267	0.563798	0.844129	0.427975	0.171473	-0.920556	0.256468	0.519116	1.00247	0.265844	0.13726	-1.78579	0.181595	1.07421	2.28096	1.74515	2.09952	0.595792	0.239849	0.109395	0.274429	0.49119	0.127868	-0.000440815	0.0615505	2.10735	1.80912		1.26832	1.99683	1.97868		1.34424	-0.555096	-0.0717376	-0.808368	-0.936952	-3.53093	-1.91792	0.104602	0.111981		0.212878	-1.10955	-2.72257	-1.10955
YBL006W-A
YBL007C	SLA1	475.364	300.893	213.607	0.525357	0.404113	0.156729	-0.201682	0.701941	0.222767	0.465215	0.424939	-0.0671195	-0.504822	0.880559	0.130306	0.439201	0.579111	0.803859	0.534352	0.238072	-0.031493	-0.273291	0.168831	0.0184885	-0.269775	-0.443527	-0.0732739	1.47344	1.39994	-0.00262903	0.776525	1.44359	1.60433	0.224674	0.907533	0.026014	-0.0142616	-0.50632	-0.944023	0.0767001	-0.404047	0.219584	0.238282	-0.668201	0.242105	0.102274	0.58302	0.102274
YBL008W	HIR1	65.2818	47.1618	33.0634	0.219726	-0.535517	-0.875809	-0.270379	-0.0409943	-1.0263	0.0366674	-0.808357	-1.3346	-0.623027	-0.34035	-1.77059		-1.78065	-1.84444	-1.82263	-0.85968	-0.615002	-0.82214		-1.43212	-1.12489	-1.079		-1.21655	-1.333	-2.0392		-0.904108	-0.895995	-1.6988						1.50409	0.0520388	0.572436	0.509887	0.619796
YBL008W-A
YBL009W		58.5095	45.5784	31.0147	-0.470113	0.130653	-0.36951	0.0267753	-0.452224	-0.388749	-0.930608	0.0660146	-0.713097	-0.111719	-1.01615	-0.800327	-0.975199	-0.900186	-1.13049	-1.16663	-0.137803	-0.0740566	0.0285153	0.176636	-0.478204	-0.332151	-0.0940862	-0.0633091	-1.76311	-1.94886			-1.38112	-1.45944			0.0445906	1.04121	0.262102	0.86348	0.114339	0.366305	0.340402	0.258094		0.239945	0.104203	-0.147762	0.104203
YBL010C		48.9157	36.8094	23.4	-0.45692	0.17728	-0.459086	-0.357234	-0.14019	-0.461836	-0.91211	0.127214	-0.823056	-0.772477	-0.503364	-0.911554	-1.09748	-0.600063	-0.504068	-0.851538	-0.139828	-0.31695	-0.317939	0.0571488	-0.480881	-0.688103	-0.495222	-0.215866	-0.528552	-0.368616	-1.5773	-0.849333	-0.303658	-0.0136953	-1.26254	-0.536205	0.18537	1.22469	0.274423	0.325002	0.000703995	-0.0600159	0.341053	0.371153	0.767322	0.273015	-0.334439	-0.273719	-0.334439
YBL011W	SCT1	375.667	200.98	112.446	0.134236	-0.169216	0.175381	-0.152451	0.68445	0.123907	-0.0832047	-0.327574	-0.0442244	-0.420111	0.851815	-0.0201427	-0.0338777	-0.167264	-0.530479	-0.137833	0.179639	0.0814038	-0.030857	-0.0974085	-0.0587271	-0.104329	-0.162829	-0.4132	0.425081	0.49151	-0.425112		0.528629	0.77322	-0.174346		-0.049327	-0.293696	-0.0103467	-0.386233	1.38229	0.11769	0.238366	0.185732	0.011517	0.315792	0.128037	1.39264	0.128037
YBL012C		275.547	201.333	102.866	0.671341	-1.03628	-0.726737	-0.411065	-0.38896	0.557551	0.669911	-1.46562	-1.15161	-0.865102	-0.912184	0.639796	-0.126223	1.15417	1.15908	1.00006	0.144238	-0.152905	0.157164	-0.51402	-0.105508	-0.447701	0.0548675	-0.945117	0.435276	0.388806	-0.549528	-0.244723	0.537527	0.679258	-0.291853	0.000679797	0.796134	-1.3394	-1.02538	-0.738879	-2.07127	-0.360267	0.249745	0.294796	0.34672	0.431097	0.665117	-1.04588	0.665117
YBL013W	FMT1	155.432	75.3824		-0.218353	-0.884996	-0.59339	-0.379159	0.159833	-0.407045	-0.577596	-1.26706	-0.987918	-0.810202	-0.0103189	-0.828171		0.703304	0.907536	0.811496	-1.09571	-1.53017	-0.939172		-1.74402	-2.46603	-1.2145				-1.71976				-1.3971						-0.917855	-1.63967	0.648303	0.935867	0.182594
YBL014C	RRN6	136.59	113.55	79.7279	-0.0513451	-0.008697	0.0229113	0.133044	-0.236489	-0.168487	-0.343422	-0.116888	-0.231386	0.0711359	-0.661619	-0.465122	0.368021	-0.614677	-0.636371	-0.812005	0.0537923	0.506436	0.0454421	0.552727	-0.225025	0.518543	-0.0744878	0.416873	0.256786	-0.124616	-0.206181	-0.0944727	0.381749	0.209537	0.0324266	0.1341	-0.711443	-0.484909	-0.599408	-0.296885	-0.025248	0.346883	0.278817	-0.0121065	-0.106914	0.135854	0.94629	0.57416	0.94629
YBL015W	ACH1		131.013	211.225	-0.0492827	-0.522649	0.288695	0.489712	1.39969	2.09836	-0.34053	-0.791467	0.0948726	0.684847	2.02721	2.98468	-0.617714				-0.185944	-0.374516		-0.09838	-0.54182	-0.772465		-0.414441									0.277184	-0.173753	0.712587	1.30256			0.355876	0.397949		0.316061
YBL016W	FUS3	86.4417	59.1603	41.512	0.574078	0.522208	0.115225	-0.293069	-0.159156	0.0967994	0.533531	0.579943	-0.118068	-0.662069	-0.534532	-0.061397		0.217977	-0.344199	0.361486	0.583209	0.43967	0.18874	0.151291	0.474562	0.420698	0.0914272	-0.0956682	0.978714	1.26599	0.517485	0.057394	1.01181	1.48178	0.715903	0.268955					-0.190333	-0.422883	0.108647	0.0189713	-0.624476	0.246959
YBL017C	PEP1	243.209	164.967	112.277	-0.794978	-0.648173	-0.302535		1.00925		-1.38613	-0.956222	-0.630883		1.38558				-0.201659	-1.01551	-0.509405	0.32417	-0.0277612		-0.969251	0.251437	-0.159245		-0.293193	-0.569901	-0.561267	-1.39912	-0.0982481	-0.197847	-0.302939	-1.02441					1.58724		0.459846	0.0727326	0.143695
YBL018C	POP8	422.544	232.862	124.932	-0.0838601	0.952977	0.0223503	0.583228	0.185008	-0.0920508	-0.389014	1.14534	-0.232075	0.845758	0.0310529	-0.348798	0.575026	1.26531	1.19684	1.35144	0.462777	0.644333	0.809616	-0.249697	0.31542	0.720626	0.810298	-0.607638	1.13881	1.03703		0.644141	1.15154	1.2723		0.789978	-0.964039	0.570316	-0.807101	0.270732	-1.16578	-1.70024	0.147357	-0.0762928		0.357941	-0.893136	-0.358682	-0.893136
YBL019W	APN2	98.0963	51.1743	28.686	-0.563096	-0.764468	-0.869348	-0.41234	-0.10764	-0.419818	-1.06099	-1.10886	-1.32667	-0.867296	-0.449873	-0.84761	-1.05781	-2.03282	-0.427379	-1.09588	-0.841577	-0.470923	-0.818733	0.494658	-1.40819	-0.913746	-1.07506	0.342733	-0.130665	-0.164769	-1.4892	-1.06513	0.0435991	0.172801	-1.17934	-0.727828	-0.00317806	-0.0510543	-0.268859	0.190512	-0.0224945	0.248267	0.566617	0.442823	0.104285	0.151926	0.517126	0.246364	0.517126
YBL020W	RFT1	96.5047	63.8961	35.0035	0.473978	-0.756877	-0.235855	-0.385813	0.0829819	-0.499154	0.393174	-1.0989	-0.549031	-0.821652	-0.136613	-0.968346	-0.674943	-0.534266	-1.0568	-0.308124	-0.441311	-0.0842053		-0.803518	-0.87927	-0.347023		-1.31474	-1.36421	-0.303991	-0.264954	-1.18525	-1.03299	0.0454295	-0.0230824	-0.834493	1.06812	-0.423956	0.125912	-0.146708	0.920189	-0.660222	0.437959	0.262818		0.511221	-0.786134	0.794277	-0.786134
YBL021C	HAP3	189.834	153.127	90.973	0.703416	0.222996	-0.253108	-0.979581	-1.21878	-0.637455	0.714885	0.187217	-0.57021	-1.84334	-2.27588	-1.17882	1.01283	1.91596	1.00944	1.0289	-0.134949	-0.176447	-0.32064	0.795625	-0.474433	-0.482201	-0.498349	0.726998	1.43674	1.32904	0.0875831	1.29607	1.41156	1.53947	0.309876	1.36888	-0.297943	-0.825612	-1.58304	-2.85617	-3.28532	-2.20772	0.339484	0.305754	-0.808225	0.0686272	-0.624685	-1.70228	-0.624685
YBL022C	PIM1	380.7	233.312	135.048	0.00184893	0.175981	-0.997096	-0.159824	0.403799	-0.803627	-0.268835	0.125508	-1.48348	-0.432798	0.390604	-1.43171	-1.11213	-0.598967		-0.389527	-0.340648	-0.556128	-0.442016	-0.0570043	-0.74625	-1.03861	-0.638882	-0.361613	-1.04063	-1.11205	-0.54651	-1.22938	-0.750574	-0.69385	-0.289003	-0.873681	0.843299	1.23764	-0.37135	0.679336		-1.04218	0.405602	0.482483	-0.34988	0.304609	-0.670831		-0.670831
YBL023C	MCM2	100.422	65.698	38.2129	0.462467	-0.511364	-0.401188	-0.0647316	0.479829	-0.14819	0.377032	-0.776655	-0.751983	-0.269173	0.51555	-0.434234		-0.863526	-1.14154	-1.22446	-0.226732	0.00503169	-0.52499		-0.595719	-0.21625	-0.734952		0.621503	0.479246	-0.939146		0.700057	0.762	-0.659833						1.65709	0.790223	0.368986	0.221281	-0.0751187
YBL024W	NCL1	131.636	111.047	55.1136	0.0970067	0.867829	0.654322	0.0437328	-0.0898069	-0.568656	-0.135407	1.03358	0.543694	-0.0825407	-0.420567	-1.07412	1.04837	-0.258772	-1.20469	-0.475741	0.632939	0.533375	0.0410431	0.216897	0.540277	0.558021	-0.0795811	-0.0119042	1.35702	1.32896	0.621434	0.976872	1.34198	1.53939	0.814079	1.08544	-1.18378	-0.014792	-0.50468	-1.13091	0.784118	-0.598377	0.0926617	-0.0246458	-0.89366	0.228801	-0.0936973	1.2888	-0.0936973
YBL025W	RRN10	197.057	119.98	70.9144	0.419083	0.293188	-0.371696	-0.132185	-0.166499	-0.0186825	0.316201	0.279347	-0.715781	-0.385239	-0.5466	-0.237143	0.10353	0.733338	0.28436	0.986819	0.0501758	-0.0157673	0.0648182	0.559301	-0.229804	-0.24673	-0.0520535	0.425267	0.997861	1.28809	-0.166259	0.328989	1.02852	1.502	0.0701316	0.510128	0.212671	0.175817	-0.819311	-0.488769	-0.83096	-1.22396	0.27998	0.230963	-0.122185	0.134034	-0.404651	-0.0116496	-0.404651
YBL026W	LSM2	206.8	148.584	82.8631	-0.475024	0.274309	0.185921	0.459647	0.294822	0.686939	-0.937494	0.254567	-0.0312858	0.633115	0.211516	0.836704	-0.0170319	0.49168	0.6829	0.917428	0.804499	-0.0943775	0.762917		0.766982	-0.361931	0.756227		0.623389	1.01436		-0.078077	0.701703	1.25157		0.148659	-0.920463	0.271599	-0.0142539	0.650147	-0.471385	-0.0807233	0.0375171	0.267553			-0.0664694	-0.457131	-0.0664694
YBL027W	RPL19B	362.956	313.855	220.341	2.48621	2.05508	2.21214	1.67947	0.3784	0.129454	3.21468	2.59189	2.45597	2.73204	0.348865	-0.0117016	2.06375	1.45513	0.707983	1.34233	1.97758	1.85912		2.35288	2.31712	2.50086		2.71526	1.67051	2.15204	2.2429	2.39026	1.61558	2.29241	2.34549	2.34051	1.15093	0.528139	0.392222	0.668291	-0.359117	-1.35403	-0.339546	-0.641738		-0.362375	-1.74625	-0.751339	-1.74625
YBL028C		198.564	196.568	107.402	-0.056097	-0.900797	-0.112858	0.557823	-0.334506	-0.963955	-0.350085	-1.2878	-0.398048	0.802044	-0.822695	-1.6757		0.319728	0.132002	1.15764	1.1097	0.725924	1.10193		1.17028	0.840195	1.14875		0.672278	1.51763	1.7197	1.643	0.744371	1.712	1.85135	1.67695					-0.954697	-2.83334	-0.0605839	-0.114271	-0.7026
YBL029C-A		228.175	181.2	111.146	-0.356342	-0.790484	0.320603	-0.00573107	0.777096	1.88372	-0.771081	-1.14301	0.134042	-0.167652	1.00406	2.65802		1.92873	2.32128	2.05309	0.0870519	0.091011	-0.0629849		-0.181075	-0.0902496	-0.200028		1.02653	0.0775577	-0.201866	0.0923439	1.05355	0.394502	0.0365016	0.29999					-1.31721	0.604934	0.268127	0.181261	-0.23653
YBL029W																							-0.253869				-0.421039				-1.41964				-1.11365										0.692607
YBL030C	PET9	135.807	80.8764	54.2162	1.42536	0.795505	-0.363271	0.716454	2.31498	1.93887	1.72718	0.938655	-0.705439	1.075	3.53136	2.74195	-0.161519	0.349567	1.12069	1.05491	1.50279	1.31121	0.597735	0.958688	1.68972	1.69791	0.564974	0.935191	-0.0429384	0.390028	-1.26455	0.42975	0.120163	0.680376	-0.967168	0.599602	1.8887	1.10017	-0.543919	1.23652	2.41067	1.68704	-0.186935	-0.386701	1.53214	0.0234964	2.23096	2.95458	2.23096
YBL031W	SHE1	79.5082	32.1538	13.499	-0.10368	-0.351199	-0.623396	-0.164245	1.26989	-0.151335	-0.416804	-0.566433	-1.02475	-0.440404	1.8139	-0.439019	-1.35433	-1.16262	-0.30035	-0.226869	0.101748	-0.14253	-0.288325	-0.241052	-0.161654	-0.432496	-0.460934	-0.5966	-0.512339	-0.240244	-1.04451		-0.289509	0.10375	-0.759346		0.93753	0.787901	0.329582	0.91393	2.11425	-0.21215	0.263403	0.289966	0.298413	0.355548	-0.541732	1.78467	-0.541732
YBL032W	HEK2	230.225	216.41	166.876	0.976549	0.125609	0.473204	0.189376	0.103319	0.110217	1.09786	0.0593941	0.321365	0.168065	-0.103192	-0.0409775	0.608977	0.795877	0.507495	0.179701	0.451612	0.302006	0.685869	0.31175	0.300666	0.218957	0.667019	0.109201	0.521768	0.673022	0.589666	0.623125	0.613013	0.939282	0.784076	0.771316	0.488888	-0.549583	-0.287612	-0.440912	-0.610687	-0.220679	0.150946	0.0830491	-0.117057	0.202549	0.0669337	-0.323075	0.0669337
YBL033C	RIB1	118.219	80.3055	67.9674	-0.557112	-0.184825	0.406106	0.149626	0.467062	0.85424	-1.0526	-0.348061	0.238999	0.099668	0.494568	1.09131	0.903081	0.670166	0.539049	0.51583	0.531652	0.0282163	0.355087	-0.471709	0.406433	-0.182273	0.284029	-0.891096	1.2464	0.448409	0.559764		1.24544	0.733788	0.755834		-1.95568	-1.25114	-0.664081	-0.803413	-0.0444808	0.575482	0.125219	0.21049	-0.471806	0.419387	1.23956	0.619601	1.23956
YBL034C	STU1	163.339	127.239	108.625															0.800967	-0.109045		-0.45011				-0.883246																		0.433135
YBL035C	POL12	94.6804	68.8339	57.0836	0.445905	0.190097	0.33198	-0.0409233	0.311466	-0.241269	0.35381	0.144037	0.148008	-0.228207	0.238868	-0.575885	-0.250513	-0.895287	-1.30253	-1.15662	0.0248082	0.429728	-0.248783	0.278195	-0.263326	0.406129	-0.415151	0.0663592	-0.422091	-0.577734	-0.500466	-0.107456	-0.210744	-0.205014	-0.245515	0.122571	0.604323	0.39455	0.398521	0.0223065	1.5414	0.580739	0.288134	0.0235988	-0.169636	0.211836	0.182218	1.14287	0.182218
YBL036C		147.194	108.583	72.3243	0.865556	-0.0474456	0.644708	-0.0648035	0.256744	0.161219	0.942233	-0.167746	0.531892	-0.269297	0.148941	0.0366405	0.274768	0.147814	0.487836	0.139019	0.438385	0.325466	0.704443	1.44812	0.283188	0.253337	0.688525	1.56009	0.989535	0.881722	-0.110477	0.334181	1.02126	1.13022	0.122816	0.514738	0.667465	-0.442515	0.257124	-0.544065	-0.338895	-0.102379	0.155197	0.0721293	0.565709	-0.111964	-0.359502	-0.596019	-0.359502
YBL037W	APL3	115.77	80.1678	58.0364	0.166859	-0.988687	-0.601602	-0.440096	0.474654	0.0583276	-0.0374614	-1.40316	-0.997999	-0.915055	0.507044	-0.119945	-1.24864	-0.944627	-0.0438783	-0.135031	0.0698425	-0.369716	0.109548	0.16585	-0.203816	-0.76543	-0.000263454	-0.07708	-0.430991	-0.128829		-1.15455	-0.218512	0.205682		-0.807232	1.21118	-0.154519	0.250639	0.333582	0.550923	0.0150859	0.273658	0.395714		0.24293	-0.235553	0.300284	-0.235553
YBL038W	MRPL16	235.04	179.159	105.81	0.0429751	-0.571102	0.490843	0.326113	0.794643	0.423665	-0.211168	-0.855063	0.343018	0.403346	1.0329	0.436042		0.792416	0.639137	0.818373	0.138883	0.044492	0.369294	-0.366585	-0.112584	-0.158422	0.300479	-0.756876	0.871492	0.723795	-0.0824914	0.118492	0.918236	0.985734	0.149247	0.323209					0.393765	-0.382331	0.251467	0.202914	0.151232	0.390291
YBL039C	URA7	137.279	134.136	87.0751	0.477838	0.28018	0.750806	1.66426	0.105428	-0.60042	0.398585	0.262274	0.662131	2.70587	-0.0997253	-1.12246		0.00272911	-1.31473	-0.293422	0.776658	1.02949	1.08015	0.988881	0.730192	1.28506	1.12353	0.973741	-1.02885	-0.307188	0.519893	0.696956	-0.740293	0.0425046	0.718177	0.836877					1.215	-0.829036	0.046466	-0.255571	0.405355	0.0151399
YBL039C-A
YBL039W-B
YBL040C	ERD2	260.614	181.235	85.886	0.292284	0.611104	1.36959	-0.103737	0.464338	0.520302	0.138406	0.696622	1.42172	-0.336289	0.490093	0.583108	-0.0726077	0.465763	0.322223	0.550347	0.455894	0.454996	0.515221	0.350125	0.306325	0.443158	0.469437	0.158197	1.29288	0.936881	-0.206038	0.0610688	1.286	1.18068	0.0325613	0.272218	0.211014	0.76923	1.49432	-0.263681	0.167869	0.0327616	0.149569	0.0118375	0.436876	0.191928	-1.46156	-1.32645	-1.46156
YBL041W	PRE7	345.78	274.424	207.144	0.158275	0.608185	0.470547	0.808707	0.451018	0.761573	-0.0494976	0.692791	0.318103	1.23374	0.468202	0.950287	1.30184	1.40605	1.26586	1.13412	0.84946	0.904815	0.399819	0.498937	0.826395	1.10235	0.335821	0.348195	2.02243	1.86491	1.40601	1.40447	1.92272	2.02973	1.55508	1.46514	-1.35134	-0.60905	-0.983738	-0.0681048	-0.797661	-0.183836	0.0230651	-0.197539	-1.21926	0.150741	0.799902	0.186077	0.799902
YBL042C	FUI1	246.261	186.022	136.297	0.86643	0.620487	0.949203	0.417595	-0.438253	0.65785	0.943459	0.708938	0.905671	0.560757	-0.99319	0.792436	1.25052	0.467104	-0.379995	1.02469	0.991019	0.894377	0.13291	1.10713	1.01345	1.08706	0.0267852	1.12472	2.25448	1.39577	-0.583704	1.33627	2.12524	1.60052	-0.32413	1.40458	-0.307063	-0.541584	-0.344851	-0.689765	-0.613195	-0.232254	-0.0224361	-0.19268	0.350915	-0.0175892	0.112597	-0.268344	0.112597
YBL043W	ECM13	94.7135	66.4386	52.682	0.631534	-1.48012	-1.87141	-0.886497	0.985185	0.291197	0.614094	-2.04818	-2.55673	-1.68317	1.34603	0.234447		0.144786	0.357048	1.61073	-0.0391649	-0.38095	-1.89997	-1.46808	-0.347861	-0.781893	-2.32694	-2.16324	3.31889	3.06782	-0.315757	0.766	3.05421	3.13024	-0.0710639	0.898187					0.988983	-1.37629	0.308697	0.400943	-2.25588	0.695153
YBL044W		42.6277	22.5851		-2.17997	-0.921716		-2.67506	-3.12032	-2.3308	-3.32813	-1.31526		-4.76071	-5.40079	-3.75583													-0.691892	-1.14238			-0.446214	-0.721597
YBL045C	COR1	204.466	99.4852	62.9932	-0.194719	-0.262157	-0.183524	0.297998	2.03317	1.54913	-0.544458	-0.449562	-0.484793	0.354969	3.06824	2.14883	-1.08867	-0.0337345		0.482733	0.40298	0.249813	-0.232617	0.222999	0.236402	0.142469	-0.396434	-0.00411347	0.907759	0.838074	-1.19843	-0.719165	0.949888	1.09029	-0.904721	-0.420617	0.544217	0.639112	0.603882	1.44364		1.6661	0.166578	0.107343	0.508288	0.227113	1.06222		1.06222
YBL046W	PSY4	38.6782	28.6629	14.9802	-0.216675	-0.398354	-0.64451	0.201113	0.703102	-0.403423	-0.575243	-0.628325	-1.05067	0.188261	0.882468	-0.822658	-0.11903	-1.06608	-1.4203	-1.26315	-0.0903263	-0.140499	-0.258332	0.410291	-0.415468	-0.42952	-0.426207	0.235015	-0.0530072	-0.0968546	-0.748477	-0.409626	0.111375	0.234935	-0.479753	-0.145751	-0.456213	-0.509295	-0.931641	0.307291	2.30276	0.440494	0.325141	0.289021	0.0535462	0.175276	1.37214	3.2344	1.37214
YBL047C	EDE1	386.212	259.959	157.638	0.590918	0.737135	0.255569	0.454082	0.921873	0.527202	0.557144	0.862041	0.0542096	0.62354	1.24199	0.59361	0.880905	0.202422	0.319408	0.269341	0.974318	0.694024	0.556986	0.548423	0.991386	0.793447	0.517794	0.411378	1.93594	1.83279	0.535496	1.08695	1.84724	2.00034	0.732914	1.18319	-0.323761	-0.0188632	-0.826695	-0.257365	0.922578	0.324269	-0.0170681	-0.0994226	-0.21512	0.137045	1.15096	1.74927	1.15096
YBL048W		104.785	48.1232	25.7446					1.44751	0.809541					2.10579	1.02329		-1.80025	-0.755768	-0.5872	0.454242				0.304142				0.736716	0.723549			0.800609	0.985509							2.86156	1.61049	0.1501
YBL049W	MOH1	153.91	112.473	81.1117	-0.573009	0.209964	-1.21085	-0.0869188	0.195375	0.301224	-1.07489	0.170112	-1.74587	-0.307351	0.0480887	0.249706	-0.422605	-0.071673	0.613668	0.774185	-0.6448	-0.229757	-0.11159	-1.0372	-1.14817	-0.560325	-0.256305	-1.61309	0.904571	0.945738		-0.718906	0.947106	1.18879		-0.420388	-0.65228	0.592718	-1.32327	0.115255	-0.56558	-0.524479	0.503366	0.330568		0.575897	0.798789	0.757688	0.798789
YBL050W	SEC17	167.337	123.244	85.5152	-0.861945	-0.769597	0.339563	-0.191811	0.690275	0.673555	-1.48002	-1.11559	0.157316	-0.487836	0.861388	0.816337		-0.048208	0.0820385	0.200582	0.0762172	0.369618	-0.100375		-0.195392	0.31804	-0.243319		0.625479	0.181405	-0.504422	-0.970291	0.703527	0.48951	-0.249252	-0.643614					0.779349	0.615755	0.271609	0.0515782	0.00593223
YBL051C	PIN4	92.2951	68.5095	45.3858	0.267571	0.632026	0.558448	0.199226	0.629042	0.37177	0.103754	0.724083	0.426004	0.185014	0.76076	0.357066	0.173318	-0.623751	-0.544046	-0.673859	0.607247	0.435571	0.487827	0.399463	0.506326	0.414691	0.437719	0.221191	1.06379	1.04086	-0.231794	0.112003	1.08606	1.27581	0.00823549	0.317447	-0.0695634	0.550766	0.252687	0.0116966	1.30481	1.03092	0.10092	0.0208793	0.429484	0.178273	0.778238	1.05212	0.778238
YBL052C	SAS3	73.9508	53.178	38.9829	-0.108187	-0.263327	-0.0761972	-0.0583923	-0.444105	-0.443111	-0.423123	-0.451098	-0.353046	-0.258265	-1.00281	-0.883057	-0.20692	-1.81515	-2.1295	-1.63139	-0.228564	-0.885353	0.237539	0.38757	-0.598139	-1.52108	0.147928	0.206005	0.166474	-0.505366	-0.696278		0.302928	-0.138806	-0.430452		-0.216203	-0.244178	-0.146125	-0.0513452	1.1267	0.748331	0.369575	0.635727	0.57838	0.181564	0.894456	1.27282	0.894456
YBL053W		39.8582	31.3263	23.3059	-1.92689	0.506443	1.21933	0.0507943	0.0873263	-0.297608	-2.97327	0.559251	1.23726	-0.0703901	-0.129474	-0.661624	0.337913	-0.887353	-0.461942	-0.0714889	0.336518	0.314205		0.609787	0.148577	0.236834		0.489725	0.854289	0.296628		0.412589	0.903222	0.594925		0.584363	-3.31118	0.221338	0.899346	-0.408303	0.332469	-0.590135	0.187941	0.0773711		0.120062	-1.48948	-0.566877	-1.48948
YBL054W
YBL055C		297.653	180.332	100.376	0.240735	0.38739	0.295265	-0.112841	0.31217	-0.344304	0.066125	0.40299	0.102938	-0.351955	0.240026	-0.732689	0.523946	0.349137	-0.127587	0.37991	0.196877	0.147451	0.427223	0.132659	-0.0359484	-0.00753881	0.367551	-0.119457	1.15983	0.976726	0.137794	-0.0990218	1.16988	1.21714	0.357298	0.13006	-0.457821	-0.120956	-0.421008	-0.8759	0.367613	-1.1126	0.232825	0.15499	0.0102522	0.252116	-0.691591	0.788621	-0.691591
YBL056W	PTC3	272.713	200.591	124.365	0.583919	0.767745	0.601815	0.743421	0.708222	0.888446	0.54733	0.902219	0.47924	1.1214	0.89088	1.14337	0.729695	0.0918719	-0.0826288	0.0237867	0.633663	0.694303	1.36946	0.836344	0.541234	0.793855	1.4585	0.778986	0.959377	0.83663	0.471141	0.316322	0.994938	1.08897	0.672133	0.498879	-0.182365	0.172524	-0.250455	0.391705	0.973509	1.11958	0.0924291	-0.0995522	0.786365	0.0573575	1.37004	1.22396	1.37004
YBL057C	PTH2	346.127	185.307	110.347	0.865633	1.28332	0.48196	0.0786326	0.705023	0.108646	0.942342	1.57893	0.332113	-0.0224892	0.885624	-0.0433687	0.502824	1.09565	1.35526	1.13335	0.61545	0.228448	0.608181	0.637409	0.517167	0.11116	0.577069	0.524992	1.23514	1.47809		0.46009	1.23561	1.67583		0.626543	0.439518	1.0761	-0.17071	-0.525313	-0.469634	-1.17671	0.0982832	0.117288		0.112417	-1.006	-0.298924	-1.006
YBL058W	SHP1	636.622	446.253	280.692	0.696369	0.972931	0.911616	0.259258	0.8652	0.815195	0.705004	1.17153	0.859531	0.288309	1.14885	1.03189	1.4894	1.10702	0.84537	0.783207	0.65403	0.443439	0.665537	1.14394	0.568148	0.426223	0.643478	1.17171	2.32393	2.02551	1.05966	1.48088	2.18586	2.17665	1.22797	1.53299	-0.784399	-0.317871	-0.629872	-1.20109	0.303483	0.248683	0.0858823	0.0172166	-0.584492	-0.0277747	0.878555	0.933354	0.878555
YBL059C-A
YBL059W		118.592	84.913	66.1239	0.566753	-0.596859	-0.792352	0.124849	-0.214846	0.227255	0.52326	-0.88887	-1.23215	0.0570351	-0.626051	0.137136	-0.0927819	0.145864	-0.0172345	0.00250279	-0.176912	-0.163383	0.163764	0.0373507	-0.529884	-0.463056	0.0625097	-0.241144	0.574805	0.293583	-0.164126	0.104153	0.659301	0.59214	0.0721458	0.310476	0.616042	-0.796088	-1.13937	0.149817	-0.608816	0.134633	0.352973	0.299673	-0.00963606	0.278494	1.274	0.530554	1.274
YBL060W		103.184	60.5844	42.1667	0.302253	0.116148	-0.816467	-0.229973	-0.190375	-0.678182	0.152384	0.046976	-1.26175	-0.553502	-0.585837	-1.2408	-0.520452	-1.22473	-1.15772	-0.892996	-0.307175	0.32677	-0.324946	-0.411897	-0.702018	0.255247	-0.503335	-0.814729	-0.40373	-0.0587073	-0.669089		-0.19472	0.269835	-0.404773		0.672836	0.567428	-0.741302	-0.0330498	0.57188	-0.347803	0.394843	0.0715226	-0.0985617	0.402832	0.393499	1.31318	0.393499
YBL061C	SKT5	80.3297	52.1712	27.956	0.491341	0.657909	0.157326	-0.0210152	0.199342	-0.066563	0.417519	0.758055	-0.0663868	-0.193951	0.054608	-0.310009	-0.393618	-0.98024	-0.849136	-1.12325	0.362448	0.26936	0.257778	0.377338	0.182843	0.171115	0.171361	0.192941	-0.0140283	-0.182343	-1.25549		0.145394	0.156723	-0.958606		0.811137	1.15167	0.327231	0.199666	0.903744	0.81324	0.179606	0.0982449	1.12997	0.184396	0.486009	0.576513	0.486009
YBL062W		165.18	98.5997	41.2733	-0.555344	1.27074	-0.145209	0.456476	0.601152	-0.227734	-1.05012	1.56241	-0.437761	0.627659	0.714926	-0.555287	0.011384	0.373559	0.185134	0.448527	0.628211	0.744529			0.534029	0.86746			0.89958	0.773583		0.143853	0.94275	1.03128		0.345729	-1.0615	1.55103	-0.449145	0.616275	0.529792	-1.00381	0.0941815	-0.122931			-0.55467	0.978937	-0.55467
YBL063W	KIP1	116.778	85.1944	49.3101	0.661993	0.456938	0.132583	-0.265677	0.816555	0.267407	0.656803	0.494274	-0.0967596	-0.614936	1.06891	0.198241	-0.797295	-0.89404	-0.554702	-0.796427	0.104818	0.307394	0.0460778	0.613792	-0.157598	0.226852	-0.0737517	0.494838	-0.171874	-0.0636957	-0.357555	-0.848044	0.00763347	0.265272	-0.110541	-0.53506	1.4541	1.29157	0.700535	0.182359	1.62361	0.994668	0.262416	0.0805415	0.0367896	0.118953	0.294133	0.923078	0.294133
YBL064C	PRX1	544.101	356.594	217.86	0.108381	-0.717851	-0.258078	-0.588179	1.5151	1.66651	-0.119457	-1.04768	-0.576311	-1.16986	2.21688	2.32747	-1.62038	0.107684	1.26684	1.26542	-0.266862	-0.296006	-1.05215	-0.813697	-0.648748	-0.65741	-1.34531	-1.32774	0.895308	0.501517	-1.96604	-1.67122	0.939021	0.782375	-1.6297	-1.26603	1.50093	0.572708	1.04407	0.450524	0.950039	1.06205	0.381886	0.361404	0.284392	0.514039	0.017973	-0.0940345	0.017973
YBL065W		243.218	207.706	119.447	-0.669149	0.126132	0.284664	0.195887	1.49429	1.26367	-1.20969	0.06008	0.0899243	0.179268	2.18267	1.7144		0.138475	0.710399	0.273024	0.17276	0.330845	-0.126495	-0.689411	-0.0678172	0.26122	-0.273562	-1.16905	-0.206157	-0.478735	-1.14941	-1.20867	-0.0222874	-0.114441	-0.858424	-0.855287					1.47227	1.44137	0.240577	0.0696255	0.584862	0.47964
YBL066C	SEF1	231.609	174.503	134.441	0.185073	0.151582	-0.431504	0.136879	0.39224	0.483853	-0.0119226	0.0934836	-0.789198	0.0777336	0.37161	0.52764	-1.01323	-0.44042	0.0618154	-0.382763	-0.273878	0.0735681	0.245322	-0.506554	-0.658019	-0.115812	0.156939	-0.935585	-0.174656	-0.0873531	-0.648125	-0.970752	0.00520524	0.243628	-0.384974	-0.644023	1.0013	1.10671	0.224029	1.09096	0.309794	0.910403	0.384141	0.18938	0.541913	0.429031	0.686374	0.0857656	0.686374
YBL067C	UBP13	130.103	78.7711	45.1756	-0.0636873	-0.270422	0.0541288	-0.100267	-0.0103659	-0.353252	-0.360728	-0.46041	-0.193065	-0.330318	-0.290017	-0.746306	-0.204885	-0.865192	-0.703442	-0.744163	-0.318871	-0.0176995	-0.264492	-0.016021	-0.717474	-0.249561	-0.433339	-0.309287	0.632059	-0.313198	-0.320531		0.709269	0.0370061	-0.0755734		-0.155842	-0.255524	0.0118199	-0.125433	0.413425	-0.00214358	0.398603	0.231862	-0.357766	0.293266	-0.0139635	0.401605	-0.0139635
YBL068W	PRS4	77.9767	49.4388	26.7634	-0.125487	-0.53875	0.306598	-0.176823	-0.232439	-0.654703	-0.447382	-0.8126	0.11685	-0.462048	-0.654963	-1.20507	-1.02197	-0.220075	-0.697297	-0.245007	-0.050148	0.0746155	-0.0651448	0.893538	-0.362375	-0.114277	-0.202529	0.85201	-0.581118	-0.296648	-0.245018	-0.98581	-0.349536	0.0521474	-0.00425411	-0.657395	0.574585	0.209367	1.13882	0.559919	0.0423338	-0.960061	0.312227	0.188892	-0.198275	0.041528	-2.09888	-1.09648	-2.09888
YBL068W-A
YBL069W	AST1	118.769	102.969	60.5705	-0.47729	0.315639	0.586081	0.15446	0.265223	-0.322581	-0.94067	0.308815	0.459926	0.107985	0.162874	-0.69963	0.456233	0.836745	-0.213526	1.0439	0.167571	0.22891	0.519756	0.753179	-0.0746739	0.111838	0.474688	0.672804	1.74971	2.14267	-1.18173	0.522189	1.6847	2.28384	-0.888942	0.681686	-1.3969	-0.147418	0.00369278	-0.348248	0.3764	-1.74353	0.242245	0.117073	1.36363	0.080375	-1.74722	0.372707	-1.74722
YBL070C		43.1247	25.7967	9.33826	-0.40826	-0.692053	0.163715		0.143048		-0.843879	-1.01381	-0.0585447		-0.0379029			1.27214	0.488456	1.38885	0.265345	0.807331			0.0545268	0.959495			-0.0594802	0.93399			0.105726	1.17804							-0.526359		0.210818	-0.152163
YBL071C		40.5029	41.3997	11.8461	-0.788513	1.15997	0.584511	0.55696	-0.623025	-0.06767	-1.37706	1.41703	0.457998	0.800559	-1.29684	-0.311694		0.245984	0.914811	0.672966	0.238939	1.19714			0.0196341	1.53075			-1.47544	0.227902		-1.18098	-1.13006	0.53205		-0.830704					-2.21165	-0.98466	0.219305	-0.333607
YBL071C-B
YBL071W-A	KTI11	46.9676	35.854	18.4875	0.21086	0.105478	0.195951	0.735304	-0.762772	-0.416054	0.0242361	0.0329709	-0.0189733	1.10743	-1.52649	-0.841882	-0.0551825	1.4561	0.64906	1.53591	0.787296	1.016	0.685352	0.92436	0.74425	1.26529	0.666421	0.891363	-0.79238	0.230231	0.0722097	-0.00531546	-0.533916	0.53418	0.295356	0.21327	0.0794185	0.0881533	0.0362092	1.16262	-2.17555	-2.37779	0.0430465	-0.249292	0.371064	0.0329973	-2.414	-2.21176	-2.414
YBL072C	RPS8A	219.117	259.639	132.042	1.1808	2.12878	3.01238	1.75086	0.773939	0.534934	1.38426	2.68863	3.43829	2.85489	0.998878	0.605376	1.687	1.49105	1.25991	1.42387	2.265	1.8411	2.18625	2.09234	2.69693	2.47445	2.4042	2.3826	0.350905	0.87421	0.855857	1.62164	0.463892	1.12335	1.03548	1.65799	-0.302744	1.00162	1.75129	1.16788	-0.261036	-0.818489	-0.431933	-0.633348	1.36872	-0.290264	-2.56978	-2.01232	-2.56978
YBL073W		94.8245	73.2224	37.5539	1.23669	1.16155	1.78095	1.49982	-0.291383	0.266424	1.46263	1.41911	1.92667	2.42292	-0.75183	0.196745	-0.665325	0.71192	0.282318	0.594657	1.65214	1.23412	1.26133	1.14093	1.88708	1.58493	1.3333	1.16787	-0.118567	0.392674		-1.05793	0.0541572	0.682797		-0.721437	2.12796	2.08443	2.59199	3.08824	-1.03415	-0.397911	-0.234941	-0.350818		-0.0269421	-2.9899	-3.62614	-2.9899
YBL074C	AAR2	173.162	112.274	63.199	-0.154003	0.79886	0.704276	0.00997087	0.344477	-0.325442	-0.487366	0.943058	0.605015	-0.140634	0.293117	-0.703984	-0.616333	-0.217902	-0.536307	-0.313428	0.273348	0.241198	0.163691	0.777855	0.0651029	0.129845	0.0624246	0.704309	0.401131	0.261594	-0.625818	-0.397996	0.507726	0.562874	-0.363906	-0.135425	0.128967	1.55939	1.22135	0.475699	0.829425	-0.390556	0.208245	0.111353	0.42633	0.0735455	-1.6119	-0.391923	-1.6119
YBL075C	SSA3	100.374	83.4635	258.277	0.269654	-0.249779	-0.105926	-0.079552	-0.158195	-0.361671	0.106675	-0.433316	-0.389539	-0.294675	-0.532954	-0.759119	-0.271409	-1.04903	-1.01282	-1.22944	-0.236699	-0.234382	-0.54522	-0.298887	-0.60889	-0.567103	-0.758375	-0.670442	-0.440652	-0.632691	-1.36597		-0.226944	-0.255293	-1.06295		0.378083	-0.161907	-0.118131	-0.023266	0.479861	0.47032	0.37219	0.332721	0.304578	0.371555	0.588451	0.597992	0.588451
YBL076C	ILS1	141.232	113.899	69.6886	0.744265	-0.277232	0.465273	0.547854	0.269182	0.210361	0.772163	-0.469349	0.31163	0.784891	0.16938	0.111426	-0.615455	0.123585	-0.380494	-0.193598	0.515043	0.73072	0.687662	0.663072	0.384486	0.847223	0.669095	0.557758	0.310192	0.619352	-0.0710386	-0.0544685	0.428359	0.89018	0.160064	0.169623	1.38762	0.146106	0.927084	1.40035	0.549874	0.305024	0.130557	-0.116503	0.509031	0.105314	-0.62206	-0.37721	-0.62206
YBL077W		476.577	332.619	176.042	-0.222702	1.28315	1.3085	0.225558	-0.216969	0.270462	-0.583695	1.5787	1.34672	0.230323	-0.629541	0.202891	0.985698	1.04089	-0.0286474	1.00751	0.609438	0.991558		1.19534	0.509222	1.22947		1.23734	2.02074	1.98492		1.12908	1.92125	2.13952		1.22059	-1.56939	0.593002	0.361018	-0.755375	-0.600893	-0.804619	0.100216	-0.237915		-0.042002	-1.16564	-0.961911	-1.16564
YBL078C	ATG8	445.995	245.757	116.452	-0.263511	1.38476	1.45896	0.425717	0.835331	1.66041	-0.640915	1.71207	1.53142	0.574732	1.09977	2.31817	-0.24185	1.43234	2.15281	1.53403	0.236912	0.300567			0.0169548	0.216848			0.949263	0.322635		-1.05295	0.986111	0.618719		-0.717016	-0.399066	1.95392	1.77327	0.816581	-1.05304	0.78414	0.219957	0.0837191			-0.98913	-2.82631	-0.98913
YBL079W	NUP170	172.971	134.195	117.126	0.195195	0.517524	0.32454	0.207714	0.57507	0.135394	0.00227003	0.573795	0.138875	0.199618	0.672065	-0.00266154	-0.123874	-0.630382	-0.0518531	-0.284706	0.550493	0.564894	0.237262	-0.037131	0.431331	0.604211	0.147608	-0.33624	0.443551	0.0295305	0.314137	-0.0513805	0.544748	0.350563	0.523848	0.172365	0.126144	0.697669	0.262749	0.323493	0.723918	0.282045	0.119162	-0.0393167	-0.37624	0.299109	0.0192957	0.461169	0.0192957
YBL080C	PET112	90.8889	57.8772	34.4971	-0.936535	-0.133043	-0.268769	-0.291819	-0.203053	-0.373757	-1.58461	-0.280096	-0.589434	-0.659918	-0.606672	-0.777511	-0.972809	-0.482147	-0.862394	-0.908062	-0.718319	-0.600308	-0.575398	-0.696355	-1.24532	-1.10336	-0.793317	-1.17792	-0.702774	-0.435211	-1.40084	-0.969427	-0.455712	-0.0746218	-1.09588	-0.642847	-0.611804	0.692713	0.383375	0.312892	0.255722	0.130551	0.526997	0.503048	0.302566	0.481562	-0.252824	-0.127652	-0.252824
YBL081W		20.6097	11.4295	8.07978	-0.0409534	-0.352779	0.362723	-0.203634	0.0231074	-0.323275	-0.328851	-0.568507	0.185745	-0.50818	-0.235008	-0.700686		-0.970696	-0.82467	-1.0627	-0.298141	0.776402	-0.570263	0.734991	-0.690081	0.914169	-0.787371	0.649582	0.267698	0.700097	0.171294	0.0988066	0.391272	0.964053	0.388938	0.305729					0.589662	0.362016	0.39194	-0.137767	-1.17631	0.0854089
YBL082C	ALG3	28.3656	26.7514	16.4481	-0.395227	0.217782	-0.00363555	-0.248991	-0.627321	-0.810736	-0.825604	0.180374	-0.263973	-0.586226	-1.3039	-1.44253	-0.891339	-0.455747	-0.95002	-1.11237	-0.309933	-0.599207	-0.360174	-0.0396672	-0.705663	-1.10174	-0.544123	-0.339478	-1.61439	-1.44479	-1.40792	-1.03097	-1.25133	-0.998266	-1.10257	-0.6975	0.0657345	1.07171	0.627365	0.305113	-0.353876	-0.330154	0.39573	0.502535	0.558448	0.299811	-0.957519	-0.981241	-0.957519
YBL083C		19.0353	13.9989	6.3456	-0.241328	-0.239746	0.316357	0.139286	-0.842553	-0.503841	-0.609812	-0.420147	0.128829	0.0818757	-1.6576	-0.975479	-1.43529	0.513343	-0.165473	-0.0659152	-0.805862	-0.702795		0.133285	-1.361	-1.25355		-0.118658	-1.86845	-1.61795			-1.47306	-1.15669			0.82548	1.01514	1.56412	1.51717	-1.49213	-0.909564	0.555137	0.550752		0.251943	-2.47368	-3.05625	-2.47368
YBL084C	CDC27
YBL085W	BOI1				1.5203	1.64533	2.00125				1.8603	2.05408	2.1971					0.280663	0.517244	-0.475531	1.67756	1.77561	0.0322645		1.92067	2.37847	-0.0897452		1.90156	1.39589	-0.0404096	2.09208	1.81723	1.60063	0.188992	2.07573							-0.243111	-0.602864	-0.278737
YBL086C		168.914	102.789	56.2103	-1.11601	-1.41237	-0.0740162	0.871806	0.283436	0.228767	-1.83627	-1.95925	-0.350368	1.34231	0.192805	0.139438	-0.558157	-0.509806	-0.286804	-0.90281	-0.940738	0.0932392	-0.282443	-0.0825656	-1.53923	-0.0869843	-0.454123	-0.394249	0.0625359	0.0601252	-0.652538	-0.74661	0.212216	0.378553	-0.389142	-0.444988	-1.27811	-1.4011	0.207788	1.90047	0.479609	1.04225	0.59849	0.180223	-0.0649812	0.311684	0.83446	0.271821	0.83446
YBL087C	RPL23A	555.283	541.378	293.287	1.5193	1.93405	2.20973	1.37426	0.634533	0.462694	1.8589	2.43303	2.45302	2.20687	0.769783	0.495438	2.1042	1.65941	1.1865	1.28449	1.77606	1.37787	1.86722	1.8334	2.05084	1.7956	2.03482	2.05199	2.04412	2.50707	2.16875	2.56157	1.94165	2.61723	2.27546	2.49262	-0.245296	0.328834	0.34882	0.102674	-0.416719	-0.789048	-0.274773	-0.417731	-0.240639	-0.218597	-1.13787	-0.765539	-1.13787
YBL088C	TEL1	80.0918	55.3749	36.8023	-0.501775	-0.606213	-0.286331	-0.206348	0.384859	0.180301	-0.975003	-0.901148	-0.610993	-0.512851	0.359479	0.0656791	-0.925733	-1.39588	-2.09353	-0.926594	-0.239445	-0.216322	-0.100382	0.110541	-0.612517	-0.540636	-0.243327	-0.147697	-0.0857711	0.0509377	-0.816704	-0.551705	0.0827803	0.370148	-0.544191	-0.271915	-0.04927	0.0245852	0.31474	0.412882	2.45301	0.992273	0.373073	0.324314	0.300864	0.258238	0.677533	2.13827	0.677533
YBL089W	AVT5
YBL090W	MRP21	309.699	188.455	97.387	0.398277	-0.275072	0.15569	-0.244723	-0.400876	0.246718	0.287027	-0.466514	-0.068396	-0.578881	-0.931765	0.166756	0.269792	1.4609	1.05175	1.03761	-0.330217	0.141931	-0.199977	0.19124	-0.732467	-0.0156286	-0.358642	-0.0446622	2.00164	1.71423	-0.325233	0.617031	1.90457	1.89186	-0.0800141	0.765904	0.0172347	-0.736306	-0.338188	-0.848673	-1.98351	-0.870852	0.40225	0.157559	-0.278628	0.235902	-0.532664	-1.64533	-0.532664
YBL091C	MAP2	51.0081	22.9153	13.2015	-0.58513	-0.135032	-0.554132	-0.116742	0.633158	-0.144815	-1.09188	-0.282707	-0.939728	-0.358666	0.767523	-0.429097	-0.799296	-0.501016	-0.422608	-0.342975	0.0615189	0.016292	-0.273822	-0.142867	-0.214815	-0.199748	-0.444142	-0.47124	-0.28533	-0.0330529	-0.358731		-0.0913854	0.293306	-0.111652		-0.292586	0.516589	-0.140432	0.44063	1.19013	-0.0861226	0.276334	0.21604	-0.33249	0.328373	0.0543094	1.33056	0.0543094
YBL091C-A	SCS22	1103.03	640.063	254.669	1.85564	2.91757	1.61211	0.558021	1.31965	0.396763	2.3305	3.72394	1.71941	0.802385	1.89568	0.395102	2.04758	2.53793	1.97549	2.89816	1.5337	1.53934	0.806155	1.07936	1.73057	2.03223	0.806289	1.08927	3.47174	3.73543	-0.0907608	2.79859	3.18762	3.74103	0.141437	2.7031	0.282922	1.67636	-0.328171	-1.24519	-0.0798054	-2.50306	-0.196869	-0.492889	0.664853	-0.00990337	-2.17489	0.248366	-2.17489
YBL092W	RPL32	504.744	500.74	209.914	2.91092	1.9402	2.72593	2.42543	1.26001	1.59403	3.81019	2.44111	3.08667	4.01559	1.79767	2.21716	1.81592	2.26381	1.63894	2.46423	2.21647	1.30301	2.9752	2.59297	2.63281	1.6859	3.31768	3.02179	0.892302		1.98419		0.936398		2.10116		1.99427	0.625194	1.27076	2.19968	0.15873	-0.247078	-0.416335	-0.382887	1.21652	-0.428822	-1.51784	-1.11203	-1.51784
YBL093C	ROX3	590.706	408.142	274.882	0.217435	-0.337703	-0.482766	0.0264919	0.0248767	-0.00381468	0.0334545	-0.548719	-0.852123	-0.112207	-0.232101	-0.214516	1.1321	1.09599	0.921368	1.2223	0.320749	0.471668	-0.0846123	0.624665	0.127739	0.467591	-0.225069	0.508721	2.21865	3.3687	0.916	1.03844	2.09397	3.40552	1.09229	1.14011	-1.09864	-1.68082	-1.98422	-1.2443	-1.15347	-1.43681	0.193009	0.00407695	-1.31736	0.115944	0.547407	0.830751	0.547407
YBL094C		270.79	148.56	102.673	0.198019	0.717907	1.27984	0.0567305	0.913049	0.482006	0.00622993	0.836804	1.31154	-0.0601759	1.22749	0.524829		0.693955	0.914986	1.12945	0.473443	0.780174	0.139587	0.415171	0.329514	0.919697	0.0345163	0.241245	1.04029	2.12893	-0.239754	-0.0822991	1.06555	2.27127	0.000718136	0.14491					0.3125	-0.604625	0.143929	-0.139523	0.0337982	0.173925
YBL095W		248.083	151.748	80.7661	0.53796	0.654066	0.936337	-0.204011	0.728374	0.515456	0.482887	0.753011	0.889878	-0.50883	0.923997	0.575734	0.393404	0.465886	0.386679	0.334022	0.577142	0.416792	0.533424	0.0973511	0.466545	0.387173	0.490513	-0.164537	1.41139	2.1822	-0.274939	0.654293	1.38944	2.32001	-0.0325131	0.798992	0.0894833	0.359607	0.496474	-0.902234	0.537318	0.241713	0.110597	0.0296199	0.523026	0.261888	-0.254761	0.0408446	-0.254761
YBL096C		301.654	191.508	104.646	1.25517	0.216765	1.37669	-0.162896	-0.637233	0.766363	1.48854	0.179038	1.43043	-0.438082	-1.32018	0.957576	1.06265	2.02443	1.26434	1.65594	0.150202	0.300048	0.71106	0.205316	-0.0976267	0.216088	0.696185	-0.0266912	1.84106	1.65704	0.140095	1.27781	1.76443	1.83955	0.359472	1.35267	0.425886	-0.883614	0.367777	-1.50073	-2.58452	-0.698365	0.247828	0.0839605	0.336713	0.232007	-1.06614	-2.9523	-1.06614
YBL097W	BRN1	32.2328			0.318392	-0.77792	0.814316				0.175015	-1.12652	0.740092							-1.76058
YBL098W	BNA4	62.0439	25.6713	13.4816	-0.0814501	-1.78212	-0.977401	0.706946	-0.0566348	-0.738149	-0.385634	-2.44457	-1.45931	1.05864	-0.366053	-1.33206		-2.5176		-1.31922	-0.372449	-1.1666	-1.10494		-0.788274	-1.93324	-1.40644		-1.87843	-2.11251			-1.48177	-1.60916								-0.012844	0.415824	0.766637
YBL099W	ATP1	271.315	131.898	76.5286	0.26232	1.40695	1.10664	1.19226	2.39978	1.82786	0.0963914	1.74119	1.09893	1.8937	3.67072	2.57301	0.718632	0.64328	0.742877	0.382687	1.0388	1.29167	0.351471	1.38229	1.0766	1.66928	0.279842	1.47603	0.699631	0.473974	-0.517179	0.0239191	0.768244	0.757177	-0.2613	0.23923	-0.622241	1.02256	0.380301	1.17507	2.92785	2.19032	-0.0377956	-0.377609	0.541142	-0.0937428	1.81002	2.54755	1.81002
YBL100C		473.268	285.322	115.13	2.12035	0.577962	1.60326	0.837468	1.48622	2.17109	2.70168	0.653122	1.70856	1.28322	2.16941	3.09536	0.181858	1.7331	2.2875	2.43672	1.06742	0.75968	0.630532	0.723492	1.11441	0.889663	0.602948	0.634901	1.93342	1.78402	0.0538881	0.308345	1.84504	1.95572	0.278052	0.491796	2.51982	0.471264	1.5267	1.10137	-0.118084	0.658643	-0.0469924	-0.129983	0.324896	0.0885914	-0.868055	-1.64478	-0.868055
YBL100W-C
YBL101C	ECM21	195.661	132.74	81.1464	-0.0138244	-0.127598	0.237772	0.160318	1.05365	0.177954	-0.290811	-0.27295	0.0323627	0.118065	1.45855	0.0621082	-0.517487	-0.220075	-0.471475	0.0554178	0.00955349	-0.0170414	0.50749	0.130133	-0.283484	-0.248597	0.460486	-0.122683	-0.0876893	0.0563862	-0.691663	-0.415702	0.0811062	0.375133	-0.426094	-0.151147	0.226676	0.244537	0.54985	0.635551	1.93002	0.00669032	0.293037	0.231556	0.88658	0.252815	-0.543159	1.38017	-0.543159
YBL102W	SFT2	197.64	129.459	83.0023	-0.0077482	0.201056	1.08173	-0.201835	0.563427	0.498038	-0.282291	0.158421	1.06835	-0.505085	0.65293	0.549227	-0.801457	0.944133	0.867729	0.854433	0.48118	0.0703484	-0.0633037	0.515497	0.339738	-0.12053	-0.200397	0.369339	0.396256	0.411344	-0.835974	-0.657175	0.503472	0.699878	-0.56239	-0.365571	0.519165	0.959877	1.86981	0.296371	-0.214799	-0.305207	0.141442	0.190878	0.361993	0.146158	-2.17501	-2.08461	-2.17501
YBL103C	RTG3	86.7216	46.3374	24.3967	-0.580185	0.818072	-0.0599921	0.106707	0.0159041	-0.0839536	-1.08495	0.968275	-0.333153	0.0258172	-0.246846	-0.336475	-0.365877	-0.798431	-1.35629	-0.710302	0.076311	0.00816426	0.0815323	0.483829	-0.195268	-0.211659	-0.0327013	0.328906	0.274541	0.683564	-1.08913	-0.400861	0.397244	0.948927	-0.801486	-0.137968	-0.719072	1.33415	0.0327236	0.391694	1.10944	0.373827	0.271579	0.219823	0.768785	0.154923	0.341103	1.07672	0.341103
YBL104C		71.8143	55.9075	32.358	0.120222	-0.24974	0.0038359	-0.0971658	0.371549	-0.483442	-0.102855	-0.433265	-0.254802	-0.324982	0.337606	-0.944436	-1.37087	-1.41663	-1.86998	-1.92252	-0.142985	-0.366809	-0.36032	0.107505	-0.485053	-0.76117	-0.544293	-0.151573	-0.622287	-0.697379	-1.46334	-1.07716	-0.385467	-0.314475	-1.15492	-0.73851	1.26802	0.937608	1.11607	1.04589	2.20758	0.978089	0.342068	0.394361	0.610628	0.259078	-0.137983	1.09151	-0.137983
YBL105C	PKC1	181.663	94.3098	58.7441	0.170694	0.598537	-0.681716	-0.418168	0.509162	0.604371	-0.0320843	0.680128	-1.09634	-0.877324	0.563754	0.71105	-0.177087	-0.575474		0.0637355	0.201336	0.161829	-0.00225785	0.190493	-0.0300558	0.013532	-0.129716	-0.0456161	0.535704	0.599383	0.109231	0.0952451	0.625176	0.871911	0.330321	0.302566	0.145003	0.857215	-0.919255	-0.700237		0.647314	0.231392	0.148297	-0.460038	0.236109	1.56657		1.56657
YBL106C	SRO77	78.7663	61.2462	44.1024	-1.41341	1.19248	0.657656	-0.0957293	-0.166035	-0.510704	-2.25327	1.45969	0.547786	-0.322511	-0.545837	-0.985924	-1.45803	-0.493468		-0.753004	-0.409681	-0.839196	-0.732073	-0.54481	-0.837472	-1.45344	-0.974719	-0.984429	-1.15627	-1.13174		-0.75322	-0.851499	-0.711868		-0.450858	-0.795249	2.91772	2.00581	1.13551		-0.232921	0.427792	0.614242		0.439619	-2.23873		-2.23873
YBL107C		123.266	80.8176	44.8008	-0.39998	-0.369525	-1.17342	-0.172417	-0.488216	-0.219399	-0.832269	-0.590486	-1.69992	-0.454465	-1.0753	-0.542603	-0.164177	-0.505994	-0.108479	-0.288581	0.0641723	0.100452	-0.106283		-0.211309	-0.0764142	-0.250159		0.478012	0.770877	-0.231423	0.252883	0.574824	1.02881	0.00858633	0.442547	-0.668093	-0.42631	-1.53575	-0.290288	-0.966816	-0.254022	0.275481	0.176866	-0.258746		1.28172	0.568929	1.28172
YBL107W-A
YBL108C-A
YBL108W
YBL109W
YBL111C
YBL112C
YBL113C
YBL113W-A
YBR001C	NTH2	127.769	80.5407	56.4283	0.560243	-0.537664	-0.143023	-0.376854	1.08454	0.648969	0.514132	-0.811175	-0.435077	-0.806237	1.50931	0.778921	-0.436484	-1.0523	-0.354251	-0.508311	-0.325944	-0.121866	-0.605356		-0.72682	-0.402214	-0.828002		0.422104	0.500117			0.526031	0.781095			0.950616	-0.37469	0.00140719	-0.369753	1.86356	1.28723	0.400876	0.280348			1.28582	1.86215	1.28582
YBR002C	RER2	104.224	72.6231	37.2507	0.49445	0.349214	0.758739	0.464665	0.642046	0.508637	0.421878	0.352883	0.671869	0.641749	0.782129	0.565356	0.584024	0.598544	0.438482	0.455561	0.602302	0.562497	0.613791	0.299974	0.499792	0.600699	0.583564	0.0941655	0.891094	1.11376	0.227152	0.838655	0.935344	1.34251	0.441694	0.962704	-0.162146	-0.23114	0.0878459	0.0577252	0.343647	0.109796	0.10251	-0.0382011	0.14187	0.205808	0.0219498	0.255801	0.0219498
YBR003W	COQ1	184.034	98.0817	68.1212	-0.216202	-0.872139	-0.73615	-0.0906365	0.759746	0.659482	-0.574581	-1.25018	-1.16316	-0.313747	0.975553	0.79492	-0.854578	-0.00316563	0.502496	-0.529656	0.0504208	-0.502262	-0.501875	0.0460551	-0.22948	-0.959671	-0.708188	-0.23003	-0.54254	-0.361372	-1.40416	-1.48604	-0.315867	-0.00706794	-1.09902	-1.10159	0.279998	-0.395606	-0.308584	0.540831	0.473057	1.32458	0.279901	0.45741	0.390835	0.276085	1.63316	0.781641	1.63316
YBR004C	GPI18	88.3778	53.1543	33.0389	-0.566359	-0.314433	-0.0383156				-1.06556	-0.518176	-0.306544							-0.801132			-0.359765				-0.54365		-0.251911	-0.540579			-0.0622189	-0.171021
YBR005W	RCR1	761.793	573.002	323.059	-0.543741	-0.764098	-0.118878		0.0432766	0.0242261	-1.03385	-1.10838	-0.405438		-0.201863	-0.171842		1.71447	0.798165	1.26669	-0.378114	0.566643	-0.532839	-0.616474	-0.795759	0.606773	-0.74404	-1.07593	3.18497	1.46768		0.420223	2.93733	1.6663		0.591142					-1.00003	-1.43853	0.417645	-0.0401305		0.459453
YBR006W	UGA2	182.71	111.535	107.119	0.579846	-0.773795	0.0702927	-0.821662	0.554708	0.419051	0.541619	-1.1211	-0.173224	-1.57161	0.638603	0.429021	-0.692881	-0.08185	0.117975	0.915664	-0.552129	-0.616532	-0.863138	-0.514605	-1.02571	-1.12713	-1.12647	-0.945864	1.45768	1.15042	-1.12342	-0.871204	1.42984	1.37604	-0.833869	-0.555626	1.2345	-0.428224	0.519657	-0.878728	0.520628	-0.486643	0.473579	0.510599	-0.292602	0.431259	-1.0063	0.000970798	-1.0063
YBR007C	DSF2	106.357	77.5725	49.7882	0.0479571	-0.106886	-0.601055	-0.311527	-0.178775	-0.483263	-0.204183	-0.245764	-0.997328	-0.69383	-0.566774	-0.944163	-0.319498	-0.939199	-1.49594	-0.753695	-0.333998	-0.195012	-0.38287	0.0260992	-0.737464	-0.509407	-0.570401	-0.255509	0.757024	0.466376	-0.781478		0.818334	0.750225	-0.510921		0.115315	0.0737342	-0.67783	-0.374332	0.929161	-0.190468	0.403465	0.314395	-0.0594798	0.281609	0.487363	1.60699	0.487363
YBR008C	FLR1	74.3016	55.0095	36.5458	0.184637	-0.559211	-0.349054	0.865514	0.41963	-0.100272	-0.0125336	-0.839455	-0.687987	1.33148	0.41662	-0.36131			-0.347773	-2.26566	0.153244	-0.0688868	0.268067		-0.093606	-0.324575	0.183275		-0.5973	-0.744491	-1.35047		-0.363659	-0.357577	-1.04831						0.764393	1.90435	0.24685	0.255688	1.23158
YBR009C	HHF1	2436.87	1815.69	980.121	1.55646	2.12961	2.45739	2.10916	0.784877	1.89081	1.91101	2.68972	2.75703	3.47139	1.01685	2.66882	3.35069	2.39555	2.50523	3.0316	2.28765	2.0822	2.39868	2.56629	2.72687	2.82778	2.65016	2.98773	3.97632	3.36981	2.58147	3.40481	3.62799	3.40653	2.66526	3.24141	-1.43969	-0.660977	-0.593662	0.120699	-1.48838	-0.362776	-0.439214	-0.745575	-0.0151027	-0.42144	0.230886	-0.89472	0.230886
YBR010W	HHT1	4905.69	3330.46	1816.01	1.81224	2.55596	2.48688	2.2369	1.24613	2.24335	2.26965	3.24932	2.79323	3.6912	1.77485	3.20532	3.52659	3.78365	3.3337	3.65015	2.28049	2.21847	2.54529	2.77402	2.7174	3.02747	2.81991	3.25295	4.27998	3.83815	3.12221	3.72525	3.89301	3.83501	3.17597	3.52596	-1.25693	-0.277271	-0.733355	0.16461	-1.55885	-0.444827	-0.436912	-0.809003	-0.356061	-0.478933	0.288527	-0.825496	0.288527
YBR011C	IPP1	204.657	161.828	78.3021	1.12036	1.85906	1.11062	0.395715	1.19776	0.386908	1.29952	2.3346	1.10381	0.523108	1.69537	0.380104	0.728468	1.41797	1.61283	1.21392	1.12762	0.718563	0.779245	0.805583	1.19396	0.829408	0.775132	0.739712	1.03425	1.29509	0.275363	0.982577	1.06028	1.5084	0.487227	1.0905	0.571048	1.60614	0.375345	-0.20536	0.0825354	-0.833813	-0.066343	-0.110845	0.287905	0.0658712	-1.20916	-0.29281	-1.20916
YBR012C		77.9527	51.6892	25.8155	-0.129034	0.405769	0.310087	0.176015	0.146058	-0.0298597	-0.452355	0.427113	0.121133	0.145075	-0.0329563	-0.254153		-0.311584	0.569872	0.227597	-0.339889	-0.647715	-1.15549	-0.396844	-0.745248	-1.17283	-1.46496	-0.79551	-3.39186	-3.03144		-2.76161	-2.80262	-2.44987		-2.23427					-0.602828	-0.481749	0.405359	0.525114		0.398666
YBR013C		425.075	249.984	104.236	0.900017	0.403787	0.678597	0.538185	1.09154	1.19814	0.990554	0.424512	0.573492	0.768255	1.5208	1.61468		0.999218	1.63167	2.01153			0.512054				0.46577				-1.35797				-1.0554						-0.110866	-0.396855			1.52117
YBR014C		65.7391	38.2014	23.764	-0.215966	1.26408	0.578862	-0.44093	0.674335	0.0146141	-0.574249	1.55368	0.451064	-0.916491	0.835192	-0.18647	-1.14712	-0.964658		-0.187898	-0.317054	-0.104997	-0.670772	-0.205908	-0.715073	-0.377493	-0.903743	-0.551729	-0.00302079	0.17226		-0.896488	0.155001	0.481144		-0.578078	0.572873	2.7008	1.59819	0.230631		0.00142782	0.398019	0.272496		0.345821	-1.59676		-1.59676
YBR015C	MNN2	252.877	169.385	92.0962	-0.417539	-0.535492	0.227693		0.152227	0.242647	-0.856889	-0.808324	0.0199904		-0.0228182	0.160561	0.364807	0.204703	-0.0574868	-0.634293	0.389571	0.394151	0.517208	0.086383	0.218683	0.353992	0.471738	-0.178541	-0.343612	-0.254138	0.260579	-0.253839	-0.142251	0.0910389	0.473265	-0.00741528	-1.2217	-1.17313	-0.344817		0.0346686	0.794853	0.170888	0.0401588	-0.00152702	0.264924	1.13967	0.379485	1.13967
YBR016W		216.571	200.169	132.49	0.415518	-0.351918	0.306829	0.44945	0.496552	0.191529	0.311202	-0.567376	0.117133	0.61557	0.543031	0.082767	1.20331	1.94483	1.57874	1.37116	0.756352	0.22425	0.671583	0.879534	0.703358	0.105008	0.650478	0.83413	1.98461	1.64481	0.520484	1.00321	1.88971	1.82836	0.718736	1.10882	-0.892109	-1.77069	-1.08618	-0.587741	-1.03571	-1.28839	0.0529931	0.119242	-0.0682579	0.0454039	-0.202215	0.0504649	-0.202215
YBR017C	KAP104	121.847	85.1384	49.4162	0.216806	0.48296	0.243967	0.403712	0.368982	-0.115493	0.0325733	0.528428	0.0399673	0.536869	0.333387	-0.384473		-0.667524	-0.861439	-0.928803	0.107993	0.355995	0.287289	0.166867	-0.153403	0.298076	0.20553	-0.0757811	0.82008	0.923664	0.0992302		0.873366	1.16859	0.320876						1.19483	0.54433	0.261396	0.057919	-0.115346	0.242648
YBR018C	GAL7	26.3331	18.8742	15.1067	-0.742149	-0.752198	-1.32981	-0.836759	0.934666	2.86582	-1.31205	-1.09276	-1.8919	-1.59759	1.26301	4.15263		-1.03144	1.5752	0.121173	-1.91715	-1.73081	-2.49533	-1.91638	-2.82949	-2.76006	-3.01628	-2.73561	-2.24379	-2.30318			-1.80064	-1.7836							-0.312195	4.03146	0.912339	1.02926		0.819228
YBR019C	GAL10	61.4885	35.3658	21.3179	0.0635786	-0.242409	-0.794983	-0.5631	0.56986	2.65686	-0.182279	-0.423643	-1.23538	-1.12671	0.663502	3.83463	-1.36689	-0.623525	1.08526	1.5894	-0.725324	-0.734639	-0.967161	-0.514952	-1.25457	-1.30021	-1.24691	-0.946307	-0.956593	-1.19767	-1.69983	-1.56352	-0.677233	-0.772182	-1.37827	-1.17039	1.18461	0.943248	0.131508	0.240184	-0.421754	2.24523	0.529249	0.565574	0.131361	0.431355	2.11372	-0.553262	2.11372
YBR020W	GAL1	61.8751	18.4908	26.9831	0.0924524	-0.756899	-0.849964	0.172329	0.961031	2.13105	-0.141793	-1.09893	-1.30287	0.138733	1.30634	3.03441	-0.908054	-0.695397	1.80391	1.04604	-0.242602	-0.0234414	-0.334775	0.190438	-0.61669	-0.257976	-0.514715	-0.0456868	-2.07124	-1.22954		-1.43145	-1.65004	-0.801338		-1.05311	0.766262	-0.190873	-0.394818	1.04679	-0.497571	1.98837	0.374088	0.234535		0.236125	2.38319	-0.102753	2.38319
YBR021W	FUR4	39.5153	31.2555	22.2435	0.49283	-0.0737397	0.2115	-0.0745295	0.0907273	-0.035675	0.419607	-0.202258	0.000113164	-0.286032	-0.123885	-0.263003	-1.07024	-0.890851	-1.41928	-0.0688662	0.0937386	0.391959	0.00348447	-0.0372909	-0.172239	0.35078	-0.123068	-0.336444	0.644532	0.647832	-2.11643	-1.21482	0.720156	0.916236	-1.77173	-0.86075	1.48984	0.867978	1.07035	0.784203	1.2954	-0.194137	0.265977	0.0411791	1.64866	0.299153	-1.26449	0.22505	-1.26449
YBR022W	POA1	340.191	205.73	106.474	0.54985	0.480316	1.47439	-0.185035	-0.483768	-0.00143628	0.499559	0.524959	1.55036	-0.476177	-1.06799	-0.210897	-0.483639	1.03914	1.06169	0.661896	0.155771	0.258946	-0.217936	1.13709	-0.0902674	0.155854	-0.379435	1.16297	1.41406	1.25913	-0.659621	-0.109294	1.39177	1.4755	-0.395832	0.120938	0.983197	1.0086	2.034	0.00746153	-2.12968	-0.872792	0.246038	0.103092	0.0163968	-0.0258792	-2.90679	-4.16368	-2.90679
YBR023C	CHS3	419.806	279.478	134.365	1.09323	0.0935461	0.0445121	0.304532	0.483194	-0.246287	1.26148	0.01731	-0.20487	0.366211	0.52108	-0.583522		0.157104	-0.0573252	-0.465517	0.762968	0.493207	0.00140752	-0.351954	0.712102	0.499155	-0.125472	-0.738196	1.50818	1.07936	0.162767	0.100266	1.47391	1.31103	0.380885	0.307025					0.578405	-0.118006	0.0508662	-0.00594857	-0.506357	0.386242
YBR024W	SCO2	171.556	91.7206	69.2902	0.864116	-0.0369645	-0.0752832	-0.360353	-0.25809	-0.386963	0.940215	-0.15399	-0.351923	-0.777844	-0.697116	-0.79761	-0.543824	0.0747703	0.0136425	0.297535	-0.0509664	-0.136743	-0.591957	-0.276149	-0.363456	-0.424016	-0.812489	-0.64141	0.581124	1.00946	-1.22383	-0.485995	0.664816	1.24708	-0.928705	-0.213567	1.48404	0.389834	0.1919	-0.23402	-0.710758	-1.09514	0.31249	0.287273	0.116217	0.365262	-1.28705	-0.902659	-1.28705
YBR025C		83.8544	64.8538	38.7167	0.908554	1.10635	1.46537	0.999824	0.710095	1.01121	1.00252	1.34665	1.53928	1.56259	0.893959	1.3302	0.582445	0.377095	0.138979	0.00389306	1.52928	1.36947	1.24448	1.48443	1.72473	1.7833	1.31379	1.60644	0.611971	1.27189	1.85806	0.789286	0.691738	1.48718	1.98202	0.918864	0.42008	0.764207	0.956836	0.980143	0.754979	1.32631	-0.195449	-0.413823	-0.668231	-0.122012	0.369474	-0.201857	0.369474
YBR026C	ETR1	61.3317	39.4158	34.7105	0.265149	-0.62956	0.0118665	0.0733858	0.328901	0.475362	0.100358	-0.931792	-0.244944	-0.0315173	0.26752	0.514718	-1.17742	-0.180319	0.478789	-0.523988	-1.03892	-0.618073	-0.982683	-0.0377964	-1.66897	-1.12939	-1.26488	-0.337089	-0.327052	-0.516636	-0.731545	-1.76426	-0.127799	-0.149116	-0.463761	-1.34865	1.27777	0.245624	0.932472	1.1459	-0.211269	1.03871	0.630049	0.511316	-0.801123	0.299293	0.106233	-1.14374	0.106233
YBR027C		154.414	95.229	48.5438	0.36032	0.76484	1.33829	0.212716	-0.039421	0.460873	0.233804	0.898406	1.38329	0.208226	-0.337765	0.492667		-0.178342		-0.516222	0.547316	0.242484			0.427133	0.131729																1.00889	0.120184	0.110755
YBR028C		59.2488	39.8318	27.2884	0.330485	0.216842	-0.0410082	0.197956	-0.221814	0.512328	0.191971	0.17914	-0.30985	0.182828	-0.637502	0.570973	-0.157489	-0.921739	-0.725758	-0.911782	-0.572726	-0.167321	-0.223495	0.203501	-1.05293	-0.468827	-0.385871	-0.0290083	-0.323132	-0.779538	-1.17429	-0.443572	-0.124378	-0.389641	-0.88192	-0.175895	0.34946	0.336629	-0.15236	0.340317	0.0882566	1.48276	0.4802	0.301506	0.496048	0.232509	1.63512	0.240617	1.63512
YBR029C	CDS1	75.1766	71.047	47.6045	0.493517	0.349727	0.433913	0.152032	-0.0244112	0.0454315	0.420569	0.353556	0.273134	0.103807	-0.313098	-0.139571	-1.70188	-0.912743	-0.532928	-1.11826	0.348578	0.50046	0.719044	0.971954	0.164514	0.509785	0.70543	0.952129	-1.12531	-0.940749	-2.1779	-1.93678	-0.824486	-0.53713	-1.8298	-1.50184	2.12245	2.05543	1.97501	1.80568	0.219829	0.978688	0.184064	-0.00932477	2.53523	0.0198247	-0.996323	-1.75518	-0.996323
YBR030W		57.0446	54.9354	30.3024	-0.0691218	0.286395	-0.0710257	0.517297	-0.3876	-0.279102	-0.368348	0.27043	-0.346697	0.732312	-0.909947	-0.633461	0.0550304	-0.814132		-0.738808	-0.105768	0.0310509	0.255336	0.20598	-0.435873	-0.178119	0.168534	-0.0258428	-1.81885	-0.689121	-0.439495	-0.679461	-1.42977	-0.30692	-0.18793	-0.385361	-0.423378	0.2154	-0.401728	0.677281		0.105347	0.330105	0.20917	0.356464	0.231823	0.507074		0.507074
YBR031W	RPL4A	124.679	113.316	74.1833	2.39	1.56081	2.08294	1.42177	1.31776	1.22771	3.07977	1.94314	2.29738	2.28863	1.89257	1.65968		1.02144	1.17199	1.25539	2.19778	2.12851		1.98805	2.6081	2.89563		2.24946	0.454908	1.69332		0.929991	0.55466	1.87274		1.04381					0.720577	0.40429	-0.410325	-0.767128		-0.261401
YBR032W		1570.08	1274.92	350.608	-0.264766	1.41349	2.22291	-0.127089	0.0202606	0.226592	-0.642676	1.74978	2.4692	-0.37647	-0.239687	0.136128	1.15083	1.74756	1.22093	2.78283	0.752313	1.15086	1.21517	0.920759	0.698022	1.46293	1.27986	0.886765	2.28375	3.81286		1.65813	2.15079	3.81187		1.69039	-1.79351	0.59895	1.31837	-1.5273	-1.46062	-2.6467	0.0542913	-0.312066		0.033994	-3.96507	-2.77898	-3.96507
YBR033W		111.923	70.3014	55.6911	-0.0811028	-0.671841	-0.88447	-0.473603	0.0371027	0.272834	-0.385147	-0.987286	-1.34523	-0.97271	-0.212009	0.206501	-1.18541	-1.38473	-0.793546	-0.649088	-0.614672	-0.351352	0.0614437	-0.509695	-1.10835	-0.738519	-0.0559606	-0.939596	-0.141849	-0.114339	-1.50373		0.0338383	0.218939	-1.19306		0.800266	0.198127	-0.159817	0.212703	0.581537	0.855589	0.493682	0.387167	1.1371	0.4299	1.01541	0.741354	1.01541
YBR034C	HMT1	133.751	116.926	74.6881	1.3229	0.0824813	0.363644	0.400656	0.321178	0.261388	1.58351	0.00278698	0.186876	0.531611	0.254828	0.189081	0.659999	0.17731	-0.37527	0.873699	1.18579	1.06204	1.05387	0.946978	1.27083	1.33277	1.0931	0.92024	0.566379	1.41636	1.62682	1.15242	0.651947	1.61935	1.76363	1.24132	0.923508	-0.657212	-0.473123	-0.128388	0.630098	-0.684617	-0.0850401	-0.270724	-0.670525	0.0267374	-0.211494	1.10322	-0.211494
YBR035C	PDX3	266.546	213.327	151.902	0.0973353	1.59728	1.42076	0.496265	0.133195	0.778417	-0.134946	1.99102	1.48452	0.696123	-0.0540954	0.97592	0.502068	1.3511	1.05197	0.855359	0.828721	0.837375	0.310119	0.782426	0.79899	1.00352	0.231963	0.710146	1.66408	1.58343	0.341694	0.605569	1.60997	1.7722	0.549875	0.755727	-0.637014	1.48895	0.982457	0.194055	-1.10606	0.120562	0.0297312	-0.166148	-0.317911	0.0722803	-0.861895	-2.08852	-0.861895
YBR036C	CSG2	205.627	117.72	69.3706	0.764413	0.00333664	0.398339	0.360625	0.828943	0.652308	0.800413	-0.101093	0.229466	0.46273	1.08927	0.784001	0.0863101	0.523574	0.448521	0.332612	0.394673	0.541615	0.049149	0.628006	0.225425	0.570096	-0.0701958	0.512986	0.684973	0.726655	0.418802	-0.164193	0.755451	0.98835	0.622701	0.0721888	0.714103	-0.187403	0.143156	0.376419	0.640748	0.45139	0.169248	-0.028481	-0.692897	0.115019	0.308234	0.497593	0.308234
YBR037C	SCO1	190.072	127.731	102.549	0.954695	0.0444079	0.22353	-0.240232	0.384397	0.464294	1.06722	-0.0471857	0.0148809	-0.571154	0.35872	0.497873	-0.24532	0.6041	0.826011	0.237444	-0.10521	-0.187642	-0.245937	0.31949	-0.435135	-0.498607	-0.411856	0.119084	0.665192	0.324744	-1.25219	-0.339776	0.738187	0.620648	-0.955496	-0.0837263	1.31254	0.198134	0.260201	-0.325834	-0.467291	0.260429	0.329925	0.310965	0.543641	0.200407	0.000228079	-0.727492	0.000228079
YBR038W	CHS2	33.7899	31.9264	18.8969	0.0858071	-0.0496509	-0.228039	0.349899	0.495517	0.251994	-0.15111	-0.170641	-0.539437	0.444273	0.541331	0.174785	-1.4644	-1.51769	-0.95002	-1.67955	0.357334	0.172855	-0.0417736	0.227514	0.176084	0.0296896	-0.175469	0.0016506	-2.28587	-2.62936	-2.05532	-2.00952	-1.83736	-2.08201	-1.71402	-1.56643	1.31329	1.29376	0.924963	1.90867	1.49135	1.85433	0.18125	0.143165	1.53855	0.225863	0.929368	0.566387	0.929368
YBR039W	ATP3	229.404	135.021	84.9169	0.132296	-0.570438	0.929594	-0.159564	1.08007	1.22451	-0.0859256	-0.854192	0.8816	-0.432349	1.50195	1.6548	0.119978	0.566065	1.12314	1.22598	0.263535	0.326396	-0.10417	-0.0518473	0.0521358	0.254699	-0.247714	-0.355029	1.83614	1.72732	-0.250727	0.301025	1.76014	1.90384	-0.00964579	0.485296	-0.205904	-0.97417	0.761622	-0.552327	0.378818	0.428823	0.211399	0.0716967	-0.238068	0.303182	-0.332799	-0.382803	-0.332799
YBR040W	FIG1	31.4987	20.5854	12.5193	-0.732116	0.433724	-2.23844	-0.460824	-0.452279	-1.45409	-1.29798	0.463804	-3.00728	-0.950722	-1.01624	-2.42162			-1.99283	-1.81854	-1.51477	-1.49705	-2.25319		-2.29778	-2.4175	-2.73592			-1.82406				-1.34526							0.976587	-0.60308	0.783003	0.920452
YBR041W	FAT1	275.467	156.414	103.628	0.131642	0.227247	-0.652514	0.740536	0.25484	0.241334	-0.0868412	0.192797	-1.0605	1.11644	0.145812	0.158563	0.0889377	-0.110654	-0.249261	-0.137143	-0.21514	0.0177644	-0.314971	-0.464213	-0.5804	-0.19759	-0.491785	-0.881525	0.859803	1.36459	-0.582688	-0.0669985	0.908035	1.57198	-0.323171	0.158496	-0.175779	0.103859	-1.14943	1.0275	0.395073	0.295706	0.36526	0.215355	-0.168614	0.417312	1.44514	1.54451	1.44514
YBR042C		86.3397	54.7382	43.1725	0.255523	-0.407843	0.126183	0.242999	0.251838	-0.0699531	0.0868615	-0.64078	-0.104616	0.260332	0.140878	-0.315169		-0.932554	-0.866226	-0.898302	0.0682052	-0.187136	-0.305145		-0.205979	-0.497864	-0.480409		-1.36495	-1.08871	-0.941023	-2.35523	-1.03363	-0.672499	-0.661605	-1.87342					1.0071	0.583134	0.274185	0.310729	0.181196
YBR043C	QDR3	293.539	166.583	79.9986	-0.4172	-1.21012	0.115143	0.107557	0.275788	-0.111823	-0.856414	-1.6938	-0.118169	0.0272804	0.180236	-0.378888	0.534597	-0.211965	-0.297219	-0.395841	0.0522355	0.0574294	-0.319639	0.234533	-0.227082	-0.139462	-0.49719	0.0106132	0.175564	0.195473	-0.489118	-0.15492	0.310862	0.50238	-0.234797	0.0804236	-1.39101	-2.2284	-0.652766	-0.507317	0.477456	0.0169521	0.279318	0.196892	-0.262393	0.22392	0.669718	1.13022	0.669718
YBR044C	TCM62	193.206	106.837	65.458	-0.518774	0.13271	-0.490462	-0.208225	0.346384	-0.130595	-0.998838	0.0687134	-0.861571	-0.51608	0.296251	-0.407457	-0.00486342	-0.328263	-0.669149	-0.290525	-0.255341	-0.059443	-0.577394	0.183385	-0.633523	-0.310735	-0.795627	-0.0546916	0.592891	0.756829	-0.537917	-0.342388	0.675086	1.01596	-0.280886	-0.0860452	-0.993975	0.0735769	-0.856708	-0.511217	0.965401	-0.116931	0.378182	0.251292	-0.51474	0.238077	0.739776	1.82211	0.739776
YBR045C	GIP1	67.6705	46.2591	31.0853	-0.518285	-1.24909	-1.09753	-0.407006	-0.0566151		-0.998153	-1.74494	-1.60676	-0.858119	-0.366021			-2.13671	-1.84444	-1.81854	-1.25182	-1.1383	-1.85659		-1.9503	-1.89177	-2.27672		-2.08183	-1.82727			-1.65929	-1.34819							1.47842		0.698481	0.753466
YBR046C	ZTA1	151.69	103.103	81.1284	-0.0255896	-0.398366	-0.251123	0.0634694	0.323721	-0.253652	-0.307308	-0.628342	-0.567773	-0.0485804	0.259008	-0.594731	-0.863081	-0.12685	0.645307	-0.140275	-0.400215	-0.803276	0.429228	0.570951	-0.824965	-1.4008	0.369872	0.440141	-1.58322	-1.44359	-0.677594	-1.42544	-1.22412	-0.997171	-0.412807	-1.04778	0.555773	0.234739	0.295308	0.814501	-0.3863	-0.454456	0.424749	0.597522	0.782679	0.13081	-0.749764	-0.681608	-0.749764
YBR047W		107.732	76.0536	45.6437	-0.90556	-1.0639	-1.01133		-0.286847	-0.566159	-1.54118	-1.50187	-1.50096		-0.744375	-1.07032		-0.334486	0.392519	-0.548818	-1.3375	-0.409809	-1.3529		-2.06352	-0.824185	-1.69353		-1.32958	-0.852389	-1.99901		-1.00276	-0.456291	-1.66084						-1.13689	-0.5215	0.726022	0.414376	-0.0326939
YBR048W	RPS11B	172.321	127.989	83.7792	1.70901	1.93723	2.05697	1.59038	0.37726	0.685858	2.12491	2.43721	2.26549	2.57875	0.346992	0.83506	1.53633	0.377648	0.120141	0.5136	2.03654	1.68761	2.22816	1.82558	2.39504	2.24952	2.45273	2.04201	1.25322	1.4849	1.58116	1.2911	1.25139	1.68206	1.72051	1.36447	0.588575	0.900879	0.729161	1.04242	0.226851	0.32146	-0.3585	-0.561906	0.732221	-0.216433	-0.407701	-0.50231	-0.407701
YBR049C	REB1	70.2086	51.885	36.144	-0.0791601	0.163129	-0.0571956	0.238897	0.390372	-0.214197	-0.382423	0.10864	-0.32972	0.253275	0.368539	-0.534686	0.335923	-1.04636	-1.21845	-1.07454	-0.371515	0.303411	0.748841	0.0238555	-0.787039	0.221016	0.73993	-0.258374	-0.193046	-0.507205	-0.138984	0.440593	-0.0108447	-0.140488	0.0958915	0.60923	-0.718346	-0.227283	-0.665643	-0.0826477	1.58699	0.539854	0.415524	0.0823951	0.644038	0.28223	1.2055	2.25263	1.2055
YBR050C	REG2	154.722	97.4013	63.8655	-0.23359	0.245137	-0.0802158	-0.447267	0.260085	0.413408	-0.598961	0.216278	-0.357979	-0.927395	0.154431	0.420433	-0.793097	0.0851833	-0.490338	-0.0686128	0.138812	-0.15986	0.249202	-0.828815	-0.112678	-0.457893	0.161432	-1.34704	0.187647	-0.268627	-1.39959		0.321407	0.0777829	-1.09471		0.194136	1.00937	0.435118	-0.134298	0.644768	0.489046	0.251489	0.298033	1.25614	0.518223	0.0539277	0.20965	0.0539277
YBR051W		169.631	109.368	86.5038	0.399742		0.0453029	-0.82742	0.358311	0.954405	0.289081		-0.2039	-1.58152	0.315852	1.24375		-0.543899	0.725579	0.688351	0.38277	-0.0365459			0.209696	-0.27718			-0.234555	-0.232463			-0.0470714	0.110869							-0.409727	0.555396	0.173074	0.240634
YBR052C	RFS1	638.556	371.562	285.049	0.58473	-0.970162	1.02326	-0.377572	1.35026	1.41158	0.548466	-1.37884	0.996577	-0.807471	1.94598	1.9395	0.632776	1.53974	2.25719	1.75849	0.136349	-0.208917	-0.645895	0.299559	-0.115932	-0.529784	-0.87494	0.0936363	2.59353	2.14041	-0.306651	0.714659	2.42115	2.28177	-0.0624639	0.852597	-0.0843096	-2.01162	0.363801	-1.44025	-0.311213	0.181006	0.252281	0.320867	-0.812476	0.205923	-0.182795	-0.675014	-0.182795
YBR053C		218.337	153.715	120.861	-0.937273	-0.400627	-0.670272	-0.429944	0.387265	0.649122	-1.58565	-0.631309	-1.08229	-0.897587	0.363434	0.779154	-1.50016	-0.0710247	0.632213	-0.449504	-0.549765	-0.702483	-0.960641		-1.02258	-1.25309	-1.23936		0.52403	-0.431378	-2.26942	-1.85769	0.614987	-0.0711149	-1.91623	-1.43161	-0.085491	0.868848	0.417862	0.60257	-0.268779	1.22866	0.472819	0.550607	0.676868		0.810795	-0.686642	0.810795
YBR054W	YRO2	154.266	100.055	74.7617	0.279041	-0.485536	-0.222491	-0.199522	0.91074	1.73858	0.119837	-0.742755	-0.532627	-0.501104	1.22369	2.43715	-0.599515	0.24609	0.490699	1.31936	-0.208499	-0.221121	0.224901	-0.234923	-0.571624	-0.547669	0.133295	-0.588774	3.62457	2.95747	0.77736		3.32099	3.02929	0.961346		0.719353	-0.14324	0.0668886	0.0984111	0.732992	1.11778	0.363126	0.326548	-0.828051	0.353851	1.05089	0.666103	1.05089
YBR055C	PRP6	107.563	79.99	47.2961	0.528816	-1.05945	-0.077588	-0.125007	-0.374643	0.0277496	0.470065	-1.49603	-0.354753	-0.372887	-0.888656	-0.16648		-1.05646	-1.22154	-0.738032	-0.537974	-0.353442	-0.216957		-1.007	-0.741581	-0.378302		0.812356	0.661581	-0.63088		0.866625	0.928815	-0.368686						0.332887	0.571552	0.469029	0.388139	-0.00961544
YBR056C-B
YBR056W		490.783	285.459	183.986	0.110969	0.16471	-0.766712	-0.381145	0.362235	0.881105	-0.11583	0.110714	-1.20068	-0.813621	0.3223	1.1322		0.240499	0.356863	-0.178552	-0.98662	-1.1556	-1.21208	-0.555446	-1.59986	-1.91712	-1.53049	-0.998009	1.79065	0.699905	-0.70116	-1.59146	1.72043	0.963878	-0.435064	-1.19521					-0.0345631	1.31075	0.613238	0.761519	-1.09542	0.442563
YBR056W-A
YBR057C	MUM2	73.1144	44.8519	28.2221	0.279497	-0.388639	-0.00912496	0.215272	0.192265	0.2241	0.120477	-0.615574	-0.270712	0.212624	0.0429781	0.132335	0.0434755	-0.617964	-0.112644	-0.612847	0.157509	0.481535	0.41706	-0.500729	-0.087971	0.48205	0.355783	-0.928147	1.29058	1.36833	-0.00629827		1.28399	1.57541	0.221208		0.0770011	-0.65905	-0.314187	0.169148	0.155622	0.745182	0.24548	-0.000515524	0.134575	0.427418	1.05937	0.46981	1.05937
YBR058C	UBP14	144.074	111.601	69.2895	0.382876	0.647428	0.0202763	0.0640468	0.0352434	-0.274819	0.265433	0.744299	-0.234621	-0.0475868	-0.215065	-0.626943	-0.0873081	-0.816521	-0.875407	-0.903405	-0.193436	-0.130635	-0.110079	-0.43495	-0.55172	-0.415065	-0.254555	-0.844163	0.59777	0.314366		-0.290707	0.679344	0.611154		-0.0401532	0.352741	0.831607	-0.147313	0.0397213	0.660343	0.276462	0.358284	0.28443		0.409213	0.423775	0.807655	0.423775
YBR058C-A	TSC3																						0.258235				0.17189				-1.29463				-0.995577										1.16747
YBR059C	AKL1	100.442	70.9	43.0007	-0.0828899	-0.384321	-0.174403	-0.225666	0.865418	0.527769	-0.387653	-0.609907	-0.473597	-0.546089	1.14921	0.594472	-1.00914	-0.46125	0.108992	-0.505401	-0.104385	0.0144891	-0.705329	-0.464638	-0.434046	-0.20239	-0.943755	-0.882068	0.24767	0.0886709	-3.80229	-0.755062	0.373792	0.404669	-3.36397	-0.452494	0.621488	0.399234	0.535544	0.463052	1.04022	1.09987	0.32966	0.216879	2.42021	0.41743	0.564329	0.504675	0.564329
YBR060C	ORC2	175.511	126.567	84.5635	0.527791	-0.466384	-0.111796	0.0946369	0.497799	-0.194409	0.468628	-0.717617	-0.396745	0.00504898	0.54508	-0.504572	0.0758026	-0.466091	-0.955958	-0.612017	-0.0287116	0.0903994	-0.137266	0.309216	-0.334048	-0.091146	-0.286033	0.105966	0.652159	0.866184	0.00250147	-0.0957809	0.726812	1.116	0.22952	0.132938	0.392825	-0.79342	-0.472547	-0.0707537	1.50104	0.107446	0.305337	0.181545	-0.515553	0.20325	0.579993	1.97359	0.579993
YBR061C	TRM7	136.329	97.5299	52.3526	0.267597	0.63602	0.640535	-0.145353	-0.304756	-0.692243	0.103791	0.729325	0.526769	-0.407897	-0.773806	-1.2622	-0.00251678	0.276322	-0.680655	0.0858533	0.358768	0.28064	0.0515248	-0.232522	0.177979	0.187646	-0.067445	-0.585708	0.0155427	0.849177	-0.355373	0.10813	0.171202	1.10044	-0.10848	0.314008	0.106308	0.731842	0.529286	-0.405381	-0.0931511	-1.34805	0.180789	0.0929943	0.0410352	0.353187	-1.87734	-0.622437	-1.87734
YBR062C		205.881	162.374	107.529	-0.573645	-0.318629	0.435466	-0.191482	0.347206	0.844022	-1.07578	-0.523683	0.27504	-0.48727	0.297602	1.07576	0.660744	1.05258	1.07253	0.968732	0.134841	0.709444	0.910614	0.518099	-0.117925	0.816044	0.927235	0.372662	2.0148	1.79656	0.282675	0.714533	1.91606	1.96719	0.494133	0.852485	-1.73652	-1.18443	-0.385704	-1.14801	-0.774926	0.107028	0.252766	-0.1066	0.433102	0.145438	0.492732	-0.389223	0.492732
YBR063C		89.4149	59.4298	24.3447	-0.595829	0.0532613	-0.404268	0.442036	0.509103	0.388243	-1.10688	-0.0355653	-0.755764	0.602812	0.563656	0.382136	-1.19639	-1.66452	0.233625	-0.70759	-0.882545	-0.173127	-0.355498	-0.29624	-1.46233	-0.477336	-0.538709	-0.667062	-1.23289	-0.763096	-0.871828	-2.03101	-0.918375	-0.374598	-0.596254	-1.58551	0.0895036	1.16082	0.440624	1.7992	0.330031	1.08973	0.579785	0.304209	0.0575447	0.370822	0.649103	-0.110592	0.649103
YBR064W		104.953	70.6532	47.627	0.0197401	-0.228878	0.129364	-0.757843	0.246937	-0.153365	-0.243748	-0.405882	-0.100711	-1.4618	0.132825	-0.442109		-1.12244	-0.269406	0.166378	-0.224398	-0.139881	-0.289427		-0.592634	-0.428614	-0.46221		-0.840558	-0.45153		-1.7697	-0.575964	-0.089552		-1.35348					0.402231	-0.608487	0.368236	0.288733
YBR065C	ECM2	54.8833	46.4087	33.5032	-0.416823	-0.0987082	-0.294487	0.279252	-0.619813	-0.276254	-0.855886	-0.23503	-0.621004	0.322712	-1.29156	-0.629127	-1.14914	-0.118247	0.108475	-0.426263	-0.302393	0.0295675	0.0633518	0.427586	-0.695699	-0.180293	-0.0537513	0.257096	-0.887446	-0.57847	-0.739746	-1.24097	-0.616885	-0.205687	-0.471507	-0.883972	0.293258	0.914114	0.52814	1.47186	-1.40003	-0.202864	0.393306	0.209861	0.417756	0.170489	-0.731004	-1.92817	-0.731004
YBR066C	NRG2	200.457	99.9463	32.5363	-0.407188	0.25024	0.360023		-0.206188	0.169035	-0.842376	0.222976	0.182431		-0.611823	0.048534		0.304845	-0.950558	-0.0614671	0.30958	0.305137	-0.121243		0.112981	0.223546	-0.267481		0.708862		-1.23207	-0.653369	0.7763		-0.936494	-0.362192					0.338735	0.110001	0.196599	0.0815917	0.669013
YBR067C	TIP1	564.589	256.206	123.536	0.466413	0.495141	0.857231	1.42897	0.810747	1.57674	0.382565	0.544416	0.792771	2.30101	1.05937	2.19084	1.25542	1.57015	1.78456	1.92813	1.29417	0.448345	0.879344	1.48222	1.41404	0.433412	0.89103	1.60362	1.27326	1.01041	0.733378	0.765141	1.26888	1.24795	0.919806	0.897424	-0.872858	-0.711007	-0.462652	1.04559	-0.725196	0.26271	-0.119877	0.014933	-0.0287761	-0.121402	0.725362	-0.262545	0.725362
YBR068C	BAP2	1209.91	560.237	231.939	1.87317	2.43232	2.07757	1.24101	1.52776	1.07201	2.35508	3.08704	2.29078	1.9776	2.23768	1.42273	2.51981	0.70858	0.579594	0.478292	1.50942	1.503	2.19477	1.96257	1.69849	1.97898	2.41408	2.21692	2.99269	2.20501	2.76579	3.14856	2.76952	2.34087	2.83935	3.01387	-0.164728	0.567227	-0.22903	-0.542213	1.65808	0.944438	-0.189066	-0.475976	-0.425271	-0.254347	1.17347	1.88711	1.17347
YBR069C	TAT1	334.985	257.447	127.078	1.35026	0.798563	1.50516	1.00548	0.946635	0.490846	1.62188	0.942669	1.58812	1.57231	1.28268	0.538281		0.515538	0.143553	0.829093	0.951418	0.736197	1.64381	1.87122	0.961126	0.85525	1.77616	2.10029	0.682482	0.765921	1.68911	1.67437	0.753277	1.02427	1.82247	1.7048					1.13913	-0.290812	-0.00970738	-0.119053	-0.046308	-0.229065
YBR070C	ALG14	90.3194	65.4094	48.1322	0.451837	-0.538714	-0.635739	0.202701	-0.508232	-0.377148	0.362128	-0.812553	-1.0399	0.190993	-1.10819	-0.782672	-0.837238	0.176044	-0.202641	-0.129548	-0.0460211	0.129152	0.238116	-0.0101174	-0.356922	-0.0343551	0.148597	-0.30175	-0.146199	-0.162243	-0.853024	-0.784085	0.0300414	0.175113	-0.578494	-0.478266	1.19937	0.0246856	-0.202665	1.02823	-0.905549	-0.653124	0.3109	0.163507	0.727091	0.291632	-0.450459	-0.702884	-0.450459
YBR071W		180.177	137.11	140.231	0.41433	0.932064	1.23635	0.494072	0.559928	1.25015	0.309537	1.11789	1.25816	0.692349	0.64718	1.69383	0.93777	1.24362	0.664006	0.920104	0.94534	0.676447	0.129748	1.12655	0.953093	0.767689	0.0231245	1.14952	2.48168	1.25421	0.637019	1.13565	2.32353	1.471	0.828798	1.22643	-0.628233	0.180123	0.320389	-0.24542	-0.0168251	0.773724	-0.00775347	-0.0912412	-0.805674	-0.0229636	0.453335	-0.337214	0.453335
YBR072C-A
YBR072W	HSP26	72.0242	89.2781	146.996	-0.208822	-0.165947	-0.938036	-0.823294	0.774513	2.41525	-0.564232	-0.323283	-1.41098	-1.57442	0.999822	3.46693	-1.8053	0.156653	1.94329	2.75503	0.100744	-0.438364	-1.22361	-0.41112	-0.162981	-0.866031	-1.54384	-0.813738	1.37504	0.0544791			1.35771	0.373388			1.24107	1.48202	0.394316	0.230883	-0.943468	0.711892	0.263725	0.427668		0.402618	0.317576	-1.33778	0.317576
YBR073W	RDH54	51.3091	52.8205	48.4658	-0.160612	-0.0484493	0.194015	0.239306	-0.0823844	-0.101943	-0.496633	-0.169064	-0.0213506	0.253978	-0.408369	-0.363853	-0.651349	-1.66528	-1.31297	-1.89718	0.12276	0.154001	0.232518	0.279134	-0.133889	0.00206018	0.142115	0.0675579	-0.0684879	-0.254357	-0.841999	-0.780781	0.0978643	0.090839	-0.568081	-0.475332	0.154716	0.482285	0.629998	0.905327	0.904603	1.53333	0.256649	0.151941	0.710196	0.211576	0.903331	0.274604	0.903331
YBR074W		52.8707	35.2831	21.8508	-1.47552	-0.365894	-0.0309711	-0.738479	0.0257768	0.383143	-2.34036	-0.58572	-0.297529	-1.42848	-0.230622	0.374373	-0.54543	-0.894962	0.563879	-1.28964	-0.331244	-0.134616	-0.543029		-0.733824	-0.420898	-0.755838		-0.530357	-0.443116	-1.39741	-1.06626	-0.305234	-0.0818542	-1.09265	-0.728834	-1.79493	-0.0402902	0.247901	-0.883049	-0.7945	1.66401	0.40258	0.286283	0.33681		1.41611	-1.0424	1.41611
YBR076C-A
YBR076W	ECM8	201.185	141.679	60.7807	0.127301	-0.926181	0.324843	-0.177965	0.791945	0.444944	-0.0929284	-1.32112	0.139246	-0.464012	1.02847	0.468426		-0.774142	-0.491206	0.0665961	-0.576815	0.191755	0.0707332	0.0312972	-1.05833	0.057387	-0.0452049	-0.248873	0.968844	-0.580983	-1.86027		1.0032	-0.207987	-1.5298						1.51967	0.40183	0.481514	0.134368	1.4846	0.28017
YBR077C	SLM4	556.258	444.025	251.339	1.23692	0.773003	1.18014	0.146147	0.445554	0.726139	1.46295	0.90912	1.18916	0.0936818	0.459224	0.896362		1.71516	1.5537	1.66894	0.802179	0.678798	0.814527	0.582214	0.763916	0.771133	0.815983	0.454521	1.96973	1.32387	0.966198	1.32147	1.87673	1.53473	1.1397	1.39144					-1.09447	-0.772582	0.0382628	-0.0923353	-0.323713	0.127693
YBR078W	ECM33	1208.37	576.704	300.09	1.81428	2.30203	2.15706	1.28513	1.77118	1.66505	2.27251	2.91602	2.38836	2.05351	2.6377	2.32525	2.71377	1.30992	0.759836	1.54625	2.18242	1.70298	2.24918	2.03168	2.58781	2.27204	2.47707	2.30516	3.36274	3.03271	2.91561	2.90637	3.09249	3.09812	2.98085	2.7988	-0.441269	0.202244	-0.325418	-0.660262	1.87787	0.778998	-0.40539	-0.569058	-0.503773	-0.273475	1.10442	2.20329	1.10442
YBR079C	RPG1	89.5088	69.1191	39.4501	0.414112	0.0737028	0.401719	0.309167	1.35796	0.213532	0.309231	-0.00873511	0.233615	0.374187	1.95864	0.116252	0.156159	-1.06132	-1.2638	-1.18703	0.724364	0.927027	0.29542	0.996857	0.66109	1.1349	0.214944	0.983925	0.499409	0.600434	-0.310036	-0.11022	0.593499	0.872873	-0.0656612	0.120116	0.153072	-0.164894	0.0774556	0.218028	3.22243	1.30328	0.0632748	-0.207878	0.280606	0.0129322	1.22582	3.14498	1.22582
YBR080C	SEC18																						-0.0438902				-0.17792				-0.909783				-0.6321										0.454181
YBR081C	SPT7	388.097	296.136	196.352	0.82546	0.0100468	0.538104	-0.360932	-0.483186	-0.137156	0.886012	-0.0922857	0.401032	-0.77884	-1.06703	-0.417442	-0.147475	-0.306311	-0.399457	-0.339598	-0.387443	-0.114232	-0.180984	0.0408287	-0.808087	-0.391026	-0.336652	-0.236703	0.907187	0.813159	-0.0245243	0.207084	0.949389	1.06749	0.203995	0.401878	1.03349	0.0551893	0.548507	-0.631365	-0.667573	-0.0778433	0.420644	0.276794	-0.540646	0.277532	-0.626351	-1.21608	-0.626351
YBR082C	UBC4	336.061	283.645	176.609	0.943826	0.380197	0.942225	0.907325	0.974835	1.20455	1.05198	0.393549	0.897105	1.40343	1.32902	1.62443	1.97604	2.41189	1.44414	1.58459	1.34036	1.20166	0.943082	1.10828	1.47508	1.53738	0.964828	1.12619	2.76631	2.03987	1.98097	1.72263	2.57194	2.18979	2.09811	1.74766	-0.924061	-1.58249	-1.07894	-0.572619	-0.115115	0.0398419	-0.134725	-0.335712	-1.13328	-0.0179074	1.11878	0.963823	1.11878
YBR083W	TEC1	91.7378	70.3859	44.6756	0.881122	0.894178	0.614732	0.486744	0.856939	1.02404	0.964061	1.06817	0.495095	0.67974	1.13528	1.34972		-0.377096	-0.560724	0.0194082	0.378503	0.835011	0.346662	0.281821	0.204057	1.00006	0.274274	0.070989	0.251204	-0.00778273	-0.21761	-0.14335	0.376877	0.316425	0.0216326	0.0906975					1.696	1.33031	0.174445	-0.165047	0.252641	0.210832
YBR084C-A	RPL19A	234.214	198.966	114.697	1.9381	1.74402	2.33283	1.49165	0.58215	0.744489	2.44613	2.18361	2.60413	2.40886	0.6837	0.924287	1.79816	0.914742	0.695137	0.734734	1.92382	1.76519	2.11579	2.07375	2.24609	2.36321	2.32263	2.35887	1.07873	1.15575	1.7099	1.76257	1.0991	1.38092	1.8421	1.78313	0.647973	0.385453	0.805969	0.610704	-0.0114376	0.189553	-0.322269	-0.598018	0.480533	-0.28512	-0.616416	-0.817407	-0.616416
YBR084W	MIS1	218.398	168.301	85.0211	0.315872	-0.807309	0.363962	0.0453889	-0.412381	-0.553618	0.17148	-1.16509	0.187266	-0.0796912	-0.950673	-1.05123	0.482328	-0.532595	-1.14015	-0.759648	0.60531	0.532193	0.847098	0.574964	0.503767	0.556289	0.853695	0.445264	0.805506	0.878201	0.378056	0.380828	0.860646	1.127	0.584218	0.55616	-0.310847	-1.64742	-0.295062	-0.562019	0.189475	-0.291584	0.101543	-0.0240955	0.269478	0.1297	0.0034773	0.484537	0.0034773
YBR085C-A
YBR085W	AAC3	45.4662	33.8327	28.0525	-0.0245937	-0.767793	-0.0429502			-1.18641	-0.305912	-1.11323	-0.312234			-2.01424		-0.637803		-1.15483	-1.00045	-0.764926	-1.12178	-0.700016	-1.61814	-1.3446	-1.42593	-1.18259	-1.40896	-0.634396			-1.07204	-0.256852								-0.859406	0.617684	0.579672		0.482575
YBR086C	IST2	95.2551	60.0189	46.0568	0.504701	-0.423969	0.259421	0.47667	0.944783	1.17741	0.436251	-0.661946	0.0589388	0.662406	1.27963	1.58313		-0.876428	-0.42605	-1.36922	0.462909	0.489631	0.998042	0.274358	0.315595	0.493915	1.02846	0.0614604	-0.197385	-0.270287	-0.687714	-0.75934	-0.0146314	0.0762645	-0.422365	-0.456292					1.70569	2.95235	0.147315	-0.00428424	1.45083	0.212898
YBR087W	RFC5	83.5224	52.8109	39.6246	-0.215726	0.386521	0.59678	-0.107072	-0.346824	-0.240501	-0.573913	0.401849	0.473059	-0.342028	-0.842939	-0.574716		0.0178413	-1.13599	-0.634719	0.196586	0.272287	0.441199	0.288012	-0.0363329	0.175405	0.383732	0.0788928	0.671937	0.88317	-0.237376	-0.108752	0.744073	1.13154	0.00296414	0.12142					0.293053	0.0600032	0.232919	0.0968824	0.380768	0.209119
YBR088C	POL30	73.1099	63.4316	32.2834	0.303643	0.521107	0.651439	1.0271	0.386261	0.184947	0.154333	0.578498	0.540154	1.60952	0.361784	0.0727495		-0.45181			0.581894	0.479346	1.17431	0.525802	0.472825	0.478843	1.23255	0.382497	-0.35453	-0.45609	-0.192235	-0.566489	-0.15178	-0.0937232	0.0455977	-0.285043							0.109069	0.000503251	1.18695	0.143306
YBR089C-A	NHP6B
YBR089W		112.86	114.66	82.0387	0.525218	-0.235911	0.569881	0.765039	-0.0471083	-0.646921	0.465021	-0.415114	0.44004	1.1586	-0.350398	-1.19323	-0.141155	-0.510195	-0.66182	-0.474972	0.73466	0.555783		0.818081	0.674694	0.590858		0.755669	-0.31421	-0.22946		-0.0462467	-0.116591	0.113617		0.176924	0.606176	-0.273959	0.581195	1.29975	0.311422	-0.718253	0.0599655	-0.0350757		0.0624121	-1.29945	-0.269773	-1.29945
YBR090C		521.043	355.955	188.583	0.0587574	0.028186	0.836489	0.479311	-0.191988	-0.0515326	-0.189039	-0.0684774	0.76731	0.66695	-0.588487	-0.287136	1.2993	1.70542	1.49631	1.32531	0.23022	0.603117	0.781564	0.314259	0.00811216	0.660226	0.777817	0.112405	2.25654	2.18904	1.01735	1.62279	2.12704	2.32626	1.18801	1.659	-1.48834	-1.36778	-0.531992	-0.632351	-2.08479	-1.61245	0.222108	-0.0571083	-0.410191	0.201855	-1.08046	-1.5528	-1.08046
YBR091C	MRS5	145.883	155.193	70.3859	0.512468	0.0547856	0.890601	-0.0494213	-0.902702	0.0199618	0.447143	-0.0335646	0.833735	-0.242829	-1.75645	-0.178332	0.460138	1.73375	0.699638	0.890732	0.598757	0.846102	0.699319	0.0611374	0.495108	1.01631	0.682592	-0.210774	1.46232	1.65802	0.271882	0.571895	1.43389	1.84044	0.48394	0.725824	-0.0129951	-0.493703	0.373596	-0.702967	-2.45608	-1.06906	0.103649	-0.17021	0.198652	0.271911	-1.44266	-2.82968	-1.44266
YBR092C	PHO3	321.576	295.546	158.944	0.359585	0.216041	1.59043		0.036489		0.232773	0.178088	1.6928		-0.213018		1.4797	0.816118	0.056707	0.174411	1.10405	0.977207	0.39553	0.931588	1.16282	1.20844	0.330855	0.900592	0.19249	0.787975	1.05891	0.785916	0.325634	1.04445	1.22726	0.915872	-1.24693	-1.30162	0.213093		-0.269725		-0.0587685	-0.231235	-0.896406	0.0309967		-0.482817
YBR093C	PHO5	89.251	66.7778	41.4152	0.886714	0.702853	0.801609	0.367855	1.17309	0.163724	0.971901	0.817045	0.724494	0.47517	1.65483	0.0404518	-0.0859602	-0.0505864	-0.17867	-0.661246	1.53469	0.694984	-0.263502	0.757562	1.73188	0.794854	-0.432193	0.6784	-0.602049	-0.5327	-0.447322	-0.343061	-0.367803	-0.163813	-0.195322	-0.0866427	1.05786	0.903005	0.810455	0.56113	1.8335	0.701698	-0.19719	-0.0998695	-0.23687	0.0791619	-0.108757	1.02304	-0.108757
YBR094W		81.8974	47.5376	30.3277	-0.879553	-0.841435	-0.367851	-0.281163	-0.68041	-0.447716	-1.50471	-1.20988	-0.711062	-0.641583	-1.39114	-0.890066	-0.858865	-1.34585	-1.22777	-1.15907	-0.304408	0.067002	0.131935	-0.504789	-0.698361	-0.125434	0.0256571	-0.933331	-0.0217334	-0.267506	-1.00283	-0.81617	0.138669	0.078809	-0.719977	-0.506757	-0.64585	-0.35102	0.147803	0.217281	-0.163371	0.269007	0.393954	0.192436	0.745634	0.428542	0.121205	-0.311174	0.121205
YBR095C	RXT2	78.1244	52.427	30.455	0.170059	0.395008	-0.120428	0.11244	0.155358	-0.0348814	-0.0329748	0.412989	-0.40734	0.0356819	-0.0176738	-0.261795	-0.192849	-0.364565	-1.0134	-0.525773	-0.33907	0.0455017	0.245902	0.75918	-0.744165	-0.156942	0.157611	0.680465	0.404885	0.0718154	-0.727058	-0.198944	0.511003	0.389248	-0.459523	0.0413308	0.159875	0.605838	-0.21449	0.228531	0.995726	0.263978	0.405095	0.202444	0.617134	0.0787142	0.478469	1.21022	0.478469
YBR096W		147.766	94.4803	45.6254	0.779529	-0.394608	0.39511	0.192198	-0.3468	0.58233	0.82161	-0.623409	0.225501	0.172921	-0.842899	0.677506	-1.26154	0.291468	0.250356	0.159951	0.165091	0.333961	-0.0100388	0.966957	-0.0779513	0.265786	-0.138725	0.945749	-0.201068	-0.0458902	-0.798637	-1.63082	-0.0178457	0.281562	-0.527127	-1.23015	2.08315	0.638128	1.48704	1.43446	-1.09326	0.517555	0.243042	0.0681753	0.388402	0.0212078	-0.969483	-2.58029	-0.969483
YBR097W	VPS15	104.348	94.0007	74.5303	-0.441891	-0.635854	0.00149429	-0.33241	-0.141196	0.0260529	-0.891035	-0.940052	-0.257676	-0.729762	-0.505017	-0.169062	-0.653135	-1.28741	-1.34248	-0.412557	-0.230777	-0.313512	-0.683767	-0.0131157	-0.601063	-0.683065	-0.91879	-0.305578	-0.480628	-0.227043	-0.22052	-0.773268	-0.261833	0.115828	0.0188842	-0.46866	-0.237901	-0.286917	0.395458	-0.0766275	0.837459	0.243495	0.370287	0.369553	-0.937674	0.292462	-0.151964	0.442001	-0.151964
YBR098W	MMS4	74.2588	55.8109	33.0143	-0.428825	-0.976418	-0.89946		0.258155		-0.872715	-1.38705	-1.36363		0.151259			-1.15551	-0.785749	-1.20259	-1.26836	-0.630033	-0.728216	-0.77733	-1.97215	-1.14692	-0.970254	-1.2813	-1.01129	-0.415031	-1.08502	-1.56491	-0.724971	-0.0561597	-0.797607	-1.17163					0.937007		0.703797	0.516883	-0.172647	0.503973
YBR099C		109.206	70.4711	54.4257	-0.109921	0.209538	-0.240779		0.318783	-0.476573	-0.425555	0.169554	-0.555076		0.250893	-0.933982		-0.0742721	-0.898117	-0.23763	-0.0393017	0.18959	-0.312591		-0.348042	0.0542148	-0.48903		-1.03638	0.0326024	-1.4196		-0.746867	0.353373	-1.11361						1.14901	-0.696352	0.308741	0.135375	0.624579
YBR101C	FES1	727.959	637.518	521.007	1.48179	1.20295	1.51402	0.678011	0.555298	1.20223	1.8063	1.47344	1.59901	1.00885	0.639572	1.6209	2.80834	1.64962	0.585802	0.619288	0.700157	0.78954		0.482804	0.629101	0.933422		0.327597	3.45178	3.01987		2.23275	3.17019	3.08638		2.20064	-1.00205	-1.33491	-1.20933	-1.79949	0.0537695	1.00161	0.0710557	-0.143882		0.155207	2.21095	1.2631	2.21095
YBR102C	EXO84	132.365	89.3055	61.6724	-0.0810523	0.278348	-1.14608	-0.209389	-0.722972	-0.23424	-0.385077	0.259868	-1.66637	-0.518083	-1.46108	-0.565188	-0.2643	-0.745628	-1.26709	-0.840673	-0.293194	0.0699473	-0.473346	-0.21683	-0.683543	-0.121118	-0.675157	-0.565674	0.554613	0.520727	-0.6277	-0.169539	0.641679	0.79995	-0.365683	0.0674423	-0.120776	0.524168	-1.40207	-0.253783	-0.193999	0.275485	0.390349	0.191065	-0.309473	0.348844	1.67755	1.20807	1.67755
YBR103C-A
YBR103W	SIF2	84.4642	63.2518	42.1394	-0.332049	0.192263	-0.609581	-0.385545	-0.0541071	-0.601399	-0.737018	0.146879	-1.00779	-0.82119	-0.3619	-1.12395	0.106343	-1.0054	-0.775053	-0.818193	-0.0683553	-0.123154	-0.635656	0.414557	-0.386435	-0.404101	-0.863084	0.240462	0.203589	0.299977	-0.846597	0.0677083	0.335321	0.59799	-0.572424	0.278114	-0.843361	0.0405351	-1.11414	-0.927534	0.413154	-0.305755	0.318079	0.280947	-0.29066	0.174095	0.808382	1.52729	0.808382
YBR104W	YMC2	192.373	123.725	79.8288	-0.297365	-0.460993	0.302231	0.206966	0.0414521	-0.775342	-0.688384	-0.710541	0.111489	0.198332	-0.204861	-1.38866	-0.882395	-0.118382	-0.856683	0.469965	0.0611026	0.593237	0.294484	0.29074	-0.215365	0.645746	0.21386	0.0823755	-0.422607	0.751068	-0.682235		-0.211195	1.01069	-0.417189		0.19401	0.171853	0.993884	1.08073	0.651822	-1.85863	0.276468	-0.0525093	0.63105	0.208364	-2.85251	-0.342062	-2.85251
YBR105C	VID24	108.73	78.337	66.2442	-0.0511094	0.00602741	1.09744	0.25202	0.389835	0.763282	-0.343091	-0.0975613	1.08764	0.275856	0.367657	0.952887	-0.331277	0.210197	0.0657949	0.246944	0.201396	0.132524	0.410494	0.0515206	-0.0299771	-0.0294144	0.348181	-0.223052	0.0354381	0.757831	0.133396	-0.408464	0.188566	1.01687	0.353145	-0.14472	-0.0118144	0.233716	1.41891	0.607133	0.301862	0.705943	0.231373	0.161938	-0.0049636	0.274573	-0.71297	-1.11705	-0.71297
YBR106W	PHO88	799.056	719.043	464.125	1.41965	1.01026	1.22189	0.903489	0.164604	0.168541	1.71918	1.22053	1.2404	1.39682	-0.00247806	0.0477823	2.3439	2.65441	1.35985	2.28142	1.33755	1.00775	1.58134	1.9729	1.47137	1.2532	1.70382	2.23011	2.81762	3.15551	2.32111	2.84367	2.61673	3.21047	2.41937	2.74313	-0.624726	-1.12337	-1.1035	-0.947077	-1.36232	-2.23364	-0.133821	-0.245451	-0.715547	-0.257207	-1.13013	-0.258822	-1.13013
YBR107C	IML3	71.8159	51.0083	25.555	-0.749377	0.263181	-0.14489	-0.555727	-0.0598764	-0.158669	-1.32218	0.239962	-0.437368	-1.11402	-0.371381	-0.450181	-0.138695	0.144773	-0.29144	0.0477811	-0.0226476	-0.0715309	-0.237053	0.646173	-0.326035	-0.32845	-0.401569	0.536182	0.915235	1.42	-0.801757	0.108093	0.956413	1.62268	-0.530074	0.313975	-1.18349	0.378657	-0.298673	-0.975325	-0.0799407	-0.497962	0.303387	0.256919	0.128504	0.109991	-0.199288	0.218733	-0.199288
YBR108W		180.645	125.603	93.8096	0.0227164	-1.08571	-0.704536	-0.434655	-0.421682	-0.62321	-0.239575	-1.53051	-1.12435	-0.905693	-0.965957	-1.15714	-0.421239	-0.705303	-0.613813	-0.784117	-0.703174	-0.983122	-0.74578	-0.728085	-1.2253	-1.66436	-0.99059	-1.21843	0.974736	0.822135	-1.56734		1.00834	1.0757	-1.25314		0.181664	-1.10927	-0.703115	-0.484454	-0.352144	-0.373024	0.52213	0.681235	0.262551	0.490344	0.330091	0.350971	0.330091
YBR109C	CMD1	304.909	249.278	172.93	0.981534	0.876239	0.926674	0.322485	0.702777	0.690727	1.10486	1.04462	0.878016	0.397103	0.881933	0.842469	0.563365	1.55936	1.47512	1.45506	0.992169	0.656954	0.572034	1.01698	1.01497	0.739121	0.535217	1.00961	1.50924	1.33489	0.703209	0.622629	1.47483	1.54482	0.891313	0.770875	0.541491	0.481256	0.314652	-0.166262	-0.593189	-0.612588	-0.0228058	-0.0821675	-0.356096	0.00736424	-0.927239	-0.907841	-0.927239
YBR109W-A
YBR110W	ALG1	66.3818	35.5556	25.9279	-0.288087	-0.983515	0.758191	0.409972	0.0693209	-0.0648319	-0.675375	-1.39637	0.671197	0.54764	-0.159063	-0.307375	-1.42963	-0.997956	-1.0252	-1.37948	-0.466003	-0.150879	-0.157855		-0.911898	-0.444731	-0.309872		-0.903751	-1.33674			-0.631116	-0.899418			0.754258	0.0332639	2.10083	1.97727	0.866141	1.0721	0.445895	0.293852			-1.02873	-1.23469	-1.02873
YBR111C	YSA1	433.869	281.294	138.74	0.456863	-0.293346	-1.40691	0.0859854	-0.0272888	0.895521	0.369174	-0.490498	-1.98655	-0.0098374	-0.317827	1.15413	-0.208748	1.46991	1.48712	1.32951	-0.349656	-0.501874	-0.523836	0.756332	-0.758153	-0.959104	-0.733616	0.676829	1.7087	1.30513	0.491622	0.501834	1.64891	1.51759	0.691476	0.663611	0.577922	-0.28175	-1.7778	0.198911	-1.80495	-0.175371	0.408498	0.45723	-1.42509	0.0795024	1.60243	-0.0271478	1.60243
YBR111W-A	SUS1																						-0.260437				-0.428644				-1.01548				-0.731926										0.303282
YBR112C	CYC8	193.522	139.857	68.4419	0.0789801	-0.224802	0.474548	0.493478	1.41164	0.581161	-0.160683	-0.400533	0.323015	0.691327	2.04685	0.675727	2.10438	-0.0602653	-0.521068	-0.363597	0.662536	0.761004	1.12718	0.740605	0.579387	0.891603	1.17798	0.65675	2.65885	2.42274	1.14701	1.71935	2.47816	2.54007	1.31047	1.74474	-2.26507	-2.50492	-1.78137	-1.41306	2.56792	1.03932	0.0831485	-0.130599	-0.132483	0.083855	2.82069	4.34929	2.82069
YBR113W		135.596	83.5923	41.123	0.443755	-0.238133	0.383157	0.627096	-0.10685	0.785023	0.350796	-0.41803	0.210829	0.921241	-0.448575	0.985975	0.118369	0.438214	0.627925	0.360372	1.00207	0.5549		0.302769	1.02806	0.589565		0.0977346	0.746611	0.577165		0.138077	0.809245	0.851585		0.3406	0.232426	-0.5364	0.0924597	0.802871	-1.0765	0.625603	-0.0259891	-0.0346649		0.205035	0.533143	-1.16896	0.533143
YBR114W	RAD16	157.232	92.4478	71.4032	-0.78564	-0.769686	-1.0392	-0.318007	-0.0590906	-0.439475	-1.37303	-1.11571	-1.53517	-0.704979	-0.370089	-0.877524	-0.878673	-1.67785	-2.03565	-1.3688	-0.638929	-0.989064	-0.906419		-1.14041	-1.67307	-1.17658		-1.0712	-1.75301	-1.59599		-0.777259	-1.28025	-1.2802		-0.494358	-0.237038	-0.656493	0.173694	1.66556	0.491272	0.501479	0.684001	0.103616		1.14777	2.32205	1.14777
YBR115C	LYS2	296.404	209.06	124.005	-2.58069	-1.7514	0.592269	-0.186501	-0.137264	0.334979	-3.89	-2.40424	0.467522	-0.4787	-0.498557	0.301076	0.119202	-0.206615	-0.631804	-0.105104	0.446996	0.167491	0.343958	-0.0166007	0.294567	0.0218297	0.271144	-0.310027	1.55196	1.27943	0.130609	0.591734	1.51211	1.49407	0.350513	0.743442	-4.0092	-2.52344	0.34832	-0.597902	0.133247	0.406179	0.152429	0.145662	-0.079369	0.293427	0.0578591	-0.215073	0.0578591
YBR116C		277.208	237.892	228.352	0.941309	0.195255	0.258168	0.333779	-0.0510496	0.790899	1.04845	0.150806	0.0573996	0.416536	-0.356875	0.994916	0.424744	1.55666	1.07927	0.883038	0.66587	0.335962		0.679599	0.583793	0.268719		0.578859	0.917708	0.572584		0.480769	0.958571	0.847394		0.644906	0.623709	-0.273938	-0.367344	-0.00820849	-1.43614	0.111878	0.0820767	0.0672437		0.10074	0.479222	-1.0688	0.479222
YBR117C	TKL2	170.652	159.688	237.204	0.179546	0.249905	-0.764728	-0.473009	-0.680983	0.183669	-0.0196723	0.222536	-1.19824	-0.971688	-1.39208	0.0708047	-0.652288	-0.549241	-0.712366	-0.542101	0.000446053	-0.919453	-0.392283	-0.104075	-0.295518	-1.57105	-0.5813	-0.421711	-0.460051	-0.473681	-1.40819		-0.243874	-0.109818	-1.10283		0.632616	0.874824	-0.545955	-0.3194	-0.679715	0.612906	0.295964	0.651599	0.521532	0.317637	1.15886	-0.13376	1.15886
YBR118W	TEF2	114.224	118.843	91.6567	2.58623	2.90285	3.16023	2.16142	2.42255	1.6766	3.35492	3.70462	3.61979	3.56132	3.70814	2.34282	1.21399	0.153034	1.63698	0.835919	2.55588	1.92479		2.62597	3.08131	2.5971		3.06393	0.0404078	0.350772		1.03804	0.192904	0.644461		1.13976	2.14093	2.49063	2.4058	2.34733	2.07116	1.50691	-0.52543	-0.672305		-0.437958	-0.898893	-0.33464	-0.898893
YBR119W	MUD1	309.394	140.028	65.6405	-0.101792	0.422391	0.692617	-0.21795	0.558579	0.0501851	-0.414158	0.44893	0.590702	-0.532813	0.644963	-0.132337	0.289455	-0.0368063	-0.358602	0.19491	0.304094	0.410641	-0.000828138	0.0860682	0.105732	0.378158	-0.128061	-0.178943	1.40384	1.79762	-0.130171		1.38284	1.96816	0.104215		-0.703612	0.159476	0.301248	-0.822267	1.00356	-0.327247	0.198362	0.0324831	-0.232276	0.265011	-0.628495	0.702317	-0.628495
YBR120C	CBP6	214.962	144.018	92.4176	-0.0220677	-0.452524	-1.56074	0.0921549	-0.0624217	0.133002	-0.30237	-0.699425	-2.17538	0.000778294	-0.375563	-0.0063021	-0.779045	0.420514	0.293077	0.346094	-0.0175976	0.106117	0.184575	-0.092629	-0.319362	-0.0681118	0.0866047	-0.407098	0.476506	0.431588	-0.567618	-0.719727	0.57351	0.718399	-0.308938	-0.421117	0.476676	0.0796201	-1.39633	0.779824	-0.66864	-0.352397	0.301764	0.174229	0.395543	0.314469	1.04394	0.727693	1.04394
YBR121C	GRS1	127.326	105.478	69.9989	0.231266	1.34074	0.901908	0.369168	-0.108112	-0.0897778	0.0528481	1.6543	0.847614	0.47743	-0.45065	-0.345339	1.52481	-0.00333004	-0.600936	-0.400035	0.956726	0.900029	0.747067	0.758142	0.968139	1.09534	0.737876	0.67914	1.5411	1.30695	0.82296	1.18429	1.50264	1.51926	1.00441	1.26963	-1.47196	0.129488	-0.677194	-1.04738	0.150286	0.0546961	-0.0114133	-0.195311	-0.266537	0.0790015	0.73189	0.82748	0.73189
YBR121C-A
YBR122C	MRPL36	315.967	225.392	124.71	0.295341	0.593481	0.149377	0.066332	0.67396	0.685371	0.142692	0.673491	-0.0761448	-0.0436546	0.834577	0.834319	0.55816	1.60831	1.4279	1.6666	0.673593	0.576912	0.338821	0.82117	0.593999	0.621823	0.265195	0.759613	1.3899	1.40805	-0.275263	0.767899	1.37068	1.61175	-0.0328193	0.899873	-0.415468	0.115331	-0.634305	-0.601815	-0.593328	-0.832283	0.0795941	-0.0449107	0.298015	0.061557	-0.197979	0.0409772	-0.197979
YBR123C	TFC1	143.178	98.2489	81.6423	-0.375702	0.0120945	-0.27651	-0.343489	-0.482245	-0.555355	-0.798227	-0.089598	-0.598937	-0.748826	-1.06548	-1.05388	-0.118718	-0.607814	-1.15559	-0.794553	-0.407222	-0.347004	-0.457475	-0.369746	-0.834223	-0.732146	-0.656781	-0.760913	0.64468	0.235984	-0.579457		0.720285	0.539444	-0.320119		-0.679509	0.0291201	-0.480219	-0.630108	0.0901026	-0.259323	0.427001	0.385142	-0.336662	0.391166	0.220896	0.570321	0.220896
YBR124W		237.569	145.588	91.2389	0.384498	-0.322646	0.418489	-0.227631	-0.680402	-0.0558109	0.267707	-0.528956	0.254201	-0.549472	-1.39113	-0.293647	-1.18538	0.721267	0.794071	0.782151	-0.355605	-0.264872	-0.479186	-0.0709109	-0.766015	-0.611784	-0.681918	-0.379369	-0.331843	-0.193536	-1.88879	-1.62124	-0.13198	0.146483	-1.55674	-1.22164	1.45308	0.656422	1.43958	0.635906	-2.1852	-1.0758	0.41041	0.346913	0.874819	0.308458	-2.51538	-3.62478	-2.51538
YBR125C	PTC4	175.968	83.0972	47.1198	0.213383	-1.27288	0.221799	-0.390549	0.719555	0.321178	0.0277736	-1.77617	0.0127557	-0.829801	0.909505	0.280073	-0.398187	-0.373903	-0.415246	-0.619012	-0.605508	-0.209482	0.000858869	-0.340688	-1.09624	-0.530612	-0.126108	-0.723812	-1.37344	-0.669858	-0.497246	-0.920257	-1.04104	-0.289296	-0.242474	-0.599185	0.425961	-1.37799	0.410943	-0.431614	1.32475	0.899084	0.490737	0.32113	0.116367	0.383124	0.488141	0.913808	0.488141
YBR126C	TPS1	869.422	412.713	254.294	-0.232517	0.580737	0.131373	0.210851	1.54796	1.81293	-0.597456	0.656765	-0.0982454	0.205017	2.27088	2.5503		0.750918	0.943556	0.456331	1.04125	0.348095	-0.153947	0.425934	1.07984	0.286498	-0.305347	0.254988	3.07654	1.60571	-0.554249	-0.366271	2.8427	1.79258	-0.296311	-0.107253					1.32732	2.09397	-0.0385829	0.0615965	-0.00903562	0.170946
YBR126W-A
YBR126W-B
YBR127C	VMA2	173.521	136.363	75.2373	0.280182	1.17073	0.88047	0.0466368	1.08729	1.06636	0.121437	1.43116	0.821299	-0.0775438	1.51382	1.41413	0.63504	0.642456	0.775311	0.465605	0.755631	0.542349	0.6868	0.548146	0.702406	0.571172	0.668097	0.411024	0.378965	0.658113	0.194184	0.294419	0.488381	0.925643	0.410557	0.47943	-0.513603	0.796116	0.186259	-0.712584	0.738509	0.948523	0.0532248	-0.0288226	0.25754	0.137122	0.762264	0.55225	0.762264
YBR128C	ATG14	103.313	65.5424	29.9575	-0.512933	-0.00642914	0.183343	0.178862	0.540385	0.749845	-0.990649	-0.113911	-0.0344502	0.149974	0.615064	0.932438	-0.814886	-0.33198		-0.430885	0.416757	0.219536	0.00230021		0.254607	0.0980989	-0.124439		0.190677	-0.154222	-1.37251		0.324052	0.182451	-1.06913		-0.175763	0.700975	0.780436	0.964859		1.36332	0.162149	0.121437	0.944695		0.582888		0.582888
YBR129C	OPY1	121.058	85.8529	43.126	0.192801	0.141294	0.400112	0.256768	0.348083	0.101802	-0.00108599	0.0799808	0.231641	0.284026	0.299044	-0.0537843	-0.159996	0.582174	-0.367625	0.364722	0.341273	-0.0742094	0.0700765	0.169653	0.154861	-0.332375	-0.0459652	-0.0722246	0.766584	0.208477	-0.650162	-0.645039	0.826677	0.514278	-0.386898	-0.354795	0.15891	0.239977	0.391637	0.444022	0.666668	-0.418506	0.186412	0.258165	0.340933	0.241877	-0.810143	0.275031	-0.810143
YBR130C	SHE3	174.944	105.503	62.3528	0.376761	-0.206025	0.537106	0.16107	0.96009	0.23741	0.256858	-0.375888	0.399807	0.119359	1.30479	0.152591	0.0450471	-0.343194	-0.256408	-0.255642	0.209044	0.388251	0.480409	0.468696	-0.0198703	0.345347	0.429131	0.309585	0.338597	0.370506	-0.306532	-0.36131	0.45315	0.662515	-0.0623515	-0.102848	0.211811	-0.420935	0.35476	0.0743123	1.5612	0.408232	0.228915	0.0429048	0.491483	0.159111	0.053472	1.20644	0.053472
YBR131C-A
YBR131W	CCZ1	81.8567	57.9931	47.9283	-0.760382	0.0995066	-0.434772	-0.310942	-0.508013	-0.695785	-1.33762	0.0251332	-0.79321	-0.692823	-1.10783	-1.26759	-1.41775	-1.19335	-1.4826	-1.47842	-0.425574	-0.691305	-1.0537	-0.573737	-0.858474	-1.23671	-1.3471	-1.02136	-0.71322	-1.22325	-1.76151		-0.464828	-0.795587	-1.43652		0.080131	1.44288	0.624537	0.724923	0.374768	0.21083	0.4329	0.545404	0.0894191	0.447625	-0.413707	-0.249769	-0.413707
YBR132C	AGP2	129.653	62.8764	27.6002	-0.346625	0.00147998	-0.134245	-0.416828	0.747246	0.897304	-0.757457	-0.10353	-0.424301	-0.875018	0.955011	1.15685		-0.838672	0.495317	-0.473854	0.894126	-0.235848	-0.452778	-0.821494	0.885418	-0.56925	-0.651343	-1.33769	-0.865203	-1.25766		-1.64258	-0.597472	-0.827063		-1.2406					0.459694	1.6307	0.00870814	0.333403		0.516197
YBR133C	HSL7	108.18	68.0405	47.2865	0.413197	0.276236	0.550339	-0.114665	0.12479	-0.262855	0.307947	0.257097	0.416051	-0.355093	-0.0679068	-0.608736	-0.265624	-0.697185	-1.05	-0.661598	0.164524	0.0481037	0.290198	0.106751	-0.0787004	-0.153129	0.208898	-0.152535	-0.424186	-0.116095	-0.887888	-0.641353	-0.212573	0.217333	-0.611422	-0.351522	0.573571	0.52272	0.681674	-0.0894693	0.982098	0.0528622	0.243225	0.201233	0.82032	0.259286	-0.628812	0.300424	-0.628812
YBR134W		84.4186	50.1742	25.401	0.207634	-1.11672	-0.102637	0.164221	-0.631643	0.0289142	0.019712	-1.57121	-0.385501	0.124781	-1.311	-0.164708	-0.924312	0.356466	-0.239081	0.387326	0.436496	0.175114	-0.507128	0.950613	0.280691	0.0330002	-0.714271	0.924881	-0.2139	-0.00662677	-2.4857	-0.961029	-0.0290448	0.317483	-2.1205	-0.635389	0.944024	-0.646899	0.538811	1.04909	-1.07192	-0.552034	0.155805	0.142114	1.40623	0.0257313	-1.09085	-1.61073	-1.09085
YBR135W	CKS1	84.5827	60.3336	29.3487	0.401816	-0.525119	-0.317248	0.485402	-0.341935	-0.216745	0.29199	-0.794709	-0.648945	0.677431	-0.834904	-0.538563	-0.0116645	0.296185	0.340029	0.23854	0.730937	0.482623	-0.218801	0.43859	0.669774	0.483645	-0.380436	0.271147	1.01293	1.56655	-1.92425	-0.263032	1.04167	1.75675	-1.59023	-0.0155785	0.303654	-0.783044	-0.63728	0.689096	-1.17493	-0.777103	0.0611623	-0.00102215	1.20979	0.167444	-0.139823	-0.537653	-0.139823
YBR136W	MEC1	150.68	108.346	117.605	-0.740121	-0.660844	-0.790322	-0.9916	-0.582424	-0.534256	-1.30921	-0.972853	-1.22966	-1.86402	-1.23011	-1.02177	-1.00895	-1.26705	-0.966326	-0.678348	-0.621952	-0.672249	-1.03017	-1.1566	-1.11797	-1.20878	-1.31986	-1.76555	0.378097	0.508235	-0.726104	-0.584928	0.487624	0.788521	-0.458622	-0.301417	-0.300258	0.0360951	-0.220712	-0.855071	-0.263787	-0.343419	0.496022	0.536533	-0.86124	0.608944	-0.122706	-0.0430751	-0.122706
YBR137W		239.595	154.185	92.8776	-1.40469	-0.233872	-0.221265	0.127803	0.0103245	-0.0367454	-2.24104	-0.412437	-0.531122	0.0621171	-0.256015	-0.264632	-0.630542	0.504296	0.741502	0.722466	0.0994615	0.125723		-0.113922	-0.164676	-0.0393799		-0.434284	1.20829	0.734771		-0.475251	1.21218	0.995776		-0.204026	-1.6105	0.218105	0.0994204	0.692659	-0.997517	-0.987098	0.264138	0.165103		0.320362	-1.08652	-1.09694	-1.08652
YBR138C		52.6957	46.0613	22.7644	-0.0387531	-1.24221	-1.33304		-0.419424	-0.262483	-0.325766	-1.73591	-1.89587		-0.962247	-0.60817			0.558401	-2.0734	-0.504689	-0.150051		-0.163628	-0.963019	-0.443519		-0.497747	-1.13418	-0.648902			-0.832222	-0.270124							-1.52065	1.46524	0.45833	0.293467		0.334119
YBR139W		221.76	107.359	50.6949	-0.0631948	-1.01231	-0.674826			0.371426	-0.360037	-1.43416	-1.08788			0.356543	-0.493767	0.000474954	0.274198	-0.63908	-0.258307	-0.6269	-1.16867		-0.637442	-1.14233	-1.48023		-0.000345387				0.157336				0.13373	-0.940395	-0.594117			0.995623	0.379136	0.515425			1.58974		1.58974
YBR140C	IRA1	201.592	160.402	97.8736	-0.144495	-1.1695	-0.852725	-0.0375777	0.702582	0.293204	-0.474034	-1.64048	-1.30626	-0.22245	0.881612	0.237501	-1.10514	-0.79667	-0.322182	-0.0735678	-0.122764	0.0502094	-0.302121	0.280388	-0.458331	-0.150043	-0.476908	0.0691593	0.196583	0.182517	-0.244084	-0.434515	0.329206	0.490528	-0.00337185	-0.167853	0.631102	-0.535343	-0.201126	0.882686	1.20379	0.311068	0.335568	0.200252	-0.473536	0.211229	0.512195	1.40492	0.512195
YBR141C		57.8145	44.8857	31.3075	1.08706	0.893947	-0.372236	0.0997588	-0.493794	-0.392888	1.25283	1.06786	-0.716444	0.0138622	-1.08446	-0.806626	-0.373937	0.107798	-0.424724	0.137158	-0.00909069	0.201286	0.285836	-0.313106	-0.308121	0.0713551	0.203848	-0.688596	0.0118003	-0.115283	-0.606959		0.167936	0.218076	-0.346094		1.62676	1.4418	-0.342507	0.387799	-0.659739	-0.943784	0.29903	0.129931	0.549942	0.37549	-0.601277	-0.317232	-0.601277
YBR141W-A
YBR142W	MAK5	80.8944	68.7094	46.8797	0.563099	-0.0241912	0.352762	-0.147163	-0.864361	-1.03666	0.518136	-0.137224	0.173518	-0.411012	-1.69344	-1.78635	0.313779	-1.09898	-1.82322	-0.734742	-0.236832	0.205171	0.580014	-0.294315	-0.609065	0.0770482	0.544457	-0.664605	0.347578	0.402599	0.43137		0.460988	0.691877	0.63457		0.204358	-0.451003	-0.140261	-0.724791	0.129785	-1.05161	0.372233	0.128123	-0.0901129	0.37029	-0.911345	0.270045	-0.911345
YBR143C	SUP45	105.381	80.4746	45.9115	0.356407	0.62928	1.37888	0.480068	0.686706	0.389718	0.228319	0.720478	1.43311	0.668253	0.855522	0.384381	0.357106	-0.0639653	0.770718	0.224903	0.992465	1.32401	1.73186		1.01537	1.71668	1.8781		-0.12622	0.0113837	0.551104	0.101461	0.0474782	0.33396	0.747655	0.308086	-0.128787	0.363372	1.07601	0.311147	0.0848039	0.159477	-0.022901	-0.392663	1.13044		-0.916531	-0.991204	-0.916531
YBR144C		177.388	124.151	86.4833	-0.441388	-0.965738	0.0354123	-0.574308	-0.554565	-0.152556	-0.89033	-1.37304	-0.216041	-1.14599	-1.18433	-0.440878	-0.826244	0.281191	0.661863	0.508688	-0.513297	-0.306754	-0.58712	-0.151322	-0.974394	-0.673161	-0.806888	-0.482035	-0.053893	-0.336453	-1.09835	-1.17638	0.110602	0.0157304	-0.810198	-0.82662	-0.064086	-0.546792	0.610203	-0.319748	-1.84619	-0.949566	0.461097	0.366407	0.00330984	0.330713	-1.55977	-2.4564	-1.55977
YBR145W	ADH5	109.271	63.3908	32.9527	0.894845	-0.292729	0.338983	-0.414649	-0.00715201	-0.0911541	0.983302	-0.489689	0.156603	-0.871269	-0.284735	-0.347433	-1.02032	-0.214273	0.115676	0.0878374	0.064181	-0.916108	1.43247	-0.313443	-0.211297	-1.56615	1.53145	-0.689027	-0.324483	-0.39542	0.727946	-1.11763	-0.125557	-0.038218	0.914676	-0.774452	2.00362	0.530633	1.17693	0.149054	-0.400411	-0.435271	0.275478	0.650042	0.616777	0.375584	-1.6122	-1.57734	-1.6122
YBR146W	MRPS9	194.295	130.361	73.5661	0.348497	0.413403	0.142051	0.368338	0.935285	0.351688	0.217226	0.437133	-0.0851374	0.476002	1.26403	0.326505	-0.0853193	0.350766	0.544455	0.474322	0.577884	0.477391	0.0399588		0.467525	0.475977	-0.0808365		0.409529	0.554857	-0.338527	-0.350106	0.515055	0.831176	-0.0925696	-0.0928987	0.302546	0.522452	0.000181939	0.561321	0.719572	-0.147817	0.110358	0.00141337	0.011733		-0.147999	0.71939	-0.147999
YBR147W		94.1097	50.4712	40.5477	-0.971548	-1.08396	-1.22879	-1.02883	-0.0670981	-0.0690757	-1.63371	-1.52821	-1.76789	-1.92808	-0.383248	-0.313833		-0.939256	0.345777	-0.393562	-1.14188	-0.99746	-1.67572	-1.64535	-1.80503	-1.68537	-2.0673	-2.38957	-0.890014	-1.17007			-0.619127	-0.74693							-0.729025	0.0797284	0.663144	0.687909		0.744216
YBR148W	YSW1	44.3357	18.9261	16.3032	-1.04799	-1.56102	-1.34406	-0.013848	-0.0448847	-0.583602	-1.7409	-2.15436	-1.90939	-0.181619	-0.346744	-1.09686		-1.5157	-1.91198	-2.01169	-0.945073	-1.125	-1.2893	-0.626102	-1.54496	-1.87227	-1.6199	-1.08822	-1.52253	-2.03108			-1.17116	-1.53465							1.56523	0.91483	0.599883	0.747272		0.462118
YBR149W	ARA1	223.793	105.285	58.3993	-0.0365296	0.179117	0.149216	0.209835	1.08054	1.324	-0.322648	0.129624	-0.0763419	0.203268	1.50273	1.80621	-0.333706	0.774229	0.8968	0.560868	0.228224	-0.22597	0.0566289	-0.30879	0.00547418	-0.554776	-0.0615353	-0.683085	2.43147	1.25907	-0.0736144		2.27971	1.47545	0.157631		0.011058	0.46333	0.257364	0.536974	0.605935	1.24534	0.22275	0.328805	-0.219166	0.374296	0.987979	0.348571	0.987979
YBR150C	TBS1	215.396	114.577	66.0297	-0.122178	-0.38201	-0.195338	0.160952	1.2308	0.274301	-0.442742	-0.606873	-0.499295	0.119156	1.74967	0.208733		-0.312951	-0.602618	-0.474622	0.428407	0.450711	-0.812687	0.239014	0.270002	0.436879	-1.06806	0.0163341	0.444556	0.247681	-0.757414	-0.2599	0.545625	0.550145	-0.488194	-0.0127968					2.35229	0.683355	0.158405	0.0138318	-0.579863	0.22268
YBR151W	APD1	265.144	168.447	82.0666	0.790061	0.107026	-0.240386	0.00147855	0.719757	0.675385	0.836377	0.0350032	-0.554594	-0.155247	0.909837	0.819121	0.00429847	0.579224	0.879074	0.428624	0.16495	0.107658	0.472069	-0.205469	-0.0781375	-0.0658537	0.419474	-0.551169	1.38308	1.2543	-0.396391	-0.0940897	1.36473	1.47108	-0.14722	0.13444	0.832078	0.0307048	-0.558892	-0.159545	0.0307633	0.390497	0.243088	0.173512	0.566694	0.3457	0.949389	0.589656	0.949389
YBR152W	SPP381	83.7646	60.2648	34.8176	-0.742339	-0.615153	-0.671914	-0.050787	-0.299303	-0.613611	-1.31232	-0.912882	-1.08431	-0.245179	-0.764844	-1.14253	-0.0553255	-0.459552	-0.121045	-0.444438	-0.141776	-0.0979317	-0.395605	0.450142	-0.483455	-0.367139	-0.585146	0.285895	1.13578	1.26719	-0.946594	0.154985	1.14889	1.48287	-0.666867	0.355615	-1.25699	-0.857556	-1.02898	-0.189854	-0.643798	-0.698095	0.341679	0.269207	0.0817212	0.164247	0.33089	0.385187	0.33089
YBR153W	RIB7	263.661	219.215	133.42	-0.367985	1.60439	0.410658	0.706879	-0.61263	0.154328	-0.787406	2.00034	0.244588	1.05852	-1.27975	0.0261533	0.67459	0.812149	0.390224	0.72559	0.743893	0.560064	0.637493	0.407198	0.686895	0.597133	0.611007	0.231066	1.63006	1.83573	1.03816	1.08041	1.58028	2.00302	1.20766	1.17737	-1.462	1.32575	-0.430002	0.383932	-1.66998	-0.699437	0.0569977	-0.0370686	-0.596656	0.176132	-0.269434	-1.23997	-0.269434
YBR154C	RPB5	187.705	141.129	73.5254	-0.0587047	1.18	1.90142	0.811258	0.95991	0.349217	-0.353741	1.44332	2.07455	1.23812	1.3045	0.322745	1.27349	0.486004	0.471456	0.99344	1.14894	1.38721		0.766289	1.22213	1.80929		0.689543	1.8202	1.93731		1.64911	1.74622	2.09596		1.68238	-1.62723	0.169831	0.801061	-0.0353643	0.833039	-0.670696	-0.073196	-0.422079		0.0767464	-1.47176	0.0319781	-1.47176
YBR155W	CNS1	65.4408					-0.276458						-0.598873					-1.31316	-0.341351	-0.786996			0.19402				0.0975406				-0.163028				0.0731829										0.0243578
YBR156C	SLI15	58.884	46.8581	29.1662	0.259811	-0.225208	-0.808775	-0.12882	-0.81589	-0.763565	0.0928733	-0.401066	-1.25231	-0.379449	-1.61378	-1.37074	-0.580928	-1.38056	-2.31047	-1.64473	-0.513108	-0.242214	-0.253529	-0.105769	-0.974145	-0.578581	-0.420646	-0.423874	0.199867	-0.20091	-0.822837	-0.789538	0.332072	0.139736	-0.549983	-0.483108	0.673801	0.179862	-0.671385	0.201478	0.696687	0.27399	0.461037	0.336366	0.129337	0.318106	0.945374	1.36807	0.945374
YBR157C	ICS2	227.531	148.108	94.9257	0.961528	0.214252	0.882134	-0.392291	0.012657	0.33433	1.0768	0.175741	0.823342	-0.832799	-0.252182	0.300089	0.119449	1.0052	0.92761	1.56637	0.625822	0.0469638	0.490021	0.524727	0.530873	-0.154799	0.44026	0.381123	1.93411	0.825961	-0.483504	-0.090577	1.84564	1.0792	-0.229495	0.137559	0.957355	0.0562918	0.703893	-0.952248	-1.17979	-1.26629	0.0949493	0.201763	0.669755	0.143604	-1.97018	-1.88369	-1.97018
YBR158W	AMN1	62.0591	33.7666	17.7804	0.552822	1.01896	1.00293	1.43287	1.19062	0.47046	0.503726	1.23194	0.971621	2.30772	1.68364	0.507257	1.58146	-0.16479	-0.388273	-0.0920016	1.38345	0.843112	1.02853	1.53157	1.53202	1.01193	1.06377	1.66663	1.05015	0.551052	0.721617	1.11424	1.07416	0.827694	0.908698	1.20742	-1.07773	-0.349518	-0.609838	0.726259	2.07191	0.599259	-0.148575	-0.168818	0.155068	-0.13506	1.2091	2.68175	1.2091
YBR159W		82.9061	47.1034	27.3426	0.205814	0.175516	-0.105238	-0.0676457	0.363741	0.439408	0.0171605	0.124898	-0.388694	-0.274188	0.324775	0.460001	-0.422085	-0.0554542	-0.48716	-0.0306374	0.461552	0.315524	0.198213	1.65454	0.313802	0.238767	0.102395	1.82363	1.48994	1.70443	-0.138742		1.45799	1.8829	0.0961205		0.439246	0.546983	0.0333911	0.147898	0.811935	0.490639	0.147751	0.0767572	0.00627455	-0.169093	0.457248	0.778544	0.457248
YBR160W	CDC28	78.848	56.2565	34.9521	0.544499	0.239655	0.260715	-0.434704	-0.26352	-0.333859	0.492056	0.209083	0.0605264	-0.905777	-0.70604	-0.716793	0.206663	0.0364207	0.204344	-0.199686	0.518483	0.495876	-0.239264	0.0537341	0.389031	0.503068	-0.404129	-0.220226	1.14196	1.16684	-0.090282		1.15429	1.39106	0.141889		0.285393	0.0024195	-0.146137	-1.11244	-0.910384	-0.517107	0.129452	-0.00719116	-0.546018	0.27396	-0.37097	-0.764247	-0.37097
YBR161W	CSH1	89.8202	56.058	60.4132	-0.404485	-0.346527	-0.569998	-0.139414	0.118013	0.367244	-0.838586	-0.560301	-0.959204	-0.397679	-0.079044	0.350178	-1.32326	-0.576642	-0.202248	-0.64848	-0.201009	0.00330451	0.0117234	-0.0459587	-0.561727	-0.218781	-0.113528	-0.347511	-0.383503	-0.20236	-1.12179		-0.177066	0.13841	-0.832331		0.484671	0.762956	0.364054	0.925579	0.123204	0.998658	0.360718	0.222085	0.718803	0.301552	0.634605	-0.240849	0.634605
YBR162C	TOS1	94.1364	63.8554	36.8057	1.29675	1.24402	1.9318	0.929325	0.956964	0.372209	1.54685	1.52735	2.11184	1.44128	1.29965	0.357734	0.362931	0.515587	0.656817	0.309794	1.51495	1.09204	1.45421	1.46466	1.70579	1.37672	1.55663	1.5812	0.976552	0.696168	0.388012	0.146647	1.00993	0.960458	0.593621	0.34821	1.18391	1.16441	1.74891	1.07835	0.642837	0.04794	-0.190844	-0.284685	0.963005	-0.116542	-1.70097	-1.10608	-1.70097
YBR162W-A	YSY6	1550.59	1060.96	681.257	0.521433	0.538654	1.77439		1.30881		0.459713	0.601529	1.91862		1.87787			1.49926	2.54464	2.376	0.790676				0.748715				0.98959	0.895187	1.9696	0.775101	1.02131	1.14254	2.08738	0.906268					-0.666772		0.0419603
YBR163W	DEM1	158.763	104.107	52.7482	-0.982354	-0.467721	0.397638	1.07195	0.622954	0.0956858	-1.64886	-0.719372	0.228604	1.68669	0.750754	-0.0630916	-1.23601	-0.969616	-0.679907	-0.548588	-0.399961	0.488651	0.291608	0.383149	-0.824629	0.49248	0.210531	0.200361	-0.280382	-0.268539	-0.734601	-1.49184	-0.0870669	0.0778639	-0.466647	-1.10674	-0.41285	0.516637	1.46461	2.9227	1.43066	0.485497	0.424668	-0.00382817	0.677179	0.182788	-0.979117	-0.033952	-0.979117
YBR164C	ARL1	100.605	74.1926	36.2151	0.232505	0.128968	0.322852	0.151527	0.10459	-0.162084	0.0545863	0.0638027	0.136802	0.102938	-0.101104	-0.455377	0.122126	-0.154755	0.235043	0.350547	0.268863	0.308085	0.426943	0.0634592	0.0591766	0.227865	0.367226	-0.207809	1.16519	1.46392	-0.614049	0.215667	1.17456	1.66286	-0.35279	0.4095	-0.0675396	-0.0583232	0.0146765	-0.0191875	-0.336146	-0.805925	0.209687	0.0802199	0.720016	0.271268	-0.820601	-0.350823	-0.820601
YBR165W	UBS1	110.854	70.274	36.0104	-0.519466	-0.0482419	0.940498	0.0977778	-0.176839	-0.225733	-0.999809	-0.168792	0.894986	0.0104535	-0.563592	-0.552242	-0.696031	-0.28999	-0.0672452	-0.193845	0.133239	0.262011	0.889676	-0.280713	-0.120042	0.160345	0.902994	-0.647237	0.100898	0.0690694	-0.955442	-0.738713	0.245696	0.386736	-0.675224	-0.437976	-0.303778	0.527239	1.59102	0.706484	-0.496346	-0.358397	0.253281	0.101666	1.57822	0.366525	-1.94941	-2.08736	-1.94941
YBR166C	TYR1	75.9492	56.6845	25.9994	-0.65604	-0.0236851	0.208144		0.54238	-0.0607553	-1.19131	-0.13656	-0.00400584		0.618344	-0.301171	-0.607055	-0.865557	-0.421024	-0.343509	-0.122946	-0.13809	-1.05729		-0.458572	-0.42599	-1.35127		-0.410247	-0.0450809	-1.10515		-0.200408	0.282302	-0.816614		-0.584256	0.470495	0.603049		1.03937	0.0423379	0.335626	0.2879	-0.534656		-0.560711	0.436318	-0.560711
YBR167C	POP7	94.5835	62.1053	37.6606	0.516974	-0.208889	-0.17621	0.0389872	0.363972	-0.0471099	0.453461	-0.379646	-0.475814	-0.0907064	0.325155	-0.280405	-0.552582	0.0984294	-0.172797	0.23063	0.323631	0.110943	-0.215146	0.120239	0.131548	-0.0610396	-0.376205	-0.135314	0.816493	0.55743	-0.582945	-0.526399	0.870236	0.83353	-0.323414	-0.249445	1.00604	0.172935	0.0767672	0.461875	0.497952	-0.511035	0.192083	0.171983	-0.0527903	0.255553	-0.587803	0.421185	-0.587803
YBR168W	PEX32	43.8558	30.6891	23.6832	-0.894618	-0.279251	-0.380973	0.0178459	-0.0151435	-0.0908868	-1.52584	-0.471999	-0.72717	-0.127084	-0.297868	-0.347027	-1.76273		-0.772509	-1.78157	-1.06324	-0.819226	-0.925507		-1.7011	-1.42417	-1.19868		-0.996097	-0.873552	-2.4069	-2.30942	-0.711711	-0.475653	-2.04607	-1.83274	0.236896	1.29073	1.03556	1.63565	0.474641	1.43454	0.637865	0.604947	0.847388		0.398974	-0.560924	0.398974
YBR169C	SSE2	288.026	158.386	199.99	0.189519	-0.11682	-0.179256	-0.505387	-0.196972	1.03652	-0.00568841	-0.258803	-0.479554	-1.0274	-0.596678	1.36871	-0.343528	-0.0270513	0.216061	0.734485	-0.654918	-0.446993	-0.820886	-0.807482	-1.16154	-0.878677	-1.07755	-1.3198	2.69734	2.50953	-1.64335		2.51176	2.61947	-1.32493		0.337839	0.084725	-0.136026	-0.683874	-0.812739	0.634227	0.506619	0.431684	0.247378	0.512318	0.770253	-0.676713	0.770253
YBR170C	NPL4	277.991	195.171	114.22	0.185351	-0.151163	-0.0280807		0.174045	0.199143	-0.0115323	-0.303879	-0.293981		0.0130366	0.0943546		-0.167264	-0.528344	-0.52065	-0.53809	0.317275		-0.105783	-1.00716	0.241333		-0.423892	0.139678	0.317599	0.0791302	-0.3505	0.279542	0.614112	0.301893	-0.0932486					0.54138	0.615005	0.469066	0.075942		0.318109
YBR171W	SEC66	136.433	111.142	175.79	-0.363515	0.153052	-1.52288	0.11085	0.0627605	-0.18672	-0.781139	0.0954132	-2.1289	0.0329461	-0.169844	-0.492869	-0.565356	0.599176	0.0925415	0.113128	0.0643674	0.335259	0.154004		-0.211051	0.267688	0.0512091		0.3582	0.296585		-0.455849	0.470259	0.594886		-0.186797	-0.215783	0.660769	-1.56354	0.598302	-0.262386	-0.605997	0.275418	0.0675711			0.957544	1.30116	0.957544
YBR172C	SMY2	297.822	256.217	165.757	0.549957	0.5221	0.543877	0.60461	0.468333	0.0366198	0.49971	0.579801	0.408118	0.882549	0.496658	-0.152981	1.19457	-0.0933165	-0.83243	-0.467454	1.05403	0.972745	1.25015	0.739739	1.09673	1.2019	1.32036	0.655645	1.88278	2.01058	0.982186	1.34275	1.80084	2.16299	1.1548	1.41033	-0.694862	-0.61477	-0.786453	-0.312022	1.32909	0.314473	-0.0426913	-0.229158	0.16556	0.0840947	1.10093	2.11554	1.10093
YBR173C	UMP1	1010.87	772.132	462.096	0.654583	0.968499	1.07282	0.559028	0.265942	1.275	0.646413	1.16571	1.05742	0.804118	0.164055	1.73165	1.62714	2.31652	2.29204	2.36135	0.824482	0.533159	0.457539	0.927426	0.793389	0.557703	0.402651	0.895277	2.0973	1.73734	1.29261	1.61644	1.98806	1.91301	1.44798	1.65337	-0.98073	-0.461428	-0.569726	-0.823025	-2.12798	-0.629703	0.0310937	-0.0245448	-1.04533	0.0321488	-0.0599769	-1.55826	-0.0599769
YBR174C		910.815	524.55	238.334	0.947629	0.82966	1.33186	0.672337	0.317623	1.33131	1.05732	0.983483	1.3754	0.999087	0.248986	1.81734	0.414377	1.89095	2.68473	2.57505	0.594601	0.472554	1.05894	0.647116	0.489616	0.46889	1.09898	0.537386	0.181101	-0.102739	-0.254333	-0.268682	0.315694	0.229551	-0.0130515	-0.0205955	0.642938	0.569107	0.961022	0.584711	-2.43574	-0.757709	0.104985	0.00366443	1.11203	0.10973	-1.71873	-3.39677	-1.71873
YBR175W	SWD3	133.825	108.027	80.4049	0.309618	1.46771	0.333038	-0.336205	0.0225879	-0.429328	0.162712	1.82094	0.149306	-0.736292	-0.235862	-0.862083	-0.298303	0.253343	-0.444051	-0.171037	-0.121375	0.109289	0.0143349	0.0933266	-0.456496	-0.0634641	-0.110505	-0.169675	0.506819	0.331838	-1.01935	-0.515599	0.599966	0.627139	-0.735579	-0.239854	0.461015	2.11924	0.447608	-0.437989	0.208189	-0.691045	0.335121	0.172753	0.625074	0.263002	-1.13865	-0.239419	-1.13865
YBR176W	ECM31	155.561	98.3007	61.8114	0.294197	0.996467	0.795781	-0.490627	0.243512	-0.323022	0.141089	1.20242	0.71734	-1.002	0.127196	-0.700301	-1.36177	-0.36039	-0.115784	0.332253	-0.311181	-0.207311	-0.751281	-0.636488	-0.707311	-0.52743	-0.996959	-1.10148	0.088196	0.256504	-1.81689	-1.44379	0.234611	0.558217	-1.48883	-1.06408	1.50286	2.56419	2.07911	0.359764	0.24298	-1.03255	0.396131	0.32012	0.491873	0.464992	-3.11166	-1.83613	-3.11166
YBR177C	EHT1	15.7655	8.49653	6.18173	-0.0113834	0.568804	0.445982	0.326125	0.757175	0.26755	-0.287388	0.641101	0.287949	0.403366	0.971328	0.198459		-1.18811	-0.215722	-1.34208	0.0584709	-0.161567	0.404814	0.459016	-0.218843	-0.460394	0.341604	0.297226	-1.47326	-1.34269	-2.33836	-2.41662	-1.12816	-0.904857	-1.98134	-1.92794					1.18705	1.54054	0.277313	0.298827	2.32295	0.16179
YBR178W		596.672	349.813	194.85	0.635	-0.0822946	0.932864	0.768096	-0.0543064	1.09274	0.618954	-0.213487	0.885614	1.16386	-0.362227	1.45427	-0.350199	1.39194	2.02193	2.22238	0.452	0.122721	0.46159	0.876246	0.301179	-0.0437793	0.407342	0.829932	-0.00807208	-0.105717	-0.428819	-1.20182	0.150592	0.226827	-0.177848	-0.849206	0.969153	0.136712	1.23581	1.51406	-2.38415	-0.768108	0.150821	0.166501	0.58519	0.0463139	-2.00392	-3.61997	-2.00392
YBR179C	FZO1	118.639	92.7048	63.3047	0.624068	0.527133	0.0544523	0.413911	0.123863	-0.0376238	0.603626	0.586407	-0.192668	0.554418	-0.0694305	-0.265968	-0.673909	-1.47855	-0.915873	-1.33738	-0.618388	-0.0421204	-0.282184	0.18524	-1.11326	-0.285349	-0.453823	-0.0523234	-1.31902	-1.11941	-1.41114	-1.43369	-0.993546	-0.700586	-1.10561	-1.05511	1.27753	1.26032	0.48124	1.22833	0.846443	1.07141	0.494877	0.243229	0.651789	0.237563	0.590167	0.365202	0.590167
YBR180W	DTR1	65.7216	39.5817	22.4921	0.0223993	-1.14317	-0.575265	-1.14031	-0.775392	-0.972555	-0.240019	-1.60592	-0.96567	-2.1199	-1.54723	-1.68879	-1.4781	-1.32608	-1.36282	-1.70427	-0.920289	-0.818256	-1.12722	0.378744	-1.51221	-1.42275	-1.43223	0.194737	-1.1967	-0.936925	-1.5002	-1.74344	-0.886791	-0.533632	-1.18973	-1.33016	1.23808	-0.127823	0.512425	-0.641804	-0.184411	0.0154771	0.591917	0.604495	-0.242507	0.184007	-0.496948	-0.696836	-0.496948
YBR181C	RPS6B	85.7411	98.8203	47.0934	2.04236	1.64416	2.20788	1.73461	1.0622	0.34747	2.59232	2.05255	2.45074	2.82692	1.4726	0.320084	0.976745	0.608985	0.343144	0.395482	1.66605	0.81383	1.92899	2.06544	1.90546	0.969019	2.10634	2.34826	0.859626	0.097099	2.32853		0.90788	0.41238	2.42637		1.61558	1.0758	1.474	1.85018	1.12945	-0.0753974	-0.239411	-0.155188	-0.320022	-0.282818	-1.54939	-0.344544	-1.54939
YBR182C	SMP1	191.569	142.98	84.5456	-0.269663	-0.485673	-0.147284	-0.418889	-0.324155	-0.582084	-0.649542	-0.742935	-0.440307	-0.878566	-0.805684	-1.09455		-0.677997	-0.683277	-0.988593	-1.04119	0.0123952	-0.684474	-1.13296	-1.67196	-0.205459	-0.919608	-1.73536	1.3166	0.681122			1.30671	0.946693							-0.122407	-0.10596	0.630777	0.217854		0.602401
YBR182C-A
YBR183W	YPC1	306.784	154.976	98.048	-0.34485	-0.429376	-1.03694	-0.285539	0.500332	0.2714	-0.754967	-0.669042	-1.53239	-0.649113	0.549242	0.204318	-1.2318	0.339961	0.670761	0.37899	0.272613	-0.0649514	-0.738845	-0.571786	0.0641313	-0.318807	-0.98256	-1.01887	2.73761	2.45005	-2.35949		2.5469	2.56505	-2.0013		0.476829	0.562754	-0.300591	0.582683	-0.121519	-0.174672	0.208482	0.253856	1.01874	0.447085	0.125919	0.179072	0.125919
YBR184W		39.6671	25.5178	22.0456	-0.542201	-1.06578	-0.458794		0.0423175		-1.03169	-1.50434	-0.822697		-0.203439							-0.147931	-0.326478			-0.440412	-0.505109				-1.46903				-1.16029									0.292481	0.65518
YBR185C	MBA1	94.8502	64.8237	40.1364	-0.848202	-0.706891	0.576183	-0.415422	-0.290524	-0.164083	-1.46075	-1.03329	0.447775	-0.8726	-0.750418	-0.458421	-0.829716	0.240463	0.392871	-0.246217	-0.704313	-0.149355	-0.245889	-0.651424	-1.22681	-0.442498	-0.411801	-1.12055	0.338858	0.453449	-1.23177	-0.709705	0.453377	0.738399	-0.936211	-0.412218	-0.631038	-0.203574	1.27749	-0.0428841	-1.14329	-0.212204	0.522496	0.293143	0.52441	0.469126	-1.48969	-2.42078	-1.48969
YBR186W	PCH2	78.2138	47.6122	38.6211	-0.420719	-0.392595	-0.453625	-0.198963	-0.476312	-0.531382	-0.861349	-0.620767	-0.816352	-0.500142	-1.05573	-1.01739	-2.26095	-1.79825	-1.46089	-1.50035	-0.426198	-0.588034	-0.46848	-0.610607	-0.859299	-1.08537	-0.669523	-1.06844	-2.24505	-2.14702	-2.24494		-1.80174	-1.64073	-1.89311		1.3996	1.64018	1.44459	1.7608	0.405153	0.482963	0.433101	0.497334	1.22358	0.457829	-0.961632	-1.03944	-0.961632
YBR187W		185.553	108.601	54.1375	0.465625	0.551281	0.846926	0.336845	-0.0800144	-0.0172638	0.38146	0.618102	0.780123	0.421813	-0.404474	-0.234984	1.0745	1.09197	0.327918	0.61368	0.832911	0.420841	1.1368	1.78976	0.804527	0.393105	1.18912	1.99628	1.75299	1.74416	0.155469	1.28206	1.68757	1.91925	0.373992	1.35644	-0.693039	-0.456397	-0.294377	-0.652687	-0.732392	-0.848664	0.0283845	0.0277355	0.815129	-0.206519	-0.554287	-0.438016	-0.554287
YBR188C	NTC20	174.132	93.3669	43.0819	0.765163	0.0444452	0.693848	0.240987	-0.349241	0.558109	0.801465	-0.0471367	0.592213	0.256872	-0.84691	0.640645	-0.356015	0.660288	1.33103	1.23535	0.59429	0.240481	0.623843	0.884017	0.489205	0.128793	0.595204	0.839854	0.25705	0.558966	-0.514911	-0.367974	0.381979	0.834934	-0.259158	-0.108765	1.15748	0.308878	0.948228	0.612886	-2.17794	-0.594709	0.105085	0.111687	0.854362	0.044163	-1.54294	-3.12617	-1.54294
YBR189W	RPS9B	174.378	206.124	99.4248	2.13596	2.16108	2.68592	2.13323	0.747681	0.577275				3.51282				1.12074	0.510659	0.662526	2.36978	1.51553	1.99733				2.18547		1.31358	1.93038	2.60486		1.30407	2.08961	2.68736										-0.501887
YBR190W		204.132	110.185	48.1398	0.714495	-0.311711	0.331793	0.810131	-0.443164	-0.294491	0.73042	-0.514603	0.147777	1.23619	-1.00126	-0.656881	-0.658485	0.884031	1.48332	1.38553	0.648636	0.394497		-0.348295	0.56102	0.354499		-0.733525	-0.0425141	0.39516		-0.717771	0.120533	0.685071		-0.41938	1.3889	0.143882	0.806262	1.89467	-2.48458	-2.04241	0.0876161	0.0399977		0.38523	-2.84868	-3.29084	-2.84868
YBR191W	RPL21A	246.179	339.29	58.0544	1.58711	1.96366	1.926	1.63519	0.721104	0.326661	1.95397	2.47189	2.10472	2.65585	0.91205	0.288417	2.10174	1.07587	0.54968	1.32469	1.88644	1.54395	2.39872	1.96483	2.19669	2.03898	2.65021	2.2198	1.78996	1.90204	1.94704	2.26085	1.71983	2.06369	2.06607	2.22559	-0.147769	0.370152	0.00298018	0.55411	0.36237	-1.03628	-0.310252	-0.495035	0.584146	-0.254972	-1.03926	0.35939	-1.03926
YBR191W-A
YBR192W	RIM2	173.742	110.386	55.6521	-0.0883323	0.600826	-0.223979	0.394789	0.547231	0.364153	-0.395284	0.683131	-0.534453	0.521514	0.626315	0.345474	0.505202	0.0696133	-0.152139	0.241935	0.371829	0.324724	0.475973	0.403587	0.195239	0.252249	0.423994	0.226455	0.771502	0.855172	-0.139976	0.333527	0.830969	1.10593	0.0949549	0.514157	-0.900487	0.177929	-1.03966	0.0163121	0.778454	0.103539	0.17659	0.0724749	0.329039	0.177132	1.14319	1.81811	1.14319
YBR193C	MED8																						-0.165875				-0.319158
YBR194W		913.042	562.943	257.737	0.966273	0.376546	1.19008	1.11891	0.413033	1.92081	1.08346	0.388757	1.20135	1.7675	0.40578	2.71447	0.854431	1.85019	2.69234	2.53009	1.00045	0.669341	1.22544	1.16203	1.02592	0.757274	1.29175	1.19481	1.13225	0.958744		0.288364	1.14581	1.20068		0.474053	0.229025	-0.465674	0.34692	0.913068	-2.28656	0.184381	-0.025469	-0.0879333		-0.0327829	-0.162539	-2.63348	-0.162539
YBR195C	MSI1	130.814	94.4805	41.5542	-0.0398613	-0.0380515	-0.276449	-0.158289	0.554031	-0.157569	-0.32732	-0.155416	-0.598862	-0.430156	0.63749	-0.448506	-0.561778	-0.850791		-1.37583	-0.0332813	-0.17285	0.215212	0.346292	-0.340087	-0.476929	0.122077	0.153303	-0.98375	-0.357505		-0.963067	-0.700935	-0.00353012		-0.637199	0.234458	0.406362	-0.0370846	0.131622		0.927323	0.306805	0.304079		0.192989	0.964408		0.964408
YBR196C	PGI1	862.469	457.961	286.828	1.57509	1.65539	1.72088	1.10552	1.81267	1.47398	1.93713	2.06729	1.85293	1.74445	2.70588	2.03447	2.628	1.27022	1.83199	1.31301	1.51597	1.43689	1.45977	1.66809	1.70714	1.8821	1.56307	1.84094	2.74861	3.02337	2.1728	2.42657	2.5565	3.08958	2.27929	2.37275	-0.690867	-0.560708	-0.775069	-0.883548	0.873895	0.721458	-0.19117	-0.445205	-0.71622	-0.172845	1.49653	1.64896	1.49653
YBR196C-A
YBR196C-B
YBR197C		213.396	154.821	95.6598	0.44134	-0.226746	0.478108	0.398719	-0.0238851	0.274532	0.347409	-0.403084	0.327385	0.528277	-0.312234	0.209085	0.738056	1.04242	0.726254	0.582373	0.902555	0.491716	0.211585	0.677316	0.896557	0.49697	0.117878	0.575944	1.28769	1.37326	0.355333	0.876449	1.28148	1.57991	0.562756	0.996264	-0.390648	-1.14114	-0.410672	-0.209779	-1.03849	-0.373287	0.00599869	-0.00525441	-0.444878	0.101372	0.0373842	-0.627816	0.0373842
YBR198C	TAF5
YBR199W	KTR4	225.874	159.052	106.398	-0.648243	-0.831884	-0.29128		0.703876	0.317792	-1.18038	-1.19735	-0.617068		0.883739	0.27492	-0.197675	0.177413	0.629208	-0.229856	0.856785	0.224223	-0.401097	0.0219247	0.836074	0.104968	-0.591505	-0.260839	0.513069	0.0195639	-0.964743	-0.716563	0.605421	0.341444	-0.684009	-0.418307	-0.982702	-0.999673	-0.419393		0.254531	0.504775	0.0207107	0.119255	0.0925039	0.282764	0.924168	0.673925	0.924168
YBR200W	BEM1																						-0.881058				-1.14722				-1.75193				-1.42747										0.280255
YBR200W-A
YBR201C-A
YBR201W	DER1	631.387	360.426	176.953	0.376505	0.314777	0.898147	-0.581303	-0.406368	0.753945	0.256499	0.307683	0.842998	-1.15803	-0.94079	0.938677	-0.575568	0.804888	1.4614	1.56336	-0.232161	-0.375675	-0.268176	0.006922	-0.602893	-0.774163	-0.437604	-0.279994	1.17928	0.588359		-0.936795	1.18686	0.861826		-0.61387	0.832068	0.883251	1.41857	-0.582461	-2.40219	-0.624688	0.370732	0.398488		0.286916	-2.04325	-3.82076	-2.04325
YBR202W	CDC47	265.955	190.313	99.0834	0.476145	0.638674	0.146354	-0.299414	-0.0407612	-0.102542	0.396211	0.732808	-0.0798553	-0.672988	-0.339967	-0.364764	0.693036	-0.147361	-0.262559	-0.13265	0.380359	0.514758	0.148987	0.147452	0.206511	0.530737	0.0453995	-0.100569	1.59988	1.33861	-0.0948055	0.489827	1.55394	1.54822	0.137617	0.652949	-0.296824	0.0397721	-0.772891	-1.36602	-0.0774082	-0.232114	0.173849	-0.0159798	-0.092217	0.248022	0.540777	0.695483	0.540777
YBR203W	COS111	198.961	143.71	97.0483	-0.269626	-0.214695	-1.05216	-0.624667	0.696593	-0.0324493	-0.64949	-0.387267	-1.55108	-1.23264	0.87177	-0.258094	-1.62395	-1.44406	-0.572593	-1.41509	-0.259269	-0.466383	-1.51152	-0.95443	-0.638714	-0.907092	-1.87719	-1.50742	-0.919547	-1.00534	-2.1804		-0.644901	-0.596226	-1.83215		0.974457	1.23668	0.0728687	0.391303	1.44436	1.15699	0.379445	0.440709	-0.0450372	0.552989	1.08412	1.37149	1.08412
YBR204C		81.0977	46.8267	33.3387	-0.277049	-0.71473	-0.310174	-0.7085	-0.130888	-0.00563914	-0.659898	-1.04358	-0.640261	-1.37689	-0.488077	-0.217293		-0.751334	-0.930391	-0.670821	-1.09126	-0.691343	-0.846993		-1.73813	-1.23676	-1.10778		-0.568773	-0.816125	-2.08346		-0.338762	-0.423114	-1.7406						0.442313	0.453528	0.646872	0.545421	0.632823
YBR205W	KTR3	83.1435	58.6695	25.2151	0.199224	-0.737118	0.451216	0.173594	0.805669	0.184824	0.00791947	-1.07296	0.294374	0.140909	1.05102	0.0725633					0.130511	-0.0399715	-0.157687	0.455459	-0.123646	-0.2822	-0.309677	0.292684	-0.495155	-0.525852	0.231251		-0.274511	-0.157548	0.445565								0.254157	0.242229	-0.755243	0.162775
YBR206W		764.661	429.162	195.416	0.602532	0.684028	1.20247	0.239015	0.256173	0.655518	0.573428	0.792337	1.21657	0.253477	0.148002	0.788887	0.474308	1.71025	2.28899	1.97027	0.317098	0.286879		0.758698	0.122916	0.196788		0.67985	0.418546	0.274518		-0.173514	0.522925	0.574698		0.0639122	0.0991198	0.318029	0.742263	-0.220831	-2.14099	-1.18138	0.194183	0.0900904		0.0788476	-1.92365	-2.88325	-1.92365
YBR207W	FTH1	223.218	131.067	54.8805	-0.417766	0.471732	0.0706566	0.263452	0.667116	0.409628	-0.857207	0.513692	-0.172777	0.295525	0.82333	0.414681	0.279727	0.613197	0.265882	0.204441	0.626448	0.277771	0.691184	0.398685	0.5317	0.183441	0.673173	0.220196	0.731968	0.804063	0.54226	-0.164079	0.796466	1.05917	0.739303	0.0722902	-1.13693	0.233965	-0.452504	0.0157986	0.557447	0.210239	0.094748	0.09433	-0.0661299	0.178488	0.662743	1.00995	0.662743
YBR208C	DUR1,2	279.753	191.886	114.746	0.0839078	-0.6543	-0.102875	-0.165814	0.371705	0.162437	-0.153774	-0.964264	-0.385794	-0.443103	0.337862	0.0384932	-0.182877	-0.894799	-0.454734	-0.338299	0.495736	-0.0337984	-0.462853	0.126665	0.358973	-0.273154	-0.663008	-0.12711	0.873621	0.439491		-0.302862	0.920094	0.725628		-0.0509469	0.0291036	-0.781387	-0.202917	-0.260226	0.792597	0.376792	0.136763	0.239355		0.253775	0.579709	0.995513	0.579709
YBR209W		27.1435	12.629	20.2942	-0.765881	-1.18155	-0.169842	-0.16019	0.0947098	-0.643569	-1.34533	-1.6563	-0.467998	-0.433426	-0.11734	-1.18812		0.0582075	0.418073	-0.452558	-0.723076	-0.656053	-1.27709		-1.2516	-1.18505	-1.60575														-0.535413	-0.735565	0.528527	0.528995
YBR210W	ERV15	117.387	76.5274	39.6618	1.03112	0.268259	-0.122699	-0.327289	-0.184534	0.341913	1.17438	0.246627	-0.410128	-0.720951	-0.576237	0.311628	-0.980639	0.0477161	0.16959	0.264638	-0.46718	0.0255481	0.948022		-0.913453	-0.186183	0.970548		-0.451681	-0.457083		-1.42061	-0.236569	-0.094632		-1.04349	2.15502	1.22727	0.570511	0.259688	-0.745827	0.0469905	0.446274	0.211731			-0.52352	-1.31634	-0.52352
YBR211C	AME1	144.036	80.1068	52.9274	-0.0131737	-0.0105405	0.0718757	-0.403344	0.529924	0.11686	-0.289899	-0.119307	-0.171281	-0.851817	0.597873	-0.0308674	-0.94712	-0.374578	-0.529563	-0.179278	-0.281351	-0.132502	-0.00138584	-0.505297	-0.667894	-0.4178	-0.128707	-0.93398	0.222936	0.445193	-0.905117	-0.853976	0.352206	0.730846	-0.627694	-0.540328	0.657222	0.827813	0.77584	0.0953031	1.12744	0.148411	0.386543	0.285299	0.498988	0.428683	-0.627429	0.351596	-0.627429
YBR212W	NGR1	150.314	81.3062	50.3879	-0.163904	0.445778	-0.476462	0.0923517	0.609942	-0.143617	-0.501249	0.479627	-0.844385	0.00111698	0.729371	-0.427274	-0.224689	-0.494737	-0.117884	-0.842106	-0.13204	-0.278355	-0.0894952	0.172261	-0.47059	-0.631543	-0.230722	-0.068894	-0.1765	-0.382058			0.00359648	-0.0259925			-0.27656	0.704316	-0.619696	0.225806	0.847255	0.414832	0.33855	0.353188		0.241155	1.03453	1.46695	1.03453
YBR213W	MET8	181.116	115.445	60.7806	0.428772	-0.100073	0.00488008	-0.710793	0.207271	0.76332	0.329786	-0.236822	-0.25352	-1.38084	0.0676392	0.952946	-1.26281	0.435029	0.716577	0.253565	-0.570363	-0.767728		-1.00057	-1.0498	-1.3487		-1.56633	-0.368029	-0.255889			-0.163561	0.0894372			1.59259	1.02599	1.00929	-0.11803	-0.648937	0.699381	0.47944	0.580976		0.56576	-0.309907	-1.65823	-0.309907
YBR214W	SDS24	265.263	162.791	107.177	0.772418	0.0685393	0.999972	-0.121339	1.30527	1.30387	0.811638	-0.0155123	0.967991	-0.366577	1.87204	1.77558	-0.120882	0.473038	0.841528	0.122939	0.348344	-0.295254	0.770775	0.318373	0.164204	-0.656309	0.765326	0.117657	1.0381	0.411005	-0.0480493	-0.560046	1.06365	0.699567	0.181776	-0.279322	0.93252	0.105369	1.08887	-0.245696	1.03051	1.65264	0.184139	0.361055	0.58355	0.200716	0.563763	-0.0583592	0.563763
YBR215W	HPC2	79.9779	52.9913	34.4344	0.0409467	-0.661232	0.0218434	-0.00964691	0.103621	-0.172816	-0.214013	-0.973362	-0.232697	-0.17439	-0.102695	-0.47171	-0.194056	-1.43652	-1.64854	-1.24639	-0.0206651	0.0859026	-0.575112	0.430809	-0.323415	-0.0977359	-0.792985	0.261212	-0.2988	-0.0283077	-0.461094	-0.412463	-0.103142	0.297647	-0.20833	-0.148271	-0.0199564	-0.779306	-0.038641	0.0196659	1.54585	0.774682	0.30275	0.183638	-0.584655	0.169597	0.813323	1.58449	0.813323
YBR216C	YBP1	284.178	158.588	195.916	-0.0353954	-0.105518	0.0220167	-0.264329	0.411786	0.715307	-0.321058	-0.243968	-0.232484	-0.612616	0.40373	0.879876	-0.667787	-0.762696	0.373776	-0.359284	-0.405527	-0.206015	0.103691	-0.237371	-0.831984	-0.525532	-0.00704488	-0.591901	-0.107451	-0.39483	-1.20989	-1.01635	0.0638589	-0.0376775	-0.915537	-0.684511	0.34673	0.423819	0.435303	0.0551709	0.0299543	1.23916	0.426457	0.319517	0.908492	0.354529	0.803858	-0.405349	0.803858
YBR217W	ATG12	109.664	69.9537	43.4315	-0.305252	-0.595816	-0.868033	-0.0526242	0.145369	-0.261473	-0.699443	-0.887501	-1.32505	-0.24834	-0.0340894	-0.606633	-0.674237	0.336463	0.520293	0.389696	-0.550202	-0.165926	-0.83726	0.35801	-1.02316	-0.466783	-1.09651	0.168264	0.204326	0.0818275	-0.429492	-0.76179	0.335964	0.398408	-0.178483	-0.458468	-0.0252065	-0.213264	-0.650817	0.425897	-0.554382	-0.996328	0.47296	0.300857	-0.918025	0.189746	-0.345512	0.0964345	-0.345512
YBR218C	PYC2	168.86	74.5484	66.8659	-0.63672	-0.819649	-0.2051				-1.16422	-1.18129	-0.511279
YBR219C		153.115	96.7386	64.3648	-0.124931	0.323158	-0.536916	-0.252218	0.0187299	-0.076305	-0.446603	0.318683	-0.918595	-0.591778	-0.242202	-0.324835	-0.619929	0.317634	0.231548	0.0356322	0.0190111	-0.114156	-0.321551	-0.165436	-0.270986	-0.390915	-0.499404	-0.500055	-0.51509	0.0270003	-0.792746	-0.375838	-0.291909	0.348248	-0.521563	-0.115748	0.173326	0.938611	-0.298666	0.0281503	-0.47375	-0.360468	0.289997	0.276759	0.0221592	0.33462	-0.0618016	-0.175084	-0.0618016
YBR220C		113.177	75.4117	43.6633	0.32781	-1.08462	-0.715787	0.103188	-0.135125	-0.0772416	0.18822	-1.52907	-1.13817	0.0197627	-0.495041	-0.326261	0.172781	-0.1832	-0.312323	-0.311142	0.199626	-0.387689	-0.182676	-0.211696	-0.0323152	-0.791769	-0.338611	-0.559118	0.141157	0.278059	-0.481148	-0.261346	0.280833	0.577938	-0.22727	-0.0140809	0.0154396	-1.70185	-1.31095	-0.153018	-0.182717	-0.0151183	0.231942	0.40408	-0.11134	0.347423	1.29583	1.12823	1.29583
YBR221C	PDB1	118.389	65.9564	43.8178	0.644781	-0.255312	0.55631	0.43254	0.955992	0.983855	0.632669	-0.440579	0.423381	0.586473	1.29806	1.28857		0.200772	0.695254	0.140714	0.35807		0.440119	0.332664	0.177056		0.382482	0.135903		-0.185585	-0.231054	-1.17116		0.153757	0.00893473	-0.821979					0.602801	1.14785	0.181013		0.373547	0.196761
YBR221W-A
YBR222C	PCS60	232.262	212.053	202.308			1.12364			0.478027			1.1198			0.518774					0.404921	-0.325508	0.0808325	0.167704	0.238967	-0.700645	-0.0335116	-0.0747121															0.165954	0.375137		0.242417
YBR223C	TDP1	142.467	73.0925	57.4329	-0.166211	-0.930865	-0.644406	-0.547893	-0.0870291	0.132221	-0.504485	-1.32726	-1.05054	-1.10054	-0.416002	-0.00749088	-0.647511	-0.247721	-0.580721	-0.413399	-0.624838	-0.793483	-0.793147	-0.79969	-1.12179	-1.38645	-1.04543	-1.30985	0.137344	-0.177469	-1.44028	-1.02186	0.277505	0.161182	-1.13313	-0.689409	0.143026	-0.679753	-0.403032	-0.453029	0.164719	0.405908	0.49695	0.592964	0.0877014	0.510162	0.808939	0.567751	0.808939
YBR223W-A
YBR224W		52.2964	34.7947	18.8505	-0.423207	-1.60916	-1.27505	-0.0737192	-0.578559	0.37287	-0.864838	-2.21755	-1.82468	-0.284638	-1.22376	0.358739	-0.984127	0.060717	-0.451156	-0.239611	-0.468927	-0.882433	-0.729767	-1.18915	-0.915762	-1.5168	-0.97205	-1.8071	0.304507	-0.288358		-1.14635	0.423397	0.0597318		-0.799951	0.119289	-1.23342	-0.840558	0.699489	-0.772607	0.598351	0.446835	0.634368		0.617952	1.43891	0.067951	1.43891
YBR225W		147.691	97.9994	61.7818	-0.0547711	0.100133	-0.420976	-0.277206	-0.0586121	0.145231	-0.348226	0.025956	-0.776274	-0.634774	-0.369303	0.0123087	-0.461129	-1.2642	-1.21768	-1.17861	-0.563545	-0.36291	-0.360621	-0.588278	-1.04079	-0.755457	-0.544641	-1.03993	0.189097	-0.0946689	-1.16245	-0.958394	0.322673	0.236935	-0.870733	-0.63305	0.112904	0.487085	-0.315144	-0.173645	0.848375	1.19092	0.477248	0.392546	0.326092	0.45165	1.50606	1.16352	1.50606
YBR226C
YBR227C	MCX1
YBR228W	SLX1	73.9164	45.6985	44.4092	-0.0634237	0.24681	0.325574	-0.437813	-0.250049	-0.107648	-0.360358	0.218474	0.140143	-0.911127	-0.683902	-0.372535		-0.338441	-0.422343	-0.438	0.428962	-0.293486	-0.568981	-1.00615	0.270735	-0.653718	-0.785887	-1.57346	0.876457	0.803004	-1.51467		0.922569	1.0582	-1.20339						-0.261559	0.0654654	0.158226	0.360232	0.417507	0.567305
YBR229C	ROT2	83.5733	52.6223	33.6253	0.290895	-0.282435	-0.495391	-0.129321	-0.0758644	0.102781	0.136459	-0.476178	-0.867621	-0.380311	-0.397655	-0.0522946	-1.62588	-1.23757	-1.36095	-1.39423	-0.397636	-0.40938	-0.453185	-0.499414	-0.821557	-0.823556	-0.651814	-0.926468	-1.33403	-1.35914	-1.75828	-1.70253	-1.00665	-0.919906	-1.43347	-1.29383	1.76234	1.1497	0.758258	1.24557	0.963292	1.34194	0.42392	0.414176	0.781659	0.427055	0.58368	0.205034	0.58368
YBR230C	OM14	541.546	321.178	133.88	1.07301	-0.730793	0.384291	-0.357923	1.19666	1.93076	1.23312	-1.06466	0.21222	-0.773663	1.69357	2.72961		1.19308	2.36722	2.13743	0.214444	-0.126042	0.0206603	-0.507344	-0.0127354	-0.408333	-0.103181	-0.936593	1.22583	0.276049		-0.324061	1.22748	0.576099		-0.0697711					-0.673655	0.592182	0.227179	0.282292		0.429249
YBR230W-A
YBR231C	SWC5	124.094	130.28	124.908	-0.06577	-0.0192628	0.224211	-0.137352	-0.823537	-0.431675	-0.363648	-0.130756	0.0157161	-0.39413	-1.62635	-0.865654		0.559383	-0.232302	0.28427	-0.104689	0.354432	0.0307656	0.415421	-0.434447	0.295785	-0.0914807	0.241565	2.15299	1.44135	0.497078		2.03667	1.64222	0.696629						-1.39405	-1.14992	0.329758	0.0586467	-0.78811	0.173856
YBR232C		15.8093	10.2779	7.33201	-0.253661	-0.284917	-0.853478	-0.790638	-0.58648	-0.338444	-0.627105	-0.479435	-1.30719	-1.51823	-1.23678	-0.723771	-1.76513	-0.714021	-0.544668	-1.01674	-0.279192	-0.459399	-0.165536	-0.315802	-0.66504	-0.896858	-0.318765	-0.692038	-1.6894	-1.57096		-1.76757	-1.3168	-1.1137		-1.35158	1.13802	1.28569	0.457943	0.246902	-0.692111	0.292967	0.385849	0.437459		0.376236	-0.164976	-1.15005	-0.164976
YBR233W	PBP2	35.2152	24.3288	21.6784	-0.659278	-0.135924	-0.53872	-0.412819	-0.554919	-0.497402	-1.19585	-0.283878	-0.92081	-0.86812	-1.18491	-0.965681	-0.811837	-1.15467	-0.990909	-1.20241	-0.513711	-0.431105	-0.321861	-0.454261	-0.974941	-0.855394	-0.499762	-0.868819	-0.901362	-0.738225	-1.75861	-1.31198	-0.62903	-0.351844	-1.43379	-0.947033	-0.384013	0.527959	-0.108973	-0.0562835	-0.194004	0.236732	0.46123	0.424289	0.934025	0.414558	0.345705	-0.0850316	0.345705
YBR233W-A	DAD3	148.198	111.346	33.7499	0.559609	-0.627216	-0.359211		0.905896	-0.479685	0.513243	-0.928715	-0.700455		1.21573	-0.938718		0.346917	0.791964	0.182333	0.742659		-0.39439		0.685264		-0.583739				-0.624009				-0.362198						0.423766	-1.12105	0.0573944		-0.221541
YBR234C	ARC40	263.765	183.584	122.649	0.00641826	0.91979	-0.103374	-0.0646205	0.842939	0.633671	-0.262428	1.10178	-0.386406	-0.268982	1.11227	0.75564	-0.0736623	0.695899	0.748901	0.217805	0.555175	0.141516	-0.073243	0.459783	0.437517	-0.0162365	-0.211905	0.298205	0.700437	0.738882	-0.30765	-0.169532	0.768947	0.999537	-0.063407	0.0674485	-0.188765	1.17545	-0.312744	-0.19532	0.363369	0.537835	0.117658	0.157752	-0.148498	0.161578	0.850579	0.676113	0.850579
YBR235W		235.005	143.895	135.213	-0.705042	0.305005	-0.324178	-0.332865	0.517806	0.157529	-1.26002	0.294856	-0.657451	-0.730546	0.577959	0.0310245	-0.338132	0.019709	0.503028	0.173786	0.212065	0.121552	-0.500862	0.975753	-0.0158787	-0.045492	-0.707016	0.95698	0.0820256	0.21617	-0.406446	-0.201141	0.229226	0.521316	-0.156717	0.0393797	-0.921887	0.632988	-0.319319	-0.392414	0.0749318	-0.142762	0.227944	0.167045	-0.5503	0.0187731	0.176557	0.39425	0.176557
YBR236C	ABD1	138.876	96.6537	63.997	-0.581711	0.341862	0.218298	0.122668	-0.585638	-0.123599	-1.08709	0.343233	0.00845759	0.0532812	-1.2354	-0.39681	-0.115665	-0.21788	-0.407957	-0.396665	0.0711384	0.171412	0.35075	-0.505313	-0.202103	0.0275756	0.279008	-0.934001	0.49194	0.469473	-0.324299	-0.216393	0.58698	0.753058	-0.0791321	0.0258366	-0.971422	0.458898	0.124122	0.168946	-0.827438	-0.000144655	0.273242	0.143836	0.35814	0.428687	-0.124267	-0.95156	-0.124267
YBR237W	PRP5	98.5409	67.1247	40.2077	-0.6544	-0.115609	-0.118186	-0.19311	-0.303843	-0.348501	-1.18901	-0.257213	-0.404588	-0.490071	-0.772305	-0.739076	-0.149972	-1.29859	-1.1801	-0.91022	-0.3286	-0.393629	-0.340728	0.0555512	-0.73033	-0.800473	-0.521608	-0.217906	0.0373755	-0.161907	-0.580213		0.190257	0.17542	-0.320833		-1.03904	-0.107241	-0.254616	-0.340099	0.407791	0.171144	0.40173	0.406845	-0.200775	0.273457	0.425759	0.662407	0.425759
YBR238C		117.306	69.7677	88.4424	0.669953	-0.274744	-0.218468	0.0356233	0.244729	-0.613323	0.667964	-0.466083	-0.527688	-0.0964945	0.129195	-1.14209	0.990374	-0.317194	-1.66385	-0.360072	0.280259	0.17571	0.163009	0.326795	0.0742357	0.0338739	0.0616347	0.12841	1.70148	1.9617	0.922884		1.64262	2.11827	1.09879		-0.322411	-1.45646	-1.51806	-1.08687	1.79305	-0.782022	0.206024	0.141836	-1.03715	0.198385	0.736041	3.31111	0.736041
YBR239C		100.702	64.294	52.7779	0.496641	0.408843	0.226617	-0.21783	0.10334	0.122787	0.424951	0.431147	0.0186695	-0.532606	-0.103158	-0.0218483	-0.0920074	-1.08061	-1.5027	-0.639594	0.153295	0.135846	-0.325187	-0.212446	-0.0935385	-0.0245461	-0.503613	-0.560076	0.548903	0.744472	-0.541429	-0.488508	0.636695	1.00465	-0.284204	-0.215798	0.516958	0.523155	0.110677	-0.440599	1.39954	0.617746	0.246834	0.160392	-0.21941	0.347631	0.507069	1.28886	0.507069
YBR240C	THI2	42.6309	21.5421	16.889	-0.309245	0.0540926		-0.769511	-0.874015	-0.650088	-0.705042	-0.0344741		-1.48187	-1.7093	-1.19805				-0.897947	-0.470034	-0.976579			-0.917226	-1.65477				-0.613264				-0.237519								-0.300098	0.447191	0.678189
YBR241C		70.5409	38.8159	27.0677	0.140931	-1.99723	-0.0749553	-0.422447	0.345021	0.384274	-0.0738171	-2.7269	-0.351521	-0.884687	0.294011	0.376095		-0.407564	0.106923	-0.536647	-0.88648	-1.2411	-1.20836	-1.12047	-1.46753	-2.04242	-1.52618	-1.71942	-1.47086	-1.1035			-1.12606	-0.686024							0.187088	0.912742	0.58105	0.801317		0.598945
YBR242W		93.4414	80.5063	61.7009	0.0392822	0.549239	0.193884	0.0493257	-0.215801	-0.433728	-0.216347	0.615422	-0.021511	-0.0729172	-0.62762	-0.868778	0.249084	0.271808	0.113369	0.389982	0.773075	0.387159	0.475755	0.260004	0.725457	0.343745	0.423742	0.0431328	1.33366	1.27431	0.493376	0.520943	1.32159	1.48939	0.693133	0.68058	-0.465431	0.366337	-0.270595	-0.322001	-0.740989	-1.25876	0.0476177	0.0434134	-0.269391	0.216871	-0.988165	-0.470394	-0.988165
YBR243C	ALG7	41.4968	26.3997	17.6039	0.260647	-0.668446	-0.974968	0.090346	-0.547172	-0.419856	0.0940464	-0.98283	-1.45632	-0.0023343	-1.17218	-0.847667	-1.56282	-0.715513	-1.01048	-1.23051	-0.404933	-0.248134	0.112121	0.370704	-0.831198	-0.587256	0.00271568	0.184472	-1.40964	-0.535366	-2.5641	-2.4354	-1.07263	-0.166252	-2.19454	-1.94461	1.65686	0.579987	0.106498	1.56048	-0.161704	0.382843	0.426266	0.339122	2.19726	0.186232	0.276346	-0.268202	0.276346
YBR244W	GPX2	196.48	144.23	66.4027	1.2921			0.214793	0.0930158	-0.230336	1.54032			0.211799	-0.120124	-0.559247		0.810403	0.728611	0.407165	-0.529703	-0.227277	0.779217	0.457289	-0.996074	-0.556691	0.7751	0.29502	1.4761	0.464122	1.4893	1.80116	1.44591	0.748163	1.63375	1.81739					-0.848735	-0.966412	0.466371	0.329414	-0.858647	0.162268
YBR245C	ISW1	171.502	112.741	72.2058	-0.229145	-0.682185	0.0201107	0.41938	0.264335	-0.415741	-0.592728	-1.00086	-0.234824	0.563828	0.161415	-0.841405	-0.346851	-1.04537	-0.879796	-1.07043	-0.395857	-0.0918967	-0.534291	0.283556	-0.819206	-0.358295	-0.745721	0.0732042	0.602509	0.380851	0.2286	0.0349744	0.68348	0.671981	0.443062	0.249047	-0.245877	-0.654012	0.112027	0.910679	1.04121	0.229023	0.423349	0.266398	-1.18878	0.210352	0.116996	0.929184	0.116996
YBR246W		82.3308	57.8494	43.3049	0.303917	0.912518	0.707109	0.268385	0.0609626	-0.348726	0.154717	1.09224	0.608492	0.304014	-0.172799	-0.739418	-1.25948	-0.783988	-0.825125	-0.760047	-0.391607	0.1073	0.108918	0.0895093	-0.813589	-0.0663783	-0.000993695	-0.174549	-0.936817	-0.224775	-0.720556	-1.41476	-0.659974	0.117903	-0.453383	-1.0383	1.4142	2.35172	1.86797	1.56349	0.652326	0.0206292	0.421982	0.173679	0.452389	0.264059	-1.84734	-1.21565	-1.84734
YBR247C	ENP1	127.71	114.112	62.5612	0.818333	0.281009	-0.647193	0.309724	-0.435945	-0.627044	0.876019	0.263362	-1.05396	0.375146	-0.989397	-1.16298	0.83703	-0.46207	-0.868631	-0.249329	0.359537	0.593776	0.58656	0.406194	0.178995	0.646536	0.552035	0.229784	0.191491	0.56785	0.663741	0.830662	0.324762	0.843063	0.854036	0.955606	0.0389885	-0.573669	-1.89099	-0.461884	-0.120765	-0.913648	0.180542	-0.0527601	-0.302001	0.17641	0.977346	1.77023	0.977346
YBR248C	HIS7	104.352	74.7055	30.5216	0.0794708	0.317677	0.949891	0.431209	0.25562	-0.0170267	-0.159995	0.311489	0.906515	0.584182	0.147094	-0.234623	0.782309	0.121863	-0.525607	-0.354694	0.36088	0.553084	0.630895	0.454086	0.18077	0.586904	0.603368	0.290931	0.47779	0.868781	0.520596	0.823427	0.57463	1.11838	0.718841	0.949181	-0.942304	-0.47082	0.124206	-0.198127	0.6727	0.120071	0.18011	-0.0338195	-0.115473	0.163155	-0.0041352	0.548494	-0.0041352
YBR249C	ARO4	123.047	75.5601	20.3559	0.465467	1.54542	1.40054	0.22035	0.200828	-0.0945092	0.381239	1.92294	1.45971	0.221361	0.0570498	-0.352539	0.576624	0.101837	-0.745493	0.499212	1.40895	0.919514	0.613219	0.907995	1.56572	1.12389	0.582902	0.870468	-0.481532	1.40106	0.910926	0.643617	-0.262622	1.60536	1.08749	0.789513	-0.195385	1.34631	0.883082	-0.355264	0.802543	-0.851751	-0.156772	-0.204381	-0.504592	0.0375267	-1.73483	-0.0805388	-1.73483
YBR250W		36.2637	24.3833	18.4999	-0.296691	0.0728576	-0.195924	0.103548	0.379642	-0.554112	-0.687439	-0.00984438	-0.500014	0.0203828	0.350906	-1.05198		-1.58395	-1.24837	-2.63464	-0.187517	-0.381897	-0.464533	-0.0328008	-0.543899	-0.783281	-0.664953	-0.330711	-2.41242	-2.41411	-2.02644	-2.10618	-1.94782	-1.88509	-1.68675	-1.65227					1.59928	1.58265	0.356382	0.401384	1.02179	0.29791
YBR251W	MRPS5	149.168	121.298	76.7652	0.0608463	-0.441389	-0.288051	0.2415	-0.199211	0.18642	-0.18611	-0.68481	-0.613104	0.257754	-0.600358	0.0749916	0.416559	0.248324	0.0517027	0.163028	0.530969	0.396675	-0.201175	0.44629	0.405531	0.357692	-0.360029	0.280978	1.34832	0.947557	-0.207302		1.33439	1.19045	0.0313676		-0.602668	-1.10137	-1.02966	-0.158805	-0.652061	-0.0880368	0.125438	0.0389838	-0.391397	0.165312	0.941626	0.377602	0.941626
YBR252W	DUT1	236.108	229.266	119.138	1.56323	-0.385513	0.764195	-0.0339707	-0.137837	0.276198	1.92049	-0.611471	0.678567	-0.216244	-0.499498	0.211621	1.12656	2.40559	1.47155	1.67244	0.763674	0.214914	0.448032	0.403569	0.713035	0.0913266	0.391644	0.226433	1.54907	1.70546	1.16407	1.42097	1.50959	1.88384	1.32658	1.47979	0.793932	-1.73803	-0.447993	-1.3428	-1.97104	-1.46082	0.0506394	0.123588	-0.934939	0.177136	-1.01283	-1.52305	-1.01283
YBR253W	SRB6	236.82	172.865	85.098	0.144647	-0.291361	1.00136	-0.212246	-0.0197816	0.656891	-0.0686071	-0.487893	0.969691	-0.522999	-0.30549	0.790977	0.657461	1.23621	0.91184	1.06455	0.762261	0.699319	0.933524	0.506258	0.711168	0.801206	0.953761	0.357542	1.8007	1.81475	0.236317	0.823789	1.72921	1.98383	0.45035	0.949503	-0.726068	-1.14535	0.31223	-1.18046	-1.21733	-0.273571	0.0510936	-0.101887	0.503411	0.148715	-0.585801	-1.52956	-0.585801
YBR254C	TRS20	144.322	99.6993	59.9934	0.587115	1.25375	0.424798	-0.0357811	0.125287	-0.166133	0.551811	1.54012	0.261944	-0.219359	-0.0670899	-0.46154	0.215959	0.898136	-0.110385	0.708015	0.287481	0.223335	0.487006	-0.231225	0.0837779	0.103667	0.436769	-0.584053	1.279	1.07401		0.250342	1.27389	1.30614		0.44029	0.335852	1.32416	0.0459854	-0.435317	0.0432954	-1.16955	0.203703	0.119668		0.352828	-1.21554	-0.00269006	-1.21554
YBR255C-A		238.624	161.189	112.292	0.888148	0.0584206	0.77105	0.117394	0.965863	1.24177	0.973912	-0.0287935	0.686982	0.0442064	1.31428	1.68107	0.241111	1.0099	1.31521	0.958326	0.60424	0.867232	0.541444	0.943036	0.502353	1.04728	0.499799	0.915208	1.42536	1.51269	0.742255	0.90252	1.40162	1.70748	0.92819	1.01941	0.732801	-0.269904	0.445871	-0.196905	-0.000928764	0.722749	0.101887	-0.180045	-0.428391	0.0278282	0.276878	-0.4468	0.276878
YBR255W		115.625	79.7619	73.8339	0.433428	-0.0917804	-0.480792	-0.0972596	-0.0929811	-0.330234	0.336315	-0.225937	-0.8497	-0.325144	-0.425784	-0.711277	-0.242476	-1.37797	-1.38857	-1.00113	-0.444652	-0.397093	-0.787902	-0.363578	-0.883684	-0.80555	-1.03936	-0.753037	0.672673	0.39064	-0.755702	-0.447694	0.744715	0.680936	-0.486577	-0.179556	0.578791	0.0165387	-0.607224	-0.0826676	0.962787	0.289853	0.439033	0.408457	-0.552783	0.389459	0.897078	1.57001	0.897078
YBR256C	RIB5	344.754	245.577	157.85	0.477919	-0.0448776	0.175656	0.324768	-0.0135066	1.07344	0.398699	-0.164376	-0.043886	0.401032	-0.295178	1.4249	0.150377	0.757973	1.1275	0.829273	0.960995	0.472144	0.273938	0.139495	0.973781	0.468288	0.190072	-0.110729	1.46096	1.13803	-0.259126	0.34467	1.43269	1.36471	-0.0175787	0.524052	0.248322	-0.314753	-0.194263	0.250655	-1.42268	0.595626	-0.0127856	0.00385557	0.207651	0.250224	0.789889	-1.22842	0.789889
YBR257W	POP4	69.9283	47.1407	24.6562	-0.0126905	-0.473138	0.292647	-0.0143833	-0.327333	-0.339993	-0.289221	-0.726481	0.0997247	-0.18254	-0.810908	-0.726128	-0.650798	-0.705093	-1.04205	-0.0826675	-0.276459	-0.512852	0.455408		-0.661429	-0.975191	0.400183		-0.0124909	-0.0726148	-0.527973	-0.566226	0.146736	0.257112	-0.271495	-0.28481	0.361577	-0.0756832	0.750523	0.468258	0.231143	-0.643461	0.38497	0.462339	0.671678		-1.39398	-0.51938	-1.39398
YBR258C	SHG1	77.1205	47.2539	29.4321	0.753547	-0.175143	-0.000877574	0.0625917	0.198395	0.125298	0.785178	-0.335354	-0.260588	-0.0500906	0.0530513	-0.0180262	0.112702	-0.194263	0.121539	0.311955	0.641975	0.379923	0.508206	-0.617763	0.552218	0.333142	0.461315	-1.07757	1.18552	1.05597	-0.212175	0.339449	1.1923	1.28963	0.0267654	0.519416	0.672476	-0.448056	-0.37329	-0.162793	-0.0684874	-0.329981	0.0897571	0.0467813	0.434549	0.45981	0.0433087	0.304803	0.0433087
YBR259W
YBR260C	RGD1	118.35	83.1822	57.336	0.0632509	-0.267633	-0.380058	-0.266546	0.138833	-0.265445	-0.182738	-0.45675	-0.726046	-0.616431	-0.0448289	-0.612677	-0.49103	-0.542308	-0.644876	-0.809988	-0.311523	-0.291224	-0.242452	-0.147959	-0.707764	-0.650403	-0.407821	-0.477741	0.159835	0.131395	-0.761511	-0.712674	0.297134	0.443757	-0.492063	-0.414854	0.308292	0.0342802	-0.235016	-0.125401	0.600047	0.197311	0.396241	0.359179	0.0842416	0.329782	0.432327	0.835064	0.432327
YBR261C		165.562	123.638	82.3097	0.772899	0.0393263	-0.338031	0.112812	-0.00725856	0.217463	0.812313	-0.0538555	-0.674457	0.0363221	-0.284911	0.122235	0.548243	1.03561	0.502648	0.750903	0.399837	0.174842	-0.22427	0.385724	0.232249	0.0326023	-0.386769	0.203649	1.08241	1.25215	0.107279	0.740141	1.10232	1.46911	0.328478	0.875225	0.26407	-0.602099	-1.2227	-0.511921	-0.787558	-0.628668	0.167588	0.14224	-0.715248	0.182075	0.594032	0.435141	0.594032
YBR262C		183.584	118.822	79.0957	0.469351	-0.306459	-0.501327	0.252059	-0.494607	0.464052	0.386685	-0.50771	-0.874907	0.275922	-1.0858	0.497506	1.91622	2.30059	1.88229	1.56345	0.691531	0.71082	0.337947	0.838571	0.617703	0.81806	0.264184	0.78183	2.665	2.41011	0.847738	1.94979	2.48353	2.52852	1.02781	1.94938	-1.52953	-2.42393	-2.79113	-1.6403	-2.96809	-1.06594	0.0738284	-0.10724	-0.763631	0.056741	1.72518	-0.176966	1.72518
YBR263W	SHM1	165.161	119.042	69.4715	0.111818	0.832572	0.603101	0.133121	0.165292	-0.188182	-0.114638	0.987306	0.480818	0.0712685	-0.00134846	-0.495094	0.441814	0.203657	-0.129543	-0.0441621	0.0133029	0.343588	-0.0389303	0.176149	-0.278529	0.279894	-0.172177	-0.0639302	0.892417	0.84642	0.10552	0.425481	0.936498	1.09792	0.326817	0.595811	-0.556452	0.545492	0.0390042	-0.370546	0.128194	-0.450932	0.291832	0.0636942	-0.498994	0.240079	-0.489936	0.08919	-0.489936
YBR264C	YPT10	236.587	155.05	92.5195	0.401459	0.326597	-0.183379	-0.279978	0.118599	-0.141603	0.291489	0.323197	-0.484615	-0.639543	-0.0780815	-0.424208	0.178014	0.990225	0.854934	0.793882	0.132701	-0.101924	-0.00507798	0.659096	-0.120752	-0.37299	-0.132981	0.552682	1.28191	1.40743	-0.418032	0.396792	1.27643	1.61118	-0.167659	0.570335	0.113475	0.145183	-0.662629	-0.817557	-0.933015	-1.21809	0.253454	0.271066	0.0346775	0.106414	-0.555461	-0.270386	-0.555461
YBR265W	TSC10	201.307	157.006	111.418	0.784951	-0.197611	-0.141253	0.283235	-0.415033	-0.299559	0.829211	-0.364843	-0.432904	0.329567	-0.95503	-0.664594	0.949152	0.992006	0.201386	0.364623	0.728999	0.740548	0.351216	0.74623	0.667214	0.861626	0.279546	0.663932	1.71123	1.48768	-0.100726		1.65112	1.6846	0.132025		-0.119941	-1.31399	-1.38206	-0.619585	-1.15642	-1.02922	0.061785	-0.121078	0.147521	0.0822982	0.352838	0.22564	0.352838
YBR266C	SLM6	44.1658	41.1981	27.0492	1.23342	-0.361268	0.486472	0.364898	-0.786223	-0.882408	1.45804	-0.579649	0.337651	0.470083	-1.56503	-1.5516	0.804615	0.783017	-0.79311	0.477092	0.680403	0.97112	0.831099	0.316997	0.602998	1.19952	0.835171	0.1159	0.363904	0.821072	0.195125	1.02229	0.475236	1.07473	0.411446	1.12576	0.653424	-1.38426	-0.466963	-0.334532	-0.771918	-2.02869	0.0774052	-0.228402	0.423725	0.201097	-1.56173	-0.304954	-1.56173
YBR267W	REI1	174.52	196.506	122.488	1.25626	0.311817	1.09763	0.016678	-0.725696	-0.437032	1.49007	0.303798	1.08787	-0.129093	-1.46556	-0.873807	1.95578	0.725531	-0.649524	0.244687	0.60194	1.03544	0.765974	0.923583	0.499314	1.29379	0.759768	0.890371	1.55737	1.56539	1.06193	2.04356	1.51684	1.7557	1.23011	2.03264	-0.465711	-1.65198	-0.86791	-2.08487	-0.816037	-1.11849	0.102626	-0.258343	-0.470345	0.0332123	-0.250584	0.0518727	-0.250584
YBR268W	MRPL37	184.904	115.24	51.868	0.528648	0.797692	0.875023	-0.601456	-0.562488	0.303676	0.46983	0.941525	0.814612	-1.19271	-1.19735	0.253437	0.78039	1.77837	0.905772	1.31717	0.470244	0.332958	0.483797	0.107615	0.325287	0.264315	0.433054	-0.151433	1.63205	1.75281	0.319814	1.10951	1.58202	1.92716	0.529209	1.20322	-0.31056	0.161135	0.0342217	-1.9731	-2.10312	-1.06373	0.144957	0.0686423	-0.0961558	0.259047	-1.09795	-2.13735	-1.09795
YBR269C		253.093	151.697	100.893	-0.278847	-0.0471946	-0.226936	-0.182237	0.313364	0.835041	-0.662419	-0.167417	-0.538083	-0.471363	0.241987	1.06209	0.46323	2.03327	2.1277	1.52864	0.102611	0.0923998	0.442944	0.0946228	-0.160515	-0.0882144	0.385753	-0.16802	1.60751	1.35423		0.428603	1.5606	1.5625		0.598584	-1.12565	-0.630647	-1.00131	-0.934593	-1.88571	-0.466544	0.263125	0.180614		0.262643	0.534769	-0.8844	0.534769
YBR270C		82.7398	46.9739	32.3126	-0.212439	-0.150886	0.199942	-0.228882	-0.312527	-0.15811	-0.569304	-0.303515	-0.014074	-0.551624	-0.786576	-0.44933	-1.25171	-0.979875	-1.29393	-1.17643	-0.794229	-0.526533	-0.737433	-0.210709	-1.34563	-0.995241	-0.980926	-0.557859	-1.48177	-1.24206	-1.48024	-1.6214	-1.13558	-0.812791	-1.17088	-1.22179	0.682408	0.948196	1.23764	0.700087	0.507358	0.727101	0.551398	0.468708	0.18995	0.34715	-0.510537	-0.73028	-0.510537
YBR271W		32.6681	18.3244	12.3986	0.272573	-0.644085	-0.653334	-0.00960245	-0.562075	-0.92788	0.110768	-0.950856	-1.0615	-0.174314	-1.19667	-1.6208	-0.649584	-1.0076	-1.3209	-0.84509	-0.201297	-0.146262	-0.0678191	-0.271094	-0.562108	-0.437966	-0.205625	-0.634957	-0.903121	-0.596426	-1.20973	-0.697238	-0.630565	-0.222115	-0.915394	-0.401147	0.760353	-0.301272	-0.411918	0.475271	0.124229	-0.775711	0.360811	0.291704	0.709769	0.363863	-0.363793	0.536147	-0.363793
YBR272C	HSM3	76.4045	48.6148	26.607	-0.0185662	-0.632261	-1.70896	-0.0918718	0.0494925	-0.275866	-0.29746	-0.935337	-2.35732	-0.315873	-0.191648	-0.628537		-0.91625	-0.867187	-1.01155	-0.117668	-0.387301	-0.691649		-0.451597	-0.791201	-0.927915		-0.137392	-0.0471163	-1.27419	-0.994019	0.0377278	0.28044	-0.976274	-0.664684					0.675539	0.38301	0.33393	0.4039	0.0483594
YBR273C	UBX7	92.9895	61.2073	35.9685	-0.0452843	-1.14353	-0.344553	0.153624	-0.290234	-0.316681	-0.334924	-1.60639	-0.682462	0.106547	-0.749941	-0.69065	-0.0735745	-0.0504813	0.223624	-0.705818	-0.223385	-0.526003	-0.181572	-0.164901	-0.591295	-0.994464	-0.337332	-0.499373	0.369821	0.443518	-0.656892	-0.543472	0.480401	0.729313	-0.393254	-0.264605	-0.261349	-1.53281	-0.608887	0.180121	-0.973565	0.0151685	0.36791	0.468461	0.0559221	0.334472	0.624056	-0.364677	0.624056
YBR274W	CHK1	113.186	69.2857	45.8326	-0.334444	-0.726508	-0.0959228	-0.1658	-0.398041	-0.52905	-0.740376	-1.05904	-0.377259	-0.44308	-0.927107	-1.01384	-1.39099	-0.176204		-1.45801	-0.704085	-0.697108	-0.508883		-1.22651	-1.24521	-0.716303		-0.81799	-0.649382			-0.556267	-0.270564			0.650619	0.331956	1.01373	0.947914		0.44417	0.522422	0.548105			-0.569565		-0.569565
YBR275C	RIF1	51.2648	39.3915	30.0683	-0.410202	-0.38729	-0.438608	-0.16983	0.136675	-0.278776	-0.846602	-0.613804	-0.797918	-0.450014	-0.0483763	-0.632966	-0.21031	-2.04308	-1.4545	-1.58706	-0.427232	-0.146962	-0.425568	0.0803287	-0.860665	-0.438992	-0.619839	-0.186271	0.607161	0.288509	-0.606416	-0.0815989	0.68754	0.587498	-0.345581	0.145532	-0.636291	-0.403494	-0.587608	-0.239704	1.40612	0.954095	0.433433	0.29203	-0.274257	0.266599	1.5417	1.99373	1.5417
YBR276C	PPS1				0.681324	1.61011	1.66849				0.683909	2.00785	1.78862						-0.0661001	-0.935093			1.62345				1.75257
YBR277C		37.3138	28.1628	22.3601	0.60826	-1.30502	-0.438939	-0.0695019	-0.17778	-0.0743268	0.581459	-1.81835	-0.798325	-0.277382	-0.565139	-0.321825		0.656722	0.49501	0.847385	-0.335409	-0.0499019	-0.334556	-0.21507	-0.739328	-0.296753	-0.514462	-0.563427	-0.959869	-0.997327	-1.07632	-1.29869	-0.680093	-0.588893	-0.789393	-0.935228					-1.06015	-1.16921	0.403919	0.246851	0.274932	0.348357
YBR278W	DPB3	89.2899	65.5476	35.9373	-1.22365	0.174449	-0.143291	-0.0944983	-0.582608	-0.1925	-1.98719	0.123498	-0.435406	-0.320392	-1.23042	-0.501666	0.028696	0.463072	-0.998331	-0.16578	0.108536	-0.256896	-0.630811	-1.04832	-0.152686	-0.600097	-0.857475	-1.62729	0.235859	0.282841		0.228222	0.363484	0.582313		0.420648	-2.01589	0.0948021	-0.464102	-0.349088	-0.232085	-0.335886	0.261221	0.3432		0.578974	0.128216	0.232016	0.128216
YBR279W	PAF1	138.206	93.4793	62.2823	0.736495	-0.155467	0.666464	0.939517	0.928128	0.505758	0.761268	-0.309528	0.558599	1.45882	1.25227	0.560975	0.524936	0.0286159	0.0960973	0.0607208	0.611049	0.462818	0.833321	1.20239	0.511351	0.454621	0.837743	1.24634	0.808509	0.929927	0.477998	0.517032	0.863267	1.17432	0.678609	0.677107	0.236332	-0.834464	0.0336625	0.933882	1.15617	0.500254	0.099698	0.00819653	0.159135	-0.0439533	0.466592	1.12251	0.466592
YBR280C	SAF1	170.449	105.186	87.7866	-0.480134	-0.182766	-0.706731	-0.373013	0.135845	0.10047	-0.944659	-0.345359	-1.12705	-0.799627	-0.0497396	-0.0558103		-0.314122	0.0971477	-0.761144	-0.963023	-0.933763	0.0659552	-0.0216259	-1.56868	-1.59202	-0.050737	-0.316443	0.229147	0.0272211			0.357626	0.34845							-0.146887	0.705333	0.605653	0.65826		0.294817
YBR281C		70.3322	52.9249	33.8337	0.595877	-0.733422	-0.556503	-0.322341	-0.290501	-0.64912	0.564097	-1.06811	-0.942639	-0.712438	-0.75038	-1.19657	-0.566857	-1.02541	-1.51066	-1.34044	-0.554776	-0.517268	-0.516474	-0.726596	-1.02921	-0.981664	-0.725092	-1.21653	0.236662	-0.309361	-1.41571	-0.728854	0.364185	0.0405165	-1.10993	-0.429222	1.13095	-0.501257	-0.375781	-0.14558	0.76028	0.143871	0.47443	0.464395	0.38484	0.489932	0.519653	1.13606	0.519653
YBR282W	MRPL27	126.766	75.9923	43.9996	-0.0289652	-0.19348	-0.0860327	-0.369798	0.0959003	0.403388	-0.312041	-0.359422	-0.365119	-0.794096	-0.115383	0.405184	-0.365457	0.0896829	-0.604978	0.364821	0.25301	0.150912	-0.0306195	-0.00191559	0.0382278	-0.00246617	-0.162554	-0.291278	0.373552	0.426585	-0.634305	-0.735658	0.483656	0.713821	-0.371921	-0.435264	0.0534161	0.00603582	0.000338501	-0.428638	0.489595	0.0403636	0.214782	0.153378	0.209367	0.289362	0.0400251	0.489256	0.0400251
YBR283C	SSH1	233.759	160.107	112.424	0.77163	0.627197	0.492319	0.536688	0.526064	0.623547	0.810533	0.717745	0.344829	0.765679	0.59153	0.740233	0.361519	0.122405	-0.325883	-0.108379	0.658976	0.80045	1.05919	1.25614	0.574683	0.949411	1.09926	1.31498	0.810354	0.553804	-0.0235597	-0.130278	0.864878	0.830212	0.204906	0.102305	0.449013	0.356226	-0.0166907	0.404159	0.917413	0.848612	0.0842926	-0.14896	0.894353	-0.0588306	0.865303	0.934104	0.865303
YBR284W		127.714	99.3169	87.5492	-2.58195	-0.628668	-1.04991	-0.418467	-0.737882	0.558616	-3.89177	-0.930621	-1.54831	-0.877839	-1.48559	0.641416	-2.28708	-1.67554	-1.41024	-1.65526	-1.24408	-1.05217	-0.862301		-1.94007	-1.76555	-1.1255		-1.38984	-1.8453			-1.05536	-1.36468			-1.60468	1.35646	0.738771	1.40924	-0.0753526	2.29668	0.695993	0.713375			1.5579	-0.814123	1.5579
YBR285W		108.687	71.749	47.2745				-1.32441	0.0961879	0.852969				-2.43668	-0.114911	1.08938		-0.674436	1.50932	0.447127	-0.866908	-0.792455	-0.178565		-1.44167	-1.38494	-0.33385		-0.55849	-0.617257	-0.3172		-0.329787	-0.241172	-0.0724272						-1.62424	0.64225	0.574759	0.592486	-0.261423
YBR286W	APE3	673.636	377.687	255.709	0.937155	0.852712	0.705843		1.48114	1.70857	1.04263	1.01374	0.606938		2.16107	2.39147	1.69756	0.965521	0.962242	0.439278	0.929173	0.918468		0.870372	0.93173	1.12236		0.822433	1.55054	1.70642	0.713715		1.51088	1.88472	0.901235		-0.654931	-0.68382	-1.09062		1.19883	1.95219	-0.00255696	-0.203894		0.0479394	3.04282	2.28945	3.04282
YBR287W		526.069	294.375	192.963	-0.188358	1.32779	0.484697	0.315474	0.788557	1.1907	-0.535538	1.6373	0.335472	0.385039	1.0229	1.60335	0.937707	0.781919	0.737968	0.577542	0.729644	0.585826	0.32324	0.352069	0.668066	0.634885	0.247156	0.160679	2.84875	2.36234	0.174922	0.513326	2.64389	2.48481	0.392365	0.673816	-1.47324	0.699593	-0.602234	-0.552668	0.284932	1.02581	0.0615777	-0.0490597	-0.145209	0.19139	1.62804	0.887167	1.62804
YBR288C	APM3	128.135	73.5666	52.1747	-0.245565	-0.151226	-0.608391	0.108052	-0.0154178	-0.0210054	-0.615752	-0.303962	-1.00633	0.0281326	-0.298319	-0.240678	-0.420672	-0.757354	-0.728147	-0.524062	-0.0443688	-0.0437494	-0.149218	0.0377263	-0.354738	-0.287737	-0.299871	-0.240664	0.0462271	0.115277	-0.77474	-0.980909	0.197982	0.429011	-0.504558	-0.653042	-0.19508	0.11671	-0.585661	0.448805	0.429828	0.283384	0.310369	0.243987	0.204686	0.278391	0.869045	1.01549	0.869045
YBR289W	SNF5	98.5592	81.0945	56.9185	0.253039	0.157432	-0.0916858	0.394361	0.151232	-0.301904	0.0833786	0.101162	-0.372058	0.520778	-0.0244537	-0.668163	0.37856	-1.24968	-1.26791	-1.39973	-0.0523051	-0.389126	-0.107887	9.8244e-05	-0.365225	-0.793876	-0.252018	-0.288707	0.0245309	0.326552	-2.30538	-0.0905205	0.179047	0.622303	-1.95019	0.137609	-0.295181	-0.277398	-0.750618	0.142218	1.24346	0.731564	0.31292	0.404749	1.69818	0.288805	1.48218	1.99407	1.48218
YBR290W	BSD2	366.524	224.615	123.34	0.707333	1.37314	0.14892	0.236106	0.339416	0.375809	0.720377	1.69682	-0.0767064	0.248472	0.284801	0.363213	0.757647	0.443883	-0.0701979	0.288888	0.635395	0.630152	0.653071	0.466852	0.543523	0.699844	0.629044	0.30723	2.46679	1.82493	0.361943		2.31054	1.99314	0.568999		-0.03727	0.939177	-0.834353	-0.509175	0.354999	0.0743249	0.0918722	-0.0696921	0.0600448	0.159622	0.908678	1.18935	0.908678
YBR291C	CTP1	244.962	132.36	71.9538	-0.130503	0.298098	0.585799	-0.125961	-0.0753195	0.20601	-0.454415	0.285792	0.45958	-0.37453	-0.396759	0.104806	0.208872	0.0800832	0.220519	0.553102	0.298152	0.390936	0.429449	0.0325305	0.0978793	0.34928	0.370127	-0.247298	1.3491	1.3393	-0.556998		1.33507	1.54885	-0.298907		-0.663287	0.0769199	0.250708	-0.583401	-0.617278	-0.448297	0.200273	0.0416554	0.669035	0.279829	-0.699005	-0.867986	-0.699005
YBR292C		35.1027	11.1792	5.40501			1.67812						1.80044					-0.37677	-0.448963	-0.301839	0.518399	-0.470306			0.38892	-0.912841																	0.129479	0.442535
YBR293W	VBA2	86.7534	53.9984	37.5055	-0.848713	-0.200009	0.924616	0.056796	-0.305812	-0.0307095	-1.46147	-0.367991	0.875489	-0.0600632	-0.775542	-0.255446	-1.14704	-1.03693	-1.23169	-0.812005	-0.184908	0.119844	-0.165073	-0.163783	-0.54045	-0.0479963	-0.318229	-0.497946	-1.51846	-0.391816	-1.27038	-1.49257	-1.16761	-0.0349204	-0.972671	-1.10739	-0.314432	0.779047	2.02253	1.08698	0.456144	0.556559	0.355543	0.16784	0.654441	0.334162	-1.46597	-1.56638	-1.46597
YBR294W	SUL1	118.134	72.0171	56.0591	0.398513	0.588904	-0.0835713	-0.409253	-0.375003	-0.361847	0.287358	0.667484	-0.362097	-0.861984	-0.889247	-0.759386	-1.06804	-1.4112	-1.76299	-1.38725	-0.707321	-0.422211	-0.879766	-0.515714	-1.23078	-0.84236	-1.14572	-0.94728	-0.307881	-0.336197	-1.28083	-1.14028	-0.111067	0.0159649	-0.98254	-0.794558	1.3554	1.73552	0.705941	0.206054	0.873745	0.627869	0.523463	0.420149	-0.163183	0.431566	-0.0780719	0.167804	-0.0780719
YBR295W	PCA1	209.063	161.577	110.227	-0.773028	-0.328455	0.388468	-0.141343	-0.317915	-0.362235	-1.35535	-0.536581	0.217348	-0.400998	-0.79543	-0.759977	-0.826744	-0.398078	0.206725	-0.600493	0.0135783	-0.337594	-0.857755	-0.429979	-0.278165	-0.718356	-1.12024	-0.837816	0.328325	0.140049	-0.826543	-0.706401	0.444185	0.451674	-0.553484	-0.409284	-0.528603	0.290163	1.04409	0.425746	-1.00216	-0.159484	0.291743	0.380762	-0.566754	0.407837	-1.20358	-2.04625	-1.20358
YBR296C	PHO89	39.0938	34.43	19.0496	-0.34751	-0.103941	-0.600275		-0.0345217	-0.628479	-0.758697	-0.241899	-0.99637		-0.329714	-1.16516		-0.449536	0.93052	-2.02837	-0.681872	-0.709531		-0.819067	-1.19715	-1.26342		-1.33459	0.258487	-1.01358	-1.57822	-2.18282	0.383233	-0.603764	-1.26341	-1.72032					-1.26023	0.863207	0.515283	0.553887		0.515525
YBR296C-A
YBR297W	MAL33	182.173	118.576	57.21	0.377983	-0.381121	-0.600407	-0.122321	1.97429	1.41038	0.258571	-0.605706	-0.996533	-0.368266	2.97149	1.93767		-1.60849	0.531925	-0.0705996	-0.766711	-0.0504361	-1.06687	-0.54176	-1.30926	-0.297536	-1.36236	-0.980535	-2.14812	-0.925361			-1.71714	-0.523052							2.43956	2.00827	0.542552	0.2471		0.438775
YBR298C	MAL31	516.734	229.719	107.587	-0.35049	-0.394531	-0.771115	-0.259772	1.39166	1.16151	-0.762876	-0.623308	-1.20608	-0.604776	2.01402	1.55893	-1.02488	-1.02541	-0.181911	-0.00261548	-0.28378	-0.285441	-0.879543	-1.05479	-0.671103	-0.641928	-1.14547	-1.63556	-0.0926963	0.173921	-1.75028	-1.09659	0.0767363	0.482663	-1.42592	-0.755765	0.261999	0.401567	-0.181207	0.420099	2.19593	1.56154	0.387323	0.356487	0.280457	0.580767	1.74275	2.37714	1.74275
YBR298C-A
YBR299W	MAL32	136.834	75.0935	51.0953	0.0690513	-0.696832	-0.659446	-0.47994	0.598278	-0.308033	-0.174605	-1.02009	-1.069	-0.983614	0.710204	-0.67749	-2.17167	-2.26046	-0.0381891	-0.785247	-0.488553	-0.434262	-0.856029	-0.614055	-0.941697	-0.860021	-1.11824	-1.07284	-1.28132	-1.14153	-2.12187	-2.20165	-0.960642	-0.720817	-1.77688	-1.73705	1.99707	1.15158	1.10267	1.18806	0.748393	0.107757	0.453144	0.425758	0.658635	0.458784	-0.994911	-0.354276	-0.994911
YBR300C		111.536	65.3028	36.5587	-0.209116	-0.319995	-0.029336	-0.310415	-0.249294	-0.16352	-0.564645	-0.525477	-0.295522	-0.691916	-0.682662	-0.457563	-0.19814	0.609926	0.575197	0.267536	0.0314786	-0.333328	-0.971814	0.00900219	-0.254511	-0.712105	-1.2523	-0.277338	-0.192396	-0.0584649	-1.95947	-0.698543	-0.0102768	0.270057	-1.62349	-0.402305	-0.366505	-0.327337	-0.0973819	-0.493776	-1.25786	-0.725098	0.28599	0.378777	0.371193	0.28634	-0.627717	-1.16048	-0.627717
YBR301W	DAN3	59.0877	36.0057	20.6725	-0.118869	-0.227899	-0.970081	-0.380271	-0.31904	-1.11552	-0.438102	-0.404598	-1.45032	-0.812116	-0.797279	-1.90636	-2.10301	-0.128442	0.256838	0.159219	-0.700548	-1.01771	-1.57308	-0.793223	-1.22183	-1.71505	-1.94846	-1.30159	-2.2155	-1.86033	-2.80934	-2.63784	-1.77595	-1.37844	-2.42617	-2.12437	1.66491	1.69841	0.652688	1.29089	-1.05412	-2.06558	0.521286	0.697336	0.477709	0.508372	-2.71827	-1.70681	-2.71827
YBR302C	COS2
YCL001W	RER1																						-0.0342412				-0.166748
YCL001W-A			38.9697	40.3993	-1.13032	-1.23872	-0.907097			-0.711951	-1.85633	-1.73133	-1.37301			-1.29219		-0.793917	0.557272	-0.646574	-0.653435	-0.379349	0.276402		-1.15958	-0.779547	0.192925															-0.645617	0.506142	0.400198
YCL001W-B
YCL002C		189.269	122.567	74.0084	-0.0500577	0.416581	0.698504	0.216213	0.428197	-0.146745	-0.341617	0.441304	0.597929	0.214242	0.430699	-0.432034	-0.956323	0.200221	0.403802	0.722735	-0.412194	0.152322	0.227332	-0.763656	-0.840794	-0.000400184	0.13611	-1.26384	-1.36761	-1.40683	-0.887465	-1.2774	-1.03595	-0.963543	-0.611022	-0.916324	0.614706	1.39763	1.55425	1.17056	0.0268974	-1.15477	0.4286	0.152722	0.747133	0.500189	-2.70902	-1.52735	-2.70902
YCL004W	PGS1	110.859	72.5044	47.7009	-0.0271188	-0.0547466	0.320496	-0.284905	-0.0442751	-0.201219	-0.309452	-0.177329	0.13391	-0.648021	-0.345742	-0.514936	-0.74306	-0.317995	-0.486296	-0.503007	-0.714469	-0.352435	-0.231607	0.430308	-1.24023	-0.740105	-0.395264	0.260572	-0.779935	-1.03637	-1.28581	-1.09444	-0.523055	-0.624609	-0.987245	-0.753858	0.433608	0.565731	0.87697	0.0950385	0.140554	-0.0119281	0.52576	0.38767	0.591981	0.169736	-0.888898	-0.736416	-0.888898
YCL005W	LDB16	92.1562	66.4081	40.0076	-0.517867	2.01727	-0.308426	-0.455881	-0.596736	-0.378195	-0.997567	2.54226	-0.638114	-0.942217	-1.25363	-0.784266	-0.46467	0.399983	-0.121926	0.294878	0.220403	-0.111811	0.230993	-0.142031	-0.00486111	-0.387478	0.140349	-0.470172	-0.742663	-1.07432	-1.08314	-0.476785	-0.490525	-0.659329	-0.795833	-0.205388	-0.532897	3.00693	-0.173444	-0.477547	-1.13171	-1.07914	0.225264	0.275668	0.936182	0.328142	-0.9057	-0.958264	-0.9057
YCL005W-A	VMA9																						1.55683				1.67545				-1.02781				-0.74357										2.41902
YCL007C		240.149	157.756	91.9273	0.266346	0.932983	1.86692	0.806261	0.79949	1.1088	0.102037	1.1191	2.0322	1.22953	1.04087	1.47872	0.589368	1.54902	1.20361	1.35012	1.58794	1.87734	1.4691	1.35859	1.80224	2.52756	1.57387	1.44577	0.583559	0.915712	0.232911	0.424903	0.666941	1.16132	0.447133	0.595298	-0.487331	0.529731	1.44283	0.64016	-0.162738	0.1286	-0.214303	-0.650218	1.12673	-0.0871838	-1.31423	-1.60557	-1.31423
YCL008C	STP22	138.456	97.2549	70.7316	0.30228	-0.89616	-1.08639	-0.50479	-0.699895	-0.126629	0.152423	-1.28171	-1.5931	-1.02637	-1.42316	-0.401421	-0.171947	0.501248	0.115676	0.472664	0.0834185	0.136172	0.493576	-0.140071	-0.185876	-0.0240673	0.444376	-0.46767	-0.306916	-0.191028	-0.712305	-0.280298	-0.110225	0.148778	-0.44559	-0.03091	0.32437	-1.10977	-1.42115	-0.854426	-1.53884	-0.874085	0.269295	0.16024	0.889965	0.327599	0.547066	-0.117686	0.547066
YCL009C	ILV6	454.39	308.549	173.098	0.687882	0.50158	0.410003	-0.0788687	-0.0789476	0.37702	0.693104	0.552868	0.243784	-0.293499	-0.402721	0.365056		0.938193	1.131	1.0878	0.901167	0.735894	0.357239	0.0652227	0.894722	0.854806	0.286521	-0.205558	0.557076	0.475263	-0.11472		0.643828	0.758356	0.118808						-1.53372	-0.722742	0.00644494	-0.118912	0.167713	0.27078
YCL010C	SGF29	256.716	173.645	97.4057	0.469719	1.84292	1.49697	0.183365	-0.0853117	0.312976	0.387201	2.31342	1.57807	0.157722	-0.41318	0.267591	0.945597	0.852276	0.594984	0.890309	0.751789	0.596462	0.789912	0.788269	0.69733	0.650473	0.787483	0.717606	0.637789	0.57939	0.310192	0.95949	0.714271	0.85362	0.520123	1.07	-0.558395	1.36783	0.632475	-0.787875	-1.00816	-0.622718	0.0544595	-0.0540106	0.26736	0.0706631	-1.25519	-1.64064	-1.25519
YCL011C	GBP2	193.517	153.76	116.343	1.40274	0.680342	1.49575	0.414893	1.02044	0.741911	1.69546	0.787499	1.57658	0.556107	1.40397	0.920364	0.955696	0.445661	-0.195407	-0.0171776	1.3503	0.979921		1.05528	1.48823	1.21242		1.05852	0.200353	-0.220486		0.171037	0.332497	0.121827		0.369868	0.739767	-0.168197	0.620879	-0.399589	1.59937	0.937541	-0.137922	-0.232498		-0.00323707	0.316662	0.978495	0.316662
YCL012C																							-0.334597				-0.514509				-0.929284				-0.650519										0.13601
YCL014W	BUD3	187.963	109.133	63.9363	-0.417814	-0.644533	-0.501001	-0.00610202	0.578525	-0.451597	-0.857275	-0.951443	-0.874508	-0.168291	0.677742	-0.895972	-1.1607	-1.69919	-1.1663	-1.78334	-0.457786	-0.412695	-1.24358	-0.350817	-0.90104	-0.828415	-1.56696	-0.736744	-1.57415	-2.07292	-1.25286	-1.74551	-1.21621	-1.57293	-0.956127	-1.332	0.303424	0.209255	0.286191	0.992408	1.84404	0.887367	0.443254	0.41572	-0.610832	0.385927	0.601176	1.55785	0.601176
YCL016C	DCC1	83.0168	65.0253	47.128	-0.0820483	-0.105649	-0.310734	-0.57962	-0.544364	-0.859737	-0.386473	-0.24414	-0.640947	-1.15513	-1.16757	-1.5171	-0.433411	-0.000589148	-1.6896	-0.753695	-0.349079	-0.530798	-0.619618	-0.307721	-0.757391	-1.00149	-0.844516	-0.681721	-1.04969	-1.27376	-0.850014		-0.758488	-0.841794	-0.575651		0.0469376	0.18927	-0.207537	-0.721722	0.522038	-0.763403	0.408312	0.470692	-0.268865	0.374	-0.555866	0.729575	-0.555866
YCL017C	NFS1	128.724	91.5939	60.5914	0.24852	-0.377052	0.322555	0.114645	0.0651582	0.216276	0.0770422	-0.600366	0.136438	0.0394762	-0.165904	0.120428	-0.186674	0.0858695	-0.279796	0.00219352	0.0867905	-0.213436	-0.128545	-0.0337534	-0.18142	-0.536407	-0.275935	-0.331927	-0.250277	-0.853117	-0.686639	-0.439571	-0.0607929	-0.456957	-0.421349	-0.172343	0.263717	-0.413691	0.323113	0.226151	0.113892	0.118234	0.268211	0.322971	0.145414	0.298174	-0.204878	-0.20922	-0.204878
YCL018W	LEU2				-1.85536	-1.75368	-0.216561	-0.244275	-0.216531	-0.247831	-2.87296	-2.40724	-0.525348	-0.57811	-0.628821	-0.585872		0.547985	0.494165	0.194271	-0.0223351	-0.529297			-0.325622	-0.999291			1.36823	0.164442			1.35176	0.473991							-1.12299	-0.780143	0.303287	0.469994
YCL021W-A		91.387	60.3957	40.6655	-0.930726	-0.410826	-0.964331	-0.787016	-0.859501	-0.978967	-1.57647	-0.644695	-1.44326	-1.512	-1.68545	-1.69855	-0.677734	0.323294	0.586617	0.32296	-0.289715	-0.43701	-0.791513	-0.29694	-0.678947	-0.864048	-1.04354	-0.667956	-1.33035	-1.55136	-1.10224	-1.48273	-1.00343	-1.09577	-0.813865	-1.09865	-0.898734	0.0330384	-0.765529	-0.834261	-2.27207	-2.02151	0.389231	0.427038	-0.229676	0.371016	-1.25598	-1.50654	-1.25598
YCL022C		36.8158	19.0181	21.5414	-0.436739	0.0205929	0.0541437	-0.936498	-0.342972	-0.411499	-0.883812	-0.0784436	-0.193047	-1.76921	-0.836609	-0.834949	-1.00856	-0.232082	-0.127409	-0.955662	-1.18703	-0.639137	-0.546129		-1.86468	-1.16026	-0.759427		-1.49537	-2.34819	-2.25722	-1.45592	-1.14746	-1.82478	-1.90471	-1.07484	0.12475	0.930118	0.815514	-0.760644	-0.7092	0.120713	0.677655	0.521121	1.14528		-0.694801	-1.52471	-0.694801
YCL023C		36.9337	19.258	14.1211	-0.972026	-0.160084		-0.514912	-0.620894	-0.00266496	-1.63438	-0.315588		-1.04379	-1.29333	-0.212766		1.02628	0.840131	0.466453	-1.09626	-0.586107	-0.710997	-0.470991	-1.74473	-1.08254	-0.950316	-0.890179	-1.75502	-2.03108	-1.49625	-1.35038	-1.37407	-1.53466	-1.18599	-0.981128					-2.13346	-0.679219	0.648478	0.496437	0.235677	0.419188
YCL024W	KCC4	31.2037	27.2998	19.8956	-0.754088	-0.789859	-0.778651	-0.196995	-0.433107	-0.590223	-1.32879	-1.14219	-1.21533	-0.496756	-0.984732	-1.10694	-1.23505	-0.735921	-1.21999	-2.02837	-0.491842	-0.603351	-0.765047	-0.975483	-0.946043	-1.10781	-1.0129	-1.5343	-1.82472	-2.08662	-1.5299		-1.4349	-1.58547	-1.21778		-0.0937455	0.0928567	0.0197114	0.738289	0.235262	0.921427	0.454201	0.504464	0.204882	0.558816	0.901715	0.21555	0.901715
YCL025C	AGP1	487.863	230.024	124.384	0.0992983	0.0882799	-0.154469	-0.150106	0.513761	1.24504	-0.132193	0.0103978	-0.449127	-0.416075	0.571312	1.68605	-0.248366	0.0755992	0.733249	1.5826	0.773699	0.223721	-0.0522776	0.0118304	0.726282	0.104233	-0.187631	-0.273727	1.86451	0.963805	-1.21306	0.036916	1.78489	1.20532	-0.918538	0.250771	0.116173	0.258764	-0.200761	-0.167708	-0.161937	0.103457	0.0474171	0.119488	0.730907	0.285558	0.304218	0.038824	0.304218
YCL026C-A	FRM2	80.5611	55.5179	37.4896	0.294838	-0.311503	-0.73765	-0.927448	-1.57342	-1.21227	0.141988	-0.51433	-1.165	-1.75363	-2.85868	-2.05361		-0.0627715	0.0912202	-0.445449	-1.61171	-1.27512	-1.84288	-1.54586	-2.42587	-2.09227	-2.26085	-2.26254		-2.44116				-1.90983							-2.9499	-1.60816	0.814161	0.817151		0.716679
YCL026C-B		190.341	125.518	78.255	-0.203105	-0.737307	-0.26801	-0.491162	-0.585446	-0.491937	-0.556216	-1.07321	-0.588503	-1.00292	-1.23508	-0.957363	-1.4693				-0.62808	-0.337189	-0.552226	-0.101521	-1.12607	-0.717762	-0.766487	-0.418451	-1.23315	-1.5613	-1.53856	-1.70625	-0.918602	-1.10486	-1.22596	-1.29714	0.913087	0.396091	0.8808	0.46638			0.497992	0.380574	0.459473	0.31693
YCL027W	FUS1	46.5141	34.4692	25.3589	0.24356	-0.502254	-0.874109	0.911653	-0.255042	-0.788857	0.070086	-0.764698	-1.33251	1.41087	-0.692107	-1.40923		-1.20181	-1.01165	-2.2241	0.361718	0.21627	-0.343471	-0.379246	0.181877	0.0933138	-0.524783	-0.773042				-2.10114				-1.64779					0.319539	0.814871	0.179841	0.122956		0.393796
YCL028W	RNQ1	77.4408	50.7346	28.2153	-0.0707501	-0.103291	0.189612	0.00211362	-0.386906	-0.144457	-0.370631	-0.241046	-0.0267551	-0.154154	-0.908807	-0.428552	-0.202696	-0.119841	-0.165099	-0.189516	-0.173713	-0.16802	-0.409794	-0.285736	-0.525657	-0.469851	-0.601575	-0.653652	-1.36836	-1.18328	-1.40406	-1.07853	-1.0366	-0.759017	-1.09893	-0.73973	-0.167935	-0.0383493	0.175941	0.0485424	-0.743708	-0.239037	0.351944	0.301831	0.497353	0.367915	-0.414978	-0.919649	-0.414978
YCL029C	BIK1	134.881	92.3982	51.7983	1.18913	-0.624719	0.0838308	0.184799	-0.590645	-0.147872	1.39594	-0.925437	-0.156605	0.16019	-1.24362	-0.433749	0.26093	0.234722	-0.301023	-0.26136	-0.055747	-0.275744	0.132525	0.749	-0.369774	-0.627717	0.0263392	0.667468	-0.167379	-0.576996	-0.088741	0.102299	0.0115565	-0.204338	0.143344	0.30883	1.13501	-1.18637	-0.417535	-0.10074	-0.942601	-0.172388	0.314027	0.351973	-0.117005	0.0815316	0.245147	-0.525065	0.245147
YCL030C	HIS4	731.724	340.982	174.272	0.505114	0.697973	0.899099	0.127722	-0.207516	0.543913	0.436831	0.81064	0.844167	0.0619771	-0.614005	0.619041		0.597824	-0.358359	-0.02943	0.271994	0.0975826	0.945618	0.530242	0.0633139	-0.0806192	0.967764	0.388164	0.267709	-0.125019	0.0241939		0.391281	0.209168	0.250007						-0.255646	0.648471	0.20868	0.178202	0.717757	0.142077
YCL031C	RRP7	102.69	72.4389	40.2716	1.06475	0.879841	0.796182	0.724685	0.175577	0.836566	1.22153	1.04935	0.717832	1.08916	0.0155545	1.06441	0.861717	0.521386	-0.0656099	0.526991	1.23045	1.14788	0.918971	1.41869	1.32985	1.45856	0.936912	1.52251	0.389572	0.362887	0.867684		0.497638	0.655545	1.04665		0.359817	0.187632	-0.143885	0.227444	0.0811644	0.537423	-0.0993973	-0.310678	-0.109741	-0.103819	0.681308	0.22505	0.681308
YCL032W	STE50	65.378	40.5834	25.9975	0.941114	-0.696728	-0.759413	-0.28597	0.048596	-0.654214	1.04818	-1.01995	-1.19172	-0.649855	-0.193121	-1.20432		-0.400956	-0.655285	-0.63174	-0.7483	-0.594521	-0.983096	-0.713255	-1.28493	-1.09487	-1.26536	-1.19949	-0.367123	-1.40738	-0.495673	-0.821898	-0.162771	-0.964044	-0.240989	-0.511844					0.462164	-0.572584	0.536634	0.500354	-1.02437	0.486239
YCL033C		348.97	211.919	109.291	-0.338649	0.891702	-0.762062	-0.425859	0.0258095	0.306087	-0.746272	1.06492	-1.19497	-0.890559	-0.230568	0.257107	-0.00820583	1.37065	1.98052	1.59464	-0.643539	0.0108219	-0.163161	0.438385	-1.1465	-0.207764	-0.316015	0.270885	0.869294	0.457058	0.0368421	0.126482	0.916318	0.7417	0.261953	0.330304	-0.738066	1.07312	-1.18676	-0.882353	-2.21109	-1.33753	0.502961	0.218586	-0.577969	0.1675	-0.150766	-1.02432	-0.150766
YCL034W	LSB5	187.768	127.527	93.9445	0.114179	1.33865	0.0363365	-0.0892628	0.466963	0.765541	-0.111328	1.65155	-0.214906	-0.311384	0.494406	0.956326	0.21236	1.01192	0.796428	0.630175	0.0075675	-0.0677132	-0.121837	-0.170975	-0.286108	-0.322855	-0.268169	-0.507128	0.196208	-0.291739	-0.63714	-0.0550404	0.328879	0.0566386	-0.374599	0.169115	-0.323687	1.43919	-0.427266	-0.523743	-0.302022	0.32615	0.293675	0.255142	0.10643	0.336153	0.753416	0.125244	0.753416
YCL035C	GRX1	175.734	130.748	95.7475	-0.343624	-0.119994	0.0652287	0.0175551	0.0621989	1.22069	-0.753248	-0.262968	-0.17944	-0.127584	-0.170767	1.64898	0.963823	1.04681	1.72911	0.968301	0.295722	0.721795	0.511924	0.819149	0.0946682	0.834144	0.465619	0.757032	1.58803	0.70309	0.989018	1.15871	1.5436	0.966791	1.16125	1.24691	-1.71707	-1.22679	-1.14326	-1.09141	-1.89988	0.680684	0.201054	-0.112349	-0.69563	0.0621165	1.82395	-0.756617	1.82395
YCL036W	GFD2	111.893	202.85	149.611	-0.024718	0.497439	0.526499	0.14871	-0.120488	-0.385023	-0.306086	0.547432	0.386787	0.0980914	-0.470987	-0.794656		0.0185602	-0.44215	-0.416709	0.223093	0.654527	0.552393	0.563329	-0.0013058	0.735565	0.512476	0.430409	-0.6524	0.00820291	0.296734	0.829864	-0.411748	0.33105	0.507411	0.954897					-0.0288372	-0.377947	0.224399	-0.0810381	0.00506468	0.13292
YCL037C	SRO9	27.3448	33.8843	8.21395	1.11384	0.657247	1.32212	1.01399	-0.0842959	0.756426	1.29037	0.757186	1.36344	1.58696	-0.411511	0.942453	1.56329	0.30261	-0.274583	0.0554178	1.16633	1.39706	1.74297	1.4258	1.24511	1.82373	1.89096	1.53159	0.15731	0.71084	1.0018	1.25052	0.294931	0.973882	1.17332	1.32843	-0.272918	-0.806101	-0.199848	0.023675	-0.136928	0.887035	-0.0787861	-0.426664	0.717638	-0.105787	1.08688	0.0629202	1.08688
YCL038C	ATG22	40.501	26.3255	18.3764	-0.146531	-1.3251	-0.7023	-0.671411	0.278878	-0.187816	-0.476889	-1.84471	-1.12161	-1.31307	0.185315	-0.494538	-1.90132	-1.30692	-1.09502	-1.02847	-0.576699	-0.414122	-1.27572	-0.856747	-1.05818	-0.830506	-1.60417	-1.3827	-2.46871	-2.05084	-2.98256	-2.51677	-1.99694	-1.55274	-2.58977	-2.01686	1.42443	0.0566069	0.779707	0.588242	1.28033	0.533933	0.481477	0.416384	0.985591	0.525953	-0.245774	0.500623	-0.245774
YCL039W	GID7	163.969	91.0918	65.3088	0.0832531	-0.466907	-0.430223	-0.743001	0.941528	0.511231	-0.154692	-0.718304	-0.787625	-1.43626	1.27429	0.569304		-0.683534	-0.573563	-0.913348	-0.151604	-0.841628		-0.287267	-0.496442	-1.457		-0.655605	-1.50303	-1.52027		-1.66563	-1.15414	-1.06732		-1.26106					1.84785	1.48265	0.344838	0.615374		0.368339
YCL040W	GLK1	2786.98	1561.42	1252.83	0.413538	-0.384797	0.330498	0.285129	2.73539	2.5356	0.308425	-0.610531	0.146188	0.332825	4.22224	3.65008		1.75601	2.20793	1.42578	-0.0429804	-0.369174	-0.38197	-0.0244431	-0.352903	-0.764635	-0.569359	-0.32004	1.18627	0.385005	-0.324189	-0.133277	1.19296	0.675781	-0.0790284	0.0996423					2.01431	2.2243	0.309923	0.395462	-0.490331	0.295597
YCL041C
YCL042W
YCL043C	PDI1	358.091	222.377	147.43	1.66211	1.17852	2.05854	0.613234	1.43344	1.02695	2.05914	1.44138	2.26742	0.897389	2.08268	1.35415	1.56009	1.14751	1.09733	0.777484	1.29903	0.855323	1.35409	1.28235	1.42048	1.02982	1.4407	1.34843	1.60212	0.988978	0.86976	1.18536	1.55589	1.22835	1.04861	1.27057	0.499052	-0.11871	0.707337	-0.662698	0.985355	0.576663	-0.121442	-0.174502	0.392087	-0.0660825	-0.130674	0.278018	-0.130674
YCL044C	MGR1	63.4373	57.0633	51.395	-0.454004	0.143969	0.66969	0.079826	0.164542	-0.0932873	-0.90802	0.0834914	0.562559	-0.0204358	-0.00258079	-0.35068	-0.589244	-0.461857	0.558401	-1.19195	0.444652	-0.136469	0.220569	0.0253776	0.291469	-0.423615	0.128279	-0.256431	-1.16216	-1.75577	-1.14356	-1.43247	-0.856645	-1.28278	-0.852891	-1.05403	-0.318776	0.672735	1.1518	0.568808	-0.560982	0.841274	0.153183	0.287145	0.98117	0.281808	-0.310529	-1.71278	-0.310529
YCL045C
YCL046W		280.668	259.07	58.929	1.64706	1.25968	2.24574	1.60083	0.0196313	-0.0856784	2.03804	1.5479	2.49722	2.59673	-0.240721	-0.3391	1.52	2.61055	1.41989	2.04305	2.04424	1.68363	1.92762	2.10902	2.40522	2.24368	2.10475	2.40391	-0.128375	0.16858	1.69183	1.47356	0.0455978	0.477777	1.82503	1.52649	0.518041	0.0278941	0.977217	1.07673	-1.66061	-2.38215	-0.360975	-0.56005	0.279728	-0.294882	-3.35937	-2.63782	-3.35937
YCL047C		80.9994	49.2334	29.4292	-1.35736	-1.32827	-0.706395	-0.702388	-0.614296	-0.70049	-2.17469	-1.84887	-1.12664	-1.36638	-1.28249	-1.27475	-1.32755	0.0752441	-0.358844	-0.713399	-1.34282	-0.621132	-1.67435		-2.07056	-1.13387	-2.06571		-1.12457	-1.7229		-1.23256	-0.823837	-1.25271		-0.876506	-0.847133	-0.521313	0.200918	-0.0388235	-0.923647	-0.56135	0.727733	0.51274			-0.762267	-1.12457	-0.762267
YCL048W	SPS22	55.7732	36.3657	34.2025	-1.11531	-1.23493	-0.316592	-0.531054	-0.269702	-1.09965	-1.83528	-1.72636	-0.64814	-1.07156	-0.7162	-1.88221	-0.874496	-1.1346			-1.22011	-1.03433	-0.290103	-1.10339	-1.9084	-1.73941	-0.462993	-1.69761									-0.960788	-0.851861	0.226356	-0.197069			0.688288	0.705073		0.594217
YCL048W-A
YCL049C		268.65	176.795	118.45	-0.866727	-0.189278	0.0272463	-0.445031	0.774151	0.537681	-1.48673	-0.353906	-0.226065	-0.923547	0.999226	0.609557		0.73498	0.780869	0.571749	-0.0444623	0.293858	-0.958538	-0.519427	-0.354862	0.207016	-1.23693	-0.952021	0.101672	-0.238716	-1.15558	-0.668487	0.246372	0.105149	-0.864252	-0.375616					0.218358	0.0378079	0.310399	0.0868419	-0.372676	0.432594
YCL050C	APA1	258.415	165.699	105.107	0.681592	0.647124	0.137683	0.072832	-0.246047	0.532534	0.684285	0.7439	-0.0904998	-0.0324702	-0.677326	0.601725	0.801032	0.631662	-0.226802	0.0178928	0.421724	0.240752	0.358899	0.237541	0.261171	0.129191	0.288442	0.0144535	1.24948	0.726859	0.298087	0.164632	1.24813	0.988537	0.50869	0.364181	-0.116747	-0.0571325	-0.891532	-0.833502	-0.450524	0.583832	0.160553	0.111561	-0.220247	0.223088	1.47536	0.441008	1.47536
YCL051W	LRE1	129.92	94.374	70.2361	-0.168725	-0.265135	-1.29484	-0.0824473	0.623585	0.24614	-0.508009	-0.453471	-1.84897	-0.299656	0.751791	0.165876	0.384544	-0.0174555	-0.458607	-0.280301	-0.287204	-0.303178	-0.612107	-0.429726	-0.675628	-0.667921	-0.835819	-0.837492	0.357523	0.0695369	-0.661275	-0.104701	0.469667	0.387164	-0.397393	0.125017	-0.892553	-0.838015	-2.23352	-0.6842	1.2104	0.446177	0.388424	0.364743	-0.438426	0.407767	2.67969	3.44392	2.67969
YCL052C	PBN1	108.876	76.5416	54.2706	0.38472	1.10255	-0.31775	-0.309934	0.0801737	0.399908	0.268018	1.34166	-0.649561	-0.691089	-0.141228	0.399888	-1.25726	-0.1241	0.0251512	-0.648133	-0.736193	-0.462366	-0.455019	-0.538364	-1.26894	-0.901206	-0.653938	-0.976199	-0.520934	-0.747455	-1.23531	-1.36801	-0.29701	-0.360289	-0.939548	-0.996784	1.52527	2.59891	0.607695	0.566167	-0.166379	1.04802	0.532743	0.43884	0.28561	0.437835	0.440325	-0.774074	0.440325
YCL054W	SPB1	90.9507	86.3147	64.7354	0.212413	0.229144	0.468518	0.302877	-0.8944	-0.626786	0.0264125	0.195287	0.315612	0.363363	-1.7428	-1.16258	1.25204	-1.14703	-1.66105	-0.814986	0.340646	0.615021	0.822961	0.257327	0.154032	0.677669	0.825748	0.039715	0.456834	-0.554407	0.662229		0.556341	-0.183672	0.852609		-1.22563	-1.05676	-0.93643	-0.888679	-0.0817563	-0.347598	0.186614	-0.0626489	-0.0268606	0.217612	0.588832	0.854673	0.588832
YCL055W	KAR4	90.9102	66.6787	43.6787	0.674928	0.136307	0.122684	0.520432	0.410584	0.349971	0.67494	0.0734354	-0.108912	0.737707	0.401755	0.323891	0.149149	0.199106	-0.372548	0.112555	0.313611	-0.404379	0.795354	0.723735	0.118308	-0.816228	0.793784	0.635211	-0.311126	-0.635172	0.287941		-0.113899	-0.257562	0.499107		0.525792	-0.0757134	-0.258061	0.588558	0.774302	0.211337	0.195303	0.411849	0.294677	0.0885241	0.469397	1.03236	0.469397
YCL056C		97.5624	56.829	26.4886	-0.182417	0.2292	0.408823	0.0691276	1.17542	0.0585378	-0.527207	0.19536	0.242334	-0.0388443	1.65865	-0.119625	-0.156323	-0.203793	0.351667	0.00835654	0.684792	0.298604	0.350692		0.608798	0.213971	0.27894		-0.0156314	-0.323648	-0.472776	-0.209749	0.143995	0.0274453	-0.219363	0.0317363	-0.370884	0.351683	0.398657	0.117479	1.30698	-0.127982	0.0759945	0.0846327	0.498303		-0.526639	0.908324	-0.526639
YCL057C-A
YCL057W	PRD1	218.838	153.291	108.328	-0.0290062	0.356247	-0.368426	-0.0181663	0.0925639	0.390307	-0.312099	0.362113	-0.711767	-0.189049	-0.120866	0.385276	0.18896	-0.229051	-0.259584	-0.340485	-0.0589377	-0.0783804	0.332065	-0.0813775	-0.37399	-0.338487	0.257373	-0.392732	0.090452	-0.313321	-0.345965	-0.316088	0.23658	0.0368936	-0.0995942	-0.0626911	-0.501059	0.173153	-0.900727	-0.37801	0.138717	0.725761	0.315052	0.260107	0.356967	0.311355	1.62649	1.03944	1.62649
YCL058C	FYV5	54.5847	38.5159	20.2475	0.308419	-0.045734	0.53543	-0.0118583	0.819914	1.00507	0.161031	-0.1655	0.397749	-0.178195	1.07443	1.32085		0.0383825	0.712464	0.849399		0.4677	0.261563			0.461777	0.175744				-0.731341	-0.270074			-0.463568	-0.0218311					0.361967	0.471448		0.00592382	0.639313
YCL058W-A
YCL059C	KRR1	46.5221	37.0476	21.0485	0.00586496	0.131924	0.296201	-0.0452866	-1.09551	-0.612496	-0.263203	0.0676818	0.104087	-0.235715	-2.07329	-1.14084	0.300834	-1.00685	-1.04449	-0.291694	-0.0158157	0.797768	-0.0667113	0.135554	-0.317007	0.945479	-0.204343	-0.115761	-1.0175	-0.754985	-0.299686		-0.730393	-0.367178	-0.0558854		-0.564037	-0.233152	-0.196747	-0.536549	-1.0288	-0.849143	0.301191	-0.147712	-0.148457	0.251315	-0.652395	-0.832055	-0.652395
YCL061C	MRC1	68.9519	59.0196	42.0914	-0.37734	-0.166271	-0.728349	0.0711901	-0.00778287	-0.546663	-0.800524	-0.323708	-1.15359	-0.0352955	-0.285772	-1.04065	-0.580628	-1.10055	-1.31913	-1.17777	-0.261569	0.135598	-0.191348	-0.232593	-0.641752	-0.0249084	-0.348651	-0.585799	-0.912253	-2.10225	-0.169702		-0.638535	-1.59977	0.0668794		-0.219896	0.25692	-0.572958	0.545333	1.03336	0.137121	0.380184	0.160507	-0.415531	0.353207	0.710079	1.60632	0.710079
YCL063W	VAC17	162.68	90.6644	49.2041	0.314258	0.526766	1.53038	0.798589	0.0775639	0.0113822	0.169218	0.585925	1.61908	1.21633	-0.145517	-0.191389	-0.0607969	-0.0743987	0.696192	0.180724	0.745405	-0.0102147	0.465215	0.503116	0.688893	-0.238593	0.411539	0.353531	-0.939632	-0.877553	-0.714647	-0.411436	-0.66243	-0.479313	-0.447802	-0.147359	0.230015	0.646722	1.67988	1.27712	-0.841709	-0.372113	0.0565117	0.228378	0.85934	0.149585	-2.05199	-2.52159	-2.05199
YCL064C	CHA1	214.067	192.924	113.235	1.30957	1.13385	2.03978	1.60169	1.60469	2.24987	1.56483	1.38274	2.24439	2.59821	2.3641	3.21524		0.861137	0.996972	1.28781	0.0343149	1.39489	1.9071	2.69422	-0.250763	1.82054	2.081	3.15107	-0.24855	0.19942	1.09801	1.51698	-0.0592856	0.505992	1.26419	1.56504					1.36713	1.92743	0.285078	-0.425652	0.816803	-0.456847
YCL065W		97.106	58.4212	27.8115	-0.0642836	0.280668	0.743105	0.577042	0.59138	1.1429	-0.361564	0.262914	0.652678	0.835115	0.698867	1.53062	-0.611346	0.516744	0.891869	0.818921	0.808443	0.901363		0.275202	0.772193	1.0973		0.062538	-1.15161	-0.973499		-0.852115	-0.847438	-0.567092		-0.538675	0.249782	0.87426	1.26402	1.44646	-0.193002	0.711695	0.0362495	-0.195932		0.212664	-0.55233	-1.45703	-0.55233
YCL066W	HMLALPHA1	224.698	135.77	64.9933	1.32197	0.506719	0.594236	0.179376	0.268469	0.888166	1.58221	0.559614	0.469935	0.150857	0.168209	1.14294	-0.399806	-0.0264574	1.01312	0.825791	0.763498	0.696754	0.304586	0.663768	0.712801	0.797447	0.225558	0.558647	0.251542	0.333258		-1.78756	0.377172	0.628438		-1.36933	1.98202	0.95942	0.869741	0.550663	-0.844907	0.31715	0.0506962	-0.100693		0.105121	-0.552591	-1.71465	-0.552591
YCL067C	HMLALPHA2	147.062	95.8528	97.8845	-0.31643	-1.28816	-0.819646		0.689582	-0.163715	-0.715118	-1.79623	-1.26566		0.860248	-0.45786		-0.574061	-0.570332	-0.554665	0.110476	0.647759	-1.18816		-0.150121	0.725646	-1.5028		0.0284387	-0.705686		-1.13117	0.182457	-0.322075		-0.786469					1.43058	0.0968043	0.260597	-0.0778874
YCL068C		58.9928	32.8348	17.2588	-0.611849	0.298849	0.458307	-0.508245	-0.171151	-0.46229	-1.12935	0.286777	0.303078	-1.03232	-0.554244	-0.912245	-1.96236	-0.20126	-0.0641411	-0.46317	-0.579498	-0.84503		-1.25126	-1.06187	-1.46199		-1.8864	-1.99273	-1.53189			-1.58153	-1.07795			0.833015	2.24914	2.26544	0.930044	-0.490103	-0.449075	0.482376	0.616957		0.635142	-2.71451	-2.75554	-2.71451
YCL069W	VBA3	16.2132	11.3683	6.80499	-0.838599	-0.550408	-1.23608	-0.305255	-0.73528	-1.13826	-1.44729	-0.827902	-1.77685	-0.683037	-1.48131	-1.94097	-1.68359	-1.83074	-1.61094	-2.07493	-1.19448	-0.922621	-1.18597	-1.24392	-1.87453	-1.57569	-1.50025	-1.87704	-2.92303	-2.55082	-2.58131	-2.65007	-2.39345	-2.01015	-2.2108	-2.13523	0.236302	0.855691	-0.093253	1.00056	0.129634	0.133958	0.68005	0.653074	0.710544	0.633112	0.227211	0.222887	0.227211
YCL073C		57.2494	38.3959	30.469	-0.537311	-0.393061	-0.492249	-0.544672	-0.453713	-0.783807	-1.02483	-0.621378	-0.863765	-1.095	-1.0186	-1.40154	-2.6179	-1.6075	-1.5027	-1.47405	-0.751161	-0.877471	-0.866405	-1.20002	-1.28872	-1.50953	-1.13025	-1.82098	-3.18855	-2.81259	-2.66683	-3.51736	-2.62518	-2.24965	-2.29156	-2.90537	1.59307	1.99652	1.75413	1.5229	0.484099	0.0725101	0.537554	0.632058	1.16131	0.620962	-1.68162	-1.27003	-1.68162
YCL076W		18.3715	9.27433	7.82784	-1.06766	-0.475193	-1.43123	-0.980715	-0.969622	-1.65032	-1.76848	-0.729179	-2.0164	-1.84529	-1.86642	-2.72024		-1.96215			-1.57357	-1.70222			-2.37547	-2.71817																	0.801901	1.01595
YCR001W		129.46	28.8421		-0.264906	0.370312			0.544013											-0.207023			-0.901801				-1.17124
YCR002C	CDC10	195.118	126.617	77.5302	0.839491	-0.369307	-0.185967	-0.171286	-0.475438	-0.0661638	0.905686	-0.590201	-0.487793	-0.452519	-1.0543	-0.309402	-0.0195993	0.176884	0.269636	0.0341842	-0.109762	-0.0403278	0.0125888	0.839502	-0.441151	-0.282722	-0.112526	0.783019	-0.218011	-0.0622933	-0.959756	-0.571037	-0.0326323	0.266555	-0.679298	-0.289082	0.925285	-0.570602	-0.468193	-0.43292	-1.32393	-0.343586	0.331389	0.242395	0.566772	0.0564834	0.124607	-0.85574	0.124607
YCR003W	MRPL32	279.839	197.02	125.882	0.654635	-0.142054	0.0477712	0.117531	0.0529436	-0.117825	0.646486	-0.291923	-0.20087	0.0444427	-0.185977	-0.388022	0.143578	1.30992	0.61085	0.91331	-0.17248	-0.202419	0.159087	0.80197	-0.524028	-0.520262	0.0570936	0.735098	0.259565	-0.198654	-0.291893	0.363629	0.384174	0.141801	-0.0485254	0.540887	0.502908	-0.435501	-0.344448	-0.0991355	-0.796826	-1.30133	0.351548	0.317843	0.105619	0.0668712	-0.956884	-0.452379	-0.956884
YCR004C	YCP4	565.183	381.117	200.315	-0.521242	-0.887348	0.0858023	-0.156552	0.339308	0.67943	-1.0023	-1.27015	-0.154185	-0.427167	0.284623	0.825278		0.856959	1.33019	1.12607	0.512378	0.147436	-0.0151616	0.0965656	0.380964	-0.00756096	-0.144657	-0.16554	-0.547615	-1.07553	-1.04999		-0.320296	-0.660438	-0.764519						-1.04556	-0.300793	0.131414	0.154997	0.619862	0.262106
YCR005C	CIT2	2626.55	1001.95	781.766	1.74036	1.7015	1.54752	0.962818	0.360206	0.09826	2.16887	2.12781	1.64012	1.49891	0.318966	-0.0591742	2.6966	0.942369	1.58614	1.62465	1.67982	0.88735	1.73492	1.77764	1.92366	1.07676	1.88164	1.9808	3.45066	1.53467	1.98325	2.80178	3.16921	1.72759	2.10027	2.70593	-0.527738	-0.568796	-1.05648	-1.19769	-1.26718	-1.68382	-0.243839	-0.189409	-0.218625	-0.203165	-0.627343	-0.210695	-0.627343
YCR006C		478.454	238.456	147.349	-0.132726	-1.1765	-0.0328647	-0.88458	-0.567457	-0.259278	-0.457532	-1.64967	-0.299853	-1.67987	-1.20552	-0.603293	-0.0194927	1.59303	1.42585	1.79903	-0.443786	-0.764765	-0.343817	-1.21005	-0.88254	-1.34436	-0.525184	-1.83379	0.0478489	-0.685934		0.423669	0.199398	-0.304004		0.594202	-0.43804	-1.63018	-0.280361	-1.66038	-2.63137	-2.40233	0.438754	0.579597		0.623738	-2.12197	-2.35101	-2.12197
YCR007C		131.722	89.3182	51.574	-0.657704	-1.22208	-0.605401	-0.227124	0.0435917	0.0710244	-1.19364	-1.70949	-1.00266	-0.5486	-0.201345	-0.100623	-0.865561	-0.254249	-0.276534	0.0829205	-0.890549	0.0520015	-0.610221	-0.996734	-1.47291	-0.147417	-0.833635	-1.56143	0.354453	-0.713717	-1.14627	-1.13155	0.466988	-0.329423	-0.855457	-0.786813	-0.328082	-0.843931	-0.137102	0.316961	0.0751883	-0.183543	0.582358	0.199418	0.0218222	0.564698	-0.0464408	0.21229	-0.0464408
YCR008W	SAT4	181.631	116.999	81.7809	0.0482116	0.560523	0.442484	0.297144	0.653736	0.413398	-0.203826	0.630233	0.283655	0.3535	0.801342	0.420418	0.282309	-0.324159	-0.201659	-0.244849	0.306588	0.184571	0.719307	0.973545	0.109027	0.0468588	0.705734	0.954161	1.03573	0.529883	0.539036	0.279404	1.06157	0.808327	0.736257	0.466097	-0.486135	0.347924	0.0013457	0.0711908	1.003	0.665267	0.197561	0.137712	-0.0305225	0.0193843	0.663922	1.00166	0.663922
YCR009C	RVS161	384.296	265.909	149.315	0.0408192	-0.459114	-0.027522	0.093396	0.10834	0.529467	-0.214191	-0.708074	-0.293295	0.00291388	-0.094941	0.597056	0.753802	1.01661	0.798573	0.944503	-0.291481	0.0172313	-0.091535	-0.301024	-0.681279	-0.198371	-0.233084	-0.673171	1.6049	0.807757	0.700273	0.448212	1.55832	1.06255	0.888539	0.615996	-0.967994	-1.46188	-1.0471	-0.750889	-0.893514	-0.347447	0.389799	0.215603	-1.12162	0.372146	0.69965	0.153583	0.69965
YCR010C	ADY2	59.6634	38.5745	19.132	0.241497	-1.03374	-0.486349	-0.815784	-1.35647	-1.0264	0.0671939	-1.4623	-0.856522	-1.5615	-2.50214	-1.77073	-2.35326	-0.971476	-0.444323	-0.597963	-0.883599	-0.867007	-1.44018	-1.0746	-1.46372	-1.49419	-1.79459	-1.66084	-1.37123	-1.7322	-2.6957	-2.35513	-1.03911	-1.26122	-2.31884	-1.87333	2.42046	0.890967	1.49674	0.791769	-2.05782	-1.17276	0.580124	0.627187	0.524245	0.586247	-2.66951	-3.55456	-2.66951
YCR011C	ADP1	165.374	102.887	81.8346	-0.477352	0.889428	0.568422	0.336645	0.22145	0.438044	-0.940759	1.06193	0.438248	0.421469	0.0909393	0.457925		-0.382539	0.0299063	0.264861	-0.212923	-0.136314	-0.103268		-0.577471	-0.423388	-0.246669		-1.66512	-1.91673	-1.07112	-1.85736	-1.2956	-1.43004	-0.784481	-1.43132					0.061033	0.193063	0.364548	0.287073	0.537812
YCR012W	PGK1	1319.83	695.916	501.028	2.96711	3.70378	3.15215	2.13588	2.78181	2.38001	3.88898	4.75587	3.60987	3.51738	4.29853	3.41329	3.09531	1.91442	2.36946	2.05712	2.68147	1.91932	2.78235	2.31632	3.24726	2.58908	3.09439	2.66857	2.57459	2.65724	2.59474	2.82595	2.40462	2.75461	2.6778	2.72739	0.793669	1.66056	0.514564	0.42207	1.92907	1.35617	-0.565798	-0.669758	0.416588	-0.352254	0.841608	1.4145	0.841608
YCR013C		2285.71	633.765	678.576	3.00786	4.26591	3.37908	1.87847	2.89469	2.40972	3.94612	5.49368	3.88843	3.07445	4.48404	3.45851		2.9192	3.11436	3.1087	2.69823	2.31414	2.81152	2.39596	3.26941	3.16768	3.12817	2.77026	3.62235	3.45951	3.23748	3.43832	3.31906	3.4886	3.28484	3.27117					1.36968	0.349815	-0.571186	-0.853535	-0.156667	-0.374297
YCR014C	POL4	66.3227	40.6127	25.8564	-0.756743	-0.435088	-0.259862	0.0396183	0.452579	0.106316	-1.33251	-0.67654	-0.578501	-0.0896205	0.470768	-0.0469145	-0.442258	-1.58586	-1.27537	-1.122	-0.3212	-0.0322966	0.027661	0.418638	-0.720551	-0.270953	-0.0950753	0.245672	-1.00865	-0.956607	-0.620577	-0.898235	-0.722667	-0.551639	-0.358956	-0.579629	-0.890255	-0.234282	-0.136243	0.352638	1.74614	1.07508	0.399351	0.238656	0.26388	0.172966	1.21133	1.88238	1.21133
YCR015C		78.2603	53.7427	63.1237	0.736637	0.302937	0.00502862	0.480101	0.0906879	-0.552739	0.761467	0.292142	-0.253338	0.66831	-0.123949	-1.0499	-0.510178	-0.163424	-0.74427	-0.148858	0.65938	1.38198	0.473625	0.282044	0.575217	1.80163	0.421276	0.0712732	-0.771546	-0.55565	-1.151	-0.613593	-0.515733	-0.18481	-0.859925	-0.326871	1.27165	0.80232	0.25684	1.17849	0.620321	-0.901037	0.0841629	-0.419645	1.2812	0.210771	-1.15788	0.36348	-1.15788
YCR016W		61.6745	53.3236	23.2146	0.483505	-1.27343	-1.30081	-0.00664748	-0.750099	-1.27046	0.406531	-1.77689	-1.8563	-0.169229	-1.50566	-2.14215	-0.0698968	-0.916641	-1.50496	-0.462412	-0.322504	0.0681476	0.0660086	-0.217883	-0.722274	-0.123755	-0.0506752	-0.567018	-0.911472	-0.295567	-0.306479	0.304214	-0.637854	0.0531359	-0.0623017	0.488128	0.476428	-1.70699	-1.78641	-0.0993323	-0.000701614	-1.67974	0.39977	0.191903	0.0116265	0.349135	0.106665	1.7857	0.106665
YCR017C	CWH43	95.5302	60.9555	39.2447	-0.604566	-0.752688	-0.332072	-0.345149	1.06608	0.4213	-1.11913	-1.0934	-0.667142	-0.751682	1.47897	0.432443	-0.189162	-0.829971	-0.885196	-1.26857	0.230252	0.033039	-0.268361	0.265913	0.00815388	-0.175206	-0.437819	0.0506783	-1.36721	-1.21852	-2.10239	-1.04742	-1.03561	-0.791254	-1.75848	-0.7121	-0.929973	-0.904239	-0.47798	-0.56252	2.36417	1.70101	0.222098	0.208245	1.32066	0.215235	2.17899	2.84215	2.17899
YCR018C	SRD1
YCR018C-A
YCR019W	MAK32	48.4737	33.7039	20.3203	1.20693	-0.58767	-1.21614	-0.685916	-0.537869	-0.343997	1.4209	-0.876809	-1.75237	-1.33803	-1.15689	-0.732222	-1.5744	-0.60369	-0.413678	-0.789163	-1.16862	-0.746988	-1.34802		-1.84035	-1.31831	-1.68788		-1.41215	-1.65835	-1.1402		-1.07483	-1.19365	-0.849718		2.9953	0.697592	-0.177966	0.236367	-0.743215	0.056941	0.671737	0.571322	-0.838166		0.234907	-0.565249	0.234907
YCR020C	PET18	142.825	86.4224	64.012	-0.309056	0.208591	-1.3084	-0.860478	-0.19376	-0.424507	-0.704778	0.16831	-1.86562	-1.6384	-0.591399	-0.854746	-2.15103	-0.775712	-0.156188	0.0785714	-0.768138	0.196319	-0.0397747	-0.208408	-1.31115	0.0640755	-0.173154	-0.554922	-0.836661	-0.799348	-1.32887		-0.572563	-0.407764	-1.02792		1.44625	2.31934	0.285409	0.512631	-0.435212	-0.933317	0.543011	0.132243	0.854763	0.346513	-1.21873	-0.720621	-1.21873
YCR020C-A	MAK31	204.438	108.446	69.0789	-1.1226	-0.268666	0.641714	0.405686	-1.15792	-0.000630683	-1.84551	-0.458105	0.528217	0.540264	-2.17587	-0.209671	0.0042431	1.62344	1.2121	1.15498	0.318825	0.161557	0.498686	-0.709071	0.125198	0.0131328	0.450293	-1.19415	-0.0173409	-0.627555		-0.277515	0.142503	-0.250594		-0.0284388	-1.84975	-0.462348	0.523974	0.536021	-3.38797	-1.36465	0.193627	0.148424		0.485081	-1.88863	-3.91194	-1.88863
YCR020W-B	HTL1	398.553	258.994	149.929			-0.488782		-0.525806	-0.29191			-0.859509		-1.13707	-0.652953		0.901729	0.577468	0.535211	-0.277837	0.12422	-1.6628		-0.66325	-0.0415831	-2.05234		0.636108	-0.170845		-0.195023	0.712804	0.167242		0.0448127					-1.71454	-1.18816	0.385413	0.165803
YCR021C	HSP30	504.515	360.421	345.08	-0.0996274	0.102977	-0.382968	-0.480158	-0.426907	2.03854	-0.411122	0.0296878	-0.729618	-0.98399	-0.974543	2.89363		1.14472	0.177402	2.31078	-0.738906	-0.801213	-0.764623	-0.813181	-1.27252	-1.39778	-1.01241	-1.32708	2.7156	2.78802	-1.11531	0.0143792	2.52769	2.87426	-0.826212	0.230759					-1.15195	0.582854	0.533615	0.596562	-0.186195	0.513896
YCR022C		97.0857	50.2996	55.1745	-0.952104	-1.32782	-1.66912	-1.29579	-1.6132	-0.211891	-1.60644	-1.84828	-2.30842	-2.38744	-2.92405	-0.531177		0.558019	0.702024	0.40271	-0.693963	-1.47319			-1.21313	-2.38254			-0.808636	-1.45601			-0.548104	-1.00853							-3.62608	-0.933887	0.519169	0.909347
YCR023C		153.151	95.5321	73.5138	0.128496	0.114896	-0.302606	0.270506	0.35814	0.524863	-0.0912525	0.0453324	-0.630971	0.307664	0.31557	0.590049	-0.0795801	-0.478846	-0.432984	-0.280576	-0.071158	0.278418	-0.188054	0.103882	-0.390138	0.18439	-0.344836	-0.156199	-0.317089	-0.291178	-0.902046	-0.778996	-0.119103	0.0571517	-0.624793	-0.473746	-0.0116724	0.124913	-0.551391	0.387244	0.748555	0.870625	0.31898	0.0940286	0.279957	0.260081	1.42202	1.29995	1.42202
YCR024C	SLM5	71.5284	50.3532	36.8214	0.363688	0.368981	0.161777	-0.089131	0.487843	-0.151901	0.238527	0.378828	-0.0609231	-0.311157	0.528719	-0.439881	-1.05781	-0.334307	-0.458607	-0.820874	-0.194679	-0.105382	-0.00900593	-0.109249	-0.553363	-0.378057	-0.137529	-0.428318	-1.18932	-1.14354	-1.32128	-2.14216	-0.88035	-0.722656	-1.02074	-1.68421	1.29634	1.43664	0.996892	0.746658	0.987326	0.380993	0.358684	0.272675	0.883215	0.319069	-0.615899	-0.0095658	-0.615899
YCR024C-A	PMP1	65.6145	39.2691	35.6232	0.240256	0.380523	0.959074		1.08218	0.730828	0.0654535	0.393977	0.917788		1.50543	0.903497		1.75741	1.69996	1.9114			1.58756				1.71102				0.302355				0.512721						-0.194529	-1.00791			1.1983
YCR024C-B
YCR025C		261.714	175.409	121.97	-1.14849	-1.48399	-0.688505	-0.604586	-0.445259	-0.38824	-1.88182	-2.05326	-1.10468	-1.19809	-1.0047	-0.799553	-0.418941	0.704549	0.652545	1.06674	-0.450085	0.0486339	-0.174737	0.528213	-0.890864	-0.152352	-0.329418	0.385574	-0.152318	-0.181655	-0.495611	-0.463698	0.0247009	0.157353	-0.24093	-0.193767	-1.46287	-1.63432	-0.685735	-0.779149	-1.65725	-1.86629	0.440779	0.200986	-0.0884888	0.142639	-1.18055	-0.971513	-1.18055
YCR026C	NPP1	131.053	103.946	70.0527	0.629582	0.130972	-0.174689	0.036346	0.158813	-0.0177821	0.611356	0.066432	-0.473947	-0.095251	-0.0119948	-0.235772	0.729277	-0.468938	-0.547789	-0.619681	-0.28174	-0.304299	0.0408738	-0.0687166	-0.668408	-0.669564	-0.079777	-0.376567	0.121894	-0.021666	-0.163031	-0.0858025	0.264021	0.303724	0.07318	0.141799	-0.117921	-0.662845	-1.20322	-0.824528	0.535794	0.383908	0.386668	0.365265	-0.152957	0.307851	1.58713	1.73902	1.58713
YCR027C	RHB1	230.955	149.315	70.5194	0.526297	-1.44003	-0.638885	-0.363279	-0.309357	0.0531521	0.466534	-1.99556	-1.04377	-0.782879	-0.781366	-0.127822	-0.0342361	0.738674	0.428138	0.933813	-0.22613	-0.150241	-0.266106	-0.481661	-0.594923	-0.443796	-0.435208	-0.903803	0.0155029	-0.203863	-0.949727	-0.16747	0.171168	0.137035	-0.669826	0.0692792	0.50077	-1.96132	-1.00953	-0.748643	-1.2095	-1.06163	0.368793	0.293556	0.234619	0.422141	-0.0521051	-0.199974	-0.0521051
YCR028C	FEN2	233.065	119.795	71.2569	-0.834261	-0.559736	-0.624875	-0.084645	0.375288	-0.594706	-1.44121	-0.840145	-1.02657	-0.303438	0.343751	-1.11376	-1.64173	-0.984935	-0.00118604	-0.974036	-0.586424	-0.550047	-1.52885	-0.527556	-1.07103	-1.0297	-1.89725	-0.962399	-2.58967	-2.65223	-1.9598	-2.33656	-2.10251	-2.10293	-1.62381	-1.85684	0.200525	0.801587	0.615165	1.33829	0.344937	-0.139726	0.484602	0.479653	-0.273444	0.434843	-0.754891	-0.270228	-0.754891
YCR028C-A	RIM1																						-0.627241				-0.853342
YCR030C	SYP1	222.542	159.242	78.1397	-0.117898	0.756365	0.710194		0.520984	0.417989	-0.436741	0.887282	0.612279		0.583181	0.427404		0.219198	-0.289891	-0.30342			-0.187951				-0.344717		0.842085		-1.58459		0.892571		-1.26943						0.873073	0.730824			0.924715
YCR031C	RPS14A	252.675	327.655	127.08	2.16452	2.08293	2.51116	2.23302	1.31706	0.930414	2.76361	2.62844	2.82303	3.68452	1.89142	1.20724	1.12795	1.65308	1.02993	1.35012	1.94694	2.47431	2.4915	2.25126	2.27663	3.4024	2.75763	2.5855	0.653186	0.583943	2.19874	1.02174	0.727709	0.857786	2.30379	1.12528	1.63565	1.50049	1.69508	2.55656	0.861497	-0.142884	-0.329697	-0.928088	0.453842	-0.334247	-1.83796	-0.83358	-1.83796
YCR032W	BPH1																						-0.42701				-0.621507				-1.85968				-1.52925										0.907741
YCR033W	SNT1	243.378	139.403	77.1088	0.358484	0.113992	0.0787692	0.359452	0.951779	0.146453	0.23123	0.044146	-0.162819	0.460711	1.29113	0.0141682	0.690036	-0.742172	-0.410552	-0.488441	0.0912776	0.0916065	0.721307	0.379908	-0.175491	-0.089377	0.70805	0.196224	0.522622	0.0855474	0.778747	0.522483	0.613759	0.401812	0.962656	0.681947	-0.458806	-0.64589	-0.852854	-0.229324	1.70169	0.502609	0.266768	0.180983	-0.254606	0.183685	1.35546	2.55454	1.35546
YCR034W	FEN1	26.4559	14.3589	6.07581	0.658601	0.420924	0.407658	0.572295	0.350497	0.273734	0.652046	0.447005	0.240905	0.826945	0.30301	0.207871	-1.08295	-0.113069	-0.528953	-0.784425	0.930915		1.22967		0.934032		1.29665			-1.51345	0.728703			-1.06108	0.915391		1.735	1.52996	1.32386	1.9099	0.831963	0.992296	-0.003117		0.381258		-0.331564	-0.491896	-0.331564
YCR035C	RRP43	104.286	76.8534	53.5134	-0.222001	0.0417719	0.447095	0.432809	0.960198	-0.102426	-0.582712	-0.0506455	0.289315	0.586935	1.30497	-0.364587	0.532282	-0.0460112	-0.533234	-0.17802	0.81032	0.728785	1.03896	0.797566	0.774675	0.844388	1.07584	0.729476	-0.480065	-0.7632	0.349794	0.128277	-0.261342	-0.374693	0.557525	0.331898	-1.11499	-0.582928	-0.242967	0.0546528	1.8382	-0.186567	0.0356459	-0.115603	0.51832	0.06809	0.0564005	2.08117	0.0564005
YCR036W	RBK1	205.796	149.769	98.0139	0.390502	0.883626	0.972806	0.125495	0.7168	0.67842	0.276125	1.05432	0.934645	0.0581455	0.904977	0.82374	0.693632	0.420635	0.645746	0.376152	0.835983	0.471467	0.314782	0.901666	0.808586	0.467297	0.237363	0.862387	0.615297	0.0901723	-0.274547	0.644989	0.69464	0.406043	-0.0321428	0.790731	-0.417507	0.360685	0.241013	-0.635486	0.259231	0.447588	0.027397	0.00417056	0.269505	0.0392784	0.206575	0.0182173	0.206575
YCR037C	PHO87	150.215	86.1727	53.7166	0.267003	0.287495	0.946782	0.471237	0.874161	0.312268	0.102958	0.271875	0.902699	0.653058	1.16358	0.266513	0.52291	-0.801392	-0.630405	-0.736095	0.85293	0.75471	0.429786	0.84046	0.83098	0.88238	0.370517	0.784242	-0.231803	-0.443629	-0.498288	-0.301884	-0.0446698	-0.0823231	-0.243458	-0.050078	-0.419952	-0.251035	0.379789	0.130148	1.79398	1.00261	0.02195	-0.12767	0.613976	0.0562182	0.62282	1.41419	0.62282
YCR038C	BUD5	84.0609	47.8369	38.9308	-0.592119	-0.697399	0.0954931	-0.579483	0.118147	-0.34912	-1.10168	-1.02083	-0.142289	-1.1549	-0.0788247	-0.740018		-1.32137	-1.5482	-1.4115	-0.276914	-0.654803	-0.987796	-0.487196	-0.66203	-1.18322	-1.2708	-0.910868	-1.34495	-2.00025		-1.6685	-1.01617	-1.50645		-1.26361					1.46938	0.67148	0.385116	0.528413		0.423673
YCR038W-A
YCR039C	MATALPHA2	108.154	73.701	49.1008	-0.155084	-0.983386	0.0234777	0.0319973	-0.332498	0.166822	-0.488882	-1.3962	-0.230691	-0.102734	-0.819396	0.0451669	-1.17346	-0.336564	-0.498487	-0.540734	0.0025649	0.26975	-0.748063	-0.874782	-0.292718	0.171686	-0.993234	-1.40573	-0.362669	-0.607911		-1.38446	-0.158884	-0.232622		-1.01139	0.684574	-0.222744	0.942765	1.07072	-0.320909	0.585901	0.295283	0.0980635		0.530945	-0.356864	-1.26367	-0.356864
YCR040W	MATALPHA1	101.766	85.7055	39.1958	1.03782	0.217178	-0.267612	-0.152011	-0.0996961	-0.0212998	1.18378	0.179581	-0.588014	-0.419354	-0.436819	-0.241126		-0.98518	-0.620681	-0.263993	0.222774	0.557813	-0.182285	-0.00711259	-0.0017275	0.593834	-0.338157	-0.297913	0.244099	0.258315	-2.12863		0.370676	0.559874	-1.78326						0.183863	0.0228671	0.224501	-0.0360209	1.4451	0.290801
YCR041W		34.6821	24.725	17.1501	-1.2333	-0.0558067	0.161036	0.563588	0.454488	0.942901	-2.00074	-0.178721	-0.0618336	0.811965	0.473906	1.22624	-0.862266	0.294322	0.0422984	0.420569	0.465232	0.881209		-0.050721	0.318665	1.06776		-0.353591	-1.10942	-1.14069		-0.872882	-0.810612	-0.720053		-0.557116	-1.13847	0.683545	0.800433	1.67423	0.431607	0.80567	0.146568	-0.186551		0.30287	0.00523754	-0.368825	0.00523754
YCR042C	TAF2	43.1012	32.5577	20.0397	0.0714876	-0.13733	-0.180006	0.164412	0.347732	-0.104509	-0.171189	-0.285722	-0.480475	0.125109	0.298467	-0.367758	-1.53454	-0.8135		-1.31365	-0.0281609	-0.374086	-0.451362	-0.181245	-0.33332	-0.771834	-0.649704	-0.52024			-2.18505	-2.52033			-1.83654	-2.02003	1.36335	1.24882	1.05406	1.65965		0.945891	0.30516	0.397748	1.18684	0.338995	-0.108174		-0.108174
YCR043C		50.0413	40.7294	17.1754	-0.059824	0.698877	0.306103	0.280139	-0.237226	-0.384723	-0.355311	0.811826	0.116242	0.324239	-0.66283	-0.7942		0.0367324	-0.160073	-0.0762912	0.421989	0.677454	0.0968282	-0.0903916	0.261522	0.769164	-0.0149913	-0.404241	-1.0898	-0.820246	-1.11141	-1.12064	-0.793489	-0.426884	-0.82253	-0.777124					-0.502756	-0.717909	0.160467	-0.0917099	0.807539	0.31385
YCR044C	PER1	84.9902	74.8303	46.3598	0.499855	0.811252	1.29183	0.179481	0.508703	-0.0137191	0.429457	0.959323	1.32625	0.151038	0.563	-0.229589		0.207411	-0.300126	-0.048186	-0.0229375	-0.173418	0.324329	0.501997	-0.326418	-0.477762	0.248416	0.352103	-0.851609	-0.811214	-0.45613		-0.585608	-0.41862	-0.203642						0.863126	-0.181403	0.303481	0.304344	0.452058	0.149894
YCR045C		119.679	87.7997	65.3699	-0.616169	-1.08574	0.253863	-0.00227102	0.441021	-0.0472263	-1.1354	-1.53054	0.0521151	-0.161699	0.451774	-0.280582	0.00875787	0.19888	-0.676924	-0.705446	0.079176	-0.377463	-0.0998854	0.0473519	-0.191482	-0.776783	-0.242753	-0.228375	-1.24912	-1.25206	-0.767987	-0.831657	-0.932537	-0.821941	-0.498179	-0.520509	-1.14416	-1.5393	0.0433573	-0.170457	1.1287	0.424864	0.270658	0.39932	0.255427	0.275726	0.381507	1.08534	0.381507
YCR045W-A
YCR046C	IMG1	390.192	254.139	224.716	0.393064	0.323027	0.795488	0.0953481	0.343774	0.580184	0.279717	0.318512	0.71698	0.00627266	0.291962	0.674241	0.594726	2.07891	1.53792	1.75584	0.820463	0.76981	0.669979	0.470171	0.788078	0.904509	0.648621	0.311468	0.61021	0.581561	0.180059	0.853827	0.690201	0.855607	0.397216	0.976176	-0.315009	-0.276215	0.122254	-0.588453	-1.24596	-1.0816	0.0323856	-0.134699	0.251405	0.158703	-1.20385	-1.36822	-1.20385
YCR047C	BUD23	93.0675	90.2924	62.2953	1.01153	-0.278325	0.10589	-0.175042	-0.819058	-0.350137	1.14691	-0.470783	-0.129526	-0.458983	-1.61899	-0.741565	0.611321	0.167459	-0.335689	0.378191	0.00475005	0.145102	0.534227	0.296673	-0.289831	-0.010981	0.491443	0.0899507	-0.659317	-0.550583	-0.432416	0.653025	-0.417785	-0.180174	-0.181244	0.797867	0.535588	-1.0821	-0.740847	-1.0703	-1.2833	-1.11976	0.294581	0.156083	0.672687	0.206722	-0.378909	-0.542451	-0.378909
YCR047W-A
YCR048W	ARE1	183.899	121.013	85.8883	0.263592	-0.164491	-0.00260553	-0.346186	0.0565504	-0.139997	0.0981744	-0.321372	-0.262709	-0.753467	-0.18005	-0.421764	-0.209342	-0.0346084	-0.128831	-0.236901	-0.149869	-0.307685	-0.0932859	-0.217671	-0.49415	-0.674526	-0.235111	-0.566747	-0.792137	-1.14051	-0.828765	-0.605283	-0.533704	-0.719892	-0.555582	-0.319492	0.307517	-0.11203	-0.0533667	-0.544125	-0.0512186	-0.184863	0.34428	0.366841	0.32047	0.349077	-0.131497	0.00214806	-0.131497
YCR049C		260.038	160.563	90.986	0.329571	-0.284976	-0.326942	-0.373703	-1.17898	0.0523563	0.19069	-0.479513	-0.660844	-0.800815	-2.21046	-0.129033	-0.656755	1.35109	0.675653	1.01484	-0.0363579	-0.756403	-0.266695	-0.449352	-0.344152	-1.33211	-0.43589	-0.862551	-1.47849	-1.78001		-0.878855	-1.13272	-1.30495		-0.56242	0.847445	0.177242	-0.00408873	-0.14406	-2.88612	-1.14388	0.307794	0.575705		0.413199	-1.13979	-2.88203	-1.13979
YCR050C		349.489	287.828	247.222	1.42916		-0.897541	-0.634905	0.116166	0.30286	1.73251		-1.36128	-1.25026	-0.0820794	0.252196		2.03268	1.87031	1.42967	-0.31603	-0.205945		-0.693641	-0.71372	-0.525429		-1.17445	-0.313716	-0.859918		0.184143	-0.11616	-0.463179		0.381507					-1.95239	-1.17747	0.39769	0.319484		0.480811
YCR051W		432.802	258.447	286.038	-0.332032	-0.854276	0.553163	-0.862979	0.730606	2.03197	-0.736994	-1.22674	0.419517	-1.6427	0.927666	2.88363		0.227683	1.56548	0.538714	-0.328487	-0.975656		-0.451875	-0.730181	-1.65342		-0.865773													-0.637816	2.34492	0.401694	0.67776		0.413897
YCR052W	RSC6	81.5403	65.7636	41.8696	0.236946	0.0193307	0.558424	0.03183	-0.378944	-0.34049	0.0608123	-0.0801003	0.425975	-0.103022	-0.895723	-0.726884	0.269779	0.289837	0.0359145	-0.262756	0.0477842	-0.178475	-0.0495721	0.258367	-0.232964	-0.485173	-0.184498	0.041043	-0.661846	-0.391268	-0.391417	-0.401836	-0.419992	-0.0344194	-0.142522	-0.138834	-0.208967	-0.349879	0.156196	-0.372801	-0.931637	-0.464128	0.280748	0.306698	-0.0419761	0.217324	-0.620324	-1.08783	-0.620324
YCR053W	THR4	223.622	167.508	91.2858	0.613096	-0.207759	0.527715	0.359136	0.0256676	0.193934	0.588241	-0.378163	0.388279	0.460168	-0.230801	0.0864274	0.144848	0.423306	0.0593347	0.048986	1.18762	0.933926	0.896355	0.470063	1.27325	1.14501	0.910726	0.31133	-0.00507014	0.287121	-0.0807859	-0.00754268	0.153212	0.586228	0.150858	0.211292	0.443393	-0.523011	0.243432	0.31532	-0.290136	0.0374415	-0.0856299	-0.211089	0.759868	0.158733	-0.20599	-0.533567	-0.20599
YCR054C	CTR86	184.792	77.1642	46.6859	-0.310678	-0.923509	0.185453				-0.707051	-1.31761	-0.0318598								0.348595				0.164536						1.97538				2.09283								0.184059
YCR057C	PWP2	142.521	125.748	83.6008	0.34075	-0.740572	0.980438	0.595114			0.206363	-1.0775	0.944013	0.86621				-0.466855	-1.0763	-0.989123	0.438292	0.408372	0.5267	0.391557	0.283065	0.374832	0.482728	0.211096	-1.15387	-1.37961	0.858712	-0.309148	-0.849404	-0.938635	1.03818	-0.0565287							0.155227	0.0335395	-0.555452	0.180461
YCR059C	YIH1	227.626	162.342	97.1865	0.715057	0.278984	0.419385	-0.0479305	-0.819315	-0.446072	0.731208	0.260703	0.2553	-0.240264	-1.61941	-0.887564		1.38545	0.30804	1.01973	0.399276	-0.237106	0.241357	-0.352947	0.231507	-0.571095	0.152349	-0.739464	-0.0500191	0.161414	-0.451798		0.113983	0.471221	-0.19955						-1.92745	-1.9073	0.167768	0.333989	0.351898	0.386517
YCR060W	TAH1	249.076	216.541	228.427	-0.587352	1.80146	0.242558	-0.673809	-0.836076	0.0596798	-1.095	2.25901	0.038238	-1.3172	-1.64696	-0.117887	0.795497	1.92629	0.980509	1.68209	-0.344517	0.534425	-0.089922		-0.751364	0.559559	-0.231217		1.18008	0.436963	0.250046	0.896112	1.18755	0.723316	0.463317	1.01372	-1.89049	1.46351	-0.757259	-2.1127	-2.62746	-1.79998	0.406846	-0.0251342	-0.694533		-1.04272	-1.87021	-1.04272
YCR061W		33.6693	27.964	21.9975	0.741525	-1.02985	-1.01583	-0.667735	0.347502	0.309962	0.76832	-1.45718	-1.50648	-1.30675	0.298088	0.263003	-1.28873	-0.63042	-0.135083	-0.296162	-0.947525	-0.527776	-0.891915	-1.03773	-1.5482	-0.997062	-1.15979	-1.61377	-1.13615	-0.579773			-0.833939	-0.20688			2.05705	-0.168453	-0.217754	-0.0180218	0.433171	0.559165	0.600671	0.469286		0.576044	0.77692	0.650925	0.77692
YCR063W	BUD31	168.985	144.542	93.3953	0.869698	-0.823286	0.832566	0.382488	-0.616576	-0.117855	0.948042	-1.18606	0.762495	0.500348	-1.28624	-0.388068	1.41978	2.10595	0.55345	1.72176	0.891372	0.791581	0.401842	0.51383	0.881778	0.936413	0.338164	0.36721	1.23584	1.17157	1.28902	1.94189	1.23622	1.3954	1.44459	1.94236	-0.471739	-2.60584	-0.657287	-0.919433	-1.83969	-2.10983	0.00959352	-0.144832	-1.10643	0.14662	-1.45254	-1.1824	-1.45254
YCR064C		67.4934	53.6097	40.661	1.99408	-0.926437	0.571357	0.217453	0.0511509	-0.157035	2.52462	-1.32145	0.441851	0.216377	-0.188923	-0.447694	0.497902	1.43635	0.273474	1.06259	0.775267	0.969606	0.749631	0.903971	0.728354	1.1973	0.740845	0.86533	0.287995	0.0617603	0.142705	0.702762	0.408987	0.380049	0.361937	0.842032	2.02671	-1.81935	-0.0560511	-0.281525	-0.462396	-1.51029	0.0469131	-0.227697	0.378907	0.0386404	-1.45423	-0.406345	-1.45423
YCR065W	HCM1	87.8799	53.82	45.9672	0.66911	0.485253	0.814359	1.12539	0.911919	0.487717	0.666782	0.531439	0.740146	1.77864	1.22563	0.53352	0.623014	-0.0724482	-0.152689	-0.192859	1.25372	0.959329	1.14721	1.44129	1.3606	1.18224	1.20118	1.55136	-1.15666	-0.882192	0.0449975	0.0307684	-0.851841	-0.483557	0.269656	0.245312	0.0437678	-0.0915752	0.117132	1.15563	1.37832	0.726378	-0.106878	-0.222914	0.931524	-0.110072	0.609247	1.26119	0.609247
YCR066W	RAD18	58.4854	39.1453	20.9629	-0.240232	-0.422704	-0.749002	-0.268435	0.275445	-0.388564	-0.608274	-0.660286	-1.17894	-0.619682	0.179673	-0.800045	-0.867072	-0.914411	-1.00699	-1.37455	-0.628728	-0.34684	0.31206	-0.610639	-1.12693	-0.731906	0.234211	-1.06848	-0.906402	-0.980894	-0.615247	-1.61317	-0.633429	-0.573858	-0.353921	-1.21448	0.258799	0.206786	-0.311866	0.24739	1.18666	0.574501	0.4982	0.385066	0.588133	0.457838	0.886366	1.49853	0.886366
YCR067C	SED4	189.085	141.618	80.4415	-0.0914994	0.797886	0.495039	-0.0854176	0.150417	-0.106659	-0.399725	0.94178	0.348168	-0.304767	-0.0257922	-0.37103	-1.28154	0.286108	0.261584	0.0833751	0.308278	-0.0263372	0.0123939	0.287887	0.11126	-0.26222	-0.112752	0.0787337	-0.865163	-1.63128	-0.362828	-0.777301	-0.597437	-1.16888	-0.115522	-0.472242	0.881815	2.22332	1.62971	0.976773	-0.287376	-0.454405	0.197018	0.235882	0.00276948	0.209154	-2.08411	-1.91708	-2.08411
YCR068W	ATG15	112.151	77.1919	55.464	0.62838	0.178952	-0.331995	-0.232297	-0.0638598	-0.0273542	0.609672	0.129408	-0.667047	-0.5575	-0.377927	-0.25034	-0.112915	-0.112954	-0.127764	-0.481572	-0.231517	-0.768605	-0.477211	0.019238	-0.602042	-1.34999	-0.679632	-0.264269	-0.467088	-0.992382	-1.06362	-0.409322	-0.250016	-0.584368	-0.777394	-0.145482	0.722587	0.242323	-0.554132	-0.444584	-0.250162	0.231233	0.370525	0.581384	0.0977614	0.283507	0.785364	0.30397	0.785364
YCR069W	CPR4	236.905	151.426	124.978	0.0234195	2.12149	0.954252	-0.166196	0.282861	0.814752	-0.238589	2.67905	0.911869	-0.44376	0.19186	1.03122	0.213341	0.505046	0.75574	0.584627	0.0404848	0.124894	0.207426	0.303661	-0.24261	-0.0405949	0.113062	0.0988731	0.563222	0.309496	-0.0308315	0.170486	0.649192	0.606698	0.198038	0.36938	-0.45193	2.46571	0.698527	-0.657102	-0.56388	0.44659	0.283095	0.165489	-0.0849758	0.204788	-0.251937	-1.26241	-0.251937
YCR071C	IMG2	351.441	233.252	121.906	0.467693	-0.441902	0.336328	0.311227	0.309283	0.340232	0.38436	-0.685484	0.153344	0.377732	0.235282	0.30907	0.38778	1.32487	1.05295	0.689916	0.584734	0.611903	0.278722	0.0547735	0.476577	0.673101	0.195612	-0.218899	0.523043	-0.126207	-0.370565	0.266504	0.614126	0.208081	-0.122828	0.454642	-0.00341988	-1.07326	-0.234436	-0.010048	-0.817664	-0.380846	0.108156	-0.061198	0.31844	0.273672	-0.14641	-0.583229	-0.14641
YCR072C	RSA4	82.9492	90.6336	85.5181	0.531974	0.335655	0.506058	0.358466	-0.131014	-0.736482	0.474493	0.335085	0.361694	0.459015	-0.488284	-1.32952	0.461041	-0.0282913		-0.450656	0.640193	0.463872	0.661523	0.851079	0.549862	0.456166	0.63883	0.797799		-1.54575	-0.000785676	0.239873		-1.09063	0.226415	0.430994	0.013452	-0.125956	-0.0993474	-0.00202633		-0.878868	0.0903302	0.00770579	0.412415	0.0532794	-0.77952		-0.77952
YCR073C	SSK22				-0.0887973	-0.4491	-0.335147				-0.395936	-0.694932	-0.670916
YCR073W-A	SOL2	234.083	130.766	92.1727	0.973518	-0.504666	-0.396018	-0.433068	-0.157447	0.55378	1.09362	-0.767863	-0.745637	-0.902963	-0.531724	0.634057		0.799495	0.703996	0.573805	-0.424353			-0.282591	-0.856861			-0.649636	0.540719	-0.565489	-1.02902		0.629553	-0.193811	-0.744711						-1.23572	0.0602519	0.432508			0.367045
YCR075C	ERS1	187.495	111.178	59.3466	1.05677	0.561037	-1.1264	-0.866077	0.0307035	-0.32994	1.21035	0.630907	-1.64221	-1.64803	-0.222525	-0.710829	-0.622749	0.732061	0.755308	0.178615	-0.581491	-0.714994	-0.47324	-0.569293	-1.06451	-1.27142	-0.675034	-1.01569	-0.903843	-1.00079	-1.25657	-0.916887	-0.631196	-0.592058	-0.959629	-0.596192	1.83309	1.25366	-1.01946	-1.02528	-0.977833	-0.889444	0.483017	0.55643	0.284595	0.446395	0.130015	0.0416258	0.130015
YCR075W-A
YCR076C		191.082	87.052	41.7355	0.584636	0.132713	1.16519	-0.688026	-0.0826592	-0.157526	0.548335	0.0687173	1.1708	-1.34166	-0.408821	-0.448441	-0.297263	0.605492	0.71993	0.27034	-0.26888	-0.296065	-0.199871	-0.505797	-0.651413	-0.657497	-0.358519	-0.934618	0.500574	0.764953	-0.940459	-0.4161	0.594516	1.02339	-0.661073	-0.1515	0.845599	0.36598	1.46807	-1.0444	-1.12875	-0.71878	0.382534	0.361432	0.302554	0.428821	-2.18685	-2.59682	-2.18685
YCR077C	PAT1	149.992	96.7393	50.1894	0.112502	0.16808	0.494353	0.261502	0.061943	0.448131	-0.113679	0.115138	0.347326	0.292171	-0.171187	0.473275		0.18329	-0.0768018	-0.384636	0.519695	0.0868901	0.54251	0.375709	0.390633	-0.0962887	0.501034	0.190861	0.255541	-0.0679151	-0.0533768	-0.0307344	0.380662	0.261411	0.176744	0.190698					-0.0943856	0.857911	0.129062	0.183179	0.324289	0.184847
YCR079W		120.306	85.6319	68.5226	0.122599	0.271926	0.264152	-0.238378	0.346543	0.261937	-0.0995217	0.251439	0.0647452	-0.567964	0.296513	0.189916	0.284454	0.776751	0.277498	-0.0954863	0.463034	0.196081	0.0449184	0.38369	0.315759	0.0637274	-0.0750941	0.201052	0.08802	-0.287944	-0.323494	0.161009	0.234457	0.0601103	-0.078372	0.360964	-0.383975	-0.0330147	-0.219708	-0.852418	0.0190154	0.285403	0.147274	0.132354	0.00327791	0.182638	0.505111	0.238724	0.505111
YCR081C-A
YCR081W	SRB8	126.455	90.9423	64.4863	-0.169389	-0.252126	-0.915214	0.0247905	0.312691	-0.156091	-0.508941	-0.436397	-1.38297	-0.115134	0.240881	-0.446257		-1.88117	-0.631104	-0.823781		-0.818144	-0.382711			-1.42259	-0.570217		-1.62779		-0.69125	-1.81595	-1.26303		-0.425704	-1.39454					0.871985	0.377524		0.604443	-0.144513
YCR082W	AHC2	297.484	256.957	164.964	-0.931965	0.173371	1.44414	0.0654679	0.828658	1.03277	-1.57821	0.122083	1.51322	-0.0451415	1.0888	1.36301	0.235846	1.27331	0.945065	1.3467	0.870715	0.600501	0.377373	0.449629	0.854481	0.656391	0.309832	0.28524	0.280893	0.161551	0.583294	0.55653	0.402788	0.471346	0.778058	0.71218	-1.81405	-0.113763	1.27737	-0.280988	0.143736	0.0163022	0.0162333	-0.0558903	-0.468225	0.164388	-1.26107	-1.13364	-1.26107
YCR083W	TRX3	666.145	392.617	193.2	-1.32754	0.658202	0.913375	-0.23251	1.21675	0.557488	-2.13288	0.75844	0.86169	-0.557867	1.72658	0.6397	0.250224	1.48969	1.28162	1.82895	0.689011	0.468675	0.141761	0.570264	0.614373	0.463205	0.0370337	0.439263	0.853017	0.897572	0.0715853	0.161743	0.902112	1.14472	0.294767	0.361615	-2.3831	0.508216	0.611466	-0.808092	0.444958	-1.18925	0.0746383	0.00547028	-0.257733	0.131	-1.80071	-0.166508	-1.80071
YCR084C	TUP1	111.569	98.6343	68.1695	0.929776	0.83259	0.600841	0.55377	0.613958	0.014312	1.03228	0.98733	0.478043	0.79507	0.735972	-0.18693	0.393573	-0.074019	-0.159888	-0.474343	0.756673	0.559203	-0.0752693	0.716747	0.703783	0.59587	-0.214251	0.626289	-0.721635	-0.46246	-0.283806	-0.0716114	-0.472173	-0.0995511	-0.0408874	0.1544	0.638708	0.593757	0.0844701	0.401497	0.89586	0.287412	0.0528899	-0.0366675	-0.173364	0.0904583	0.202942	0.811389	0.202942
YCR085W		90.254	90.7998	33.836	-0.29594	0.769167		-0.892259	-0.876657	-0.40148	-0.686387	0.904085		-1.69308	-1.71365	-0.819702		0.365623	0.205479	-0.231715	-0.0601035	-0.118615	-0.0712093		-0.37553	-0.397449	-0.20955					-1.79648				-1.37725					-1.91912	-0.587987	0.315427	0.278835
YCR086W	CSM1	320.335	322.579	287.358	-0.209016	-0.372481	0.386586	-0.192021	-0.422916	-0.511649	-0.564505	-0.594366	0.215038	-0.488198	-0.967985	-0.987363	-0.133813	0.141217	-0.295436	0.322986	0.362634	-0.158303	0.0353061	-0.122405	0.183088	-0.455611	-0.0862235	-0.445115	-0.647742	-0.642765	-0.247512	0.101742	-0.407683	-0.264509	-0.00660954	0.308335	-0.430691	-0.460553	0.348852	-0.354384	-0.672548	-1.31035	0.179546	0.297308	-0.0796139	0.32271	-1.6592	-1.0214	-1.6592
YCR087C-A
YCR087W		66.7712	58.3264	39.9577	0.942192	0.517514	0.820158	0.538665	-0.428982	-0.860696	1.04969	0.573782	0.747264	0.76908	-0.977954	-1.51856	0.111478	0.253029	0.304278	0.518625	0.909087	0.681483	0.601583	0.660665	0.905187	0.775068	0.56943	0.554686	-1.16212	-1.13733	-1.2701	-0.191653	-0.856609	-0.716979	-0.972406	0.0478053	0.938214	0.462304	0.635786	0.657602	-1.28223	-2.03718	0.00389931	-0.093585	1.54184	0.10598	-2.67297	-1.91802	-2.67297
YCR088W	ABP1	222.231	102.831	43.6074	0.693668	-0.688912	0.369549	0.0570428	0.469409	0.369695	0.701217	-1.00969	0.194124	-0.0596384	0.498426	0.353908	1.28251	0.227599	0.375311	-0.10869	0.217216	0.306658	0.0848006	0.249204	-0.00907175	0.225774	-0.0289173	0.0293442	0.834927	0.332576	0.589819	0.513472	0.886324	0.627814	0.78422	0.673946	-0.581294	-2.2922	-1.08839	-1.34215	0.123115	0.462598	0.226288	0.0808839	-0.813137	0.21986	1.55099	1.2115	1.55099
YCR089W	FIG2	69.9894	48.7754	33.0995	-1.70702	-0.355352	-0.014487		0.294975	-0.451655	-2.66496	-0.571884	-0.277294		0.211767	-0.89606		-1.24629	-1.07885	-1.94002	0.339917	0.0317435	-0.0900543	-0.575189	0.153069	-0.177104	-0.23137	-1.02322			-1.15748	-1.96297			-0.866042	-1.5251					1.29062	1.04396	0.186848	0.208848	0.634672	0.448027
YCR090C		174.305	131.653	74.0999	-1.35608	-1.50873	-0.846598	0.00321926	-0.472882	-0.626976	-2.17288	-2.08573	-1.29874	-0.152252	-1.0501	-1.16287		0.78915	0.327341	-0.188241	0.446805	0.131761	-0.378416	0.403048	0.294314	-0.0305322	-0.565244	0.225768	0.480907	0.404633	-0.0767884	0.702378	0.577351	0.693738	0.154633	0.841691					-1.37744	-0.974631	0.152491	0.162293	-0.719877	0.177281
YCR091W	KIN82	193.187	101.666	92.8861	-0.872068	-1.23659	-0.965106	-0.660076	-0.0112258	0.527424	-1.49422	-1.72854	-1.44421	-1.29357	-0.29143	0.593948	-1.32337	-1.17144	-0.0394496	-0.915158	-0.785388	-1.08892	-0.945241	0.0421749	-1.33394	-1.8194	-1.22153	-0.234984	-1.73141	-2.08132	-1.66806	-1.58703	-1.35346	-1.58062	-1.34827	-1.19127	-0.170852	-0.405169	-0.120847	0.0297961	-0.251981	1.50911	0.548556	0.73048	0.126735	0.277159	1.62995	-0.131133	1.62995
YCR092C	MSH3
YCR093W	CDC39
YCR094W	CDC50	78.311	25.7972	24.8189	-0.0622996	-0.534798	-0.251797	0.485443	1.35594	1.31825	-0.358782	-0.807412	-0.568601	0.677501	1.95531	1.79746	-1.12529	-1.0992	-0.23702	-0.738323	-0.599921	-0.135237	-0.0464124	0.241996	-1.08886	-0.421808	-0.18084	0.0201408			-1.36796				-1.06483		0.766512	0.317882	0.556693	1.8028	2.19233	2.53578	0.488941	0.286572	0.88399	0.221855	1.97909	1.63564	1.97909
YCR095C		24.3445	5.32602	7.4163	0.108286	-0.514648	0.572483				-0.119591	-0.780966	0.443233					-0.753036	-0.0314503	-0.763642		0.27755				0.183117																		0.0944328
YCR095W-A
YCR096C	HMRA2	116.757	90.8968	64.2491	-0.227737	-0.448343	-0.356559	0.39276	-0.354207	-0.0784492	-0.590755	-0.693938	-0.6972	0.518023	-0.855071	-0.328099	-0.492389	0.192848	0.490003	0.10053	0.215499	0.419827	-0.158872	-0.832914	-0.0113404	0.39162	-0.31105	-1.35227	0.206278	-0.0879979		-0.652604	0.337667	0.243038		-0.361512	-0.098366	-0.201549	-0.204811	1.01041	-1.34507	-0.428629	0.22684	0.0282072		0.519357	-0.223818	-1.14026	-0.223818
YCR097W	HMRA1
YCR097W-A																		-0.194136	0.811517				-0.447564				-0.645306				0.743038				0.92893										-1.57424
YCR098C	GIT1	26.4669	16.8754	13.8436	-0.496014	-0.435504	-1.09899	-0.724708	-0.164498	-0.629705	-0.966926	-0.677086	-1.60856	-1.40478	-0.543311	-1.16702		-3.91773	-1.66245	-2.80974	-0.180206	-0.392423	-1.85143	-1.56558	-0.534238	-0.798706	-2.27075	-2.28771	-0.944558	-1.94924			-0.66673	-1.45978							1.11914	1.64272	0.354032	0.406283		0.722136
YCR099C		205.335	131.509	98.0669	-1.03322	-0.336811	-0.530445	-0.419757	-0.275809	-0.206896	-1.72018	-0.547548	-0.910651	-0.880059	-0.726236	-0.523575		0.404988	0.239497	-0.0253785	0.0490623	-0.425245	-0.754062		-0.231275	-0.846807	-1.00018		1.02037	0.802119	-0.381408	0.0330458	1.04817	1.05739	-0.133069	0.247334					-0.965733	-0.498196	0.280338	0.421561	-0.86711
YCR100C		140.01	93.6794	92.2198	1.06428	-0.427282	-0.576815		-0.319349	0.0890355	1.22088	-0.666295	-0.967573		-0.797787	-0.0732125	-0.905768	-0.0365484	-0.133291	-0.481854	0.11503	0.133689	-0.888363	-0.720175	-0.144104	-0.0277061	-1.15568	-1.20833	0.182833	-0.322041	-1.25463	-1.20848	0.317206	0.0289157	-0.957794	-0.855126	2.12665	0.239473	-0.0618045		-0.664496	0.408642	0.259134	0.161395	-0.197883	0.488154	0.470446	-0.602692	0.470446
YCR101C		72.109	49.8274	48.543	-0.986219	-0.61399	-0.16389	-0.427336	-0.822218	-0.190726	-1.65428	-0.911355	-0.460692	-0.893099	-1.62418	-0.498967	-0.826455	0.327953	-1.27871	-0.554047	-0.192906	-0.705471	-0.0142719		-0.55102	-1.25747	-0.143626		0.844441	0.290952	-0.502487	-0.824442	0.894627	0.589733	-0.247424	-0.514102	-0.827823	-0.0848998	0.365763	-0.0666444	-0.345468	0.0550808	0.358114	0.551997	0.103797		-0.310682	-0.711231	-0.310682
YCR102C				21.0756	-1.03035	-0.772609	-0.426797				-1.71615	-1.11955	-0.78342					-0.773773	-0.446776	-1.22357	-0.303207	-0.0269383	-0.907383		-0.696775	-0.263101	-1.1777				-1.87585				-1.54452								0.393568	0.236162	0.366819
YCR102W-A		105.911	68.5941			-0.719168	-0.543247					-1.0494	-0.926366					0.0985442		-0.25463
YCR104W	PAU3	67.7033	33.3106	25.4392	-0.47907	-0.0319328	-1.68603	-0.586545	-0.669779	-1.59168	-0.943166	-0.147385	-2.32918	-1.16705	-1.37367	-2.63101	-2.84888	-0.750171	-1.34797	-0.784117	-1.0263	-0.717166	-1.56992	-1.53398	-1.65229	-1.27461	-1.94481	-2.24737	-2.15734	-1.25589	-3.08082		-1.72519	-0.825447	-2.68257		1.90571	2.70149	0.5197	1.68183	-0.0257005	-1.84689	0.625992	0.557441	0.737765	0.71339	-2.36659	-0.5454	-2.36659
YCR105W	ADH7	52.0303	9.33295	5.05557	-1.66418	-0.728583		-0.286947	-0.777447	-0.3284	-2.6049	-1.06176		-0.651535	-1.55061	-0.708486		-1.017	-0.25662	-0.803863	-0.512403	-1.63513	-1.43642	-1.50391	-0.973213	-2.61985	-1.79023	-2.20898	-0.998782	-0.46949	-2.22471		-0.714054	-0.105983	-1.87401						-1.29399	0.0953767	0.46081	0.984723	0.0837755	0.705069
YCR106W	RDS1	79.5751	58.8999	45.7416	-1.06691	-0.22502	-0.289075	-0.160906	-0.793747	-0.592549	-1.76742	-0.400819	-0.614361	-0.434659	-1.57739	-1.11048		-1.37045	-2.07863	-1.69086	-0.447516	0.112416	-0.382373	-0.683231	-0.887469	-0.0588815	-0.569826	-1.16116	-1.59279	-0.935059	-1.37973	-1.44243	-1.23248	-0.531924	-1.07595	-1.06286					0.501239	0.580382	0.439953	0.171297	0.506124	0.477929
YCR107W	AAD3	249.425	179.839	121.596	-0.36502	-0.154615	-0.2673	-0.327589	-0.0870155	-0.39898	-0.78325	-0.30841	-0.587632	-0.721468	-0.41598	-0.815897		-0.999077	-0.76451	-1.00571	-0.0749761		-0.861397	-0.345831	-0.395183		-1.12445	-0.730379	-1.87125	-0.237171	-1.49797		-1.4755	0.106562	-1.18762						0.34853	0.189816	0.320207		0.0631669	0.384548
YCR108C
YDL001W	RMD1	72.8951	56.174	35.562	0.145439	0.363998	-0.111668	-0.474934	0.286497	-0.548075	-0.0674965	0.372287	-0.396587	-0.975001	0.197835	-1.0428	-0.755092	-0.637111	-0.452805	-0.597068	-0.0428017	-0.327892	-0.0935529	-0.155311	-0.352667	-0.704138	-0.235421	-0.487129	-0.93214	-1.03685	-0.38712	-0.715783	-0.655892	-0.625051	-0.138464	-0.417614	0.687596	1.12738	0.358505	-0.219909	0.65064	-0.445729	0.309866	0.376246	-0.0969569	0.331817	-0.804235	0.292135	-0.804235
YDL002C	NHP10	120.659	79.5872	54.7088	-0.472136	-0.712185	0.0163741	0.586913	-0.324194	0.374981	-0.933444	-1.04024	-0.239411	0.852099	-0.805749	0.361952	1.3014	-0.344024	-0.273285	0.39282	0.48017	0.476994	-0.551581	0.127886	0.338403	0.475396	-0.765741	-0.125551	1.49401	1.52558	0.457541	1.32507	1.46154	1.71927	0.659289	1.39464	-2.23485	-2.34164	-1.54081	-0.449304	-0.532464	-0.0308677	0.141767	0.00159812	-1.42503	0.253437	1.50995	1.00835	1.50995
YDL003W	MCD1	50.2051	37.8907	19.4472	-0.173755	0.225909	0.232184	0.306422	0.453383		-0.515062	0.191041	0.0255038	0.369464	0.472089		0.369043	-1.05203	0.131752	-1.24239	0.218231	-0.0232117	0.998391	0.392217	-0.00773038	-0.257639	1.02887	0.211938			0.348806	-0.74505			0.556591	-0.443603	-0.884105	-0.178002	-0.343539	0.000420796	0.340337		0.225962	0.234428	0.472276	0.180278		0.683876
YDL004W	ATP16	274.552	215.02	124.05	0.43023	-0.655856	0.62291	-0.164303	0.537699	1.57109	0.331831	-0.966306	0.505135	-0.440504	0.61065	2.18225	-0.767571	1.43707	1.93189	1.74611	0.425712	0.15238	-0.34981	0.208471	0.266441	-0.000315435	-0.532123	-0.0226631	-0.288514	-1.13787		-0.901978	-0.0941643	-0.717476		-0.582953	1.0994	-0.198735	1.27271	0.327067	-1.32125	0.436141	0.159271	0.152695		0.231134	-0.836564	-2.59395	-0.836564
YDL005C	MED2	39.2384	33.4157	21.1009	0.600996	-0.320089	-0.0216204	0.25625	0.385369	-0.0615339	0.571274	-0.5256	-0.286051	0.283133	0.360318	-0.302356	-0.72113	-1.36412	-0.994325	-1.06314	0.078501	0.094065	0.222771	-0.0352774	-0.192374	-0.085774	0.13083	-0.333873	-1.50831	-1.74891	-0.950303	-0.940624	-1.15875	-1.2765	-0.67037	-0.61727	1.2924	0.19553	0.435079	1.00426	1.35464	0.760781	0.270875	0.179839	0.8012	0.298596	0.325702	0.919564	0.325702
YDL006W	PTC1	115.653	66.0638	31.7655	-0.649117	0.873704	0.96539	0.077052	0.480686	0.31603	-1.1816	1.04129	0.925541	-0.025209	0.516958	0.272238	0.101216	-0.677024	-0.706534	-0.312456	0.147867	0.258496	0.513404	0.092372	-0.100712	0.155195	0.467333	-0.170894	-1.03847	-0.896551	-0.28409	-0.251058	-0.74869	-0.496694	-0.0411562	-0.00494573	-1.28282	0.940077	0.824325	-0.126425	1.22349	0.584694	0.248579	0.103302	0.508489	0.263266	-0.239631	0.399167	-0.239631
YDL007C-A
YDL007W	RPT2	226.572	187.739	125.564	1.05313	0.541584	0.534387	0.19791	0.118507	0.506281	1.20524	0.605375	0.396469	0.182749	-0.0782327	0.561771	0.197267	0.0352504	0.0575378	0.319291	0.184743	0.47707	0.760006	0.958515	-0.0519833	0.475508	0.752857	0.934971	0.924549	0.693543	0.738692	0.918268	0.964542	0.958057	0.924825	1.0334	1.00797	0.408108	0.199202	-0.014518	-0.13577	0.24248	0.236726	0.00156243	-0.171968	0.0235441	0.0432779	-0.334973	0.0432779
YDL008W	APC11	308.849	262.419	148.478	0.241798	0.297182	0.379678	0.249364	-0.123547	-0.366757	0.0676159	0.284588	0.206558	0.271286	-0.476013	-0.766859	0.443911	1.74528	1.09002	1.26292	0.38036	0.225996	-0.415389	0.401704	0.206511	0.107567	-0.608052	0.224051	1.00028	0.637193	-0.06146	0.679405	1.03064	0.906503	0.16911	0.821291	-0.376295	-0.159323	-0.237353	-0.172625	-1.56604	-2.02978	0.173849	0.118429	-0.777163	0.177653	-1.79243	-1.32868	-1.79243
YDL009C		208.459	97.4796	63.3688	0.170301	-0.258782	-0.0207256		-0.0194275		-0.0326356	-0.445132	-0.284952		-0.304908			0.252235	0.0809666	1.22889			0.155776				0.0532601		-0.140894	-0.829417	-0.539423	-0.956621	0.0346719	-0.435274	-0.282309	-0.631475					-0.385875				0.335569
YDL010W		312.85	197.63	95.3049	0.00122168	-0.314065	-0.242932	0.452552	0.105026	-0.239567	-0.269714	-0.517693	-0.557719	0.620907	-0.100386	-0.573295	-0.466285	0.638177	0.408819	0.802973	-0.105008	-0.103869	0.047101		-0.434868	-0.37584	-0.072567		0.962875	-0.290294	-0.447758	-0.790277	0.997991	0.0579605	-0.195734	-0.483764	0.196571	-0.0514084	-0.091434	1.08719	-0.509205	-1.37627	0.32986	0.271971	0.123167		-1.28483	-0.417771	-1.28483
YDL011C		245.642	110.304	86.5655	0.383057	0.171214	-0.248022	-0.00536239	-0.130974	-0.141014	0.265686	0.119252	-0.563967	-0.167018	-0.48822	-0.423313	0.328558	1.90697	1.60897	1.59932	-0.160014	-0.411997	0.2162	-0.238495	-0.507556	-0.827391	0.123221	-0.593335	1.35382	-0.261347	0.282502	-0.216182	1.33919	0.084444	0.49397	0.0260238	-0.0628715	-0.209306	-0.892525	-0.495576	-2.09719	-2.02263	0.347541	0.415394	-0.370749	0.35484	-1.13011	-1.20467	-1.13011
YDL012C		473.877	256.715	156.58	0.0860911	1.10748	0.927139	0.306688	0.561154	0.42537	-0.150712	1.34813	0.878587	0.369922	0.649195	0.438638	0.457325	1.58455	1.67824	2.06319	0.633103	0.658099	0.713868	0.322166	0.540494	0.740799	0.699437	0.1225	1.21664	0.463362	0.309061	-0.000342128	1.21946	0.747468	0.519054	0.217686	-0.608037	0.890803	0.421263	-0.087403	-1.02904	-1.62455	0.092609	-0.0827005	0.180383	0.199666	-2.04581	-1.45031	-2.04581
YDL013W	HEX3	154.272	99.6701	72.3766	-0.458636	-0.269217	0.0817543	-0.418117	-0.15388	-0.3014	-0.914515	-0.458829	-0.159154	-0.877237	-0.525862	-0.667395	0.298301	-0.662978	-0.761168	-0.457402	-0.235181	-0.17116	-0.377723	-0.260566	-0.606884	-0.474452	-0.564442	-0.621515	0.408237	-0.109596	-0.191201	0.223863	0.513928	0.223278	0.0465747	0.416777	-1.21282	-0.75713	-0.457456	-1.17554	0.235306	-0.209993	0.371702	0.303293	-0.611016	0.360949	0.247462	0.692762	0.247462
YDL014W	NOP1	107.365	109.294	56.4237	0.815305	1.38022	1.66228	1.12551	-0.0667138	-0.27573	0.871774	1.70611	1.781	1.77885	-0.382617	-0.62833	0.0600788	0.658717	0.0962287	0.550699	1.86042	1.69341	1.99319	1.19939	2.1623	2.25802	2.18068	1.24251		-0.800264	-0.00828729	-0.253033		-0.408603	0.21933	-0.00669912	0.811695	1.64603	1.72092	1.71877	-0.478845	-1.17903	-0.301887	-0.564606	1.96135	-0.0431218	-2.89995	-2.19977	-2.89995
YDL015C	TSC13	337.117	267.961	183.999	0.683959	-0.380985	0.274906	0.210856	0.380568	0.719101	0.687603	-0.605528	0.0779469	0.205025	0.352428	0.88565	-0.159604	0.170683	0.396912	0.207653	0.275206	0.523031	0.538574	0.547797	0.0675582	0.542862	0.496476	0.410578	-0.687015	-0.964729	-0.578464	-1.08865	-0.441958	-0.559069	-0.319182	-0.748717	0.847207	-0.445924	0.237551	0.364629	-0.0444845	0.677997	0.207648	-0.019831	0.815658	0.137219	0.440446	-0.282035	0.440446
YDL016C		410.639	288.681	172.552	0.0901329	0.462245	0.529297	0.900451	1.23964	0.382107	-0.145045	0.50124	0.390221	1.3916	1.76419	0.372797	-0.203629	0.986445	1.28152	1.35048	0.942522	0.829008			0.94937	0.991262			-0.331661	-0.306131			-0.131821	0.0434717			0.0585837	0.704868	0.59385	1.59523	0.482669	-0.977685	-0.00684775	-0.162253			-1.57153	-0.111181	-1.57153
YDL017W	CDC7																						-0.496099				-0.701501				-1.31268				-1.01262										0.311119
YDL018C	ERP3	72.5747	55.2829	44.4908	-0.386637	0.661088	-0.0480408	-0.623517	-0.489835	0.105903	-0.813559	0.762227	-0.318483	-1.23066	-1.07796	-0.0475423	-1.39056	-0.159685	-0.00253526	-0.723048	-0.239567	-0.673603	-0.590845		-0.612679	-1.21077	-0.811201		-1.47969	-1.97625			-1.13377	-1.48449			0.577001	2.15279	1.07208	0.159895	-1.07542	0.675505	0.373112	0.537164			-0.396572	-2.1475	-0.396572
YDL019C	OSH2	209.341	153.128	115.412	0.248866	-1.10433	-0.0323574	-0.320104	0.540046	0.0339358	0.0775272	-1.55494	-0.29923	-0.708588	0.614507	-0.157066	-0.182065	-0.677429	-0.253457	-0.450249	-0.654449	-0.496569	-0.508544	-0.533651	-1.16092	-0.951329	-0.71591	-0.970181	-0.31648	-0.567739	-0.527483	0.0707178	-0.118572	-0.195869	-0.271032	0.280786	0.259592	-1.37287	-0.117165	-0.526523	0.867964	0.293184	0.506468	0.45476	-0.444878	0.43653	0.410349	0.985129	0.410349
YDL020C	RPN4	1165.39	620.686	465.117	0.802825	0.732703	1.51814	1.29561	1.26645	1.41997	0.854274	0.856225	1.60406	2.07155	1.80825	1.95227	2.41993	0.651408	0.27337	0.89172	1.29424	1.44569	1.40621	1.48659	1.41414	1.89499	1.50105	1.6092	1.09661	1.15953	1.42413	1.13287	1.11471	1.38438	1.57219	1.22397	-1.56566	-1.56371	-0.81587	-0.348382	1.53488	1.06055	-0.1199	-0.449299	-0.0711412	-0.12261	1.87642	2.35075	1.87642
YDL021W	GPM2	292.999	146.767	83.3778	-0.0116726	-0.62082	-0.484345	-0.0367786	0.501328	1.39002	-0.287794	-0.92032	-0.854062	-0.221075	0.550879	1.90668	-0.831531	-0.463347	0.965467	0.785856	0.321434	0.369533	-0.0858789	-0.197888	0.128645	0.317916	-0.226535	-0.54149	-0.732728	-0.857738	-1.63536	-1.17768	-0.481854	-0.461185	-1.31738	-0.827774	0.543737	-0.0887894	-0.0225308	0.610456	-0.414588	1.12083	0.192789	0.0516175	1.09085	0.343601	1.14336	-0.392057	1.14336
YDL022C-A
YDL022W	GPD1	1452.34	801.606	462.862	1.22054	1.20987	1.0961	0.335131	1.60104	1.888	1.43999	1.48253	1.086	0.418862	2.3581	2.66454	2.07728	1.72925	2.25131	1.25082	0.465648	0.747538	0.233343	0.645526	0.319214	0.871869	0.14307	0.535356	1.61757	0.691133	1.01673	1.86424	1.56938	0.955852	1.18743	1.87341	-0.637294	-0.594757	-0.991289	-1.65842	0.106792	1.41371	0.146434	-0.124331	-1.04436	0.11017	2.405	1.09808	2.405
YDL023C		1022.12	473.022	394.992	1.07978	0.592144	-0.197333	0.448027	0.774559	2.13589	1.24262	0.671736	-0.501744	0.613121	0.999896	3.04178	1.76357	3.39767	3.29286	2.22426	0.128689	0.267013	-0.766455	0.486367	-0.126054	0.167675	-1.01453	0.332147	1.45553	-0.256242	0.749911		1.42796	0.0891145	0.935421		-0.520955	-1.09183	-2.26531	-1.15045	-2.29297	0.817521	0.254743	0.0993375	-1.94995	0.15422	3.08284	-0.0276545	3.08284
YDL024C	DIA3	42.5494	25.1329	17.1189	-0.401508	-1.52829	-1.13225	-0.387052	-0.0325606	-0.750071	-0.834411	-2.11141	-1.64939	-0.823783	-0.326491	-1.3502	-2.42006	-1.53678	-2.87727	-1.23607	-1.15443	-1.54713	-1.46133	-1.04996	-1.8216	-2.4909	-1.81908	-1.62939	-3.39371	-2.9577		-3.46485	-2.80424	-2.38241		-2.85875	1.58564	0.308649	0.770664	1.59627	2.55078	-0.114135	0.667176	0.943764		0.579429	-0.884799	1.78012	-0.884799
YDL025C		184.153	111.16	69.9559	0.664162	-0.188441	-0.171347	-0.364244	0.333994	0.147503	0.659844	-0.352808	-0.469845	-0.784538	0.275891	0.0157658	-0.492538	-0.470687	-0.218728	-0.394637	-0.302328	-0.258255	-0.154672	-0.101683	-0.695614	-0.602087	-0.306186	-0.418658	-0.609798	-0.884581	-0.840453	-0.938041	-0.374567	-0.485743	-0.566621	-0.614977	1.15238	0.13973	0.0226925	-0.292	0.494618	0.410403	0.393285	0.343832	0.260435	0.316975	0.38771	0.471926	0.38771
YDL025W-A
YDL026W		217.063	118.671	61.6232	-0.0987122	-0.50795	0.0837202	0.0376094	0.324132	0.992269	-0.409839	-0.772175	-0.156741	-0.0930772	0.259684	1.30137		1.41028	1.54387	0.564223	0.0457919	0.0362592	-0.123159		-0.235597	-0.170487	-0.2697			-1.12408	-0.397934			-0.70486	-0.148678						-1.28419	0.737147	0.281389	0.206746	-0.121022
YDL027C		191.901	101.608	60.179	0.422635	-0.0622974	0.296154	-0.0923373	0.644595	0.807814	0.321181	-0.18724	0.104029	-0.316674	0.786319	1.02066	-0.705927	-0.0163336	0.142814	-0.218587	-0.45986	-0.471161	-0.864865	-0.1199	-0.903781	-0.914094	-1.12847	-0.441917	-1.46759	-1.3733	-0.971148	-1.61743	-1.12321	-0.932863	-0.690057	-1.21826	1.02711	0.518687	0.809956	0.389253	0.643505	1.23925	0.443921	0.442933	-0.438412	0.322017	0.429289	-0.166451	0.429289
YDL028C	MPS1	95.4151	59.0288	30.5653	0.280884	-0.204178	-0.431349	0.111033	0.757037	0.197756	0.122422	-0.373463	-0.789007	0.0332619	0.971101	0.0922438	-0.182467	-1.15482	-0.918445	-1.52832	-0.410162	-0.197844	0.0727999	0.177817	-0.838108	-0.513557	-0.042812	-0.0618001	-1.64632	-2.05751	-0.719173	-1.10326	-1.27919	-1.55884	-0.452076	-0.761692	0.304888	-0.190996	-0.606541	0.215729	1.88955	1.62056	0.427946	0.315713	0.409264	0.239618	2.2271	2.49609	2.2271
YDL029W	ARP2	273.832	186.165	79.7219	-0.0285978	0.539889	0.513965			0.857697	-0.311526	0.60315	0.3714			1.09657	0.0526949	0.614701	0.708616	0.264722	0.399168	0.498615	0.672996	0.261831	0.231365	0.507081	0.652114	0.0454653	-0.638791	-0.650856	-0.481748	-0.933352	-0.39987	-0.271911	-0.227837	-0.610812	-0.364221	0.550455	0.318706			0.831851	0.167803	-0.00846587	0.879951	0.216365	0.513146		0.513146
YDL030W	PRP9																						-0.560394				-0.775945
YDL031W	DBP10	81.0209	65.6687	52.3161	-0.564463	-1.39207	0.132935		-0.205403	-0.430777	-1.0629	-1.93261	-0.0963286		-0.610532	-0.864288		-0.890042	-0.856209	-0.255908	-0.270671	0.215017	-0.333557	-0.262028	-0.653781	0.0914771	-0.513305	-0.623381	0.0652294	-0.32064	0.635703	0.104255	0.214567	0.0301973	0.827556	0.310567					0.245677	-0.60838	0.38311	0.12354	-1.34086	0.361353
YDL032W		125.801	88.7564	65.7817	-0.339842	-0.418108	-0.186283	0.327792	-0.195455	0.00315012	-0.747945	-0.654253	-0.488179	0.406235	-0.594185	-0.203917		1.62957	1.14779	0.695591	0.211789	0.409288	0.0127897	-0.176263	-0.0162437	0.376176	-0.112294	-0.513879			-0.628363				-0.36631						-1.74198	-0.899508	0.228032	0.0331127	0.254016	0.337616
YDL033C	SLM3	311.985	219.091	128.533	0.442138	0.418025	1.04315	0.171924	0.104908	0.421745	0.348528	0.4432	1.02099	0.138036	-0.100581	0.43312	1.92881	1.08224	0.28792	0.653001	0.80037	0.532453	0.9057	0.747388	0.761526	0.556669	0.921546	0.665411	0.519378	0.508467	1.09579	1.3367	0.610927	0.788734	1.26209	1.40496	-1.58028	-1.48561	-0.907819	-1.79077	-0.388502	-0.219881	0.0388441	-0.0242163	-0.340542	0.0819776	0.687938	0.519317	0.687938
YDL034W		210.735	143.614	89.1764	-1.66125	0.592848	1.23039	-0.301414	-0.568516	0.366144	-2.60079	0.672661	1.25084	-0.676428	-1.20726	0.348504	-0.363618	1.03689	0.547823	0.621997	0.0354203	0.0714872	0.0903675	1.30848	-0.249302	-0.118861	-0.0224717	1.38179	-0.230013	-0.451006	-0.410558	-0.784622	-0.0431077	-0.0890725	-0.1606	-0.478743	-2.23717	1.03628	1.61446	-0.312809	-1.75508	-0.273493	0.284723	0.190348	0.138129	-0.0733148	-1.88795	-3.36954	-1.88795
YDL035C	GPR1	97.7823	65.0597	51.4615	-0.53314	-0.664605	0.175092	0.125213	0.449267	0.139035	-1.01898	-0.977789	-0.0445787	0.0576609	0.465326	0.00287858	0.150072	-1.35997	-1.42232	-1.58013	0.00434494	0.187337	-0.0167056	0.290475	-0.290366	0.0509137	-0.146444	0.0820379	-0.616892	-0.932517	-0.281791	-0.550292	-0.380758	-0.529599	-0.0389847	-0.270661	-1.16905	-1.12786	-0.19465	-0.0924107	1.88765	1.58301	0.294711	0.136424	-0.10746	0.208437	1.77766	2.0823	1.77766
YDL036C	PUS9	173.168	123.435	60.6542	0.344324	-0.389671	-0.106235	0.137986	0.281924	-0.711367	0.211375	-0.616929	-0.389918	0.0796397	0.19032	-1.2913		-0.443792	-1.30512	-0.624887	0.359978	0.363253	0.110278	0.229386	0.179578	0.308712	0.000581099	0.00404154	0.174505	-0.295433	0.759618	-0.648895	0.309937	0.0532592	0.944589	-0.358219					1.49544	-0.666415	0.1804	0.0545408	-0.944008	0.225345
YDL037C	BSC1	387.061	264.896	206.39	-0.962297	-0.91756	-0.464596	-0.457617	-0.194983	-1.78749	-1.62074	-1.3098	-0.829819	-0.945204	-0.593409	-2.929	1.95081	0.7352	-0.814299	0.436171	0.221521	-0.990488	0.164092	-1.01886	-0.00338336	-1.67515	0.0628888	-1.58968	1.40351	-0.0360917	1.8117	-2.64019	1.38256	0.290526	1.93824	-2.12646	-3.57155	-3.26061	-2.78063	-2.89601	0.22089	-3.36517	0.224904	0.684663	-1.87535	0.570822	-0.584539	3.00152	-0.584539
YDL038C		146.978		123.913														-0.718761	-0.0787945		-0.625877				-1.12316																		0.497284
YDL039C	PRM7	768.661	671.94	361.373	-1.22646	1.19735	0.5773	-1.22499	-0.166654	-1.01426	-1.99113	1.46609	0.449146	-2.26561	-0.546855	-1.75225		0.661255	0.415001	1.8732	0.308339	-0.021003	0.277494	-0.477321	0.111341	-0.254402	0.194189	-0.898261	2.50353	1.17173		-0.596493	2.34261	1.39554		-0.311687					-0.961856	-3.62545	0.196998	0.2334		0.42094
YDL040C	NAT1	131.29	103.85	56.9849	0.52519	-0.104929	-0.58499	-0.0240756	0.142092	-0.109318	0.464981	-0.243195	-0.977608	-0.199217	-0.0394744	-0.375076	0.323653	-0.587919	-0.821951	-0.648393	0.269553	0.233369	0.364485	-0.0950627	0.0600875	0.118371	0.294911	-0.410205	-0.074004	-0.176364	-0.0811846	-0.0212185	0.0930501	0.162193	0.150481	0.199148	0.141328	-0.566848	-1.30126	-0.522871	0.782476	0.273317	0.209465	0.114998	0.14443	0.315142	1.57458	2.08374	1.57458
YDL041W		54.0434	29.8268	16.8365	-0.0251121	-0.855641	-0.42093	-0.782451	-0.97981	-1.37901	-0.306639	-1.22853	-0.776217	-1.50414	-1.88316	-2.30735		-0.528399	-1.27537	-0.0969282	-0.87757	-0.664817	-0.389686		-1.45576	-1.19789	-0.578293		-1.40176	-1.92804	-0.87498	-0.824297	-1.06575	-1.44039	-0.59923	-0.513974					-0.60779	-2.21042	0.578186	0.533074	0.0209376
YDL042C	SIR2	89.6124	55.4881	27.2708	0.181938	0.135948	-0.141572	-0.106932	-0.287739	-0.827372	-0.0163176	0.0729644	-0.433296	-0.341786	-0.745841	-1.46784	-0.6942	-1.25783	-1.86075	-0.988064	-0.671686	-0.552671	-0.124472	-0.84068	-1.18369	-1.03355	-0.27122	-1.36219	-1.74503	-2.28465	-0.482506	-1.1355	-1.36534	-1.76664	-0.228553	-0.790315	0.677883	0.767164	0.260905	0.352414	1.11491	-0.47978	0.512008	0.480874	-0.0426668	0.521507	-0.740685	0.854009	-0.740685
YDL043C	PRP11	56.2291	37.3716	21.4859	-0.577377	0.356788	1.70555	0.202524	-0.711667	-0.631832	-1.08101	0.362824	1.83412	0.190688	-1.44251	-1.17026	-0.735075	-0.883178	-0.885196	-0.95617	-0.256868	0.0110691	-0.451998	-0.429222	-0.635541	-0.207402	-0.650439	-0.836849	-0.905624	-1.22269	-0.584863	-0.550394	-0.63275	-0.795069	-0.325225	-0.270752	-0.345936	1.0979	2.56919	0.925763	-0.557312	-0.214092	0.378673	0.218471	-0.325214	0.407628	-2.78329	-3.12651	-2.78329
YDL044C	MTF2	90.2428	56.0519	34.5215	0.37955	-0.853418	0.329392	0.0493645	-0.216558	-0.144687	0.260769	-1.22561	0.144831	-0.0728503	-0.628865	-0.428903	0.257176	-0.825313	-1.40426	-0.710489	-0.58082	-0.0701973	-0.233612	-1.0834	-1.06362	-0.326495	-0.397586	-1.67209	0.117962	0.136881	-0.163743	-0.183841	0.260589	0.448776	0.0725075	0.0547417	0.00359218	-1.48279	-0.112346	-0.330027	0.775399	0.281587	0.482801	0.256298	-0.470093	0.588684	0.393933	0.887745	0.393933
YDL045C	FAD1	140.555	105.42	70.4019	-1.23435	0.0220239	0.126424	0.166548	0.131558	-0.0512122	-2.0022	-0.0765654	-0.104321	0.128785	-0.0567848	-0.286648	-0.41288	0.0127734	0.0805643	-0.00133286	-0.0553746	0.122257	-0.384242	-0.40063	-0.369282	-0.0444596	-0.57199	-0.800345	-0.275206	-0.411737	-0.718105	-0.290032	-0.0825496	-0.0531457	-0.451068	-0.039554	-1.58932	0.336315	0.30856	0.541665	-0.137349	-0.285315	0.313907	0.166717	-0.120922	0.399714	-0.593875	-0.445909	-0.593875
YDL045W-A	MRP10	554.591	313.362	168.394	0.0423873	-0.188722	0.92547	-0.274714	1.23924		-0.211993	-0.353176	0.876538	-0.630486	1.76354		-0.0407217	1.92909	2.27584	1.70534	0.685992	1.04913		0.910228	0.610383	1.31385		0.87332	0.00853379	0.0352712		-0.0064941	0.165085	0.355815		0.212223	-0.171271	-0.312455	0.91726	-0.589764	-0.5123		0.075609	-0.264715		0.0369085		-1.42956
YDL046W	NPC2	405.019	311.236	229.167	0.978604	1.89686	1.35843	0.712677	0.925658	1.29003	1.10075	2.38423	1.40801	1.0685	1.24821	1.75451	0.53629	1.37699	1.68607	1.46833	0.901168	0.796507	1.15355	0.949075	0.894723	0.943632	1.20851	0.922919	0.344929	-0.0489811	0.404558	0.508725	0.458676	0.278734	0.609248	0.66973	0.564458	1.84794	0.871724	0.532209	-0.437868	0.286179	0.00644482	-0.147125	0.599265	0.0261568	-0.585545	-1.30959	-0.585545
YDL047W	SIT4	459.53	298.551	216.482	1.45072	0.984595	0.176469	-0.0568706	0.197229	0.11623	1.76273	1.18684	-0.0428886	-0.255647	0.0511356	-0.0318268	1.5022	1.07407	0.925507	1.27541	0.622654	0.429001	0.608076	0.677326	0.526687	0.405064	0.576948	0.575958	2.27402	1.82473	0.77555	1.72203	2.1423	1.99296	0.959637	1.74713	0.260534	-0.315358	-1.54509	-1.75785	-0.874371	-1.30724	0.0959675	0.023937	-0.382689	0.101369	0.23785	0.670717	0.23785
YDL048C	STP4																	-2.74566
YDL049C	KNH1	275.872	159.579	72.878	-0.193347	1.32136	0.0600728	-0.516354	-0.1699	-0.0283527	-0.542533	1.62885	-0.185769	-1.04627	-0.55219	-0.251859	-0.566049	0.107174	0.579731	1.01863	0.870077	0.268914	0.297666	-0.554165	0.853639	0.170461	0.217545	-0.996373	0.1165	0.29816	-0.163682	-0.597121	0.259313	0.596328	0.0725647	-0.312244	0.0235166	2.1949	0.38028	-0.480222	-1.13192	-1.27049	0.0164381	0.0984527	0.14498	0.442208	-1.65077	-1.5122	-1.65077
YDL050C		152.76	91.8715	65.4769	0.988168	0.71615	1.32613		-0.0786964	-0.724291	1.11416	0.834498	1.36836		-0.402309	-1.31097		0.52088	0.52672	1.12748	0.856017	1.47643			0.83506	1.94004			-0.920891	-1.27426		0.284274	-0.646074	-0.842252		0.470422					-0.929029	-2.43845	0.0209575	-0.463608
YDL051W	LHP1	147.726	103.796	59.2242	0.465111	0.500186	1.23668	1.21857	0.179028	-0.330613	0.38074	0.551038	1.25856	1.93898	0.0212257	-0.711854		0.2598	0.0849784	0.856765	0.819019	1.12049	1.88701	0.866005	0.786169	1.41842	2.05774	0.816856	-1.18547	-0.969557	0.791118	0.424063	-0.87699	-0.563486	0.97434	0.594552					-0.0637527	-1.56862	0.0328499	-0.297928	1.0834	0.0491482
YDL052C	SLC1	140.441	91.0926	58.58	1.07252	0.54912	1.45784	0.308344	0.162126	0.961987	1.23244	0.615266	1.53004	0.372772	-0.00655085	1.25529		0.358455	0.489694	0.638973	0.73608	0.377021	0.941566	0.7328	0.676571	0.328889	0.963073	0.646784	-1.03472	-0.997716	-0.798624	-0.951548	-0.745421	-0.589248	-0.527115	-0.62697					-0.496245	0.616312	0.0595089	0.0481321	1.49019	0.0860154
YDL053C	PBP4	84.7015	57.2794	20.7095	0.698293	0.401397	-0.0347866	0.204667	-0.29943	0.45739	0.707702	0.421375	-0.302213	0.194375	-0.765054	0.487367	0.00430746	0.861737	0.386412	0.940353	0.137525	0.343293	-0.455761	0.477088	-0.114378	0.279462	-0.654797	0.3203	0.0790958	-0.0905912		0.093507	0.226669	0.240665		0.301023	0.703394	0.417068	-0.30652	0.190067	-1.15147	-0.452985	0.251903	0.0638313		0.156788	-0.146465	-0.844946	-0.146465
YDL054C	MCH1	60.6106	33.7678	22.6466	-0.766767	-1.05617	-0.5982		0.383634	-0.0645992	-1.34657	-1.49173	-0.993823		0.357466	-0.307021		-0.620176	-0.256408	-0.843431	-1.73585	-1.0012	-1.56379	-0.593785	-2.58991	-1.69085	-1.93771	-1.04696													0.613875	0.53641	0.854063	0.689651		0.453174
YDL055C	PSA1	307.917	163.042	72.9152	1.43037	2.24952	2.45967	1.44515	1.86041	1.50776	1.7342	2.8471	2.75982	2.32884	2.78434	2.08587	2.74576	1.37078	1.34061	2.09239	2.35116	1.586	2.11202	2.11788	2.81078	2.10061	2.31826	2.41521	1.80885	1.66044	2.29574	2.44755	1.73632	1.84266	2.3954	2.39138	-1.01156	0.101334	0.0140565	-0.416919	1.44373	-0.0065263	-0.459627	-0.51461	-0.0771386	-0.297332	-0.0205828	1.42968	-0.0205828
YDL056W	MBP1	73.5514	55.4551	30.9151	-0.0519884	0.163804	-0.214642	-0.349283	0.278261	0.183128	-0.344324	0.109525	-0.522991	-0.758795	0.1843	0.0699813	-0.0486759	-1.15069	-1.46626	-1.10561	-0.014324	0.00942846	0.611564	0.380269	-0.315036	-0.209806	0.580987	0.196684	-0.786204	-0.916894	-0.4035	-0.388574	-0.528526	-0.515306	-0.153934	-0.127058	-0.295648	0.158201	-0.474315	-0.71012	1.65056	1.17559	0.300712	0.219235	0.734921	0.183585	1.64991	2.12487	1.64991
YDL057W		108.892	69.37	48.2066	0.639476	0.404255	0.758106	-0.366506	-0.0920507	-0.166424	0.62523	0.425126	0.671093	-0.78843	-0.424254	-0.461982	-0.132227	0.0207764	0.226715	-0.107094	-0.136439	-0.430145	-0.17428	0.808909	-0.476402	-0.853986	-0.328889	0.743958	-0.732928	-1.08051	-0.520595	-0.567186	-0.482029	-0.664997	-0.264526	-0.285663	0.757456	0.557353	0.803319	-0.656204	-0.65097	-0.354888	0.339963	0.423842	-0.0643626	0.0649506	-1.15821	-1.45429	-1.15821
YDL058W	USO1	116.84	106.11	76.2223	0.366891	0.436825	-0.0630948	0.301925	0.270357	0.15951	0.243019	0.467875	-0.336962	0.361725	0.171311	0.0340394		-1.18611	-1.37702	-0.791957	0.391473	0.631113	0.250763	1.19912	0.221196	0.701252	0.163239	1.24216	-0.374723	-0.373492	-0.0649128	-0.135397	-0.169404	-0.0181558	0.165849	0.09776					1.54833	0.825997	0.170276	-0.0701394	-0.00261036	-0.0430471
YDL059C	RAD59	51.3397	41.0632	23.7289	-0.466393	-1.07687		-0.405158	-1.09716	-1.01855	-0.925392	-1.5189		-0.854939	-2.076	-1.75879		-0.564731		-0.443093	-0.862119	-0.806778	-1.08311	-1.09942	-1.43534	-1.40593	-1.38116	-1.69254	-1.63283	-1.77256	-1.33905		-1.26742	-1.29814	-1.03753							-1.3157	0.573219	0.599152	-0.343626	0.593118
YDL060W	TSR1	73.2991	66.6296	18.6949	0.373589	-0.245815	0.425187	0.00554046	-0.40917	-0.761203	0.25241	-0.428113	0.262422	-0.148258	-0.945396	-1.36715	0.667569	-0.974849	-1.55789	-0.955154	0.274668	0.910903	0.252408	0.474527	0.0668463	1.11128	0.165144	0.31703	-0.399526	0.49872	0.149752	0.790124	-0.19105	0.779816	0.368592	0.919609	-0.415159	-1.09568	-0.405147	-0.815827	0.612494	-0.411991	0.207821	-0.200373	-0.203448	0.157497	-0.00684455	1.01764	-0.00684455
YDL061C	RPS29B	173.993	172.302	27.5963	1.83828	1.34917	2.43603		0.800761	0.825826	2.30616	1.66536	2.7308		1.04296	1.04807	0.70746	2.48802	1.98537	2.19648	2.57202		2.01209	2.40023	3.10264		2.20255	2.77571			2.57658	0.133407			2.66065	0.336453	1.5987	0.957899	2.02334		-0.942417	-1.14841	-0.530619		-0.458094	-0.375479	-3.17176	-2.96576	-3.17176
YDL062W		322.575	174.554	71.0271	0.422949	0.452086	1.6423	0.70851	1.3271	0.50676	0.321622	0.487906	1.75647	1.06133	1.90792	0.5625	0.151314	0.538364	1.20541	1.67404	1.42519	0.537223	1.54614	1.32112	1.58719	0.563659	1.66307	1.39793	-0.575428	-0.121452	-0.0505335	-0.0855821	-0.34457	0.212431	0.17943	0.141994	0.170308	0.336592	1.60516	0.910014	0.702517	-1.11154	-0.161993	-0.0264365	1.48364	-0.0768135	-2.71669	-0.902639	-2.71669
YDL063C		79.2668	56.5463	35.5675	-0.114059	0.0182627	0.240445	0.0180888	0.537584	-0.784745	-0.431358	-0.0815021	0.0356441	-0.126666	0.610461	-1.40297	0.0734211	-0.961925	-1.27871	-0.768058	0.170329	0.392705	0.700162	0.313718	-0.0710297	0.351874	0.683567	0.111714	-1.83043	-1.60804	0.0979814	0.0761123	-1.43988	-1.14763	0.319697	0.285577	-0.504779	-0.154923	-0.0377771	-0.200087	1.88917	-0.634915	0.241359	0.0408316	0.36387	0.202004	-0.597138	1.92695	-0.597138
YDL064W	UBC9	233.198	146.487	84.0228	-0.593114	-0.489011	0.654814	-0.0519464	-0.121715	-0.0271499	-1.10308	-0.747316	0.544298	-0.247174	-0.473004	-0.250029		1.01623	0.135748	1.08054	-0.0031137	0.159697	0.293449	0.65359	-0.300222	0.010407	0.212662	0.545652		-0.833738	-0.421306	-0.79675		-0.439228	-0.170751	-0.489512					-0.608752	-1.33057	0.297109	0.14929	0.383413	0.107938
YDL065C	PEX19	118.315	77.4801	49.4676	0.0621311	0.523958	0.875347	0.345422	0.908154	0.227007	-0.184308	0.58224	0.81501	0.43657	1.21944	0.136758	0.893603	-0.076971	0.109379	0.194271	0.741243	0.52806	0.382279	0.752992	0.683394	0.550232	0.315512	0.672566	0.426286	0.389506	0.0798006	0.565873	0.52968	0.679898	0.302526	0.720477	-1.07791	-0.311363	-0.0785932	-0.457033	1.11006	-0.0575122	0.0578493	-0.0221716	0.0129865	0.0804266	0.021081	1.18865	0.021081
YDL066W	IDP1	140.171	82.4995	52.9475	0.493995	0.31281	0.321463	-0.220959	0.854597	0.708345	0.42124	0.305101	0.135097	-0.53799	1.13143	0.869281	-0.896709	0.0366545	0.621738	0.179298	0.146229	-0.0095547	-0.42978	0.0903516	-0.102876	-0.237625	-0.624715	-0.173474	-0.764492	-0.795409	-0.756347	-0.85378	-0.509577	-0.404161	-0.487186	-0.540154	1.31795	1.20181	1.03181	0.358719	0.509691	0.689983	0.249105	0.228071	-0.137529	0.263825	-0.341823	-0.522116	-0.341823
YDL067C	COX9	270.41	159.913	108.993	-0.720951	-0.466264	-0.37457	-0.114323	0.911013	1.12085	-1.28233	-0.717459	-0.719309	-0.354505	1.22414	1.49705		3.35171	3.56324	3.20719	0.208006	0.212479	-0.572773	0.0681643	-0.0212418	0.0877585	-0.790277	-0.201802	1.5614	0.669915	1.35836	1.13185	1.52036	0.93644	1.51008	1.22305					-2.3391	-1.71014	0.229248	0.124721	-2.30036	0.269966
YDL068W		155.005	102.34	52.5991	-0.758837	-0.516869	-0.0464317	-0.401295	0.742012	0.135384	-1.33545	-0.78388	-0.316507	-0.848292	0.94641	-0.0026777	-0.792556	0.233035	0.0981965	0.84729	-0.267321	0.0204859	-0.448444		-0.649354	-0.193602	-0.646325		-0.454305	-0.63841	-1.54615		-0.238859	-0.260525	-1.23312		-0.542894	0.00867617	0.476049	-0.0557356	0.848214	-0.849968	0.382033	0.214088	0.586798		-1.32602	0.372165	-1.32602
YDL069C	CBS1	388.081	211.961	100.26	-0.140364	0.18905	0.5322	-0.223731	0.837658	0.212097	-0.468242	0.142661	0.393785	-0.54276	1.10359	0.114069	-1.1531	-0.453611	-0.145015	0.683504	0.142806	0.574451	0.292768	0.112104	-0.1074	0.618216	0.211874	-0.145701	-0.133215	0.00211376	-0.907434	-1.00503	0.0413735	0.32548	-0.629882	-0.674466	0.684858	1.29576	1.54688	0.61034	1.24861	-0.569435	0.250206	-0.043765	0.841756	0.257805	-2.11632	-0.298279	-2.11632
YDL070W	BDF2	949.341	572.243	315.387	1.18576	0.412321	1.51523	0.783372	0.942363	1.22923	1.39122	0.435713	1.60049	1.19014	1.27566	1.66199	1.8572	0.976167	0.233625	0.706694	1.65423	1.13311	0.951876	2.23313	1.88984	1.43692	0.97501	2.56235	3.12817	1.64641	2.0857	1.82421	2.88776	1.82982	2.19703	1.83786	-0.465987	-1.42149	-0.25671	-0.667062	1.04203	0.955291	-0.235612	-0.303805	-1.22202	-0.329229	1.212	1.29874	1.212
YDL071C		114.843	79.5313	52.8871	-0.51857	-1.44002	0.216682	0.302722	-0.695814	0.486855	-0.998552	-1.99555	0.00647485	0.363097	-1.41645	0.532207	0.279655	1.12606	0.564228	0.906773	1.25725	0.954787	0.685959	-1.23369	1.36526	1.17559	0.667123	-1.86397	-0.280655	-0.678507	1.36331	-0.0635745	-0.0873059	-0.297209	1.51475	0.161537	-1.27821	-2.27521	-0.27318	0.0834424	-1.98068	-0.374565	-0.108011	-0.220799	-0.84763	0.630281	-0.101385	-1.7075	-0.101385
YDL072C	YET3	590.218	410.967	240.881	1.50602	1.25772	0.531259	-0.163408	0.981947	0.980971	1.84028	1.54532	0.392629	-0.438964	1.34071	1.28418	0.727547	2.01668	1.41439	1.29642	0.162579	0.39031	0.502159	0.472292	-0.0812711	0.348363	0.454313	0.314177	1.89056	0.763639	0.853533	0.702515	1.80763	1.02219	1.03329	0.841813	1.11273	0.817776	-0.334918	-1.16651	-0.0736772	-0.0122476	0.24385	0.0419468	-0.578975	0.158116	0.322671	0.261241	0.322671
YDL073W		99.7969	73.0044	52.6758	-0.0711008	-0.449645	-0.213242	-0.0395962	-0.162757	-0.205293	-0.371123	-0.695647	-0.521273	-0.225923	-0.54045	-0.521135	-0.546178	-1.83226	-2.06162	-1.53377	-0.614433	-0.115352	-0.0451046	-0.26099	-1.10804	-0.392667	-0.179326	-0.622056	-1.433	-1.57653	-0.951008	-1.12943	-1.09302	-1.1188	-0.671037	-0.784928	0.175056	-0.149468	0.0249052	0.320255	1.52117	1.01263	0.493605	0.277316	0.491711	0.361066	0.987729	1.49626	0.987729
YDL074C	BRE1	203.966	123.93	89.2398	-0.268977	0.360545	0.223488	0.171354	0.206775	0.334875	-0.64858	0.367755	0.0148293	0.137055	0.0668234	0.300917	0.545161	-0.608442	-1.08142	-0.401693	0.757859	0.860043	0.292917	0.492499	0.70535	1.03674	0.212046	0.339976	0.188855	0.296606	0.255542	0.36377	0.322462	0.594906	0.468507	0.541013	-1.19374	-0.177406	-0.530332	-0.408106	1.14824	0.70261	0.0525087	-0.176699	-0.256461	0.152523	1.23294	1.67857	1.23294
YDL075W	RPL31A	358.18	230.229	65.274	1.6788	1.75125	2.62364	2.35122	0.613498	0.474728	2.08255	2.19311	2.9611	3.88792	0.735215	0.513753	2.06427	1.02035	0.268803	1.00831	2.14777	1.85199	2.6213	1.92893	2.54202	2.49041	2.90793	2.17396	1.00851	0.928552	1.95986	2.16997	1.03782	1.17306	2.07817	2.14489	0.0182789	0.128838	0.896836	1.82365	0.466412	-0.494556	-0.394252	-0.638419	0.829751	-0.245036	-1.39139	-0.430424	-1.39139
YDL076C	RXT3	180.625	131.765	66.6491	-0.309618	0.165333	-0.131277	-0.0622549	0.338215	0.202508	-0.705566	0.111532	-0.420658	-0.264912	0.282826	0.0994748	-0.188075	-0.00983671	0.0367689	0.172066	-0.436714	0.233402	-0.104259	0.196179	-0.873195	0.118419	-0.247816	-0.0383572	0.241221	0.0718772	-0.130309	-0.345426	0.368164	0.389305	0.104084	-0.0887432	-0.517491	0.299608	-0.232582	-0.0768367	0.246057	-0.0725909	0.436481	0.114982	-0.351901	0.234536	0.159992	0.47864	0.159992
YDL077C	VAM6	321.161	437.442	97.7069		-0.124819	0.334499					-0.269301	0.151099						0.637618	-1.32141
YDL078C	MDH3	320.38	179.241	97.4132	0.611681	0.20514	0.539561	-0.314486	1.14604	0.962928	0.586257	0.16378	0.40282	-0.698921	1.61038	1.25672	0.845082	0.748121	1.5086	1.23365	0.281573	-0.387512	0.309017	0.544907	0.075971	-0.791509	0.230688	0.406889	0.838641	0.71627	-0.04328	0.4038	0.889565	0.978849	0.186281	0.576559	-0.258825	-0.681302	-0.442262	-1.544	0.101779	0.0230719	0.205602	0.403997	0.044407	0.138018	0.465334	0.544041	0.465334
YDL079C	MRK1	161.502	85.8144	60.4366	-0.0559024	0.0287429	-0.459524	-0.571822	0.693988	1.06207	-0.349812	-0.0677465	-0.823593	-1.14171	0.867489	1.4076	-0.883338	-0.511849	-0.0630008	-0.228773	-0.0453041	-0.304915	-0.374107	-0.0157761	-0.355974	-0.670466	-0.560255	-0.308974	-0.964046	-0.96511	-1.48981	-1.35421	-0.683738	-0.559418	-1.17992	-0.984527	0.533526	0.815592	0.059745	-0.258376	0.93049	1.63637	0.31067	0.365551	0.619662	0.293198	1.57662	0.870745	1.57662
YDL080C	THI3	114.752	82.3461	57.2209	-0.292118	-0.163597	-0.35775	-0.207241	0.473415	-0.291863	-0.681028	-0.320199	-0.698662	-0.514387	0.505008	-0.652881	-0.881777	-0.525252	-0.33663	-0.774423	-0.0944985	-0.278758	-0.497646	-0.262303	-0.420981	-0.632134	-0.703292	-0.623732	-0.918707	-1.20659	-1.00949	-0.881932	-0.644168	-0.780344	-0.726267	-0.565152	0.200749	0.561577	0.183115	0.36739	0.841638	0.121541	0.326483	0.353376	0.0229741	0.361429	-0.0615737	0.658523	-0.0615737
YDL081C	RPP1A	254.406	234.707	139.255	1.56367	1.15938	2.58688	1.52813	0.0868189	0.975372	1.92112	1.41626	2.91597	2.47163	-0.130307	1.27566	1.67636	2.66217	1.58879	2.35687	2.17058	1.52703	1.59825	2.17786	2.57216	2.0142	1.72341	2.49179	0.321883	0.255863	2.25384	0.997904	0.438562	0.55763	2.35582	1.10411	0.244752	-0.260104	1.23961	0.795264	-1.71909	-1.08122	-0.401583	-0.487162	-0.632417	-0.313932	-2.32083	-2.95871	-2.32083
YDL082W	RPL13A	267.612	288.951	73.8755	0.76292	1.48866	2.00522	1.46554	0.791584	0.298223	0.798321	1.84845	2.20196	2.36394	1.02787	0.245139	1.53576	1.24659	0.875358	1.05757	1.92549	1.44185	2.27505	1.7389	2.2483	1.88936	2.50702	1.93135	0.385418	0.327352	1.6624	1.40656	0.494013	0.623035	1.79723	1.46699	-0.737439	0.312685	0.666205	0.828176	0.152516	-0.812432	-0.322805	-0.44751	0.709792	-0.192443	-1.47864	-0.513689	-1.47864
YDL083C	RPS16B	262.425	383.577	163.811	2.10231	1.20068	2.20946	1.77615	0.72674	0.615987	2.67638	1.47046	2.45269	2.8984	0.921313	0.728728	2.1232	1.64129	0.366144	1.2843	2.04044	1.76449	2.28946	1.94433	2.40019	2.36218	2.52371	2.19363	1.0361	1.43051	2.61478	1.90307	1.0619	1.6323	2.69672	1.90789	0.553175	-0.65274	0.329483	0.7752	0.555168	-0.555577	-0.359751	-0.597691	-0.173012	-0.2493	-0.88506	0.225686	-0.88506
YDL084W	SUB2	127.19	88.0264	51.0774	0.535228	1.06061	1.11651	0.62881	0.81854	0.648346	0.479057	1.28662	1.11105	0.924191	1.07217	0.777973	0.332644	0.142693	0.0109951	-0.0394657	0.83977	0.782103	1.11354	0.582039	0.81359	0.922524	1.16219	0.454298	-0.8933	-0.813232	0.401095	-0.39408	-0.621994	-0.420467	0.605977	-0.131947	0.146413	0.953975	0.778405	0.591547	1.06118	0.817439	0.02618	-0.14042	0.556217	0.127741	0.0390339	0.282773	0.0390339
YDL085C-A		75.1302	61.4345	30.1373	0.169442	0.459204		-0.273576	0.297935	-0.71233	-0.0338402	0.497248		-0.628528	0.216631	-1.29277		1.08848	0.380435	1.4768	0.254068	0.569456	0.0235234		0.0396255	0.610895	-0.0998659		0.642514	0.583028	0.617799	0.966068	0.718394	0.856949	0.810646	1.07584					-0.163803	-2.76957	0.214443	-0.0414399	-0.910512
YDL085W	NDE2	75.465	50.8322	31.4094	0.705308	-0.273276	-0.615372	-0.574338	0.869271	0.255553	0.717539	-0.464156	-1.0149	-1.14604	1.15554	0.180202	-1.34461	-0.795292	-0.672841	-1.10347	-0.404583	-0.495872	-0.621831	-0.623729	-0.830736	-0.950307	-0.847078	-1.08519	-2.05444	-2.15716	-1.5083	-1.69979	-1.63538	-1.65	-1.19738	-1.2914	2.06215	0.880458	0.329712	0.19857	1.82838	1.28367	0.426153	0.454436	0.350305	0.461461	0.953962	1.49867	0.953962
YDL086C-A
YDL086W		290.115	223.002	142.763	0.562995	-0.46934	0.447141	0.0646507	0.950208	0.564846	0.517991	-0.721497	0.289372	-0.0465476	1.28855	0.650898	0.175094	1.33522	0.828563	0.894929	0.727459	0.770329	-0.109792	0.164473	0.665179	0.905269	-0.254222	-0.0788374	0.330972	0.485069	-0.220489	-0.0845837	0.446494	0.767328	0.0189128	0.142881	0.342897	-0.896591	0.114278	-0.221641	0.459988	-0.244031	0.0622801	-0.13494	-0.273135	0.243311	-0.358309	0.34571	-0.358309
YDL087C	LUC7	91.554	69.8782	46.3702	-0.707257	1.44876	-0.263386	-0.543942	-0.433717	-0.120649	-1.26312	1.79607	-0.582826	-1.09374	-0.985735	-0.392321	0.0241541	0.943421	0.0453995	0.206754	-0.25569	-0.223058	-0.0319756	-0.883209	-0.633984	-0.550508	-0.164124	-1.41649	0.203236	0.274233	-0.677254	0.225022	0.335012	0.574437	-0.412485	0.417807	-1.28728	1.77192	-0.60698	-1.1179	-1.03113	-0.599074	0.378294	0.32745	0.248361	0.533277	0.00790584	-0.424154	0.00790584
YDL088C	ASM4	151.093	92.2171	59.2462	0.279148	0.148165	0.407946		1.09818	0.410181	0.119987	0.0889988	0.241258		1.53171	0.415521	1.07203	-0.279898	-0.291883	-0.502645	0.824701	0.174632	0.0144507	0.729389	0.793678	0.0322946	-0.110371	0.64243	-0.752228	-0.459901	-0.160397	-0.476022	-0.498873	-0.0972102	0.0756675	-0.204711	-0.952044	-0.983032	-0.830773		1.8236	0.918167	0.0310234	0.142338	-0.186038	0.0869593	1.74894	2.65437	1.74894
YDL089W		104.815	58.6623	35.6239	-0.505045	1.22373	-0.13972		0.71088	0.163924	-0.979589	1.50072	-0.431022		0.895249	0.0407559	-1.51235	-1.04285	-0.643808	-1.01509	-0.41944	-0.324985	-0.387692	-0.301528	-0.850368	-0.699879	-0.575984	-0.673814	-1.88839	-2.35276		-2.70062	-1.49046	-1.82896		-2.18012	0.532759	3.01307	1.08133		1.53906	1.05585	0.430929	0.374893		0.372286	-0.0254751	0.45773	-0.0254751
YDL090C	RAM1	108.555	77.7198	33.503	-0.41096	-1.11109	0.142481				-0.847665	-1.56382	-0.0846099					-0.737281		-0.584071			-0.221724				-0.383822
YDL091C	UBX3	76.9966	48.6038	40.2399	-0.696366	-1.39442	-0.510709	-0.0464461	0.537194	-0.239184	-1.24785	-1.9357	-0.886424	-0.23771	0.609821	-0.572713	-0.729809	-0.822256	-0.363221	-0.766349	-0.479453	-0.324386	-1.03411	-0.653706	-0.929671	-0.699	-1.32442	-1.12346	-1.41243	-1.35538	-0.587884	-2.11631	-1.07506	-0.916469	-0.328078	-1.66126	-0.518044	-1.20589	-0.156615	0.492099	0.973042	0.193636	0.450219	0.374615	-0.996345	0.469758	0.350251	1.12966	0.350251
YDL092W	SRP14	218.878	191.803	106.938	0.850957	0.324988	0.39136	0.478907	1.02347	0.85218	0.921764	0.321085	0.220898	0.666255	1.40895	1.08818	0.727581	1.32039	1.17538	1.19919	-0.195742	0.0312829	0.482458		-0.554767	-0.177779	0.431504		0.287808	-0.126191	0.461132	0.226364	0.408823	0.208096	0.66268	0.418998	0.194183	-0.406496	-0.506683	-0.0613263	0.233572	-0.111009	0.359025	0.209062	-0.231176		0.395674	0.740255	0.395674
YDL093W	PMT5	39.4535	26.4621	16.632	-0.109115	-0.721829	0.0208757	-0.349929	0.0107896	-0.594489	-0.424425	-1.0529	-0.233885	-0.759907	-0.255251	-1.11343	-1.21388	-1.2745	-1.44606	-1.56321	-0.912799	-0.689247	-0.263214	-0.372318	-1.50231	-1.23369	-0.43186	-0.764196	-2.00472	-2.3004	-1.87862	-1.72145	-1.59199	-1.78106	-1.54713	-1.31063	0.789456	0.160983	0.979996	0.453973	1.19081	0.449778	0.589509	0.544446	1.11527	0.391878	-0.530218	0.210813	-0.530218
YDL094C		118.809	89.2171	60.1234	0.628354	-0.0774597	-0.00787819	-0.0476848	0.100682	-0.259914	0.609635	-0.207141	-0.269181	-0.239841	-0.107526	-0.60426	-1.60646	-0.129804	-0.112992	0.0592092	-0.321018	0.188935	-0.280745	0.932491	-0.720311	0.0532542	-0.452158	0.901744	-1.67113		-0.886854		-1.30085		-0.610445		2.2161	1.39932	1.33728	1.36662	0.00546657	-0.663469	0.399293	0.13568	0.158287	0.0307469	-2.00075	-1.33181	-2.00075
YDL095W	PMT1	114.507	80.7553	51.6708	0.725588	0.763006	0.760032	0.118839	0.428928	0.230178	0.745975	0.895998	0.673456	0.0466923	0.4319	0.141585	0.828864	-0.0134447	-0.434057	-0.688585	0.869032	0.160151	0.334889	0.714272	0.852258	0.0110724	0.260643	0.623129	-0.000861759	-0.342564	0.0178361	0.602936	0.156885	0.0101391	0.244003	0.753389	-0.0828895	0.0671337	-0.155408	-0.782172	0.865957	0.830171	0.0167742	0.149078	0.0166405	0.0911432	0.985579	1.02136	0.985579
YDL096C	OPI6	224.729	186.977	104.936	0.341504	0.987267	-0.061318	0.159959	-0.86756	0.0335626	0.207421	1.19035	-0.334781	0.117448	-1.69869	-0.157634	0.990823	2.22245	1.59401	1.27144	1.15844	-0.228937	0.586079	0.660518	1.2347	-0.559124	0.551478	0.554497	0.0255284	-0.15299	0.407312	0.433597	0.179917	0.183578	0.611849	0.603018	-0.783402	0.199526	-1.3256	-0.873375	-3.29271	-1.42907	-0.076252	0.330186	-0.0603707	0.106021	-0.103471	-1.9671	-0.103471
YDL097C	RPN6	286.55	194.575	128.821	0.869659	0.586992	-0.373329	0.287803	0.721649	0.642335	0.947987	0.664974	-0.717785	0.337427	0.912946	0.768825	1.54497	0.646257	0.437819	0.160523	0.668339	0.325785	0.497043	0.565689	0.587056	0.253804	0.448391	0.433422	0.87741	0.697303	0.712278	0.979275	0.923401	0.961497	0.899878	1.08757	-0.596978	-0.879991	-2.26275	-1.20754	0.475127	0.608302	0.0812831	0.0719808	-0.451488	0.132267	2.87105	2.73788	2.87105
YDL098C	SNU23	280.465	153.421	83.7745	-0.0558066	-0.170476	-0.31509	-0.0468073	0.274018	-0.173481	-0.349678	-0.329228	-0.646296	-0.238331	0.177328	-0.472723	-0.26666	0.325373	0.314432	0.189382	-0.328055	-0.122633	-0.348803		-0.72961	-0.403338	-0.530957		0.257689	0.976897	-0.160254	-0.203676	0.382537	1.21729	0.0758024	0.037129	-0.0830179	-0.062568	-0.379636	0.0283283	-0.137104	-0.662105	0.401555	0.280705	-0.606759		-0.282469	0.242533	-0.282469
YDL099W	BUG1	118.221	83.5854	52.7432	1.13825	1.10296	1.02673	0.582829	0.562583	0.48349	1.3246	1.3422	1.00084	0.845072	0.651544	0.527087	0.937958	-0.414602	0.283952	0.107074	1.03802	0.570303	0.795114	1.13083	1.07556	0.612137	0.793506	1.15498	0.620761	0.33455	0.395404	0.637018	0.699409	0.62962	0.600602	0.783653	0.386641	0.404242	0.062879	-0.0928859	0.367592	0.420013	-0.0375425	-0.0418343	0.192904	-0.0241478	0.357134	0.304713	0.357134
YDL100C	GET3	195.298	136.989	93.4883	0.59037	0.702696	0.720736	0.359105	-0.141567	0.206615	0.556374	0.816839	0.625219	0.460115	-0.505627	0.105726	1.14945	0.749437	0.527676	0.21279	0.677822	0.367689	0.755084	0.55127	0.599587	0.315213	0.747158	0.415013	0.877288	0.328697	0.368804	0.65779	0.923294	0.624265	0.57548	0.802098	-0.593079	-0.332615	-0.524235	-0.689339	-1.0333	-0.107064	0.078235	0.0524759	0.171679	0.136257	0.417171	-0.509068	0.417171
YDL101C	DUN1	109.812	71.945	49.4576	-0.36692	-0.325131	-0.293818	-0.552962	-0.126547	-0.471895	-0.785913	-0.532218	-0.620182	-1.10926	-0.480945	-0.926862	-0.345458	-0.752185	-0.649524	-1.04207	-0.309047	-0.310805	-0.586116	-0.963047	-0.704492	-0.679098	-0.805726	-1.51842	-0.911018	-0.844026	-1.17351	-1.07523	-0.637457	-0.44864	-0.881181	-0.736798	-0.440455	-0.18676	-0.274725	-0.763804	0.168579	0.115212	0.395445	0.368293	0.0754554	0.555374	0.389937	0.443304	0.389937
YDL102W	CDC2	118.431	87.5296	57.7402	-0.0819674	-0.914195	0.138432	-0.212526	0.0055511	0.0319459	-0.38636	-1.30538	-0.0895804	-0.52348	-0.26386	-0.160094		-0.536378	-1.30426	-0.663099	0.393581	0.318913	-0.102833	1.02114	0.223982	0.243733	-0.246166	1.01492	0.260159	-0.443926	-0.328398	-0.209848	0.384692	-0.0825951	-0.0830033	0.0316486					1.0404	0.503005	0.169599	0.0751797	-0.163163	0.00621237
YDL103C	QRI1	100.635	69.5115	43.3599	-0.557639	-1.1542	0.291309	-0.176397	-0.085057	-0.545477	-1.05333	-1.62039	0.098082	-0.461313	-0.412761	-1.03884	-0.3229	-0.276478	-0.559134	-0.8136	-0.612469	-0.583453	-0.718657	-0.181218	-1.10544	-1.07865	-0.959186	-0.520205	-0.96728	-1.04159	-0.679313	-0.743498	-0.686561	-0.629392	-0.41443	-0.442225	-0.730435	-1.29749	0.420982	-0.138413	0.146373	-0.225242	0.492974	0.495202	-0.544756	0.338988	-0.646224	-0.274609	-0.646224
YDL104C	QRI7	83.9943	57.4514	33.9427	0.407632	0.367803	0.60666	-0.253918	0.803202	-0.0271095	0.300145	0.377281	0.485186	-0.594702	1.04697	-0.249967	0.0791265	-0.47349	-0.45501	-0.340485	0.0346255	-0.149285	-0.102773	0.27379	-0.250353	-0.442396	-0.246096	0.060735	-0.273162	-0.610961	-0.742474	-0.255934	-0.0807658	-0.235413	-0.474083	-0.00927588	0.221018	0.298154	0.40606	-0.673829	1.50198	0.0905181	0.284978	0.293111	0.227987	0.213055	-0.315542	1.09592	-0.315542
YDL105W	NSE4	98.1903	69.9901	42.995	0.459166	0.711175	0.391597	-0.0720095	0.223719	0.176172	0.372404	0.827969	0.221189	-0.281696	0.0946683	0.0593967	0.248238	-0.368924	-0.170912	-0.238099	0.364832	0.202128	0.597322	0.498529	0.185993	0.0725893	0.564496	0.347675	-0.441325	-0.886063	-0.219276	-0.361746	-0.227531	-0.487099	0.0200586	-0.103235	0.124166	0.57973	-0.0270497	-0.529935	0.26558	0.297496	0.178839	0.129539	0.544437	0.150854	0.324545	0.29263	0.324545
YDL106C	PHO2	87.3644	65.7894	42.1971	0.170664	-0.268612	-0.368993	0.138233	0.146319	0.267377	-0.0321268	-0.458035	-0.712463	0.0800632	-0.0325276	0.198196	-0.502221	-1.00855	-1.05185	-1.2997	0.0601041	-0.104898	-0.24731	-0.0501558	-0.216684	-0.377348	-0.413445	-0.352869	-0.974837	-1.25778	-1.02398	-1.12156	-0.693156	-0.827181	-0.739958	-0.777942	0.470094	0.044186	-0.210242	0.582284	1.01932	1.4979	0.276788	0.27245	0.326513	0.302714	1.70814	1.22957	1.70814
YDL107W	MSS2	129.816	86.2931	52.393	1.05666	0.459072	0.594262	0.14936	0.244695	0.316884	1.2102	0.497076	0.469968	0.0992103	0.12914	0.273537	0.356733	-0.0414465	0.0515632	0.00874017	0.398975	0.226135	0.403984	0.737877	0.23111	0.107771	0.340644	0.653267	0.0416289	-0.152731	-0.416916	0.0105473	0.193969	0.183815	-0.166606	0.227356	0.853464	0.140343	0.113235	-0.257522	0.077577	0.264797	0.167865	0.118365	0.507249	0.08461	0.151562	-0.0356581	0.151562
YDL108W	KIN28	204.731	142.414	90.4831	0.456871	0.534406	0.427987	0.0458954	0.152735	0.252114	0.369186	0.595953	0.265859	-0.0788196	-0.0219843	0.174969	0.653932	0.2453	0.503787	0.321037	0.53345	0.0646482	0.293342	0.404205	0.408809	-0.128883	0.212538	0.227244	0.426655	0.0413826	0.0113991	0.370317	0.530002	0.361406	0.237923	0.546827	-0.284746	-0.0579786	-0.388072	-0.732751	-0.525771	-0.146068	0.124641	0.193532	-0.0253849	0.17696	0.242004	-0.137699	0.242004
YDL109C		56.6391	38.0895	23.9658	-0.0592033	0.109441	-0.0427042	0.827347	0.110731	-0.037338	-0.35444	0.0381719	-0.311932	1.26581	-0.0910118	-0.265534		-1.0521	-1.39442	-1.74791	-0.259604	-0.109398	-0.500427	-0.216738	-0.639157	-0.383943	-0.706512	-0.565556	-2.17189	-2.10312	-1.98918	-1.71467	-1.73789	-1.60057	-1.65155	-1.30461					1.3034	1.48238	0.379553	0.274545	0.945043	0.348818
YDL110C	TMA17	950.523	535.556	272.537	1.22902	0.407929	1.22486	0.224253	1.03292	1.86954	1.45188	0.429948	1.24405	0.228077	1.42448	2.63645	1.11878	1.71691	2.41639	2.7638	0.985568	0.682459	1.16018	0.00841359	1.00625	0.776498	1.21619	-0.27809	1.86483	1.53521	1.00393	0.986932	1.78518	1.72809	1.17533	1.09437	0.333098	-0.688833	0.125265	-0.890704	-0.99191	-0.127355	-0.0206842	-0.0940392	0.0408584	0.286503	-0.25262	-1.11717	-0.25262
YDL111C	RRP42	142.927	95.9179	51.1853	-0.244938	0.38107	0.084884	0.186007	0.680366	0.168984	-0.614873	0.394694	-0.155312	0.162268	0.845103	0.0484575	0.0639956	0.300468	-0.559769	0.197614	0.77227	0.468143	0.704928	0.376542	0.724394	0.462425	0.689086	0.191925	-0.655224	-0.300965	0.659631	-0.260037	-0.414212	0.0481982	0.850155	-0.0129185	-0.678869	0.330698	-0.219308	0.0982722	1.40487	-0.149157	0.0478764	0.00571799	-0.161069	0.184617	0.0701511	1.62418	0.0701511
YDL112W	TRM3	91.2088	71.2226	53.3407	-0.504933	-0.0409422	-0.142839	-0.0699714	-0.635206	-0.434135	-0.979432	-0.15921	-0.43485	-0.278189	-1.31685	-0.869397	0.253919	-1.37394	-1.72234	-0.315261	0.163274	0.169315	0.365364	0.160995	-0.0803528	0.0245026	0.295928	-0.0832791	0.315298	0.328212	-0.240843	0.460742	0.432815	0.623822	-0.000310992	0.627123	-1.23335	-0.41313	-0.68877	-0.532109	0.405489	-0.554136	0.243627	0.144813	0.296239	0.244274	0.134634	1.09426	0.134634
YDL113C	ATG20	238.87	143.344	84.8508	-0.563221	-1.04898	-0.30678	0.798734	0.6175	0.150232	-1.06116	-1.48229	-0.636095	1.21657	0.741792	0.0199189	-0.591656	-0.681738	-0.670255	-0.629534	-0.543114	-0.537221	-0.590971	-0.810024	-1.0138	-1.0109	-0.811347	-1.32305	-0.186162	-0.958764	-0.886836	-0.830636	-0.00483661	-0.553612	-0.610428	-0.519603	-0.469506	-0.890635	-0.0444389	1.80823	1.41205	0.649453	0.470681	0.473682	-0.20092	0.513022	0.693892	1.45649	0.693892
YDL114W		79.6425	56.2023	19.8452	-1.02629	-0.326862	-0.519156		-0.242133		-1.71046	-0.53449	-0.896794		-0.670893					-1.23302
YDL114W-A
YDL115C	IWR1	380.045	219.058	96.0105	0.373487	-0.368911	0.140889	0.0663812	0.616862	-0.0648491	0.252267	-0.58968	-0.0865642	-0.04357	0.740743	-0.307401		0.0532394		0.399482	0.108329		0.383042		-0.152959		0.316396				-0.422122				-0.171522							-0.706883	0.261288		0.487918
YDL116W	NUP84	122.24	84.445	41.9578	0.560509	1.14669	0.766075	0.312721	0.252023	-0.00203768	0.514504	1.3996	0.680874	0.380302	0.141182	-0.211812	-0.224729	-0.738908	-1.20772	-0.713775	0.181265	0.297791	0.412575	0.215753	-0.0565782	0.21278	0.350591	-0.0133647	-0.372934	-0.357166	-0.208261	-0.0893701	-0.167842	-0.0032198	0.030462	0.138631	0.739233	1.62433	0.905604	0.605031	1.3489	0.501963	0.237844	0.0850112	0.320129	0.229118	-0.40364	0.4433	-0.40364
YDL117W	CYK3	188.627	133.194	82.2136	0.252032	0.180649	0.145576	0.133452	0.428409	0.0739757	0.0819663	0.131636	-0.0808102	0.0718368	0.431048	-0.0961312	0.365869	-0.849412	-0.896114	-0.778184	0.316973	0.319246	0.0824754	0.503308	0.12275	0.244222	-0.0316094	0.353776	0.759678	0.0435788	-0.133573	0.281927	0.82065	0.363415	0.101002	0.468337	-0.283903	-0.234233	-0.446679	-0.294032	1.32716	0.682053	0.194223	0.0750245	-0.132611	0.149532	1.12873	1.77384	1.12873
YDL118W		111.653	71.9637	33.385	-0.743184	-0.959191	0.425899	-0.704992	0.0559173	0.221417	-1.3135	-1.36444	0.263296	-1.37086	-0.18109	0.128253	-0.958907	0.235523	-0.275666	0.651173	-0.099055	-0.1778	-0.520412	-0.119201	-0.427002	-0.484184	-0.729651	-0.441024	-0.428129	-0.781044	-1.52718	-1.3737	-0.216014	-0.391018	-1.21521	-1.00184	-0.354594	-0.405536	1.2222	-0.411951	0.094576	-0.52292	0.327947	0.306384	0.485555	0.321823	-1.74512	-1.12763	-1.74512
YDL119C		229.499	130.654	74.3365	0.46214	-0.0132864	0.239196	-0.802268	0.122785	0.0562087	0.376574	-0.122911	0.0341109	-1.53824	-0.071203	-0.12317	-0.465728	-0.181925	0.183267	0.427462	-0.146881	-0.16949	-0.359269	-0.156882	-0.4902	-0.472006	-0.543075	-0.489134	-0.0489054	-0.706765	-0.953482	-0.731197	0.114955	-0.323062	-0.673373	-0.431302	0.842302	0.342817	0.499839	-1.07251	-0.25447	-0.550632	0.34332	0.302516	0.130298	0.332252	-1.05047	-0.754309	-1.05047
YDL120W	YFH1	236.014	153.241	82.7128	0.607164	0.185819	1.14191	0.112517	0.427412	0.519445	0.579924	0.138421	1.14222	0.0358156	0.42941	0.581805	-0.62279	0.261197	0.754767	0.91011	0.361084	0.631351	0.6224	0.0834981	0.181039	0.701601	0.593532	-0.182224	-0.692656	-0.388351	-0.91048	-1.08564	-0.446881	-0.0317504	-0.632759	-0.74604	1.20271	0.761211	1.76501	0.658606	-0.325357	-0.328305	0.180044	-0.0702502	1.22629	0.265722	-2.09332	-2.09037	-2.09332
YDL121C		282.737	160.032	76.918	-0.336628	-0.307744	0.539783	0.375292	-0.137629	0.506866	-0.743438	-0.509397	0.403093	0.487967	-0.499156	0.562662	-0.677657	0.771052	1.44863	1.63845	0.329721	0.281154	0.676994	0.19081	0.139596	0.188398	0.656743	-0.0452117	-1.19354	-1.09182	-0.390012	-0.798226	-0.884034	-0.675345	-0.141195	-0.490822	-0.0657814	0.16826	1.08075	1.16562	-1.94779	-1.07579	0.190125	0.0927554	0.797938	0.236022	-2.15654	-3.02854	-2.15654
YDL122W	UBP1				0.707561	-0.0974033	0.509824				0.720698	-0.233318	0.366317					-0.973703		-1.15891			0.589246				0.555146				0.389402				0.594933										-0.0397875
YDL123W	SNA4	690.36	416.02	228.62	0.424357	0.812559	1.34395	0.29355	1.72209	1.31054	0.323596	0.961039	1.39024	0.347314	2.55703	1.78573	0.315746	1.7332	2.03632	2.47096	0.955268	0.866977	1.1631	0.892143	0.966212	1.0469	1.21958	0.85023	1.13484	0.309061	0.486929		1.14807	0.606301	0.687044		0.00784988	0.645292	1.07449	0.0315681	0.520713	-0.685223	-0.0109446	-0.179927	0.532531	0.0419139	-1.75971	-0.553777	-1.75971
YDL124W		269.045	150.867	113.188	0.292399	0.477785	0.330322	0.000914375	1.50174	1.43987	0.138568	0.521636	0.145972	-0.156218	2.19491	1.98255	-0.0900786	1.18315	1.62256	1.39232	0.165792	-0.372722	0.553119	0.141902	-0.0770258	-0.769836	0.513317	-0.107656	1.5356	0.146658	-0.389787	-0.782801	1.49784	0.45772	-0.140983	-0.477125	0.228647	0.611715	0.236051	-0.066139	0.572349	0.590235	0.242817	0.397114	0.654301	0.249558	0.354184	0.336298	0.354184
YDL125C	HNT1	1803.2	1218.25	719.827	0.839698	1.40322	1.30826	0.653637	1.5982	1.5484	0.905976	1.7363	1.34643	0.96691	2.35343	2.14771	1.40519	2.1273	2.40843	2.8049	1.53063	0.788595	1.10721	1.74228	1.72651	0.932037	1.15487	1.93566	2.79012	2.24007	1.39462	1.47069	2.59273	2.37295	1.54433	1.52394	-0.49921	0.331112	-0.0587541	-0.438275	-0.0549933	-0.657187	-0.195884	-0.143442	-0.389462	-0.193379	-0.598433	0.00376081	-0.598433
YDL126C	CDC48	800.168	511.696	303.173	1.13074	1.17083	0.807699	0.418607	1.032	1.17847	1.31407	1.43128	0.73197	0.562499	1.42297	1.58474	2.24556	0.661903	0.546679	0.492719	1.00029	0.768567	0.985128	0.805903	1.02571	0.902687	1.01351	0.740121	2.49056	1.9982	1.5191	2.07765	2.33129	2.15167	1.66189	2.06291	-0.931489	-0.814271	-1.51359	-1.68306	0.876289	1.09202	-0.0254167	-0.13412	-0.64838	0.0657825	2.6056	2.38987	2.6056
YDL127W	PCL2	93.2312	65.8868	41.5356	0.646181	0.621304	0.368363	0.486645	0.237535	0.198044	0.634632	0.71001	0.192669	0.679569	0.117373	0.092682	-0.168989	0.0600828	-0.164166	0.0440822	0.754909	0.264654	0.687284	0.442959	0.701452	0.164219	0.668657	0.276725	-1.54011	-1.28168	0.124384	-1.14409	-1.1865	-0.849046	0.344633	-0.797942	0.803621	0.879	0.361658	0.848559	0.281539	0.0485998	0.0534569	0.100435	0.324024	0.166234	-0.313058	-0.0801186	-0.313058
YDL128W	VCX1	70.7923	45.2464	30.8181	0.863539	-0.1191	0.701558	0.159486	0.703163	0.411261	0.939406	-0.261795	0.601678	0.116634	0.882568	0.417166	0.493526	0.053986	-0.226193	-0.316811	0.710746	0.435119	0.819654	0.571947	0.643093	0.414029	0.821919	0.441413	0.136915	-0.137528	-0.174566	0.136027	0.277131	0.197723	0.062286	0.33878	0.445879	-0.755321	0.108151	-0.376893	1.10876	0.733977	0.0676522	0.0210895	0.759633	0.130534	0.625826	1.00061	0.625826
YDL129W		255.834	198.846	150.566	0.261315	-0.949066	-0.104629	-0.0387998	-0.345737	-0.506285	0.0949818	-1.35115	-0.387946	-0.224553	-0.841151	-0.979199	0.147917	0.794708	0.261269	0.796683	0.145438	-0.163371	-0.267654	-0.0160984	-0.103922	-0.463038	-0.437	-0.309386	0.125287	-0.0609816	0.17486	-0.269874	0.266982	0.267755	0.392306	-0.0216543	-0.0529355	-1.49907	-0.535863	-0.37247	-1.10242	-1.77588	0.24936	0.299667	-0.829306	0.293288	-1.24002	-0.566557	-1.24002
YDL130W	RPP1B	318.856	295.808	143.621	2.16278	1.9638	2.63343	2.1462	0.91222	1.22252	2.76117	2.47208	2.97312	3.53513	1.22612	1.65177	1.80564	2.07423	1.14897	1.2916	2.55487	2.33729	2.01561	2.57595	3.07997	3.20161	2.20664	3.00006	0.711382	0.860219	1.42806	1.78562	0.7785	1.11055	1.57591	1.8036	0.95553	0.666443	1.16747	1.72949	0.0771544	0.360176	-0.525105	-0.864312	0.630732	-0.424112	-0.807299	-1.09032	-0.807299
YDL130W-A	STF1	296.788	178.815	105.17	-0.0333669	-0.466635	-1.65092		0.693949	1.19826	-0.318213	-0.717947	-2.28607		0.867426	1.61486		1.62861	1.93959	1.70647																					-1.07217	-0.0916141
YDL131W	LYS21	101.201	78.725	29.1824	0.23411	0.101386	0.406307	0.532628			0.0568358	0.0275996	0.239246	0.758693				-0.28434	0.586277	0.144028	0.905958	0.411208		0.81736	0.901053	0.378989		0.754748	-0.727151	-1.25496		-0.398939	-0.476987	-0.824601		-0.136262							0.0049049	0.0322191		0.0626117
YDL132W	CDC53	267.834	182.792	97.6211	0.403941	-0.185995	0.0632354	-0.257658	0.307386	-0.0831779	0.294969	-0.349597	-0.181887	-0.601138	0.232164	-0.335295	0.0868019	-0.812916	-1.21383	-0.66107	0.067235	-0.0328734	-0.0151704	-0.0908477	-0.207261	-0.271798	-0.144667	-0.404824	-0.387695	-0.439638	-0.124622	-0.0812267	-0.180725	-0.078672	0.109456	0.145862	0.208167	-0.436399	-0.268689	-0.687939	1.446	0.325775	0.274496	0.238925	-0.254123	0.313976	0.594464	1.71469	0.594464
YDL133C-A	RPL41B
YDL133W						0.163021						0.108498
YDL134C	PPH21	320.78	194.081	112.497	0.232926	0.586823	0.720603	0.148368	0.728276	0.578545	0.0551762	0.664752	0.625057	0.0975036	0.923837	0.671746	0.955392	0.476194	0.521034	0.760037	0.788625	0.364632	0.254712	0.591316	0.746006	0.310733	0.167812	0.466142	0.873275	0.82898	0.459787	0.802271	0.919792	1.08197	0.661409	0.930395	-0.900216	-0.290641	-0.330336	-0.857889	0.402803	-0.088291	0.0426194	0.053899	-0.493597	0.125174	0.242045	0.733139	0.242045
YDL135C	RDI1	260.318	159.66	89.5488	0.273819	0.666796	0.538091	0.318237	0.203047	0.34952	0.112515	0.769719	0.401016	0.389794	0.0606978	0.323204	0.071047	0.465508	0.591487	0.636567	0.618464	0.447156	0.317335	-0.262711	0.52115	0.431669	0.240318	-0.624253	0.532828	0.321827	0.200791	0.321483	0.622665	0.61798	0.416797	0.503463	0.0414684	0.698672	0.329969	0.318747	-0.530789	-0.313363	0.0973144	0.0154867	-0.176478	0.361542	-0.643332	-0.860758	-0.643332
YDL136W	RPL35B	451.391	460.29	128.322	1.84154	1.70858	2.1158	1.64944	0.796728	0.554943	2.31073	2.1371	2.33771	2.68037	1.03633	0.635827	1.60613	1.31207	0.745786	1.37396	2.08604	1.97703		1.96512	2.46045	2.67365		2.22017	0.296455	0.329548		1.59088	0.41637	0.625044		1.63067	0.704597	0.53097	0.731577	1.07424	0.290543	-0.738132	-0.374409	-0.69662		-0.255052	-1.46971	-0.441034	-1.46971
YDL137W	ARF2	567.475	371.822	173.827	0.866247	1.47871	1.76039	1.13452	1.3218	0.953908	0.943203	1.83539	1.90144	1.79436	1.89921	1.24299	1.05077	1.64721	1.7136	1.76587	1.38267	1.32913	2.04625	1.61814	1.531	1.72417	2.24211	1.77716	0.138961	0.427997	1.52771	0.802929	0.278916	0.715113	1.67003	0.930979	-0.107565	0.784617	0.85067	0.743592	0.185607	-0.522874	-0.148325	-0.395043	0.572086	-0.159019	-1.37354	-0.665063	-1.37354
YDL138W	RGT2																						0.114977				0.00602149				-1.46534				-1.15681										1.16283
YDL139C	SCM3	69.3813	58.5866	33.3766	-0.246043	-0.764705	-0.782636	-0.606225	0.248319	-0.681932	-0.616422	-1.10917	-1.22022	-1.20091	0.135096	-1.24651	-0.407515	-1.03392	-0.890139	-1.31922	0.0368096	-0.236389			-0.247466	-0.570044						-0.740124				-0.439229	-0.208907	-0.701659	-0.81271	-0.793396	1.02523	0.0727093	0.284276	0.333655			0.885419	1.83794	0.885419
YDL140C	RPO21	144.576	109.958	62.2543	0.0837033	0.660371	1.04997	0.966957	1.80719	0.583257	-0.15406	0.761287	1.02936	1.50603	2.69687	0.678917		-0.307916	-0.156926	0.065739	0.151389	0.913516	1.12407	1.1259	-0.0960581	1.11511	1.17439	1.14869	-0.200957	-0.183158	-0.401464	0.0383616	-0.0177485	0.155977	-0.152011	0.252055					2.8538	0.613178	0.247447	-0.201589	1.3264	-0.0227839
YDL141W	BPL1				-0.237836	-1.15395	-0.525709	0.121805	0.142805		-0.604915	-1.62007	-0.904837	0.051797	-0.0383025		-0.59866	-0.775897	-0.104165	-0.892409	-0.292397	-0.320293	0.0269348	-0.417905	-0.68249	-0.693003	-0.0959161	-0.8224			-1.31998	-1.73553			-1.01952	-1.32314	-0.00625491	-1.02141	-0.306177	0.650457	0.0658626		0.390093	0.37271	0.923602	0.404495		0.37204
YDL142C	CRD1	194.008	110.822	86.0948	0.333379	-0.690316	-0.129349	0.393533	0.213662	0.37178	0.196029	-1.01154	-0.418291	0.519354	0.0781415	0.357081		-0.0344713	0.460841	0.105171	0.120037	-0.0258501	-0.399637	0.180279	-0.137487	-0.261506	-0.589815	-0.0586574	-0.984407	-0.711212	-1.02894	-1.66735	-0.701508	-0.327131	-0.744639	-1.26259					-0.3827	0.25191	0.257524	0.235656	0.154825	0.238936
YDL143W	CCT4	145.74	99.9714	61.4556	1.08484	1.20351	0.45197	0.453633	0.544653	0.0253569	1.24971	1.47417	0.295299	0.622767	0.622078	-0.170121	0.865225	0.194111	-0.463895	-0.00335488	1.02705	0.811034	1.34046	0.603549	1.06106	0.964921	1.42493	0.481761	0.0198699	0.176267	0.726509	0.690396	0.174979	0.484809	0.913319	0.831052	0.384485	0.608946	-0.569926	-0.242458	1.08597	-0.166767	-0.0340168	-0.153887	0.511611	0.121788	0.403159	1.6559	0.403159
YDL144C		218.744	160.226	101.246	1.04198	0.91442	0.997807	-0.156756	-0.0184471	0.0528392	1.18962	1.09473	0.965334	-0.427518	-0.303297	-0.128298	0.616914	0.700528	0.822809	0.613228	0.648259	0.014844	0.431011	0.487118	0.560522	-0.20187	0.371936	0.333106	-0.242738	-0.513413	0.15659	0.154585	-0.0542131	-0.146168	0.37505	0.355259	0.572702	0.477821	0.34842	-1.04443	-1.12611	-0.741525	0.0877373	0.216714	-0.00311425	0.154012	-1.08995	-1.47453	-1.08995
YDL145C	COP1	286.508	194.571	131.291	0.850498	-0.513783	0.270309	0.0246804	0.691175	0.292018	0.92112	-0.77983	0.072304	-0.115324	0.862866	0.235696	0.149456	0.277757	0.138979	0.372913	0.609567	0.499913	1.23858	0.362372	0.509393	0.508983	1.30697	0.173834	0.278754	0.119862	0.584931	0.551563	0.400921	0.433205	0.779603	0.70777	0.771664	-0.929287	-0.0771521	-0.26478	0.723887	-0.137217	0.100174	-0.00907	0.527368	0.188538	-0.0600654	0.801039	-0.0600654
YDL146W	LDB17	146.231	78.0457	48.3538	-0.264645	0.1823	-0.344997	0.11948	0.789222	-0.0273706	-0.642505	0.133802	-0.683007	0.0477965	1.02399	-0.250365	-0.424096	-0.719233	-0.742642	-0.526817	-0.561154	-0.829269	-0.614498		-1.03763	-1.43889	-0.838588		-0.267498	-1.22779	-0.798755		-0.0758226	-0.799737	-0.527239		-0.218409	0.557898	-0.258911	0.471893	1.76663	0.276452	0.47648	0.609621	-0.311349		0.535363	2.02555	0.535363
YDL147W	RPN5	447.519	292.597	182.833	0.0943063	1.04054	1.21032	0.554581	0.879847	0.521509	-0.139193	1.26027	1.2262	0.796467	1.17292	0.584946	1.6009	0.45207	0.33395	0.303595	0.571725	0.895827	0.970712	1.02491	0.459387	1.08918	0.996819	1.01975	1.00623	0.715996	1.26261	1.03732	1.03583	0.978599	1.41965	1.13911	-1.74009	-0.340625	-0.374699	-0.804432	0.838972	0.281351	0.112338	-0.193355	-0.422829	0.00516738	0.65605	1.21367	0.65605
YDL148C	NOP14	39.2806	43.0922	25.8851	0.0446492	-0.240459	-0.223386	0.222737	-0.895358	-0.640946	-0.208821	-0.421083	-0.533725	0.225469	-1.74438	-1.18413	0.0753782	-2.21308	-1.77596	-1.8002	0.348068	0.519379	0.642005	-0.143347	0.16384	0.53751	0.616232	-0.471854	-1.3748	-1.05374	-0.179568	-0.0785479	-1.04223	-0.640503	0.0575615	0.148241	-0.284199	-0.496461	-0.609103	0.15009	0.0315845	0.61607	0.184228	-0.0181308	0.55867	0.328506	1.22517	0.640687	1.22517
YDL149W	ATG9	148.849	59.6527	47.8372	-0.584287	-0.490062	0.178702		0.117279	-0.0511241	-1.0907	-0.748696	-0.0401471		-0.08025	-0.286514		-1.07583	-0.373042	-0.6558	-0.53108	-0.199115	-0.161662	-0.396275	-0.997893	-0.51542	-0.31428	-0.794784	-1.83756	-2.1679	-1.15336	-1.68077	-1.4461	-1.65984	-0.862148	-1.27451					0.292792	0.369286	0.466813	0.316305	0.547868	0.398509
YDL150W	RPC53	52.48	39.0876	27.3724	0.716371	-0.421217	0.356159	0.3452	-0.292063	-0.549855	0.733051	-0.658334	0.177688	0.436188	-0.752946	-1.04551	-0.336461	-0.641579	-2.50091	-0.482489	0.413152	0.63818	0.566479	-0.289117	0.249843	0.711609	0.528785	-0.657968	-1.62821	-0.803766	0.139402	-0.318474	-1.26339	-0.411807	0.358817	-0.0648105	1.06951	-0.321873	0.514149	0.772648	1.74796	-0.563017	0.163308	-0.0734289	0.169968	0.368851	-1.07717	1.23381	-1.07717
YDL151C	BUD30					1.14321
YDL152W		52.9724	50.6351	29.4805	0.332387	-0.591492	0.643875	0.367228	-0.34536	-1.01332	0.194638	-0.881825	0.530869	0.474092	-0.840533	-1.75083		-0.167161	0.312962	0.700138	0.252829	0.314608	0.454118	1.29658	0.0379881	0.237424	0.398691	1.3666	-1.45014	-1.5678	-0.375967	-0.0731473	-1.10798	-1.11081	-0.127931	0.153036					-1.15349	-2.45097	0.214841	0.0771836	0.526622	-0.0700225
YDL153C	SAS10	77.6245	73.4798	55.9814	0.448181	-0.566841	0.0980217	0.207402	-0.504631	-0.680286	0.357001	-0.849471	-0.139185	0.199081	-1.10227	-1.244	1.13401	-1.50347	-2.44248	-1.0425	0.080241	0.333348		0.237482	-0.190075	0.264887		0.0143782	-0.328073	-0.116563	0.548837	1.26935	-0.12869	0.216904	0.745514	1.34516	-0.777009	-1.98348	-1.2732	-0.934929	1.34021	-0.201504	0.270316	0.0684607		0.223104	1.07169	2.6134	1.07169
YDL154W	MSH5	35.8707	27.1931	14.171	-0.00133285	-0.310459	-0.595779	-0.566041	-0.203587	-0.568988	-0.273296	-0.512961	-0.990852	-1.13177	-0.607548	-1.07462	-1.29684	-1.77587	-1.70878	-1.64832	-1.02977	-0.711376	-0.73628	-0.500075	-1.65687	-1.26612	-0.97959	-0.927312	-2.29911	-2.62119	-2.2347	-1.85238	-1.84892	-2.07454	-1.88344	-1.42689	1.02354	0.783878	0.305987	0.165071	1.10123	0.5737	0.627106	0.554746	0.903845	0.427237	0.267713	0.79524	0.267713
YDL155W	CLB3	103.459	76.4253	44.2104	0.5458	0.819308	0.907236	0.429588	0.392188	0.118093	0.49388	0.969897	0.854155	0.581393	0.371524	-0.0289907	-0.581932	-0.41723	-0.340168	-0.566957	0.616018	0.492167	0.659067	0.783253	0.517917	0.497631	0.635987	0.711202	-0.84218	-0.899203	0.0250641	-0.414201	-0.577379	-0.499121	0.250829	-0.149814	1.07581	1.55183	1.43609	1.16332	0.711692	0.537966	0.0981006	-0.0054645	0.385158	0.0720514	-0.898121	-0.724395	-0.898121
YDL156W		97.7975	72.5729	51.7848	0.220931	-0.357593	0.338472		-0.658543	-0.612491	0.0383571	-0.574826	0.155976		-1.35521	-1.14083		-0.398106	-1.09241	-1.12953			-0.138392				-0.287337				-0.588284				-0.328456						-0.2628	-0.0112974			0.0411191
YDL157C		126.248	80.5784	59.8679	0.0467991	0.600778	0.202078	-0.371562	-0.23618	-0.72658	-0.205806	0.683069	-0.0114518	-0.797131	-0.661111	-1.31445		1.10299	0.614845	0.729219			0.0488824				-0.0705044		-0.580781	-0.683983	-0.313879		-0.349242	-0.302219	-0.0692906						-1.27596	-2.04367			-0.00121385
YDL158C		129.338	73.9976	59.7784	-0.222691	0.689875	-0.203558		0.72074	0.118348								0.0233511	0.717374	0.311033			0.510525				0.464				-0.822453				-0.549621										1.01362
YDL159C-B
YDL159W	STE7	95.2591	63.3235	54.2442	0.688268	-0.306447	-0.0849217	0.0910403	0.0852815	-0.469915	0.693645	-0.507694	-0.363755	-0.00113959	-0.132834	-0.923849	-0.656327	-0.733471	-0.621371	-1.22251	-0.447868	-0.407692	-0.156552	-0.339699	-0.887934	-0.821083	-0.308363	-0.72255				-1.82502				-1.4026	1.34997	0.148633	0.292572	0.655188	0.488537	0.298659	0.440066	0.413391		0.38285	0.00608681	0.195965	0.00608681
YDL159W-A
YDL160C	DHH1
YDL160C-A
YDL161W	ENT1	112.1	76.4666	38.5355	-0.261252	-0.0575622	1.00775		-0.524863		-0.637748	-0.181025	0.97754		-1.13552		0.838497	-0.545426	-0.985814	-1.25023	0.372694	0.784683	0.423278	0.565009	0.196381	0.926304	0.362983	0.432554	0.198286	-1.11764	0.241916	0.155098	0.330692	-0.698965	0.455638	0.355715	-1.47625	-1.01952	0.139042		-0.149706		0.176313	-0.141621	-0.0926555	0.132455		-0.288748
YDL162C		28.7118	26.5437	18.147	-0.0046046	-1.37185	0.285793	-0.357226	-0.620408	-0.807964	-0.277883	-1.90607	0.0913105	-0.772463	-1.29253	-1.43831	-1.53671	-0.538091	-0.575509	-0.440341	0.231002	-0.0219937	-0.566776	0.0597135	0.00914568	-0.255854	-0.783333	-0.212592		-2.18758	-1.32098			-1.67784	-1.02046		1.25883	-0.369357	1.62802	0.764248	-0.717026	-0.997966	0.221857	0.233861	0.237125	0.272305	-2.62599	-2.34505	-2.62599
YDL163W		58.9174	50.4763	30.3944	-0.318523	1.04842	0.356547	-0.254165	-0.726681	-0.788383	-0.718051	1.27062	0.178164	-0.595129	-1.46718	-1.40851		1.00033	0.403715	0.0159946	-0.154968	-0.388599	-0.0799221	0.403915	-0.500887	-0.793102	-0.219638	0.226874													-1.8709	-1.4245	0.345919	0.404503		0.177041
YDL164C	CDC9	120.12	101.034	70.0883	0.321343	0.053533	0.0307865	0.0798297	-0.0442654	-0.576789	0.179153	-0.0352087	-0.221719	-0.0204295	-0.345726	-1.08649	-0.210491	-0.976057	-0.649524	-1.53013	-0.0210529	-0.245877	-0.179926	-0.344564	-0.323928	-0.583948	-0.335426	-0.728761	-1.48189	-1.68032	-0.884812	-0.66825	-1.13569	-1.21375	-0.608516	-0.375406	0.389644	0.175283	-0.0112275	0.190062	0.303798	0.443637	0.302875	0.338071	0.27309	0.384197	0.454864	0.315026	0.454864
YDL165W	CDC36	272.718	182.031	121.131	0.972761	-0.682082	-0.213451	0.157623	0.303292	0.122541	1.09255	-1.00073	-0.521529	0.113428	0.225436	-0.0222221	-0.346411	0.821595	0.587431	0.480024	0.42439	0.122461	0.577651	-0.236758	0.264694	-0.0441608	0.54172	-0.591118	-0.407528	-0.505325	-0.350084	-0.604374	-0.198034	-0.138768	-0.103485	-0.318685	1.43897	-0.654317	-0.175118	0.459839	-0.361994	-0.502246	0.159696	0.166622	0.645205	0.354359	-0.327128	-0.186876	-0.327128
YDL166C	FAP7	60.8352	45.2211	35.59	0.383178	0.132494	-0.143825	0.364151	-0.165598	-0.817514	0.265856	0.0684307	-0.436061	0.468796	-0.545119	-1.45284	0.633099	0.0301582		0.549642	0.766028	0.424412	0.472959	0.0854597	0.716145	0.398339	0.420505	-0.17972	-0.333389	-0.234952	0.375248	0.562963	-0.133329	0.108592	0.581565	0.717893	-0.367243	-0.564669	-1.06916	-0.164303		-2.00248	0.0498829	0.0260732	-0.16106	0.265179	-0.933323		-0.933323
YDL167C	NRP1	74.3069	61.6966	34.4919	-0.329947	0.0858155	0.130658	0.11192	-0.684149	-0.351496	-0.73407	0.00716326	-0.0991237	0.0347876	-1.39728	-0.743634	0.814373	-0.488384	-1.12163	-0.786173	0.633292	0.717923	0.625529	0.241957	0.540744	0.82847	0.597155	0.020091	-0.620166	-0.162601	0.750363	0.887447	-0.383615	0.174785	0.935848	1.00603	-1.54844	-0.807209	-0.913496	-0.779585	-0.275656	0.0425388	0.0925481	-0.110547	-0.338693	0.221866	0.956035	0.637841	0.956035
YDL168W	SFA1	166.772	127.953	96.4537	0.237342	0.485528	0.297061	-0.552667	0.0947665	0.0333011	0.0613683	0.5318	0.105142	-1.10875	-0.117247	-0.158032	0.419366	0.15418	0.205932	-0.111847	0.0258617	0.298441	0.618109	0.114494	-0.261933	0.213733	0.588565	-0.142649	0.32504	1.01211	-0.219045	0.189686	0.441317	1.24951	0.0202768	0.386428	-0.357998	0.112434	-0.314224	-1.52812	-0.323179	-0.0461848	0.287795	0.0847085	0.568288	0.257144	0.268039	-0.00895537	0.268039
YDL169C	UGX2	94.4946	46.964	44.228	-1.133	-0.831166	-0.758127	-0.958235	-0.271705	-0.138025	-1.86009	-1.19641	-1.19014	-1.80661	-0.719491	-0.418764		-1.77517	0.656941	-0.135123	-0.987174	-0.951298	-1.84253		-1.60059	-1.61772	-2.26044		-1.4919	-1.52736			-1.14443	-1.07381							-1.37643	-0.283641	0.613416	0.666422
YDL170W	UGA3	85.9227	46.2949	22.9044	-0.105612	-0.0761734	0.457525				-0.419513	-0.205453	0.302118					-0.929367	0.97995	-1.11469
YDL171C	GLT1	345.707	274.055	186.171	0.667761	0.172725	0.578991	0.000859374	0.331961	0.195349	0.664891	0.121235	0.451222	-0.156312	0.27255	0.088581	0.584258	-0.0135113	0.187345	0.256277	0.401789	0.552374	0.73967	0.53591	0.234828	0.585863	0.729311	0.395402	1.33585	1.14297	0.554612	1.12582	1.32351	1.36923	0.750968	1.2177	0.0806328	-0.463023	-0.133037	-0.740571	0.0852049	-0.167696	0.16696	-0.0334891	-0.0216571	0.140508	-0.034659	0.218242	-0.034659
YDL172C		113.766	70.6917	40.9001	0.52166	-0.221737	1.60854	-0.231392	0.473295	-0.217297	0.460031	-0.39651	1.71503	-0.555942	0.504811	-0.539404	0.102335	0.766542	0.303384	0.639552	0.0633714	0.199219	-0.679256	0.618899	-0.212367	0.0683261	-0.913566	0.50136	0.143025	-0.369791	-0.989809	-0.511256	0.282463	-0.0147697	-0.707682	-0.235998	0.357696	-0.498845	1.61269	-0.658277	0.201427	-1.17896	0.275738	0.130893	-0.205884	0.11754	-2.79165	-1.41127	-2.79165
YDL173W		209.406	133.738	73.3734	0.395041	0.353212	2.07047	-0.235674	0.528717	-0.0896171	0.28249	0.35813	2.28207	-0.563311	0.59589	-0.345094	0.49604	1.03926	0.728163	0.455076	-0.237315	0.112382	0.281004	0.418246	-0.609704	-0.0589316	0.198253	0.245171	0.216061	0.0127246	0.138526	0.471325	0.346206	0.335187	0.35799	0.63652	-0.213551	-0.137911	1.78603	-1.05935	-0.132273	-0.80017	0.372388	0.171313	-0.159737	0.173074	-2.5862	-1.9183	-2.5862
YDL174C	DLD1	399.735	221.54	151.45	0.877262	0.568035	0.692301	-0.0623393	1.44461	0.330741	0.958648	0.640093	0.590314	-0.265057	2.10103	0.294626	0.396748	0.334812	1.28269	0.579735	0.158404	0.261992	0.149204	0.0486441	-0.0867875	0.160318	0.0456513	-0.226725	1.73263	0.669673	-0.532533	0.334385	1.6698	0.936218	-0.275802	0.514919	0.561899	0.243345	0.193566	-0.661805	0.818347	-0.285109	0.245192	0.101674	0.321453	0.275369	-0.478675	0.624781	-0.478675
YDL175C	AIR2	145.373	90.7972	56.6089	0.416433	-0.0506109	0.672672	-0.0490368	0.487105	0.474034	0.312484	-0.171901	0.566219	-0.242168	0.527507	0.512696	0.476553	0.0194698	0.114395	0.0702643	0.581849	0.401045	0.399322	0.977865	0.472765	0.364096	0.335246	0.959676	-0.535287	-0.802061	-0.153644	-0.240105	-0.309537	-0.410247	0.0820453	0.00478026	-0.164068	-0.648454	0.0896659	-0.718721	0.413112	0.442432	0.109084	0.0369496	0.253201	0.0181887	0.352766	0.323446	0.352766
YDL176W		73.7354	47.9121	42.7915	-0.153216	-0.833185	-0.327812	-0.295239	-0.48053	-0.523232	-0.486263	-1.19906	-0.661912	-0.665803	-1.06267	-1.00499	-0.77942	-1.06677	-1.06054	-1.01537	-0.188582	-0.289853	-0.995242	-0.556572	-0.545306	-0.648394	-1.27942	-0.999446	-1.42529	-1.4916		-0.978847	-1.0863	-1.04109		-0.651212	0.293157	-0.419636	0.117508	0.113617	-0.00213008	0.0103784	0.356724	0.358541		0.442874	-0.107129	-0.119638	-0.107129
YDL177C		130.726	77.4193	52.6524	-0.67374	0.175276	-0.371304	-0.0342914	0.572282	0.198004	-1.21613	0.124583	-0.715301	-0.216796	0.667483	0.0926215	-0.487304	-0.164953	-0.312779	0.774585	-0.112093	-0.0418747	-0.668403	0.151234	-0.444231	-0.284989	-0.901	-0.0957405	-0.52437	0.000767345	-0.663281	-0.629157	-0.300009	0.324248	-0.399288	-0.340692	-0.728824	0.611887	-0.227997	0.270509	0.980262	-0.681964	0.332138	0.243115	-0.501712	0.246975	-0.453967	1.20826	-0.453967
YDL178W	DLD2	181.954	101.686	61.3139	0.526731	-0.835502	-0.224376		0.219927	0.0737526	0.467142	-1.2021	-0.534941		0.0884364	-0.0964706	0.238716	-0.216326	-0.454734	-0.360194	-0.0799653	-0.402804	-0.489873	-0.693328	-0.401776	-0.813919	-0.694292	-1.17405	-0.845739	-1.03857	-0.115649	-0.843976	-0.580486	-0.626628	0.117931	-0.531448	0.228427	-1.44081	-0.773656		0.543171	0.263723	0.321811	0.411115	-0.812223	0.480724	1.03738	1.31683	1.03738
YDL179W	PCL9	144.356	86.4116	46.4969	0.328523	-0.312956	0.439334	0.0438983	0.363352	0.338681	0.18922	-0.516238	0.279788	-0.082256	0.324136	0.30671	0.508916	-0.0478763	-0.101932	0.0930699	0.711549	0.233722	0.851454	0.38374	0.644156	0.118888	0.858739	0.201115	0.400574	-0.190103	0.528593	0.751602	0.50724	0.149624	0.726394	0.885402	-0.319696	-1.02515	-0.229128	-0.591172	0.426067	0.21364	0.0673939	0.114833	0.132345	0.182624	0.442767	0.655195	0.442767
YDL180W		57.9733	34.3481	16.8357	-0.601661	-0.139608	-0.109901	-0.0781572	0.345806	-0.174225	-1.11506	-0.288712	-0.394418	-0.292274	0.295301	-0.473854	-1.26292	-0.96794	-0.81251	-0.777166	-0.0644978	-0.278115	-0.254399	-0.0541151	-0.381337	-0.631192	-0.421653	-0.357924	-1.18199	-1.39848	-0.928914	-1.42559	-0.87395	-0.955904	-0.650169	-1.04791	0.147863	0.974211	0.868506	0.970649	1.10781	0.303312	0.316839	0.353077	0.228516	0.303809	-0.565194	0.239305	-0.565194
YDL181W	INH1	236.295	131.261	36.0434	0.052134	-0.210468	0.151457	-0.0473405	1.33266	1.77535	-0.198326	-0.381719	-0.0735916	-0.239249	1.91706	2.4931	-0.00845786	2.15474	2.65893	2.74361	0.894177	-0.200069	-0.567359	-0.735424	0.885485	-0.516818	-0.784008	-1.2278	0.0586072	-0.33003	-0.708349		0.208787	0.0216066	-0.441853		-0.189868	-0.373261	-0.0651338	-0.230791	-0.741875	-0.25051	0.00869185	0.316749	-0.342155	0.492375	-0.185377	-0.676741	-0.185377
YDL182W	LYS20	101.732	59.3613	28.7392	0.274127	0.641139	0.685535	0.581211	1.46969	0.982882	0.112947	0.736043	0.582009	0.842287	2.14224	1.28708	1.33353	-0.224726	0.257896	-0.122881	1.00572	0.653569	0.368135	0.975759	1.03288	0.734161	0.299137	0.956988	-0.440834	-0.639722	-0.284547	0.596169	-0.227102	-0.261726	-0.0415875	0.747379	-1.22058	-0.597487	-0.751522	-0.491244	1.88434	1.40997	-0.0271619	-0.0805921	0.340724	0.0187716	2.16149	2.63587	2.16149
YDL183C		114.096	66.3791	52.753	-0.19054	-0.321283	-0.897406	-0.509419	-0.211367	-0.283252	-0.538597	-0.527167	-1.36111	-1.03434	-0.620334	-0.639776	-1.42734	-0.721207	-0.329138	-0.252081	-0.529965	0.472586	-0.68099		-0.99642	0.468937	-0.915574		-1.40686	-0.702321		-1.75013	-1.0702	-0.318996		-1.33609	0.888747	0.900177	0.0662351	0.393005	-0.291197	-0.387695	0.466455	0.00364961			-0.453931	-0.357432	-0.453931
YDL184C	RPL41A
YDL185C-A
YDL185W	TFP1	868.912	504.515	314.625	0.667058	1.11949	1.53751	0.437476	1.38575	1.25455	0.663905	1.36389	1.62784	0.594966	2.0043	1.70053	0.983405	0.990908	1.13198	1.1851	1.43027	1.023	1.20574	0.73157	1.5939	1.27555	1.26894	0.645214	1.3175	1.28882	1.55729		1.30749	1.50266	1.69797		-0.3195	0.380486	0.644432	-0.38844	0.872324	0.515429	-0.163626	-0.252551	-0.429025	0.0863558	-0.129003	0.227892	-0.129003
YDL186W		283.413	195.009	115.503	0.272044	0.224789	-0.42498	1.27279	0.688091	0.0439281	0.110027	0.18957	-0.781189	2.03227	0.857799	-0.141859	0.45591	0.821093	0.0197833	-0.0744179	-0.624959	0.275291	0.518744	0.285782	-1.12195	0.179807	0.473516	0.076046	-0.903296	-0.354649	0.0082247	0.142604	-0.630718	-0.00091727	0.234925	0.34462	-0.345883	-0.26634	-1.2371	1.57636	0.838016	-0.0674411	0.496989	0.0954842	0.238591	0.209736	1.16966	2.07511	1.16966
YDL187C		346.415	207.598	159.641	-0.532747	0.606424	-0.993696	-0.392502	0.777946	0.123483	-1.01843	0.69048	-1.47931	-0.833161	1.00546	-0.0207889	0.0615119	1.30377	0.879577	0.508956	0.36319	0.264331	-0.00172103	0.0626621	0.183823	0.163746	-0.129095	-0.208827			-0.809232				-0.537134		-1.07994	0.628968	-1.54082	-0.894673	0.125886	-0.529745	0.179367	0.100586	0.408039	0.271489	1.01108	1.66671	1.01108
YDL188C	PPH22	261.141	157.192	98.601	0.239999	0.460882	0.660176	-0.244528	0.630112	0.324541	0.0650939	0.49945	0.550879	-0.578546	0.762519	0.285191	0.477524	0.210962	0.198187	0.506024	0.512995	0.137772	0.710513	0.00617679	0.381779	-0.0217227	0.695553	-0.280946	0.147361	0.180696	0.145369	0.227618	0.286248	0.488862	0.364453	0.420112	-0.41243	0.0219263	0.0733554	-1.05607	0.564332	-0.220833	0.131216	0.159495	0.3311	0.287122	-0.294189	0.490976	-0.294189
YDL189W	RBS1																						0.0110326				-0.114328				-1.13267				-0.842605										0.728277
YDL190C	UFD2	148.109	92.7363	60.3417	0.00475684	-0.222179	0.1413	-0.187689	0.129869	0.391105	-0.264757	-0.39709	-0.0860598	-0.480744	-0.0595611	0.386491	-0.817266	-1.12236	-1.1257	-0.955408	-0.0632345	0.101543	-0.0574554	0.0748684	-0.379668	-0.0748157	-0.193626	-0.193242	-0.813295	-0.992569	-0.991768	-0.884268	-0.55217	-0.58454	-0.709533	-0.567226	0.552509	0.420176	0.731206	0.336522	1.06614	1.3419	0.316433	0.176358	0.515907	0.268111	0.610693	0.334937	0.610693
YDL191W	RPL35A	405.503	405.728	197.117	2.01962	1.67705	2.242	1.58275	0.743659	0.720861	2.56044	2.09572	2.49263	2.56561	0.949116	0.888329	1.91466	1.16744	0.598064	1.29252	2.16253	2.31119	2.3441	2.07854	2.56152	3.16336	2.58697	2.36498	1.39445	1.09029	2.76635	2.06201	1.37465	1.32104	2.83988	2.04903	0.645781	0.181059	0.57797	0.650956	0.351052	-0.404195	-0.398996	-0.852163	-0.252907	-0.286444	-0.982165	-0.226917	-0.982165
YDL192W	ARF1	354.602	251.88	136.096	1.01281	1.13102	1.85765	1.3606	0.745747	1.02677	1.14871	1.37902	2.02083	2.18336	0.952549	1.35388	1.33662	1.70713	1.41623	1.39361	1.44035	1.98929	1.5885	1.37417	1.60721	2.69161	1.71212	1.46567	0.885153	0.935037	1.4156	0.869896	0.930158	1.179	1.56414	0.990445	-0.187911	0.0424047	0.684209	0.84674	-0.463683	-0.0397338	-0.166864	-0.702325	0.147975	-0.0914965	-0.723943	-1.14789	-0.723943
YDL193W	NUS1	204.654	147.665	88.1981	0.0815807	0.52654	0.208443	0.0623867	0.36868	0.246712	-0.157037	0.585628	-0.00363964	-0.0504433	0.332892	0.166747	-0.051096	0.0968349	-0.129365	-0.0211084	0.36296	0.172737	0.217248	0.302108	0.183519	0.0295177	0.124434	0.0968905	-0.151062	-0.718846	-0.307365	-0.40624	0.0257972	-0.334114	-0.0631386	-0.142745	-0.105941	0.636724	0.0474564	0.000652764	0.462257	0.187855	0.179441	0.14322	0.187573	0.205218	0.140399	0.4148	0.140399
YDL194W	SNF3	74.2836	38.4177	27.0558	-0.184895	-0.590188	-1.59497	-0.615579	0.197331	-0.02994	-0.530682	-0.880114	-2.2174	-1.21701	0.0513043	-0.254275	-1.97412	-1.88525	-0.864787	-1.28983	-0.860432	-1.0062	-1.29976	-1.09365	-1.43311	-1.69817	-1.63201	-1.68517	-2.66784	-2.80097	-2.74622	-2.34386	-2.17073	-2.23901	-2.36655	-1.86332	1.44344	1.09401	-0.243274	0.757117	0.916091	1.03556	0.572677	0.691975	0.734537	0.591521	1.27883	1.15937	1.27883
YDL195W	SEC31	199.383	110.499	69.21	0.868004	0.853549	0.624126	0.147799	0.933991	0.624118	0.945667	1.01484	0.506628	0.0965246	1.2619	0.741101	0.180771	0.150188	0.195663	0.204261	1.00023	0.399099	0.466983	0.693747	1.02563	0.361243	0.413586	0.596923	0.617349	0.174348	-0.299915	0.465827	0.696432	0.483054	-0.0561016	0.631637	0.764896	0.834068	0.325857	-0.0842464	1.06624	0.53684	-0.0253985	0.0378558	0.469687	0.096824	0.210984	0.74038	0.210984
YDL196W		60.0511	46.4329	57.936	-0.304118	-1.21284	-0.088725	0.514829	-0.228884	0.160605	-0.697854	-1.69737	-0.368424	0.728065	-0.64912	0.0357046		0.055112		-0.119546	0.648131	0.170141	-0.864311		0.560353	0.0257125	-1.12783															0.155251	0.0877784	0.144428
YDL197C	ASF2	117.241	80.2809	56.6711	-0.792075	-0.00474908	-0.212573	-0.230427	0.905903	-0.410301	-1.38206	-0.111706	-0.520452	-0.554282	1.21574	-0.833126		-0.0694781	-0.465853	-0.512403	-0.116554	-0.399259	-0.418534	-0.367052	-0.450125	-0.808725	-0.611694	-0.757472	-0.546898	-1.20973	-0.710272	-0.388316	-0.319671	-0.783216	-0.44367	-0.126829					1.68159	-0.320723	0.333572	0.409466	-0.168024	0.390421
YDL198C	GGC1	164.227	97.975	60.0225	0.200466	1.01512	0.374728		0.896187		0.00966136	1.2269	0.200482		1.19977			0.235057	0.751622	0.00835654																					0.448152
YDL199C		90.3311	83.7629	57.3265	-0.17919	-0.679144	-0.128101	-0.585249	0.0962797	-0.164532	-0.522683	-0.996871	-0.416759	-1.16482	-0.11476	-0.459103	-2.31684	-1.57084	-0.963584	-1.79262	-0.555121	-0.88816	-1.78581	-1.51045	-1.02966	-1.52519	-2.19477	-2.21733	-1.8534	-1.83401		-2.64049	-1.45993	-1.35436		-2.12673	1.79416	1.31997	1.90008	1.15202	0.848824	1.33352	0.474541	0.637033		0.70688	-0.566561	-1.05126	-0.566561
YDL200C	MGT1	93.5621	50.1505	25.148	-0.770403	-1.16775	-1.09862		-0.201791	-0.246855	-1.35167	-1.63818	-1.60811		-0.604598	-0.584386		-0.996277	0.000609099	-0.783501			-0.597371				-0.818757				-1.52028				-1.2087						-0.605207	0.199115			0.389941
YDL201W	TRM8	105.085	71.272	30.2962	0.376501	0.309239	-0.13202		0.239249	-0.204658	0.256493	0.300414	-0.42157		0.120189	-0.520169	-0.343588	-0.481679	-0.636723	0.00781915	0.178636	0.383498	0.956853	0.226443	-0.0600521	0.338381	0.980773	0.000283097	-0.910681	-0.911664		-0.478052	-0.637164	-0.510521		-0.206513	0.60008	0.644002	-0.0779821		0.756913	-0.527988	0.238689	0.0451172		0.22616	-0.450006	0.834895	-0.450006
YDL202W	MRPL11	129.478	98.81	45.5675	-1.02589	0.0544061	-0.497196	-0.041788	-0.163222	-0.184547	-1.70991	-0.0340627	-0.869837	-0.229695	-0.541214	-0.489562	-0.227248	0.366025	-0.674323	-0.0492982	0.411892	0.208159	0.0600882	0.335442	0.248179	0.0814269	-0.05753	0.13945	-0.790742	-0.557818	-0.553401	-0.334282	-0.532486	-0.186793	-0.295511	-0.0788473	-1.48266	0.193186	-0.642589	-0.00244642	0.133109	-0.440264	0.163713	0.126732	0.237981	0.195992	0.202325	0.775699	0.202325
YDL203C		136.819	93.6453	68.5539	0.0168159	0.135323	-0.553039	-0.0537705	0.143558	-0.476137	-0.247848	0.0721436	-0.938386	-0.250313	-0.0370651	-0.933318	-0.320087	-0.535807	-0.684028	-0.809246	-0.302684	0.0032315	-0.307955	0.214902	-0.696084	-0.218888	-0.483662	-0.0144511	-0.816374	-1.38238	-0.750978	-0.494444	-0.554857	-0.941169	-0.482115	-0.221069	0.0722386	0.39223	-0.618299	0.069774	0.646963	-0.124072	0.3934	0.222119	-0.00154765	0.229354	0.494227	1.26526	0.494227
YDL204W	RTN2	235.661	127.339	170.405	0.0174069	0.341736	-0.0205717	-0.230338	0.255612	1.62993	-0.24702	0.343067	-0.284763	-0.55413	0.147081	2.2718	-0.904289	-0.694236	0.47926	0.045146	-0.184138	-0.0546922	-0.178303	-0.374014	-0.539434	-0.303773	-0.333547	-0.766362	-0.915496	-1.60424	-1.11491	-1.56071	-0.641366	-1.14415	-0.825839	-1.1679	0.65727	1.24736	0.619526	0.350159	-0.332179	2.22665	0.355296	0.249081	0.492292	0.392348	1.60713	-0.951705	1.60713
YDL205C	HEM3	227.03	118.691	55.0696	-0.282946	-0.488135	0.784649	0.286053	0.777795	0.835628	-0.668166	-0.746166	0.703675	0.334415	1.00521	1.06299	0.359982	-0.221196	0.246396	0.485326	0.916137	0.489354	0.7382	0.425912	0.914504	0.493509	0.727609	0.25496	0.146588	0.235299	0.334903	0.1338	0.285573	0.538817	0.54346	0.336803	-1.02815	-1.10615	0.343693	-0.0255672	0.758818	0.577661	0.00163324	-0.00415499	0.184149	0.170952	0.233968	0.415126	0.233968
YDL206W		56.6444	26.9051	18.3326	-1.06378	-0.265093	-0.573191	-0.551257	0.0489606	-0.00417861	-1.76304	-0.453416	-0.963124	-1.10633	-0.192522	-0.21507	-2.18594	-2.23951	-2.09604	-1.83012	-0.75279	-0.717156	-1.01165	-1.02018	-1.29087	-1.27459	-1.29842	-1.59136	-2.07275	-2.54073	-2.57753	-2.42777	-1.65136	-2.00092	-2.20723	-1.93783	0.422908	1.73253	1.22282	1.07962	1.90352	1.61505	0.538078	0.557436	0.90881	0.571186	0.392229	0.680701	0.392229
YDL207W	GLE1	115.553	84.2254	50.7545	-0.14639	-0.154372	-0.575516	0.0218879	-0.203854	-0.560864	-0.476691	-0.308091	-0.965978	-0.120129	-0.607987	-1.06226	0.228238	-0.683289	-0.768289	-0.709927	-0.27134	-0.0599059	-0.421763	-0.156899	-0.654665	-0.311414	-0.615433	-0.489155	-0.505751	-0.843343	-0.734147	-0.168312	-0.283759	-0.448015	-0.466219	0.0685319	-0.704928	-0.536328	-1.19422	-0.348366	0.160302	-0.352332	0.383325	0.251508	-0.149214	0.332257	0.841884	1.35452	0.841884
YDL208W	NHP2	94.5312	92.7949	39.1814	0.976972	-0.668038	0.293864	0.78243	-0.574784	-0.0993485	1.09846	-0.982295	0.101218	1.18852	-1.21756	-0.359904	1.72408	0.60818	0.157593	1.07551	1.72489	1.40899	1.14269	1.09225	1.98322	1.8412	1.19594	1.10572	0.61918	0.719739	1.69737	1.62243	0.69803	0.982023	1.83026	1.65868	-0.625623	-2.70638	-1.62286	-0.535561	-1.37515	-1.43542	-0.258325	-0.432214	-0.634321	-0.0134697	0.187447	0.247712	0.187447
YDL209C	CWC2	133.376	91.0674	54.5033	0.568745	0.201353	1.06016	0.260318	-0.243874	-0.155611	0.526054	0.15881	1.04188	0.290133	-0.673755	-0.445526	0.950342	0.252492	0.0231246	0.157276	0.316544	0.293156	0.564271	0.396624	0.122184	0.205987	0.526229	0.217565	-0.0645984	-0.337397	0.442769	0.421819	0.101259	0.0148672	0.645337	0.592559	-0.424289	-0.791533	0.0915368	-0.66021	-0.69688	-0.602802	0.194361	0.0871688	-0.119108	0.179059	-0.694339	-0.788416	-0.694339
YDL210W	UGA4	44.1567	25.7957	13.1512	0.0926361	-0.497628	-0.603308	-0.355935	0.162645	-0.098379	-0.141535	-0.758626	-1.00009	-0.770242	-0.00569872	-0.358429	-1.3393	-1.4042	-1.15914	-1.36309	-0.67952	-0.986895	-0.726227	-0.381274	-1.19405	-1.66989	-0.967951	-0.775632	-2.18941	-2.05529	-2.10699	-2.21831	-1.75318	-1.5568	-1.76282	-1.75183	1.19777	0.580677	0.33921	0.569061	1.15344	1.00466	0.514527	0.682991	0.794864	0.394357	0.665449	0.814232	0.665449
YDL211C		95.5182	71.9106	39.1545	-0.269427	-0.105698	0.310322	0.0585908	0.01147	-0.490855	-0.64921	-0.244205	0.121421	-0.0569749	-0.254133	-0.955716	-0.455157	-0.447984	-0.660727	-0.537856	0.242264	0.10277	0.126529	0.564947	0.0240276	-0.0730177	0.0193968	0.432475	-0.943142	-0.877177	-0.557727	-0.87282	-0.665494	-0.478969	-0.299596	-0.557061	-0.194053	0.210952	0.576578	0.398182	0.406594	-0.41786	0.218237	0.175787	0.318993	0.132472	-0.994438	-0.169984	-0.994438
YDL212W	SHR3	83.192	56.5181	33.7311	-0.898177	-0.185396	-0.772726	0.27424	-0.243841	0.214341	-1.53083	-0.348811	-1.20806	0.314089	-0.673701	0.117484		0.329281	0.300896	0.344225	0.627495	0.172119	0.152244	1.4106	0.533083	0.0286116	0.0491706	1.51218	-0.743108	-0.687105	-0.627343	-0.589124	-0.490914	-0.305075	-0.365346	-0.305143					-0.974596	-0.226742	0.0944116	0.143507	0.414517	-0.10158
YDL213C	NOP6	34.3798	34.2519	15.4519	-0.814643	-1.15984	-1.30064	-0.141115	-0.641104	-0.983173	-1.4137	-1.62781	-1.8561	-0.400605	-1.32655	-1.70495	0.389739	-0.826203	-0.110385	-0.38783	0.41173	0.3184		-0.497677	0.247965	0.242981		-0.924251	-0.596992	-0.432535	-0.0899878	0.63421	-0.36339	-0.0721737	0.142167	0.78116	-1.80344	-2.01755	-2.24584	-0.790344	-1.21616	-1.31712	0.163765	0.0754186		0.426574	0.928719	1.02968	0.928719
YDL214C	PRR2																						-1.27825				-1.6071
YDL215C	GDH2	498.09	162.691	159.262	0.08332	0.914885	-0.787096	-0.0583232	0.882502	0.196375	-0.154598	1.09534	-1.2257	-0.258147	1.17729	0.0901415	0.111744	-0.0612063	0.429984	0.142145	0.338833	0.366687	0.257454	-0.254453	0.151636	0.313744	0.170987	-0.613709	-0.110647	-0.744134		-0.0239832	0.0610696	-0.35725		0.196693	-0.266342	0.983601	-1.33744	-0.36989	0.747302	-0.0520037	0.187196	0.0529426		0.359257	1.28544	2.08475	1.28544
YDL216C	RRI1	141.834	89.3287	40.6651	-0.935634	-1.24571	-0.493843		0.282432	-0.220447	-1.58335	-1.7405	-0.865721		0.191156	-0.544197	-0.186111	-0.54597	-0.696532	-0.810094	0.774567	-0.135217	-0.298227	0.8468	0.727429	-0.42178	-0.472399	0.792336	-0.399617	-0.52646	-0.782611	-0.788291	-0.19113	-0.158104	-0.511992	-0.482001	-1.39724	-1.55439	-0.67961		0.887688	0.265897	0.0471381	0.286563	0.0395929	0.0544636	0.945507	1.5673	0.945507
YDL217C	TIM22	222.049	107.13	50.5424	0.627126	1.45479	0.290476	0.0727434	-0.218722	-0.169622	0.607913	1.80399	0.0970591	-0.0326228	-0.63242	-0.46685	-0.216719	0.652516	0.31541	0.590831	0.79906	0.464917	0.481515	0.43903	0.759795	0.457698	0.430411	0.271708	-0.756263	-0.581025	-0.365316	-0.118141	-0.502395	-0.208024	-0.117871	0.113082	0.824632	2.02071	0.313778	0.184096	-0.94783	-1.05768	0.0392652	0.00721924	0.548282	0.167322	-1.37146	-1.26161	-1.37146
YDL218W		71.3269	42.8289	43.3496	-0.108831	-0.232162	-0.108998	-0.882525	-0.275489	-1.01001	-0.424028	-0.410193	-0.39331	-1.67633	-0.72571	-1.7458	-1.64563	-1.415	-1.51525	-0.973646	-1.09515	-0.574667		-0.568077	-1.74328	-1.06578		-1.01414				-2.19125				-1.72781	1.2216	1.23543	1.25232	-0.0307088	0.78954	-0.772152	0.648123	0.491112		0.446058	-2.02447	-0.462776	-2.02447
YDL219W	DTD1	120.453	84.9171	42.5881	-0.970586	-0.150847	0.252538	-0.421188	0.33253	-0.388081	-1.63236	-0.303465	0.0504889	-0.882521	0.273484	-0.799311	-0.875741	-0.1515	-0.126877	-0.0884021	-0.0859432	0.30416			-0.409676	0.222114			-0.802629	-1.05079		-0.692988	-0.542861	-0.637802		-0.397373	-0.756617	0.572276	0.92623	-0.0067804	0.400361	-0.710909	0.323733	0.0820465			-1.63714	-0.525869	-1.63714
YDL220C	CDC13	89.4725	64.2269	41.0382	0.219214	-0.38754	-0.390433	-0.53112	-0.087219	-0.33154	0.03595	-0.614131	-0.738782	-1.07168	-0.416314	-0.713264	-0.563882	-1.26181	-1.11287	-1.48697	-0.567454	-0.722325	-0.760739	-0.0324577	-1.04596	-1.28217	-1.00791	-0.330273	-1.53349	-1.6644	-1.24548	-1.46898	-1.18072	-1.19918	-0.94915	-1.08644	0.599832	-0.0502493	-0.1749	-0.507798	0.69656	0.773711	0.478505	0.559842	-0.0587598	0.297815	0.948611	0.87146	0.948611
YDL221W		191.251	155.123	114.905	0.538137	-0.457025	1.03679	-0.977876	-0.24793	0.166424	0.483135	-0.705333	1.01319	-1.8404	-0.68042	0.0445609	0.209802	0.902918	1.52714	0.528501	-0.285508	-0.551683		-1.15057	-0.673387	-1.0321		-1.75785	-0.197885	-0.601424		-0.26405	-0.0150678	-0.226687		-0.0164825	0.273333	-0.915135	0.803387	-2.05021	-2.20756	-0.48394	0.387879	0.480414		0.607275	-1.28733	-3.01095	-1.28733
YDL222C	FMP45	156.434	211.849	108.157	-0.557088	-0.404757	-0.564518	-0.910333	0.214791	0.556602	-1.05256	-0.63673	-0.952477	-1.72418	0.0799962	0.638353	-1.88451	-0.595218	0.635207	-0.295378	-0.800663	-1.39744	-1.68935	-0.748299	-1.35413	-2.27152	-2.08308	-1.24424	-1.31812	-1.58063		-2.40197	-0.992755	-1.12255		-1.91492	0.831952	1.24778	0.932037	0.16033	-0.555211	0.933731	0.553465	0.874086		0.495938	0.00169378	-1.48725	0.00169378
YDL223C	HBT1	174.279	145.67	140.493	0.382475	0.497697	-0.629627	-0.448146	-0.257395	-0.388008	0.26487	0.547771	-1.0324	-0.928907	-0.695974	-0.799199	-0.254281	-0.0607978	0.20389	0.317881	-0.714889	-0.317836	-0.700299	-0.851461	-1.24078	-0.689402	-0.93793	-1.37595	0.0195951	-0.38751	-0.58913	-0.54234	0.174739	-0.0309806	-0.329256	-0.263599	0.51915	0.802052	-0.77812	-0.674626	-0.899864	-1.11708	0.525895	0.371566	-0.608675	0.52449	-0.338961	-0.121744	-0.338961
YDL224C	WHI4	151.662	98.7836	57.4118	0.235525	0.268655	0.703869		1.21299	0.68756	0.0588204	0.247146	0.604515		1.7204	0.83765	0.0475292	-0.437121	-0.59725	-0.764744	0.489093	0.474224	0.733613	0.543726	0.350194	0.471337	0.722299	0.405381	-1.43176	-1.26988	-0.354937	-0.926352	-1.09194	-0.838249	-0.108068	-0.604596	0.0112913	0.199617	0.556985		2.31765	1.60239	0.138898	0.00288734	0.830367	0.138345	1.04541	1.76067	1.04541
YDL225W	SHS1	125.1	89.453	44.6536	-0.0925859	-0.209603	-0.292648	-0.173753	-0.412684	-0.312232	-0.401249	-0.380583	-0.618747	-0.456765	-0.951169	-0.683879	-0.108737	-0.434715		-0.719913	-0.343661	0.116042	-0.0629714	-0.797566	-0.750232	-0.0535678	-0.200012	-1.30714	-0.235192	-0.13978	-0.442823	-0.208524	-0.0476274	0.195663	-0.191074	0.0328242	-0.292512	-0.271846	-0.51001	-0.348028		0.0360341	0.406571	0.16961	-0.00893875	0.509574	0.546044		0.546044
YDL226C	GCS1	196.674	143.942	76.6028	-0.0132565	0.507673	0.871259	0.167597	0.356555	0.0444578	-0.290015	0.560865	0.809992	0.13059	0.312965	-0.141053	1.08555	0.913784	0.589664	0.51952	0.62661	0.395392	0.623881	0.125471	0.531914	0.35581	0.595247	-0.128634	0.620657	0.12106		0.791098	0.699318	0.434302		0.920474	-1.37557	-0.524689	-0.275563	-0.954964	-0.276699	-0.660573	0.094696	0.0395813		0.254105	-0.38501	-0.00113583	-0.38501
YDL227C	HO																						0.714005				0.699595				0.406518				0.611099										0.0884966
YDL228C
YDL229W	SSB1	1372	445.267	132.789	0.814856	0.321115	1.19733	0.782553	0.0894282	0.173217	0.871143	0.316002	1.21026	1.18873	-0.126019	0.0548985	0.766468	0.298801	-0.605316	0.121907	1.17017	0.583024		1.26464	1.25019	0.630779		1.32582	1.81079	0.567227		1.97431	1.73801	0.842493		1.97115	0.104675	-0.450467	0.443792	0.422265	0.479297	-0.0670081	-0.0800194	-0.0477555		-0.0611824	-0.5108	0.0355049	-0.5108
YDL230W	PTP1	189.704	137.389	82.3248	-0.318934	0.260884	0.272503	-0.250568	0.134042	0.0353022	-0.718629	0.236946	0.0749964	-0.588938	-0.0527029	-0.154986	0.486899	0.383882	0.543089	0.257939	-0.0950078	-0.438871	0.502348	0.11659	-0.421654	-0.866775	0.454533	-0.139973	-0.089081	-0.422835	0.409189	0.198199	0.0798915	-0.0632987	0.613621	0.393988	-1.20553	-0.249953	-0.411903	-1.07584	-0.595792	-0.412925	0.326646	0.427904	-0.159089	0.256563	-0.0010227	-0.18389	-0.0010227
YDL231C	BRE4	259.718	178.398	122.827	-0.0768709	0.0580459	1.2539	-0.363534	0.479354	0.403894	-0.379213	-0.0292853	1.2797	-0.783318	0.514768	0.405955	-0.0414622	0.125774	0.114907	0.427644	0.446481	0.329495	0.587608	0.431791	0.293886	0.259241	0.553249	0.262466	0.258048	-0.0363849	0.422314	0.365394	0.38285	0.290258	0.626018	0.542455	-0.337751	0.0121769	1.32116	-0.741855	0.399861	-0.0216899	0.152595	0.070254	-0.0727685	0.169325	-1.34285	-0.921298	-1.34285
YDL232W	OST4				0.268723	0.527119	0.309677											1.77975	2.14797	1.61256			0.200283				0.104792
YDL233W		173.04	97.4678	50.2333	-0.900202	-1.58871	-0.113779	0.979285	0.598423	0.0275282	-1.53367	-2.1907	-0.399178	1.52725	0.710442	-0.166817	-0.978673	0.00613012	-0.349447	-0.356926	-1.2821	-0.480668	-0.917713	-0.141679	-1.99032	-0.928027	-1.18966	-0.469724	-1.00741	-1.27329	-1.24184	-1.84718	-0.721588	-0.841369	-0.945717	-1.42228	-0.554995	-1.21203	0.579495	2.50592	1.05989	0.190108	0.708216	0.447359	-0.243941	0.328044	-0.389387	0.480394	-0.389387
YDL234C	GYP7				-0.806708	-0.385561	-0.319372	0.111103	0.458834	-0.178518	-1.40257	-0.611534	-0.651551	0.0333818	0.481047	-0.480388		-0.430014	-0.333577	-0.407718		-0.912774	-0.779968			-1.56126	-1.03017		2.58883	1.09955	-0.610922	-1.27662	2.41705	1.32951	-0.349837	-0.915631					0.814624	-0.0726707		0.64849	-0.680336
YDL235C	YPD1	493.663	324.705	132.643	-0.101507	-0.0605637	-0.283875		0.923401	0.166195	-0.413757	-0.184964	-0.607978		1.2445	0.0442132	-0.039626	0.587263	0.652607	1.00816	1.14473	1.20046	0.225971	0.799584	1.21657	1.53562	0.134535	0.732052	0.461018	0.251883	-0.0897897	-0.142934	0.559993	0.553989	0.142354	0.0910668	-0.374131	-0.145338	-0.568352		0.59189	-0.963951	-0.0718423	-0.335154	-0.00781896	0.0675315	-0.395599	1.16024	-0.395599
YDL236W	PHO13	186.195	113.394	62.6073	0.649808	0.502587	0.72776	0.419257	0.695201	-0.236413	0.639717	0.55419	0.633842	0.563617	0.869483	-0.568495	0.34046	0.638838	0.00567189	0.503144	0.888331	0.641374		0.655018	0.87776	0.716289		0.547475	0.753983	0.896406		0.126599	0.81568	1.14365		0.330408	0.299258	0.21373	0.293382	0.223157	0.863811	-1.07164	0.0105709	-0.0749154		0.107543	-1.36502	0.570429	-1.36502
YDL237W		129.005	82.3637	40.8425	-0.319208	0.318522	-0.602209	-0.410253	-0.065285	-0.041711	-0.719012	0.312599	-0.998745	-0.863705	-0.380269	-0.272189	0.0400766	0.0792298	-0.127232	-0.228722	-0.567593	-0.462491	-0.853851	-0.580357	-1.04614	-0.901389	-1.11572	-1.02981	0.263909	0.110492	-1.17859	-0.226619	0.387965	0.424633	-0.885978	0.0167558	-0.759089	0.272522	-1.03882	-0.903782	-0.253037	-0.043467	0.47855	0.438898	-0.229739	0.449457	0.995354	0.785784	0.995354
YDL238C	GUD1	162.617	109.804	69.6716	-0.514366	-0.26273	0.0283462	-0.431324	0.496646	-0.0024878	-0.992658	-0.450314	-0.224715	-0.899963	0.543185	-0.212497	-0.475937	-0.267877	-0.105371	-0.644068	-0.467431	-1.25271	-1.52355	-0.425998	-0.913786	-2.05944	-1.89111	-0.832733	-0.480522	-0.333367	-2.05061	-1.19604	-0.26174	0.0185538	-1.70957	-0.844079	-0.516721	0.0256228	0.251223	-0.424025	0.648556	0.431571	0.446355	0.806721	-0.181544	0.406735	0.180349	0.397333	0.180349
YDL239C	ADY3	41.2304	30.6978	27.2224	-1.05755	-0.230161	-0.239317	-0.245151	0.744502	-0.0868408	-1.75429	-0.407566	-0.553281	-0.579617	0.950502	-0.340869	-1.47795	-1.77218		-1.52419	-0.704053	-1.00404			-1.22646	-1.69501			-2.12615	-1.40225		-2.23331	-1.69797	-0.959347		-1.76516	-0.276338	1.07039	0.924672	0.898336		1.18332	0.522412	0.690973			0.258649		0.258649
YDL240C-A
YDL240W	LRG1				0.143309	-0.311601	-0.640057															-0.13737							-0.227426	0.831064			-0.0408493	1.08387
YDL241W		131.393	110.025	14.2797	-0.200718	0.583683	0.343875	0.433425	0.459915	-1.19578	-0.552868	0.660632	0.162609	0.587995	0.482823	-2.02851	0.878935	1.06032		0.241188	0.787239	0.107672	-0.364241		0.744174	-0.0658338	-0.548832		2.20138	0.625831	0.27219	0.194836	2.0789	0.896108	0.484231	0.391001	-1.4318	-0.218304	-0.716326	-0.290941		-2.26969	0.043065	0.173506	-1.03306		-1.55337		-1.55337
YDL242W		108.638	64.6744	22.4148	-0.79867	-0.511411	0.240194	-0.165285	0.0731633	-0.809301	-1.3913	-0.776716	0.0353363	-0.442194	-0.152749	-1.44034	-1.07494	0.304911	-0.942532	0.216858	0.0938348	0.554622	-0.452956		-0.172112	0.589157	-0.651549		-1.06774	-0.987853			-0.774235	-0.580225			-0.316362	0.298223	1.11028	0.632745	0.789783	-1.6572	0.265946	-0.0345352			-2.76748	-0.320493	-2.76748
YDL243C	AAD4	371.791	322.803	215.429	0.0126935	0.1613	0.34477	-0.324974	-0.0375881	-0.16963	-0.253629	0.10624	0.163707	-0.716968	-0.334753	-0.466862	0.140733	-0.145251	0.0394679	-0.21752	0.129707	0.153234	-0.167049	0.0427501	-0.124709	0.000935857	-0.320516	-0.23425	-0.806751	-0.86307	-0.704506	-0.327109	-0.546458	-0.466063	-0.438223	-0.0724777	-0.394362	-0.0344936	0.0229738	-0.857701	-0.374221	-0.249342	0.254416	0.152298	0.117707	0.277	-0.272316	-0.397195	-0.272316
YDL244W	THI13	174.568	124.656	83.98	-0.262898	-0.0248298	-0.362206	-0.685114	-0.404706	-0.795869	-0.640055	-0.138062	-0.704132	-1.33665	-0.938059	-1.4199	-1.17194	-0.498492	-0.0210707	-0.311428	-0.704245	-1.07907		-1.37202	-1.22672	-1.80497		-2.04059	-1.2817	-1.50156		-1.49793	-0.960976	-1.05021		-1.11215	0.531885	1.03388	0.467808	-0.164713	-0.916989	-1.10847	0.522474	0.725898		0.668566	-1.57628	-1.3848	-1.57628
YDL245C	HXT15	38.9317	25.1839	15.3781	-0.68892	-1.17502	-1.22545	-0.550468	0.19629	-0.72028	-1.23741	-1.64773	-1.7638	-1.10497	0.0495931	-1.30487	-2.42207	-1.9003	-1.75341	-2.04588	-0.352411	-0.583275	-1.47497	-1.15149	-0.761795	-1.07839	-1.83487	-1.75901	-1.69976	-1.79906	-3.03452	-2.93858	-1.32584	-1.32239	-2.63884	-2.39143	1.18466	0.774339	0.65827	1.3171	1.80301	0.741018	0.409384	0.495119	0.803965	0.607528	0.0827486	1.14474	0.0827486
YDL246C	SOR2	78.5518	58.1221	42.8091	-0.0647159	-0.330633	-0.0847711	-0.668657	-0.498962	-0.742245	-0.36217	-0.53944	-0.36357	-1.30834	-1.09296	-1.33829	-0.896926	-0.70484	-0.431646	-0.531379	-0.125944	-0.638176	-0.110951	-0.70293	-0.462535	-1.15885	-0.255564	-1.18631	-0.940138	-1.42431	-1.25009	-1.20434	-0.662872	-0.979529	-0.953512	-0.851443	0.534756	0.357486	0.533356	-0.41141	-0.66131	-0.806914	0.33659	0.520674	0.697948	0.483382	-1.34027	-1.19467	-1.34027
YDL247W	MPH2	71.2456	47.3127	34.6194	-0.444585	-1.35885	-0.922787	-0.728343	-0.14774	-0.433336	-0.894813	-1.88901	-1.39227	-1.41104	-0.515773	-0.868181	-1.61877	-1.56683	-1.39344	-1.24384	-0.442098	-0.0646578	-1.15402	-0.751964	-0.88031	-0.318377	-1.46327	-1.24892	-1.16062	-1.25098	-2.06259	-1.73681	-0.855299	-0.820959	-1.72089	-1.32428	0.723956	-0.270239	0.226504	0.207733	0.877667	0.375664	0.438212	0.253719	0.25762	0.496953	0.14916	0.651163	0.14916
YDL247W-A
YDL248W	COS7
YDR001C	NTH1	561.693	234.728	254.002	-0.585161	-0.695274	-0.366374				-1.09192	-1.01804	-0.709249					-0.441335		-0.0886185									0.194994				0.327819
YDR002W	YRB1	278.072	248.874	209.053	1.08889	0.238499	-0.519844	0.350492	-0.30348	0.257838	1.25539	0.207565	-0.897638	0.445295	-0.771709	0.183678	1.81324	1.82375	1.12724	2.05844	0.627756	0.816662	0.619548	1.10702	0.533428	0.973169	0.59023	1.12458	1.78909	1.23175	1.97091	1.95375	1.71908	1.45046	2.08862	1.95289	-0.557843	-1.60567	-2.71088	-1.36794	-1.89895	-1.87477	0.0943278	-0.156507	-1.49839	-0.0175581	0.836111	0.811926	0.836111
YDR003W	RCR2	353.51	268.608	205.634	-0.506865	-0.287234	1.23228	-0.144269	0.114766	0.417828	-0.982141	-0.482477	1.25316	-0.406031	-0.0843798	0.427159	-0.06222	1.55867	1.28274	0.760625	0.152935	-0.218049	-0.524845	-0.558332	-0.0940149	-0.543166	-0.734784	-1.00169	-0.0119639	-0.380355	-0.347357	-0.275661	0.147196	-0.0244353	-0.100909	-0.0267924	-0.919921	-0.420257	1.31538	-0.343811	-1.36712	-0.333466	0.24695	0.325118	-0.633875	0.443361	-1.64885	-2.6825	-1.64885
YDR003W-A
YDR004W	RAD57	157.37	96.4515	59.1018	-0.420997	0.198489	0.588914		0.57481		-0.861738	0.155051	0.463403		0.671637		-0.326013	-0.28422	-1.18746	-0.600493	-0.837091	0.105532	0.0979796	-0.252684	-1.40226	-0.0689703	-0.0136582	-0.611451	-1.49961	-1.26515	-0.780101	-1.3602	-1.15115	-0.83392	-0.50962	-0.989848	-0.535725	0.481064	0.789417		1.8591		0.565174	0.174502	0.495962	0.358767		1.06968
YDR005C	MAF1	250.987	143.396	84.6403	0.0238764	0.06442	0.320975	0.00159967	0.987577	-0.308043	-0.237948	-0.0209191	0.134497	-0.155038	1.34996	-0.677505	0.330754	0.294233	-0.890635	-0.00343276	0.00788164	0.154822	-0.317126	-0.075501	-0.285693	0.00326275	-0.494281	-0.385229	0.129539	-0.276799	0.154744	-0.573338	0.270693	0.0703071	0.373307	-0.291125	-0.568703	-0.351674	-0.196257	-0.485793	2.2406	-0.674073	0.293574	0.151559	-0.867588	0.309728	-0.477816	2.43685	-0.477816
YDR006C	SOK1	202.526	141.78	102.719	-0.0545917	0.604231	0.236105	0.0986145	0.286578	0.372452	-0.347974	0.687601	0.0303165	0.0118932	0.197968	0.358105	0.381665	-0.764106	-0.798351	-0.709834	0.310814	0.463459	0.411962	0.248402	0.114612	0.455562	0.349881	0.02832	0.246556	0.0945259	0.558871	0.104007	0.37282	0.410026	0.754991	0.310347	-0.729639	0.305936	-0.351349	-0.369772	0.996319	1.06794	0.196202	0.00789787	-0.40511	0.220082	1.41929	1.34767	1.41929
YDR007W	TRP1	1959.72	1292.4	1518.16	-0.552051	-2.71452	-0.261744	0.08135	0.478724	0.754365	-1.0455	-3.66837	-0.58081	-0.0178136	0.513734	0.939317	-0.696337	0.875601	1.04049	1.4096	0.696973	0.426798	0.221792	0.265143	0.624894	0.401835	0.129696	0.0496945	-1.31124	-1.34296	-0.837959	-0.743941	-0.986754	-0.905106	-0.564265	-0.442619	-0.349162	-2.97203	0.115527	0.678524	-0.526761	-0.470283	0.0720791	0.0249626	0.693961	0.215448	-0.58581	-0.642288	-0.58581
YDR008C		1322.65	733.648	688.788	-0.90061	-0.512887	0.231155	-0.123492	0.607695	1.26916	-1.53424	-0.778654	0.0242404	-0.370282	0.725679	1.72276	0.0141489	0.856855	0.318143	1.43228	0.30131	0.536156		0.162672	0.102052	0.562096		-0.0811374	-0.867442	-0.823038		-0.660498	-0.599427	-0.429438		-0.368523	-1.54839	-0.792803	0.0100915	-0.38443	0.407536	0.290482	0.199258	-0.02594		0.243809	0.28039	0.397445	0.28039
YDR009W	GAL3	63.4656	39.7768	28.9929	-0.0264422	-0.705895	-0.487725	-0.426295	0.666194	1.45526	-0.308504	-1.03198	-0.858211	-0.891309	0.821814	2.00598	-1.33492	-0.79141	0.184667	-0.0459253	-0.597345	-0.738779	-0.312777	-0.319726	-1.08546	-1.30628	-0.489245	-0.697049	-1.54428	-1.61229	-1.76982	-2.35557	-1.19014	-1.15151	-1.44437	-1.87372	1.02642	0.302939	0.476711	0.443613	0.637147	2.0519	0.488113	0.567501	0.955129	0.377323	1.57519	0.160436	1.57519
YDR010C		132.98	94.0449	59.8041	-0.882353	-1.20861	0.104283	-1.31786	-0.0662187	1.44839	-1.50864	-1.69181	-0.1315	-2.42541	-0.381803	1.99552	-1.4682	0.317837	1.10597	2.20541	-0.734568	-0.692004	-0.895467	-0.870107	-1.26679	-1.23773	-1.1639	-1.39976	-1.81921	-1.52855			-1.43009	-1.0749			-0.0404372	-0.223609	1.3367	-0.957205	-1.48778	-0.209884	0.532221	0.545729		0.529651	-1.54659	-2.82448	-1.54659
YDR011W	SNQ2																						1.77422				1.92715				1.29326				1.4486										0.478553
YDR012W	RPL4B	394.641	358.696	203.789	2.11581	1.48511	2.02494	1.38203	1.1775	1.15445	2.69531	1.84378	2.22618	2.22024	1.66207	1.54818		1.47011	1.53449	1.70783	2.23005	1.96277	2.01347	2.00823	2.65075	2.65276	2.20415	2.27522	1.3179	2.16255	2.1019	2.09496	1.30784	2.30203	2.21233	2.07828					0.12758	-0.159651	-0.420699	-0.689984	-0.00817398	-0.266986
YDR013W	PSF1	143.087	85.6803	29.6329	-1.3578	0.12166	0.992844	-0.320645	0.459434	0.05255	-2.17529	0.0542101	0.959242	-0.709518	0.482032	-0.128738				0.20897	0.233972	0.359326	0.407158		0.0130696	0.302958	0.344318		-0.981946	0.254955	-0.238984		-0.699361	0.5568	0.00144527							-0.337708	0.220902	0.0563684	0.342873
YDR014W	RAD61	125.014	65.4548	35.4817	-0.477568	-0.617625	0.482018				-0.941061	-0.916126	0.332185					-1.60329	-1.20544	-2.08005	-0.238951	0.211908		0.0421391	-0.611865	0.0869206		-0.23503	-1.64639			-2.16718	-1.27926			-1.70643							0.372914	0.124987		0.277169
YDR014W-A	HED1																						-0.739652				-0.983494
YDR015C		23.7679	12.0769	7.73208	-1.08008	-0.76759	-0.73854	-1.03102	-0.849092	-0.971247	-1.78589	-1.11296	-1.1661	-1.93184	-1.66835	-1.6868	-2.27963	-0.593332	0.147977	-0.406946	-1.05691	-0.719616	-0.408474	-0.814897	-1.69275	-1.2782	-0.600047	-1.32927		-2.66836				-2.1177			0.493744	1.16667	1.11354	0.347792	-1.81632	-1.27985	0.635833	0.558582		0.514371	-2.39339	-2.92986	-2.39339
YDR016C	DAD1	681.725	351.506	219.859	-0.652617	0.0524385	0.697927		-0.0984778	0.345474	-1.18651	-0.0366452	0.59722		-0.434817	0.317047		1.09152	1.39798	1.13722	0.668797		-0.0285183		0.587661		-0.160121														-1.8328	-0.82017	0.0811359
YDR017C	KCS1	806.767	421.519	243.618	-0.153895	0.135123	-0.0679427	0.275204	0.592083	-0.0582929	-0.487215	0.0718811	-0.342913	0.315747	0.700023	-0.297424	0.793884	0.0574348	-0.0643042	0.510583	0.0374744	0.191917	-0.711882	0.312917	-0.246588	0.0576255	-0.951342	0.110691	0.878098	0.373447	0.809386	0.762785	0.924001	0.665207	0.991593	0.895332	-1.2811	-0.722003	-1.1368	-0.478137	0.764328	-0.808006	0.284062	0.134292	-1.94294	0.202226	0.328791	1.90112	0.328791
YDR018C		146.683	91.3525	56.4922	0.254214	0.658406	0.341107	-0.304541	0.545607	0.308501	0.085026	0.758708	0.159211	-0.68181	0.623647	0.260781	-0.578221	-0.564173	0.213149	-0.168644	0.0552507	0.00764655	0.15319	0.424572	-0.223098	-0.212418	0.050266	0.253248	-1.24723	-1.43022	-0.944282	-1.49877	-0.930892	-0.984938	-0.664684	-1.11289	0.663247	1.33693	0.737432	-0.103589	0.410497	0.429424	0.278349	0.220064	0.71495	0.171323	-0.308007	-0.326934	-0.308007
YDR019C	GCV1	130.037	85.7914	56.9453	0.50044	0.495109	0.715634	-0.238962	0.953636	-0.0872061	0.430277	0.544375	0.618957	-0.568969	1.29418	-0.341425	0.179455	0.485175	0.387744	-0.0571683	0.247591	0.876328	0.731324	0.277584	0.031067	1.06061	0.719648	0.0655791	-0.143604	-0.311766	0.292909	-0.0793806	0.0323066	0.038316	0.503799	0.147501	0.250822	0.36492	0.439501	-0.748424	0.90644	-0.284257	0.216524	-0.184279	0.21585	0.212005	-0.723758	0.466938	-0.723758
YDR020C		86.0984	76.2491	29.4933	-0.341984	0.802885	0.497895	-0.589306	-0.230742	-0.532114	-0.750949	0.948341	0.351674	-1.1718	-0.652175	-1.01851	-0.104827	0.158099	-0.474303	0.359231	-0.323819	0.486772	0.22629	0.143591	-0.724012	0.489726	0.134904	-0.105499	-0.823958	-0.515215	0.00891518	0.148321	-0.561476	-0.147817	0.235577	0.349697	-0.646122	1.05317	0.456502	-1.06697	-0.177872	-1.37774	0.400193	-0.00295349	-0.100673	0.24909	-1.83424	-0.634373	-1.83424
YDR021W	FAL1	84.8723	82.5975	51.947	-0.238654	0.0598687	0.199324	-0.066963	0.27712	-0.731264	-0.606062	-0.0268928	-0.0148337	-0.273013	0.182426	-1.32158	-0.119857	-1.09529	-1.91198	-0.871886	-0.369273	-0.109946	0.513433	0.383609	-0.784077	-0.384746	0.467367	0.200948	-1.25458	-1.45239	0.00510439	-0.210978	-0.937306	-1.00522	0.231978	0.0306452	-0.486206	0.0929637	0.105023	-0.153156	2.0944	-0.449696	0.414804	0.2748	0.235389	0.182661	-0.554719	1.98938	-0.554719
YDR022C	CIS1	362.384	188.468	91.1969	0.597808	0.308415	-0.889996	-0.157554	-0.0806694	-0.35394	0.566804	0.299332	-1.35201	-0.42889	-0.405551	-0.747354	-0.853623	0.296857	0.658051	0.101591	-0.685603	-0.616724	-0.804414	-1.03321	-1.20208	-1.12741	-1.05848	-1.608	-0.684275	-1.26695	-0.56319	-0.643954	-0.439567	-0.835565	-0.304756	-0.353832	1.42043	1.15295	-0.498391	0.424732	-1.0636	-0.848945	0.516482	0.510689	-0.753722	0.574793	-0.350553	-0.56521	-0.350553
YDR023W	SES1	164.258	147.068	32.9479	0.213898	0.448525	0.387478	1.80695	1.23732	0.114168	0.0284959	0.483232	0.216132	2.9514	1.76038	-0.0349649	1.0097	0.319814	-0.42076	-0.0997757	1.14191	1.17963	1.35505	1.39306	1.21285	1.50509	1.44182	1.48979	-0.177989	0.223985	1.64273		0.00229712	0.528466	1.77866		-0.981205	-0.526469	-0.793568	1.9417	2.18114	0.0648109	-0.0709384	-0.325458	-0.336842	-0.0967257	0.858379	2.97471	0.858379
YDR024W	FYV1	93.5905	76.6204	11.8322	0.27054	0.0412709	0.952819	0.81845	-0.259233	-0.610272	0.107918	-0.0513031	0.91011	1.2505	-0.698995	-1.13745		-1.28111	-0.569688	0.0128336	0.943095	1.15506	1.15943	0.862438	0.950127	1.46907	1.21533	0.812302		-1.46917	-0.0366477			-1.02057	0.192545						-0.129307	-1.15028	-0.00703204	-0.314018	1.02278	0.0501354
YDR025W	RPS11A	231.265	232.003	132.986	2.2417	2.13995	2.4604	1.80523	0.663301	0.77038	2.87183	2.70328	2.76072	2.94843	0.81706	0.963689	1.26878	1.07523	0.242954	1.11636	2.03995	1.74537		2.04685	2.39954	2.33417		2.32453	0.051833	0.0816051		1.04324	0.202875	0.398205		1.14437	1.60305	1.4345	1.49194	1.67965	0.574105	-0.152671	-0.359595	-0.588792		-0.277675	-1.64461	-0.917833	-1.64461
YDR026C		118.316	73.831	30.7965	-0.517357	-0.322976	0.376297	0.308238	0.214832	-0.109298	-0.996853	-0.52939	0.202408	0.372589	0.0800639	-0.375046	0.474214	-1.12413		-0.829083	0.0868351	0.141347	-0.0130671	0.4994	-0.181361	-0.0164845	-0.142232	0.348786	-0.0039068	-0.0351551	-0.0985396	-0.231082	0.154228	0.291383	0.13409	0.0127928	-1.47107	-1.0036	-0.271806	-0.101626		0.454037	0.268196	0.157831	-0.276321	0.150613	0.725842		0.725842
YDR027C	VPS54	87.7247	57.2354	40.7508	0.248252	0.0704813	-0.0721621	-0.165854	0.177004	0.188901	0.076666	-0.0129634	-0.348092	-0.443173	0.0178988	0.0787675	-0.771298	-1.56736	-2.34485	-1.60906	-0.276907	-0.084493	0.0449594	0.0695189	-0.662021	-0.347445	-0.0750467	-0.200072	-0.600509	-0.853065	-0.844227	-0.87816	-0.36646	-0.456909	-0.570186	-0.561803	0.847964	0.758335	0.423206	0.328125	2.36275	1.68783	0.385114	0.262952	0.495139	0.269591	1.26462	1.93954	1.26462
YDR028C	REG1				-0.210425	0.420112	-0.15496				-0.566479	0.445939	-0.44973					-0.960917	0.662414	-0.617424	0.278428	0.0414145			0.0718157	-0.162932			-0.376872	-0.707337			-0.171279	-0.323585									0.206612	0.204346
YDR029W		264.952	147.757	132.122	-0.291991	-0.816113	-0.0716803		0.0878496	0.773201								0.381244	1.13529	0.991586			-0.547736				-0.761288		0.609692	-0.288314	-0.494958	-0.36988	0.689749	0.0597717	-0.240313	-0.110458									-0.520975
YDR030C	RAD28																						-0.24177				-0.40703				-1.01991				-0.736113										0.329083
YDR031W		150.708	110.189	67.7808	0.273967	0.825538	-0.0832865	-0.329494	1.02968	0.825681	0.112723	0.978074	-0.361748	-0.724745	1.41915	1.04785		0.841596	1.10371	1.0586	-0.697047	-0.510954			-1.21721	-0.97241			0.176996	-0.579462		-0.415501	0.312111	-0.206595		-0.150969					0.315442	-0.0107535	0.52016	0.461456
YDR032C	PST2	296.363	206.1	132.369	1.01406	0.284856	-0.189544	0.199573	1.33193	1.0287	1.15046	0.26841	-0.492183	0.18561	1.91585	1.35681	-0.590413	1.16701	1.88344	1.52742	0.10476	0.0373575	0.313888	0.358585	-0.157675	-0.168877	0.236328	0.168999	-0.734049	-1.11525	-0.484171	-0.843477	-0.483008	-0.696776	-0.230125	-0.531005	1.74088	0.858824	0.0982298	0.776023	0.0324083	-0.170609	0.262435	0.206235	0.466452	0.189586	-0.268839	-0.0658216	-0.268839
YDR033W	MRH1	173.863	109.75	81.4266	1.59893	1.80979	1.79483	1.93662	2.11689	2.02976	1.97055	2.26993	1.94371	3.17451	3.20583	2.88028	1.88877	1.0636	0.371059	1.68273	2.20282	1.34272	1.80288	2.20836	2.61477	1.74409	1.96033	2.53073	1.5623	1.52172	2.19814	2.16817	1.52114	1.71574	2.30322	2.1433	0.0817863	0.381166	0.05494	1.28574	2.83477	1.19754	-0.411946	-0.401369	-0.342889	-0.322374	1.1426	2.77983	1.1426
YDR034C	LYS14	200.113	120.912	79.1373	0.281372	-0.13019	-0.0434522	-0.118564	0.126957	0.18636	0.123106	-0.276351	-0.31285	-0.361802	-0.0643455	0.0749009	-0.129838	-0.794296	-0.70576	-0.429363	0.26675	0.383649	0.268946	0.362519	0.0563836	0.338603	0.184293	0.174021	-0.278875	-0.275629	-0.0234785	-0.297842	-0.0857516	0.0713769	0.204982	-0.0464891	0.252944	-0.146514	-0.183012	-0.231964	0.641415	0.504264	0.210366	0.0450469	-0.0206898	0.188498	0.687276	0.824426	0.687276
YDR034C-A
YDR034W-B		224.593	122.649	121.42	-0.208487	-0.882947	-0.277342		-0.743296		-0.563762	-1.26437	-0.599958		-1.49448			1.48181	1.99673	1.29781																					-3.49122
YDR035W	ARO3	390.599	228.792	94.0348	0.718355	0.945097	0.632843	-0.0710473	0.32548	0.0846924	0.735833	1.135	0.517328	-0.280041	0.261898	-0.079822	0.796213	0.597206	0.445162	0.943326	0.47656	0.49842	0.649922	0.35636	0.333634	0.506795	0.625398	0.166158	1.16218	0.812342	0.194291	0.508132	1.17193	1.06674	0.410658	0.669203	-0.0603805	0.338786	-0.278886	-1.07625	-0.183264	-1.02315	0.142927	-0.0083752	0.21474	0.190202	-0.744262	0.0956214	-0.744262
YDR036C	EHD3	142.868	90.575	69.7615	-0.0738596	-0.310834	0.396823	0.164546	-0.0713567	-0.211251	-0.374991	-0.513453	0.227604	0.12534	-0.390247	-0.530202		-0.478194	-0.397156	-0.447136	-0.526234	-0.376969	0.406284	-0.162116	-0.99149	-0.776059	0.343306	-0.495816	-1.82419	-1.70804	-1.13341	-1.54934	-1.43443	-1.23911	-0.84331	-1.1578					0.00690918	-0.0830665	0.465256	0.39909	1.18662	0.333701
YDR037W	KRS1	363.486	270.857	138.201	0.531675	-0.0488208	0.472889	0.548322	0.219855	0.243944	0.474075	-0.169551	0.320978	0.785697	0.0883183	0.162534	1.85956	0.919768	0.133128	0.815013	1.1545	1.05411	1.16955	1.09648	1.22948	1.32114	1.22704	1.11112	1.53367	1.6155	2.27499	1.86042	1.49615	1.80154	2.37581	1.87001	-1.38548	-2.02911	-1.53858	-1.07386	-0.0448095	-0.652479	-0.0749831	-0.267032	-1.14877	-0.0146399	0.886102	1.49377	0.886102
YDR038C	ENA5
YDR039C	ENA2	182.968	131.178	87.9354	-0.440884	-0.0720829	-0.325409	-0.0898036	0.21865	-0.550036	-0.889624	-0.200084	-0.658962	-0.312314	0.086339	-1.04578	-0.411675	0.108081	0.0631901	-0.375499	0.256608	-0.0543218	-0.42779	-0.128592	0.0429813	-0.30323	-0.622411	-0.453015	-0.0856692	-0.508694	-0.368031	-0.481264	0.0828693	-0.14185	-0.120436	-0.209365	-0.477949	0.211591	-0.247287	0.0993607	0.023149	-0.670283	0.213626	0.248908	-0.501975	0.324422	-0.422996	0.270436	-0.422996
YDR040C	ENA1					-0.416085	-0.0090138					-0.651598	-0.270575
YDR041W	RSM10	247.786	173.787	114.424	-0.583147	0.815425	0.0794963	-0.211421	-0.123174	-0.0737431	-1.0891	0.9648	-0.161926	-0.52158	-0.475402	-0.320937	-0.103642	1.25209	1.45357	0.841897	0.476033	0.138675	0.328336	0.104139	0.332937	-0.0203996	0.253056	-0.155871	0.70539	0.288822	0.232485	0.0434934	0.77327	0.587784	0.446731	0.256612	-0.985458	1.06844	-0.0582836	-0.417937	-1.92897	-1.16283	0.143096	0.159075	-0.193675	0.26001	-1.10455	-1.87069	-1.10455
YDR042C		218.649	122.13	84.3488	-0.852736	-0.45921	-0.307385		-0.229886	-0.40667	-1.46711	-0.708201	-0.636837		-0.650767	-0.8276		-2.8203	0.233843	0.16852			-0.618323				-0.843016														-0.88461	-0.996119
YDR043C	NRG1	589.279	219.212	95.5777	0.967975	0.393237	-0.585081	0.73737	0.347952	0.730806	1.08584	0.410664	-0.977719	1.11099	0.298828	0.903464	0.228392	1.08597	0.0797589	0.962244	0.584725	0.877459	0.504284	0.337741	0.476565	1.06226	0.456774	0.142386	2.20259	0.586298	-0.763839	-0.334207	2.07996	0.85994	-0.494262	-0.0787806	0.857452	0.182271	-1.20611	0.882596	0.219069	-0.0587803	0.108159	-0.184806	0.951036	0.195355	1.14733	1.42518	1.14733
YDR044W	HEM13	562.295	310.908	165.602	0.395313	0.741093	0.970633	-0.387251	-0.161628	-0.245796	0.282871	0.867236	0.931977	-0.824126	-0.538596	-0.582774	1.1585	1.30857	0.948199	0.97751	0.424196	-0.036244	0.406947	0.142482	0.264438	-0.276738	0.344074	-0.106916	1.57558	0.534299	0.28894	0.891003	1.53273	0.812367	0.50005	1.00919	-0.875628	-0.291263	-0.226522	-1.98263	-1.48679	-1.56028	0.159758	0.240494	-0.155976	0.249397	-1.33376	-1.26027	-1.33376
YDR045C	RPC11	180.573	129.965	70.6505	-0.0865265	1.27152	-0.323593	-0.0953812	0.376501	-0.200915	-0.392752	1.56343	-0.656733	-0.321912	0.345743	-0.514473	0.690682	0.842603	0.800051	1.04828	0.14054	0.90038	-0.0419466	0.58478	-0.110394	1.09586	-0.175669	0.457797	0.361785	0.228659	0.233649	0.584188	0.473387	0.532742	0.44783	0.736741	-1.08343	0.872752	-1.34742	-1.01259	-0.454308	-1.56275	0.250934	-0.195475	-0.623499	0.126983	-0.215338	0.893108	-0.215338
YDR046C	BAP3	197.209	140.466	70.1948	0.135748	0.338352	0.815513	0.40327	1.04331	0.84135	-0.081085	0.338626	0.741562	0.536108	1.44155	1.0717	1.21288	0.625543	0.394631	1.10166	1.0609	0.728246	1.06459	1.16441	1.1058	0.843598	1.10552	1.19786	1.712	1.15971	0.230911	1.16055	1.6518	1.38455	0.445244	1.24854	-1.29396	-0.874251	-0.471316	-0.676769	1.04692	-0.0299623	-0.0448979	-0.115352	0.660273	-0.0334423	0.441353	1.51823	0.441353
YDR047W	HEM12	163.318	110.543	70.1192	0.908352	0.0845886	0.347008	0.264117	0.149202	0.219365	1.00224	0.00555292	0.166455	0.296671	-0.0277901	0.12513	1.58655	0.923044	0.109895	0.763905	0.506819	0.1734	0.507637	0.388256	0.373618	0.0304882	0.460656	0.206881	1.92917	1.2909	0.290524	0.923206	1.84133	1.50457	0.501547	1.03778	-0.584303	-1.58099	-1.42009	-1.28987	-0.137685	-0.638776	0.133201	0.142911	-0.0408911	0.181375	0.781315	1.28241	0.781315
YDR048C		183.249	100.139	58.7661	-0.921981	-0.631305	-0.185594		0.427921	-0.7228	-1.56421	-0.934082	-0.487334		0.430246	-1.3087		0.671567	0.441541	0.634578	-0.0648222		-0.436786		-0.381766		-0.632827		-0.404477	-0.658005	-0.247301		-0.195372	-0.278453	-0.00640969						-0.0112945	-1.94328	0.316944		-0.626417
YDR049W		84.3676	64.1014	47.9449	-0.280688	-0.115568	-0.327138	-0.00387663	-0.277037	-0.601224	-0.665001	-0.25716	-0.661085	-0.164461	-0.728253	-1.12368	-0.247327	-0.594129	-1.13255	-0.732332	-0.62098	-0.153521	-0.734269	-0.660066	-1.11669	-0.448604	-0.977262	-1.13158	-0.599075	-0.547784	-0.440147	-0.314265	-0.365208	-0.177613	-0.188546	-0.0610723	-0.417675	-0.00983308	-0.413758	0.0828653	0.404294	-0.391349	0.49571	0.295082	-0.788716	0.471518	0.0224088	0.818052	0.0224088
YDR050C	TPI1	1650.31	1039.52	560.315	2.65456	2.55896	3.07191	1.75464	2.2961	2.25767	3.45073	3.25325	3.51137	2.86138	3.50033	3.22712	2.52772	2.18097	2.40371	2.36578	2.36338	2.11693	3.18906	2.49886	2.82693	2.87866	3.56529	2.90164	2.33512	2.08488	3.27471	2.7196	2.19562	2.23097	3.32	2.63296	0.923017	0.725529	0.983652	0.333662	1.09662	0.861346	-0.463555	-0.761738	0.245292	-0.402776	-0.122306	0.112973	-0.122306
YDR051C		139.127	93.3953	57.8999	0.732044	0.621598	1.02359	0.417412	0.186641	0.36209	0.755026	0.710396	0.99698	0.560442	0.0337361	0.342335	0.859763	0.381774	0.459956	0.469142	0.689979	0.466253	1.09668	1.22981	0.615652	0.459656	1.14267	1.28136	0.791771	0.857106	0.166763	0.625812	0.848659	1.1077	0.384659	0.773702	-0.104737	-0.149367	0.137217	-0.299321	-0.42622	-0.126807	0.0743273	0.00659735	0.758015	-0.0515427	-0.264024	-0.563437	-0.264024
YDR052C	DBF4																						0.473859				0.421547				-0.306393				-0.0622201										0.483767
YDR053W		133.129	80.5587	39.7551	0.230223	0.364682	0.551315	-0.0910901	0.259099	0.426409	0.0513858	0.373184	0.417248	-0.314528	0.152811	0.440219	-0.603343	0.604034	0.980629	0.699716	0.716613	0.722404	1.0259	0.781494	0.650846	0.835036	1.06072	0.708956	-1.09414	-0.913858	-0.581176	-1.0001	-0.797277	-0.512528	-0.321743	-0.670082	0.654729	0.976528	1.02059	0.288815	-0.827818	-0.259497	0.0657664	-0.112632	1.38246	0.0725383	-1.28009	-1.84841	-1.28009
YDR054C	CDC34	268.053	176.953	113.028	0.199615	0.109361	-0.200113	0.16839	0.539782	0.458687	0.00846862	0.0380678	-0.505156	0.131955	0.614073	0.489341	0.754165	0.939283	0.706137	0.703204	0.319698	0.409068	0.143812	0.772165	0.12635	0.375853	0.0394084	0.697045	0.681709	0.608178	0.421235	0.452607	0.752602	0.879958	0.624998	0.619899	-0.745696	-0.716097	-1.25932	-0.62221	-0.0920637	-0.213864	0.193347	0.0332151	-0.58559	0.0751201	1.04546	1.16726	1.04546
YDR055W	PST1	383.275	88.3193	112.37	0.0302043	0.68533	0.794199		0.755618	1.26108	-0.229075	0.794046	0.715398		0.96877	1.71046	0.272495	-0.211618	0.2663	1.53985	0.339175	0.407726	0.19924	-0.106676	0.152088	0.373886	0.103584	-0.425032	0.410282	-0.125649	0.424985	-0.831844	0.515713	0.208592	0.62854	-0.520675	-0.501571	0.521551	0.442903		0.70247	0.170614	0.187087	0.0338401	-0.524956	0.318357	-0.272289	0.259567	-0.272289
YDR056C		283.174	173.188	120.632	0.0949343	-0.0810233	-0.387007	0.185966	0.213099	0.226973	-0.138312	-0.211818	-0.734576	0.162197	0.0772154	0.136707	0.155788	0.690689	0.561917	1.44298	0.494488	0.46734	0.0255528	0.13119	0.357324	0.461248	-0.0975162	-0.121333	0.547832	0.481102	-0.32525	0.025652	0.635761	0.763698	-0.0800302	0.240769	-0.294101	-0.367607	-0.890364	0.00640804	-0.484702	-1.30628	0.137164	0.00609178	-0.017486	0.252523	-0.415911	0.405663	-0.415911
YDR057W	YOS9	78.1368	50.8102	36.3556	-0.670564	-0.568107	-0.323849	-0.112502	0.161499	-0.383952	-1.21168	-0.851132	-0.657048	-0.35137	-0.00758119	-0.793027	-0.667382	-1.31325	-2.43848	-0.717925	-0.548223	-0.726972	-0.758183	-0.981441	-1.02055	-1.28898	-1.00495	-1.54191	-1.34726	-1.39833	-0.92783	-1.67204	-1.01819	-0.955767	-0.649145	-1.26676	-0.544294	-0.18375	0.0103342	0.316012	2.4309	-0.0751015	0.472324	0.562005	-0.355805	0.560465	-0.0854357	2.42056	-0.0854357
YDR058C	TGL2	81.2532	48.5565	35.7341	-0.934036	0.0675	-0.344614	-0.21586	0.0389125	-0.39093	-1.58111	-0.0168765	-0.682537	-0.529217	-0.209035	-0.803647	-2.02051	-1.27558	-1.1257	-0.409199	-1.62243	-1.35841	-1.11621		-2.44004	-2.21432	-1.41949		-2.28412	-2.08007	-2.00768		-1.83584	-1.57948	-1.66903		0.4394	2.00363	1.33797	1.49129	0.916669	-0.394448	0.817607	0.855918	0.249543		-1.73242	-0.421302	-1.73242
YDR059C	UBC5	184.852	148.934	100.118	0.656208	-0.661786	-1.58109	-0.427071	0.0945305	0.24505	0.648692	-0.974089	-2.20036	-0.892644	-0.117635	0.164218	-1.0942	0.542113	0.968638	0.694839	-0.646766	-0.176609	-0.598379	1.10597	-1.15076	-0.482437	-0.819924	1.12324	-0.863094	-1.07348	-1.56671		-0.595632	-0.658565	-1.25254		1.74289	0.120107	-1.10617	0.201552	-1.08627	-0.530621	0.503998	0.305829	0.432618	-0.0172681	0.575545	0.0198933	0.575545
YDR060W	MAK21	133.339	108.977	48.927	-0.422206	-0.0305309	0.468887		0.247251		-0.863434	-0.145545	0.316066		0.13334			-0.494166		0.160745	1.38127	0.915936	1.04235	0.799541	1.52914	1.11865	1.07976	0.731998	0.242869	-0.230857	1.34901	0.439037	0.369602	0.112339	1.50124	0.607848							-0.147874	-0.202715	-0.421483	0.0675433
YDR061W		181.953	124.441	82.8388	0.267503	-0.530307	-0.821951	-0.853208	0.0482912	0.354276	0.103659	-0.801518	-1.26849	-1.62589	-0.193622	0.330443	0.701651	0.316392	0.176106	0.0502619	-0.154163	0.0501336	-0.227516	-0.0681695	-0.499823	-0.150154	-0.390527	-0.375869	0.420486	0.136618	0.257574	0.288724	0.524619	0.448535	0.470426	0.474372	-0.597992	-1.50317	-1.97014	-2.32754	-0.369728	0.280181	0.34566	0.200288	-0.860953	0.307699	2.25032	1.60041	2.25032
YDR062W	LCB2	179.318	110.163	62.1414	0.0110842	0.302765	0.872344	0.166747	0.19522	0.20419	-0.255885	0.291917	0.811324	0.129127	0.0478347	0.102035	0.408184	-0.219042	-0.752465	-0.293143	0.380396	0.267656	0.131081	0.360526	0.20656	0.168618	0.0246675	0.171476	-0.146394	-0.23077	0.278212	0.10562	0.0298711	0.112418	0.489918	0.311779	-0.664069	-0.116267	0.40314	-0.279057	0.800299	0.395179	0.173837	0.0990382	-0.46525	0.18905	-0.00796094	0.39716	-0.00796094
YDR063W		421.66	255.332	120.996	0.4971	1.00984	1.08726	0.150101	0.91169	0.918809	0.425595	1.21998	1.07514	0.100486	1.22525	1.18958	0.149474	1.01099	1.53971	1.35895	0.630746	1.40811	0.957966	0.45372	0.53738	1.83992	0.982061	0.290464	0.553923	0.725007	0.350887	-0.104667	0.641077	0.986843	0.558557	0.125048	0.27612	1.07051	0.925671	-0.0489883	-0.314461	-0.169378	0.0933666	-0.431808	0.423504	0.163256	-1.09505	-1.24013	-1.09505
YDR064W	RPS13	865.6	853.387	306.956	2.08954	1.50948	2.22399	2.032	0.531996	0.639527	2.65848	1.87577	2.47052	3.33864	0.601278	0.764552	3.70114	2.20292	1.06391	1.79198	2.33581	1.91371	2.96754	2.45771	2.79051	2.58086	3.30881	2.8491	2.8673	3.06056	3.79687	3.83718	2.66009	3.12361	3.81316	3.62535	-1.04266	-1.82537	-1.23062	-0.3625	-0.462631	-1.02743	-0.454695	-0.667149	-0.504347	-0.391388	0.203186	0.767985	0.203186
YDR065W		144.927	100.48	59.5461	0.0479254	-0.0333374	0.845285	0.386689	0.648916		-0.204227	-0.149229	0.778108	0.507578	0.79342		0.565977	-0.243129	-0.0979967	-0.16326	0.381727	0.16241	0.486361	0.754379	0.208318	0.0143828	0.436022	0.674336	0.134301	-0.0580613	0.0675536	0.0152546	0.27485	0.270426	0.290959	0.231536	-0.770204	-0.715206	0.212131	-0.0583986	0.891417		0.173409	0.148027	0.145063	0.0800428		0.679286
YDR066C		333.329	246.602	136.805	-0.131839	-0.600742	0.549182	-0.320403	0.0364163	0.0660371	-0.456289	-0.893967	0.414631	-0.709102	-0.213137	-0.108213		0.540963	0.336046	0.861088	-0.492641	-0.214587	0.05092	-0.659536	-0.947099	-0.538093	-0.0681452	-1.13091	-0.318894	-0.207625	0.236448	-0.124484	-0.120679	0.133593	0.450474	0.10745					-0.549183	-0.969301	0.454458	0.323507	-0.518619	0.471371
YDR067C		105.798	61.7512	40.2346	0.520288	-0.234141	-0.169438	-0.337367	-0.374507	-0.158471	0.458108	-0.41279	-0.467502	-0.738292	-0.888432	-0.44988	-0.473522	0.290814	0.0596107	0.174005	0.0364444	-0.179507	-0.501191		-0.247949	-0.486686	-0.707397		-0.182338	-0.055936	0.0280152	-0.393137	-0.00149914	0.272371	0.253616	-0.13111	0.93163	0.060732	0.00602016	-0.26477	-0.948043	-0.623884	0.284393	0.307178	-0.961013		-0.629904	-0.954063	-0.629904
YDR068W	DOS2	88.5373	56.0031	33.3165	-0.64102	-0.419363	0.528021	0.117309	0.461996	0.0136935	-1.17025	-0.6559	0.388655	0.0440604	0.486243	-0.187871	0.265614	-0.457134	0.0393261	-0.290581	-0.233867	0.0791487	0.230708		-0.605147	-0.107633	0.140019		-0.186622	-0.33883	0.134551	-0.0954795	-0.00523811	0.0135559	0.354236	0.133206	-1.43586	-0.921514	0.123041	-0.221553	0.446917	0.102709	0.37128	0.186782	-0.214216		-0.0203318	0.323876	-0.0203318
YDR069C	DOA4	94.0381	68.1026	54.738	-0.246344	-0.07621	-0.648061	-0.403784	0.221837	0.170779	-0.616844	-0.205501	-1.05503	-0.852574	0.0915758	0.0511882	-0.786152	-1.61785	-1.22855	-1.7544	-0.510532	-0.711884	-0.413446	-0.286375	-0.97074	-1.26687	-0.605803	-0.654467	-1.10595	-1.8047	-1.11844	-1.31019	-0.807589	-1.32755	-0.82917	-0.94544	0.169307	0.580651	-0.268878	-0.0664222	1.32013	1.80558	0.460208	0.554983	0.223367	0.368092	2.07446	1.589	2.07446
YDR070C		291.904	132.254	114.66	-0.228319	-0.179912	0.528142	-0.304937	0.276602	2.56417	-0.59157	-0.341613	0.388804	-0.682491	0.181574	3.69357		1.07554	2.69769	1.21181	-0.18959	-0.298052	-0.595877		-0.546637	-0.660409	-0.817027		0.362625				0.47412								-2.51612	2.48176	0.357048	0.362357
YDR071C	PAA1	453.808	515.308	167.33	-0.363379	0.540825	-0.331236	0.606173	0.727128	0.517117	-0.780949	0.604378	-0.666115	0.885239	0.92195	0.578263	0.340954	0.997066	0.669124	0.577391	0.402659	0.429612	0.720026	0.59738	0.235979	0.405959	0.706567	0.473884	0.88905	0.659074	1.20057	0.596726	0.93356	0.926522	1.36105	0.747874	-1.1219	0.263424	-1.00707	0.544285	0.252826	0.000871829	0.166681	0.0236529	-0.654485	0.123495	1.00794	1.25989	1.00794
YDR072C	IPT1	242.391	126.426	70.746	0.647431	0.500969	0.817741	0.524518	1.22933	0.822754	0.636385	0.552066	0.744297	0.744737	1.74724	1.04339	0.909137	0.579759	0.494165	0.893102	1.03416	0.659437	0.32566	1.18696	1.07046	0.742761	0.249958	1.22664	0.556586	0.244629	0.260312	0.0563466	0.6434	0.547353	0.473012	0.268025	-0.272752	-0.35707	-0.164839	-0.1644	1.25308	0.150292	-0.0363016	-0.0833236	-0.223054	-0.0396822	0.315132	1.41792	0.315132
YDR073W	SNF11	621.707	362.759	207.56	0.69764	1.11991	0.240573	0.43065	0.514761	1.15974	0.706787	1.36445	0.035802	0.583221	0.572955	1.55624	1.2328	1.72013	1.7555	1.94263	0.39846	0.784999	0.821242	1.1745	0.230429	0.926768	0.823758	1.21073	1.42019	1.18254	1.02713	1.5063	1.39711	1.40543	1.19724	1.55556	-0.52601	0.131657	-1.19699	-0.649576	-1.18254	-0.386385	0.168031	-0.141769	-0.373487	-0.036234	0.81061	0.0144543	0.81061
[truncated: 5,480 more rows]
[truncated: 3 more columns]
