# Supplementary material for: Regulon-Specific Control of Transcription Elongation across the Yeast Genome
Source: PLoS Genet. 2009 Aug 21;5(8):e1000614. doi: 10.1371/journal.pgen.1000614 (PMC2721418; doi:10.1371/journal.pgen.1000614)
Supplement: Table S4 — Oligonucleotides used for the PCR amplification of the first set of probes printed on the 5′/3′ arrays XLS. (0.11 MB XLS) [file pgen.1000614.s013.xls]

## Sheet: Hoja1
		5' Probe forward oligonucleotide			5' Probe reverse oligonucleotides			3' Probe forward Oligonucleotides			3' Probe reverse Oligonucleotides
ORF	GENE	5' position	sequence		5' position	sequence		5' position	sequence		5' position	sequence
YAL001C	TFC3	3	GGTACTGACGATTTATCCTGACG		209	ATCGCTGAGTGATGTGCTTG		1553	CCACCACCCCATCTCTAATG		1740	GCGAGTTTTCTTGAGGTTGC
YAL036C		21	AATCAAAGCTATCGAAGATGAAATG		247	CAGCATAATCATTGGGGAAA		813	CGCCTCGATTTTAAAGCAAC		1051	CAGCAGCTTGTTCCGAAGTT
YAL040C	CLN3	2	TGGCCATATTGAAGGATACCA		218	CGGTCACACAAATCAACCTC		1873	AAGGCTTTTCATCCCGATTC		2078	TTGGACCCGTAAGTTTCACC
YBL004W	UTP20	2	TGGCTAAACAAAGACAAACTACTAAA		240	GGCGCAAAGCATATCAAAAT		1379	CATATGGTTCCCGTTTGACC		1576	ATAGACAGCTGCCCAATGCT
YBL017C	PEP1	26	CTCTTTGGGCCTTACTTCTCA		189	ACCTTCAGGCAAATCACGAG		1231	GGTCCAGGGTTCTCTTGTGA		1400	TGTCTCAATAGACTGGCGTTGT
YBL019W		2	TGTCATCAAGCGAAAACACG		250	GCTTGTGTGCATCAGAGTGAA		735	CAAGCCAAGCTTTCCTCAAT		891	TTCTTGGAAGTAGGGGTGGA
YBL088C	TEL1	1	ATGGAGGATCATGGGATTGT		177	TCGAGAGGAAGGAACAGGAA		344	TGTCTTCTCTGCTCGCTGAA		524	AAGGCCAAATGTACAAACACATC
YBL098W	KIN3	11	CAGTGGCCATTATAGGTGCAG		271	CCTTTGGGCTCTTCTCTTTT		294	AGCACGGGCATTTTTAGAAC		476	TCATACGTTTATTTATGAACTACAAATTG
YBL101WB	YBL101WB	2	TGGAATCCCAACAATTACATCA		202	GGAGGACCATTGCCTTGTAA		3061	CCAATTGGTGCTGAATGG		3264	ACCAATATTAACTTCTGTATGGATTGT
YBR012WB	YBR012WB	8	CCCAACAATTATCTAATTACCCACA		206	TCCTTCAAATCCGAATTTTCC		2155	GTTGCTGATGAAACCTCTGC		2400	TCAGCCTTCCCAATTAATAAAA
YBR018C	GAL7	2	TGACTGCTGAAGAATTTGATTTT		252	TTTCGTCTTCGAAAATTGAGC		3089	CGTTGAGACTAGCAACGGAAC		3282	TTATGCGTTTGCCCTCAAAT
YBR019C	GAL10	1	ATGACAGCTCAGTTACAAAGTGAA		233	TCTCTGGGATCCTCTAGCAAA		2258	AGATGGGCCACAGCAATAAC		2500	CAATTGGTGCTGCATTTTGA
YBR020W	GAL1	13	CATTCAGAAGAAGTGATTGTACCTG		255	TGTTGTGCCCATTGCATATAA		2295	CTTTATCCCGGGAAATCCAA		2474	CATATTTCGAATCTTCCACTGACA
YBR040W	FIG1	5	TCGCAATCTCAATGATTTGG		254	GGCTTGGAAAGATTCAGTGG		2241	CCGCATGACTCCATTGAAC		2484	GGGAACTTCCAGGGTCTGAT
YBR078W	ECM33	7	TTCAAGAACGCTTTGACTGCT		233	TGAGGAGACGTAAGCCCATT		583	GACGCCAGGAGTCAAGAAAG		829	ACAATGCCTTTGGCTTGAAT
YBR093C	PHO5	22	TCAATTTTAGCCGCTTCTTTG		243	CCATAACTCACCTCGGTCGT		2136	AATCCAATCGATGCTTCCAC		2385	TTGCATTTCGTCAGTGTCAAT
YBR098W	MMS4	5	GCCAGATCGTTGATTTTGTTG		203	GGATTCATCTCCGGTTGCT		1395	TGCCATAAGCGTAAGCAGTCT		1638	CAGTTGAGAGCTATTGTGGTTCC
YBR118W	ECM21	25	AACGTTGTCGTTATCGGTCA		260	GCAATGTCTTGGGGCATACT		1735	CATAGTCACGGACCGATGTG		1972	GACCAACATTAGAATTGTAACTGGAA
YBR136W	MEC1	16	AAATATCTTGACGAATTGATATTGG		224	ATATCCTTGCCGTGCTTTTG		792	CGTATCGGAGGCCAGATTTA		1004	ATTTGGGAGGCAGTGTCGT
YBR140C	IRA1	5	ATCAAAGCGATCCGCAAG		218	TTTTGCTCTGGCTTTGGAGT		1889	ACGAAGGTGGTGCTCAAGAC		2104	CAGCTGGAACCTCTTCAACC
YBR160W	CDC28	26	AAAGACTTGAGAAAGTCGGTGAA		259	CCACAGACAGCTCGAACAAA		1398	AATCACGGGTCCTAACAGCA		1577	CCGCTATTTATGGTCCCAGTT
YBR181C	UBP14	3	GAAGGTATGTAATATCACCCAAATCC		247	GGAAATGGTGCAAAGTGTCT		499	CGCTCCCAACTGTCGATTAT		741	AATTCCACACTCGGTCTTGG
YBR208C	DUR1,2	24	TGCTGAAATATCGTTAGGTTGG		229	CCTCCAAGCCCAGAGTTGTA		702	TGTCAAGAAGGGCAAGAAGG		884	TGCAATGTAGATGAATCCGAAG
YBR263W		4	TTTCCCAGAGCTTCTGCATT		224	ATCGAAGCTGCACTCGATTC		1351	GGTGCCCAATTTTCAAGGT		1592	CCCATGACATAACCAATATTAGCC
YBR275C	RIF1	4	TCGAAAGATTTTTCAGATAAAAAGAAA		238	CCTGCACTACAGTTGCGTGT		1469	AAGCATACGAGGATGGCACT		1706	CCCTCAAAATTTGCTTTATCG
YCL008C	STP22	1	ATGTCTGCAAACGGCAAGAT		247	GCGGTGGAGTGAGATTATGC		421	AATCCTTCTCGTGTTGACGAA		634	AACTGGAGGATAGTCTAAACCATAGG
YCL014W	BUD3	3	GGAGAAAGACCTGTCGTCTCTTTA		240	ACCGGTGAAATTAGCAGCAG		235	ACCGGTTCTTCATCATCGTC		482	GAAAACAAATAAGCGATTGTTTCTAAC
YCL016C	DCC1	14	TACATTCCGCACCCGAGTAT		228	CTGGACACCTTTGGCGTAAT		869	AACGATTGGTCGTTAAAGGAG		1095	CTCCTCATTGTTAACCTTGGTAAT
YCL029C	BIK1	25	GGATGTTTCATACAAATCCCAAA		252	ACCACGTTGCTCAGAAGATG		1323	AGATGTCAAGAAAGCGCACA		1509	TGAAAGATCCACATGGACTGA
YCL033C	YCL033C	8	AGTGGAGCAGGCTGTACGTT		245	AAGAACGGCGCAGAAAGTT		1882	CAGATAGGGAGAATGCCTGAA		2076	TCATTCAATAGTATCATTTGGATCAG
YCL034W	LSB5	19	CATCCGCATACAGCTATCACC		215	ACGCTCCCTGGAATACCTCT		1121	AGGTAGCACCTGGCGTATTG		1330	AGGACTTTGGCCTTTCAATG
YCL036W	GFD2	14	AAATGGTGAGAGATAACAGTAATAACG		240	TCTCGAGAAGAACAAATCGTCA		2147	TTCCCCATGACGAATATGGT		2340	ACCTGAACCGTCCAGAATTG
YCL037C	SRO9	26	ACACTGCTACTGCCCCAGTC		248	TCCCACTTTTCAGAGCCATT		504	TGAACAAAGGCGCAAATACA		692	TGTCCCTTTTTCAAATGTGTTCT
YCL040W	MET8	30	TGAGAGAGCGGTCATCCAG		202	CACCAGTCTTCAAACCACCA		1138	TCATCTTCTAAGGCCGAGGA		1319	ATGATTGCCGTCAAAAGACC
YCL047C	YCL047C	7	AAGACGTTCGAGCAGTTTCG		244	CGACGAATGTAGCACCAAAC		674	GTGCTGCAGTCTCACATCCT		903	CTAACCGGTGGTTGGTAAGC
YCL048W	YCL048W	27	TTTATTCGCGATTATATTTGCAT		251	CGCATGGACATCAAAGTTTTT		1867	AAGCAACTGGTGGGTGAAAC		2072	GCTCCATTCGTGCTCAAATTA
YCL049C	YCL049C	29	CTTCCCTCTTTGTGGCTTTG		266	CACAATTGCACTTTGGTTGG		890	TTTTGAGAACCATTGCCACA		1080	AGCCAACATTGCCTTGTCTT
YCL059C	KRR1	26	AACCTTGGGATACGGATGAT		206	GCGGCTCTCTTTGCTTTAGA		758	TCGTTGCCAACAGACAGTTC		942	TTCATGGCACTGAGAACCAA
YCL061C	MRC1	18	TGCTTTGTCCTCGTTGACTG		205	CATCGAATGAGACGGTAACCT		5375	CCCAAAAGGATTCATCGAAC		5614	CGTCATTCACCTTATCGGTTT
YCL064C	CHA1	23	CACCATTATTACGTCAATTCTTCC		262	GCAGGTCGTTTAGCGAAGAT		1566	AGTTCAAGAAGCTCGCCACT		1779	TCAGTCACGGTATTGGTCAAA
YCL066W	HMLALPHA1	10	TCGAAGCCTGCTTTCAAAAT		232	CGTTGTTGTTGGAGTCGTTG		1109	ATTCATACGGCTCCAGCAAC		1289	TAATCGTCGTCACCACCGTA
YCR005C	CIT2	12	TTATCTAAATTCAAACAGAAATGTTGC		207	ACTTGGGTATTGGTGCCTGT		189	CAGGCACCAATACCCAAGTT		379	AGCTGGGGTGACTGAACCTA
YCR009C	RVS161	23	AAGCTATCAACAGAGCTGGTCAC		205	TCGAATCAGTGCTTACATCCA		389	GAAGAAGGCGTGATGAAGATG		629	TGCTCCTTTCTATCTCTTCTTGC
YCR011C	ADP1	2	TGGGAAGTCATCGACGTTATC		226	ATAACGACTGCCCGATACCA		1052	CTCCTGGGGCAGATCAATTA		1249	CAACGAATTCCAAGCCCTTA
YCR019W	MAK32	23	CAGAAACGAAAAGCCTAGTCA		261	AGGCGATGTGATACCCTTGT		746	CGCTGAGGAAGTACAACTGG		926	TTTTTACCATACTTGACTTCTCTGAA
YCR032W	BPH1	14	TTAATGCTGCTTCGAAAGTCTTA		207	TTCTGCCTGTTGGGAAGTCT		319	GGGGGATCTTCCGATGATTA		538	TCAGGCTTTTAGCGATTTTGTT
YCR044C	PER1	2	TGAGGTTAGCTGTGGTTGTGA		208	TTTCAATCACTGGAGGCAAA		2914	CGCATGTCATCGTATGGAGT		3126	AACTTCTCCCAAAGTCTTCTGTTT
YCR045C	YCR045C	2	TGAAGCCACAGTGCATACTCA		199	CTTTGCCCTCGATCTCTCTG		329	TCAAGCCAGAATACCAGAAAAA		544	TCTCCATATCGATCCATTTCTGT
YCR051W	YCR051W	14	TATGGGTGGCTGCTTCAGAT		182	TGGATTACAAAAACGGGGTAA		530	GGTGACTGTGGTAGCGCTTT		730	AGCTTCGGTTTGTTCCTTGA
YCR063W	BUD31	5	CGCGCATAAAGACCAGAAG		260	CGGGTCAGCTATTCGAGTGT		615	CTGAAAAGGACGCTGTCTCC		861	CGACGAGCAACCTTCTTAGC
YCR065W	HCM1	23	TCATTGATGGCCATAATAGTTTTT		215	GGCATCTTCCATTTTGGCTA		694	CCAGCTATTGTTGTCCGTCA		877	CAACACCAGAGTTGGAAGCA
YCR067C	SED4	2	TGAGTGGCAACTCTGCAAAC		241	ACTGGGGCCTGTTGAAAT		356	CATCATTGCCGCTAACACTC		548	TTAAGCCAAGGTGGTCAAGA
YCR079W	YCR079W	15	TGCTTATGCGTATTGCAAGC		195	TTCGGTGATACCCTTCTTGTG		245	TTACCGGTGCTTCTTTGGAC		453	AGCAACCTTTTGGAAAGCAC
YCR086W	CSM1	23	AAAACTCAGTGAAACAACAGATCG		249	GCCACCTTTGCCTGATAAAA		743	TGAGCGGATTTGTATGTCCA		985	ATACATCCCCCACAGCATCT
YCR088W	ABP1	2	TGGCTTTGGAACCTATTGATTA		235	GCGCCTTAACGGTCTTTCTA		227	TTAAGGCGCAAAGACCAATC		453	GGCAACCTTTTGGAAAGCA
YCR088W		2	TGGCTTTGGAACCTATTGATTA		190	TGGTTGTACCGTTCTTTCCA		1231	GATTCCATGGACGAAGCAAC		1456	CAACCTTGATATCGGACAATCC
YCR089W	FIG2	2	TGAACTCATTTGCGTCATTAGG		270	ACAGAGCCTTTCAATTCCCTA		590	TCTGAAGCCAGAAAGCACAA		777	CCTTCAGATAATTTGGCCTTACC
YCR090C	YCR090C	2	TGCCGTTATTTTTGGTTCTGA		204	TCCCCTATCGATGATCTGGT		602	TGTGGTGACTGTGGTAGTGC		829	AGACTTCTTTTCAGACTTCTTAGCA
YCR093W	CDC39	18	CCGTGATTTGAACACAGCAT		271	GGGAATTTGTTCTCGCTGAT		575	TCCGTTTTCGGTTTCAGAAC		809	CGTTACGACGAGCAACCTTT
YCR094W	CDC50	13	TTCAAAAGAGGTAAGGCTCCA		236	CGGATAAAAAGAAGGGAGTCG		521	AGGTGCTGTCGGTAACTTGG		739	TCTTCGTCTTCTTCTGGAGTGA
YCR095C	YCR095C	22	TTTGGGATTGCTGAAGAAGG		242	TGAATCTCCGGTGATACTGCT		549	GCTGGTTACACCACCCATTT		780	TTTGGGCAGAAACGTTGATA
YCR097W	HMRA1	22	GCGGAAAACATAAACAGAACTC		239	TTAGTGCAACCCGCCTATTT		774	CGTTTTCCCAAGAGACGGTA		988	CAGCTTCAGCTTCAGCCTTC
YCR105W	ADH7	19	TTTCAGGGCATCGGTATTTC		184	ACAATGTTGCTGCTTCCAAA		705	TGTTCACGACAAGGTTTTGG		915	GTTGGTCTGGCTTGGAATTT
YCR107W	AAD3	13	GCGTCCGACTCATCTAGCA		231	CCACAGCATCAACGCTTCTA		594	CAAGGTCATTGAGCAACCAA		814	CCAAAGCATCGTAGTCAGCA
YDL020C	RPN4	2	TGGCTTCTACGGAACTTAGCC		219	GACAACTTCACGCTTGTGGA		913	ATTACCCCAATGGGTGGTTT		1123	CAGCTGGGGTTTGGAATCTA
YDL058W	USO1	13	CAAGGACTGATACAGCAACCAA		220	GGTATCGTCCCGTTCACACT		745	CCAGAACCTTGACTGCTGTTC		965	TTCACTTGGAATTTCGAAAACA
YDL077C	VAM6	24	CTCGCTGAAATCATCGGATA		183	TAGTTGTGGAGTGCCGTCAG		909	TAGCTCAACTTCGCATGTGG		1148	GGTGAGGTGATTCGTTGGAT
YDL079C	MRK1	2	TGACCGATGTGTTGAGAAGC		196	AATGTTTGCGCTGCTTCAG		903	GCGAGGCTATCATTTCAAGC		1120	TTTTGCCCAGTCTTTTACGG
YDL140C	RPO21	18	TTCTAGTGCTCCACTCCGTACA		235	AATGGTAGACACCGGACTCG		252	ACCGTTGTATTCGAGCAAGG		476	TTCACACAGTGTCTGGTGTCC
YDL147W	DIA3	12	TGCACCAATTAAGGCTGACA		253	CGCCTTGTGAGATGAACAGA		863	CGTTGACTGCATACGACGAC		1053	ATGATCACCGAAAGGGTTTG
YDL148C		1	ATGGCCGGTTCACAACTTA		236	GCCGGCTTAGGCAACTTATC		534	TCTCAGTGCTGAATCGCAAC		743	TCGTATATGCACAATGGCAAC
YDL171C	GLT1	25	TTCGATCCATTGGAAGAAGC		251	TGAGACGATTCAATGACGTG		1167	AATCATCAGGGGTGGGAAAT		1376	GCAACAAGGCATGTACCAAA
YDL215C	GDH2	11	ATAACAAAAATCGCGGTGCT		250	TGCTCTTGACATTGCCCATA		682	AGCGCTTGGTCCAGGTACTA		898	TCCAAAGAGATTTAGATCCTGTCTC
YDR039C		4	AGCGAGGGAACTGTCAAAGA		275	GCGGGATCGTATGTTTTTCT		685	AAGAGGAATGTGGCCAGAAA		930	TGCTTCTTCTTCCGGAGCTA
YDR040C	ENA1	3	GGGCGAAGGAACTACTAAGGA		212	ACCTCGGCAATGGTAGTCTG		599	ACTTTGACCCAAGTTTTGAAGC		784	GCGCACAAATATCTAGGCTTG
YDR043C	NRG1	35	TTTCTACTATGCCCGCACTG		192	CGGGGTATCGAAAAACTCAA		820	AAGCTAATGGGCGAATTCAA		1056	ACCCCAATAGGCATAATCCTC
YDR055W	PST1	21	CGCTTCAACTGCGCTCTTA		231	TGGGCTTTTCTTCAGCTTGT		1259	GCGTCGATAAACTGGACGAT		1454	CGCCTCTTCAATCGAATCTC
YDR071C	PAA1	12	AAGTAGCACGCTACCGCTTC		212	CCGTCGTTGTCCAACACAT		473	CCTTGGAAAATGACCCTGAG		660	TCTCTTGGAATCTGGTTCGTC
YDR093W	DNF2	6	AAGTCCCTCCAAACCCACTT		210	ATGGCCATCGAATACAGAGC		1077	TGCAGACCAAGAGGTTGTTG		1304	TGTGCATTCATTAGTTTGGTTTC
YDR127W	ARO1	3	GGTGCAGTTAGCCAAAGTCC		200	CCGTACTGGACCTTGGTTTC		1579	CCAGAGAAAAAGCCAAAGGA		1759	AATTGCTGGGGAAGAGACCT
YDR141C	DOP1	5	CCTTACCACTAAAGCCCCTTAC		248	GCGCACAGGTTAACTGACAA		302	AAGATGTGCGGAAGAAGCAT		531	GCTTGATGAGAAATCAGTCATTG
YDR150W	NUM1	4	TCCCACAACAACAGGCATAA		201	AGCGCTTACAATGAGTCCAA		923	TTTCACTCTTTGGTGGCACA		1151	TTCTCTGCGTGTACATCCTCA
YDR170C	SEC7	24	AAATGCTGAAAAAGGGGATG		212	GCAGCCGAGAAATCAGACAT		877	CTAGGAATTTTTGGCCATAGG		1076	TGTTCCCTATAAAAGTGATGCTC
YDR171W	HEM13	14	AACCATCCCTATCTCTTTATGACG		218	CGGCCAATTATTTCATGTCC		869	TGGGCCTAATGGGAGTATCA		1078	GGAATTTCTTATCATAATCGACCAA
YDR261CD	YDR261CD	28	TCACCCATTTCTCATGGTAGC		229	TCAATGATGCGACTTTTTGC		1101	GGTGGCATCCTTAACGAAAA		1313	TGCTGGTTGTCAGGATTGTG
YDR283C	GCN2	20	CTTTAGATCAATATTATGAAATACAGTGC		201	GATCTTGCCGCTTCCTGT		1484	TGGGCCAAGTAAAAGTTTGG		1697	TGTGTCGGAAGAGTGCTTGT
YDR420W	HKR1	23	AAATTTTACTCCTGGTGTCATTGTT		220	ATTTCGGAGTGGGTGTTCTG		1084	GTTCGTTCCAAGAGCTGGTC		1270	GCGCAGAGTCTTCTTTGGTT
YDR432W	TFB1	4	TCTGAAGCTCAAGAAACTCACG		231	GTGATTCTGTTCGGGTGCTT		3030	CTTTGCGTCCAGAACAGACA		3275	TCTTGTCCGCTTTCAAAAAGTT
YDR457W	TOM1	13	ACTCGGTGTGAAAAGGCAAG		240	TCTTTGACATGCTGTTGCAG		858	CGCATTGCATTTGGGTTAC		1037	TTGTCAGCGACTTCTATTACAGGA
YDR536W	STL1	14	AATTATCGAATTTCAAAGGCAAA		223	ACGAATTGCATTCAGAAAACTG		2881	ATTACAAACGTGGCCTTCAA		3123	AAGGGCTAGATACCCCATTATT
YDR545W	YRF11	9	TTCCGATAGGCGTAAGTTTGA		209	GAGCCTCTGTCCACTATCCA		869	GCGGCTTTGCAGTTTCTTAT		1089	TCGTGTTAGACTTTTGTAAAGATCG
YEL046C		30	TATCACCGCTGCTAACGACT		224	TCATCTTCAACTGTGCCTTTTT		6270	AGTGGGCTTTGAAGATGGAA		6476	AATGTTCCCGCAATCACTTC
YEL046C		30	TATCACCGCTGCTAACGACT		223	TGGAGATGGCCTTTCTCTTG		211	AAGGCCATCTCCAAAGACCT		441	GTGGACGCACTGATGGAAG
YEL050C	UGO1	15	GTCTCTTAGATCGGCGCTGT		221	TTGGCCTTAGATGGAGCAAT		1473	GGAAACCCAAATTTCACCAA		1682	TTACCGCTATCGTTGGAAGG
YEL070W		15	CGAAACAACAGCTACCAGCTT		207	CGCATCGTCAATCGAATCTA		2949	TACTCCTGTTTCCCGAATGC		3180	GCCAGCGTAGTTTACGGTTC
YEL077C	VPS3	24	CGCTTTTAATCATGATCCTTGG		192	TCCACCTGCCTCGTAAAAAG		843	GGAACATGGCACTGAGTCTG		1081	TCGTACCATATTTTTGAGTCAAGG
YER053C	PIC2	3	GGAGTCCAATAAACAACCACGTA		255	GTCGGCGGCTAGTAAAACAC		1275	GCTTGCCGCGATATTGAT		1501	ATGCTACAAGCGCACACAAG
YER056CA	RPL34A	1	ATGGCCCAACGTGTTACTTT		200	CCGTACTGGACCTTGGTTTC		1579	CCAGAGAAAAAGCCAAAGGA		1773	GCCCAAAGACACATAATTGCT
YER074W	RPS24A	28	AAGATGACGTCCCATATTCCAT		232	GCTCATTTAGGTCGTCCCACT		1101	ATTGCTGGACCTAACGGAGA		1325	AAACCGTGCATGATTTCCTC
YER096W	PRB1	28	CCTGGTGCATACCCTGAAAT		226	GGTTGGACAAAGTCCCAGAG		912	AATGGACCCAGATGTCCTTG		1152	GGTTTTTATTTCGCGGATAGC
YER107C	DLD3	25	ACAACCTCAGCTTTGGGAAC		236	GGACGCTCCGTTTCTGAATA		3130	TTTCAAGGCCACGAAAAATC		3337	CCTCTTGTTCCTCGAGGTAGGT
YER109C	FLO8	21	TTCGTATCCAGATTCAATTCCTC		226	TCTTTGGAGAGCCATCTTCC		3087	CGTCAAGGGACACGTTGATA		3274	AACCTTCGATTTCGGCAAC
YER111C	SWI4	22	TCAAACCAAAAAGATAATACCAATCA		211	CAGTTTGTGGCGCATTGATA		1616	CATCCAGTGCTCTGGCTACA		1829	TCGATGGAATAGTCCTTCTTGG
YER117W	RPL23B	5	CAGGTAACGGTGCTCAAGGT		253	CCACGTAACGCAGAACTTCA		2602	GGTTTCGGTAACTTGCCAAT		2822	TCACCGTCATCATCGACTTC
YER132C	PMD1	27	TGTTTGTTATCCGCTCAACC		247	CGCTTATGCTTTCGATCAGG		781	TCCCTGGAAAACTTGAACCA		1000	TCGCATCAATCTTCTGTAGGG
YER138C	GCD11	28	TCACCCATTTCTCATGGTAGC		260	GCAATGTCTTGGGGCATACT		1735	CATAGTCACGGACCGATGTG		1914	GCCTCCTCTTCTGCTGTTTG
YER147C		3	GGAAAATCTTGGCGACAAAC		230	GCTTGTCCAGGGAACTGGTA		911	ATGGTGCGTTTGAGAGAACC		1118	ACCGTAGGGTTGGGATTTTC
YER155C	BEM2	16	TGGTCTAAGAACAGGAAATCTTCA		259	CCTTGATCAAAGCAGGGTTG		1164	ATTGGAGGGTTTGCAGAAGA		1370	GCATGCTTCTCCTCGAATGT
YER166W	DNF1	23	ATGGGCATGCTCCCATGT		278	TTCACAAAGGGGGATTTGAA		1053	GAAGGGCCAAGGTGTCATAA		1247	TGTCTTGTAGGATCATTGAGCTTT
YER167W	BCK2	12	TAGTCACCACCATCGTTCCA		251	TCCAAGTTTAATTCATCGGACA		4842	CATGGGGAGCTCAAACAAAG		5025	TGTGCATAACATCACAATTAGCTTC
YER172C	BRR2	14	AAACGAAGGATAAGGCCAAA		240	GTCCGGGTCTTGCTGATTTA		787	TCGTTGCTACAGTCCAAATCC		1024	CCTGCCCTTCTCCTTGAGTT
YER176W	PCL6	9	TCAGTGCAGAACGTGTAGCC		249	ACCAATTGCATCTGGACTCAG		775	CTTTTTAGGTGGGTCGCTCA		985	TCGTGTTTGCAACGTTTCTT
YER190W	YRF12	5	TCTACACGTTGTTTCAAGTGCAT		248	GACTCAGCATGCGAATCTCC		1329	TTTCCAAGATGGCGTAGATTG		1560	CCATTCTTCAAATGCAGTTTCC
YFL007W	BLM3	26	TCAAATCACCCATTCCCATT		189	TTGTCTCACAACACCGAAGG		1125	CGTCACACATTCGTTGGATG		1335	TGACTTCGACTCCCGATCAT
YFL022C	MET6	31	AAACTAGATGAATTGGATGAGATCAA		265	TCTCGACATTCTCAGCATCG		794	ACAACCCACAATTGATGCAG		1038	TTGCTTGTTCTCATTGTCTGG
YFL033C	RIM15	26	GCGGATCTCAGGCTATGAAA		252	CCACGATCAGAAAAGTGCAA		1148	GTTCAAGCAGGACTGTGCAA		1335	CGCCTTGTGATAAGCGTCTA
YFL039C	MAM1	14	TGTTCTAGCGCTTGCACCAT		237	TGGAATCTCTCCAGGCGTAT		1190	GCGGTGTGAAAAAGTGGAAT		1403	CAATTGGTGAAAAATTCCATAAGA
YFL058W	NSA2	23	TTTTGTTGAACTGGCAACCA		237	TGCATCTGCCTTCATTAAACC		1244	TATGTGTTGCTGGCTGGTTC		1478	GCAATTGGCCCTTTATCGTA
YFL058W		23	TTTTGTTGAACTGGCAACCA		272	ATCATGCACTGCTGTGGGTA		5021	AACAAGAAACCAATTATTAAAGGCTTA		5227	CGGAAGAGGTTTTGTCATCA
YFR015C	GSY1	3	GGCTCGTGACTTACAAAATCATC		202	AGGTGTGGATCATGGCTTTC		817	CACCGTGACTGGAAGAAGGT		1017	TGGAAGAGCCAATCTCTTGAA
YFR019W	FAB1	9	GGAAGAACCCCATGCATCTA		227	TCAGCCTTATCGCCTGTCATT		2169	TCTCCTGCCCCCATTAGATA		2378	TGTTTATTGTCAGTTGAAGAAGCTG
YGL030W	RPL30	12	AACATGATTTTATAACTATTTCGCTTT		202	TTCTTACAGGGGCCACATTC		2669	CAGATTTCGGAGGTGTGGTT		2862	TCTCCAACTTCTCTGCTCGAA
YGL031C	RPL24A	2	TGAAGGTTGAAATCGATTCTTTT		240	TTTACTCCCACCAGCAAAAG		1236	CGTGGGTTTTGCGTACTTT		1415	CTCCTAGGTAATTGTTTATAACGAAAA
YGL078C	CMK1	17	TCGCAGACAAGAAGAGAAAGG		205	TCTCAGGTGATGTGCAGAAAA		2127	AGCTCCTTTCTCGGGAATTT		2374	GCCATCGATCAACCTCTTG
YGL091C	NBP35	28	GACGAAGTGCTACCAGCAGA		235	TGATTAAAGCAGGCCCTATGA		1065	GTCTATTGAAGCCGCCAATC		1274	ATACAATCGTCCCCCAGTTC
YGL137W	SEC27	20	TATGTTACCAGAGCGCGTTT		206	TCATCACATGTTTTTGGTATGGA		1794	CAATCCGCCTTTCAAGAGAA		2025	TTCGTCCTCTCTTCTCAGTTTAAGA
YGL158W		30	TGGCATCGATTTTTATCCAA		210	CCAAGAAAAACCATCTGTCCA		1130	ACCGACAACCAAAACCAGTC		1350	TTGGTGGGATTTAGGATTGC
YGL178W	MPT5	29	TATTTTTCTTCGCCAATGGA		193	CCGTAACGGATTGGTGAAGA		6929	CACATGGACGTTCTGATTCG		7126	TTCTTGGCTTTCCATTCCTG
YGL180W	SDS23	24	TCACACAACCTCTGTGAACCA		239	CCTGTAACGAGCCAACCTGT		1481	CCGCCTCCTTTCACAATAAA		1730	TCTTCTGGTGTATCGTCCTTTTT
YGL195W	GCN1	2	TGACAGCTATCTTAAACTGGGAAG		235	TGATTAAAGCAGGCCCTATGA		1065	GTCTATTGAAGCCGCCAATC		1274	ATACAATCGTCCCCCAGTTC
YGL206C	CHC1	22	TTTACCGAATTGGTCGATCTG		251	CCACCATTAAAGACAAAAATAGGG		2275	GGTAATGCCAAGAATGATGC		2493	TCAGCTAGATAGAGCTGTTGTAGTAAA
YGL251C	HFM1	9	AAAGTTTGATCGCCTCGGTA		190	TTTCCGTCTTGAGCTCTTGG		1345	TCTGAAATTCCACAGCAAGC		1550	AAAAACCCACAAGATGATTCTG
YGR019W	AMS1	30	AGAGCCAACCAAACCAACTG		248	CTGCCTTTCATGGGAATCAT		1140	CGTTACATCCAAGCGGTTTT		1383	TCAGGAACGTTCTCTTGTCAAA
YGR023W		12	CAATCCGACCAGGAAGAAGA		244	TTTCGAACTTCCACAAAGCA		1170	GTTCTTGAAGTCCGGTGACG		1358	TGAGCAGCCTTGGTAACCTT
YGR032W	GSC2	11	ACGATCCAAACTTGAATGGAC		189	TGCAGCCTTTATTTCAAACG		2224	GCCCAACTAAAGAAGGAACG		2427	CTTTCCGCCACGTAGTTTTC
YGR067C	POX1	1	ATGGCTGCGGGTCAAAAA		243	GTCGATATCCATCGCATCCT		1289	GCTTTGTTTGTGGTGCTCCT		1519	CCACAGCTTCATGGGAGGT
YGR094W		28	AAGACATTCACTTTTCGGCTTT		249	TACAGGGCTGGAGCTTTCAT		848	CTTTTGTTACGGCTGGTGGT		1073	TCTTCATCAGTTGTGGCATGT
YGR098C	ESP1	16	GAGGAACCGCTGAATGAGAT		218	GCCACTGCAGAAGTAGGTTCA		1365	AACAGGCACAGCACACACTC		1548	TTTCTTAGTCAAATCGACGTCCT
YGR138C	MSB2	25	TCATTCAACTCACAAAACACTTCC		229	TTTCCAAGCAGCTCTGTTCA		1345	GCATTAAGCTGCCAATCTGA		1525	TCTTGTTCTTCCTTCTTCGGTA
YGR146C	YGR146C	25	TGCACTGTTTGTGATCGTCTC		260	CCGACGATATGAGGATGCTT		2495	TGGACGATGATGATTTTACGA		2684	TGGTTCATCTTCTGCCTCAA
YGR148C	RPL24B	23	TTTCCGGCGCTAAGATCTAC		245	CTGAAACTACCGCCACCATT		2607	GGAAGAGGAGAGACAACGTCA		2852	TCGTCATCACTTTCTCCCATT
YGR162W	ORM1	22	CCGACACAATCTGCTTCAAA		275	GGGAAGTCCAATGTTGTGTG		961	ATTACGCAAGTTTTGGCACA		1177	TGGCATCAATCTCGTTCATT
YGR184C	UBR1	1	ATGTCCGTTGCTGATGATGA		270	GTTGAAAATGCCCCTGTCAT		1492	CCCGACAAGTTCTGGTTGAT		1683	TTATGGCTTACAGTTGTGCATTATT
YGR204W	TWF1	29	CATGCGCTCAGCAGTTTAGA		250	GTGGGTAAGTGGCATTTTGG		2024	CGTATTTCAAGCCCCTTTCA		2262	TGGTGACCTACACACAGGACA
YGR211W	ZPR1	2	TGAGCGAACAAAAGGAAGATT		262	TTTCTGAGGATGCAGCATTG		1932	ACATGAAGTGGCGGAACAGT		2178	TGGTTGAATGTTTTCATCAGAAAG
YGR217W	CCH1	9	GAGAAAAAGGACGCTTACGG		224	CCGAAGGTGGTGATGATACA		1474	GGTTGGGACCACCTATCCTT		1689	TTGCTTAGCGTTGGTAGCAG
YGR225W	AMA1	3	GGCTACTCCCCATTTATATCACA		180	AACGCATTGCGGTAGTTTTC		1885	GCGTTTGAACGCGTAAGTAG		2070	TTTGTCAATGGACCAAAGGT
YGR271W	SLH1	2	TGTCAACTGAATACTCTGCTGATTC		211	CCAAAGTTTTTCCGGAACCT		1601	CAGCAAGAGTGCAACAGCAT		1780	TGAAGTTCTTCAACGGGTCTACT
YGR286C	BIO2	29	CTACCGCTAGACCGGCTTT		216	TGTCCCAATGCCTTCCTTTA		1042	GAAGCAAAGAGGAGAAAGGATG		1222	ACAGGGAAGAAAAATCGTCAA
YGR296W	YRF13	2	TGGAAATTGAAAACGAACGTA		220	CTTCGTCGGTTGTTTCTTCC		1878	CGATCCAAATTGGGTGGATA		2114	TTGTGGAAAATCTCCCTAGCA
YHL009WB	YHL009WB	10	CCAGTGAGGGATGAAACAAGA		251	TTGTTATCCGGTCTCGCAGT		1990	AGGCTTGACATTTCGCACA		2217	TCCAAATTTTCTCCATACATCTCTT
YHL022C	TDH3	29	ATAAAACAAGGCAGGAATTGG		262	CCTTGACATCTTCGTCAGACA		2298	TACCGTCAAGGCCTACTTGC		2502	GCCTGGAACTTCTTCCTTCA
YHL030W	ECM29	18	CGAAGCGAAAGAAAAACAGC		206	TCATCACCCTCAACATCAACA		1150	GGGACGAAATACTCTGTGATTG		1347	CCACTTTTCAGTGATTTTCTGC
YHL035C	VMR1	3	GGGAACGGATCCCCTTATTA		244	TTTCGAACTTCCACAAAGCA		1170	GTTCTTGAAGTCCGGTGACG		1358	TGAGCAGCCTTGGTAACCTT
YHL050C	RPSA	12	ACCCTCTGTGGCAGTACAGG		186	TTTTCCTAAGTGTCGGTACGTG		786	TCGGTTTGTCCAAGGAAGAT		1033	TCTGATTTCGGCCTTTTCAG
YHL050C		12	ACCCTCTGTGGCAGTACAGG		231	ATCCCGCAATGCTTATCTGT		823	GTGGTCGTAACTTGGGTCGT		1032	TTCTGTCACGTTCTTCAGCAA
YHL050C		12	ACCCTCTGTGGCAGTACAGG		224	TCGGTCGAAATTCTCGTTCT		762	GGGTGAAGAATTTGCGAAAC		984	AACAAAGATATCAATGGCAGACA
YHR016C	YSC84	29	GCTTGAAAAGCGAGACCAAG		194	GCGAAAAACATGGATTCAAA		2243	TCAGGGAGAGTTCAGTCTTGG		2483	TCCTCCGTTAAACCCATTTTC
YHR020W		14	AAGCGTTTGCCAAGTTGTGT		202	CACTGGCCACACCAGTTCTA		891	CACTAAACCAAAGGGCCAAA		1087	CATCTTCGTCTTCCAAAATGTG
YHR021C	RPS27B	25	CATAAGATGTGAAGGAAACAGAAGA		200	GATGGTGGAGGAACGTCATT		979	TATTCCAGAGGTGGCTACGG		1224	ACGTGGAGCATCTCTGGTTC
YHR023W	MYO1	9	CGGGCAGTCTTGCAGTTC		226	GGTTGGACAAAGTCCCAGAG		912	AATGGACCCAGATGTCCTTG		1152	GGTTTTTATTTCGCGGATAGC
YHR027C	YAP182	7	GACGAAAGTGATAAGAAACAACAGA		238	TCAATTCATCCTGCTTCTCAAG		952	CTTGGTAAAGCCGGCAGAT		1172	GCATCTTTGCCTCTTGGTCT
YHR099W	TRA1	24	GCAATTCGCCAGTAGGTTTC		222	CTCCACCATCTCAAACGTGA		1651	TACTTAGGCGGTCGAATGCT		1871	TGTTTGACACTGGTGATTTGC
YHR165C	PRP8	19	CCACCTCCTGGTTTTGAAGA		250	GACCCAACTCTTGGATGAGC		1274	ACGAAGGTTTGCAAAAATGG		1498	CTTCGTCCAATCTAGCAGCA
YHR177W	CUP1-2	30	GTACATCGACGACGAGCAAG		193	TTTTTCCAAATTTCAAGCCCCTA		1195	ACATCGTTATGTCCGGTGGT		1412	AGATGGACCACTTTCGTCGT
YHR186C	KOG1	15	TGGACCTCAGCCATTAAAGC		233	AACGCTTGCTTGACCAAATC		1809	TGGTTTTGTTCCAGCATTGA		2037	GACAGCAATACGTTCACACTTGA
YHR203C	SAE3	2	TGGCTAGAGGACCGTATGTTG		256	GAACGGCGGTCATAGAACTC		2751	CGATGAGGGAGAGCCAATAA		2937	GCCCTCAATATGGCTTGTGT
YHR205W	SCH9	19	TCAAAATCGTCGAATCAGGA		274	TCGAGGAAGCCTTTGGTAAG		1323	TGCAGAAGTGGAAGAAACCA		1504	TTTTCTTCTTTTTATCCTTCTTTTCC
YHR214CB	YHR214CB	8	CCCAACAATTATCTAATTACCCACA		249	GTCATTCGCAGTGCCATCT		1385	CACCGCCATTGAATTTACCT		1593	TGGATGGTAGCCATTATTACGTC
YIL033C	FUR1	29	AAGCCGAATTGCAACTGTTC		230	CGGAACGCTTTACCTGAAGT		888	CACTCAAAGGCACATTGCTG		1072	CTTCATCAGCAGCTTCACCA
YIL052C	RPL34B	2	TGGCTCAACGTGTTACTTTCA		201	GGCCTTCGAGGTGAAGTTTT		1243	ATGACCACGAGAGGATTTGG		1453	GGTATTGACCGACCCACTTG
YIL069C	RPS24B	23	AACCAGCAGAAATTGAAACAGA		207	CTGATGGAGGACCATTGCTT		3061	CCAATTGGTGCTGAATGG		3264	ACCAATATTAACTTCTGTATGGATTGT
YIL080W	YIL080W	14	ATCAAATCCCAGGAGGAGGA		224	TCCCGAAAATTCAGCTTCTG		3637	CAGATTTCGGAGGTGTGGTT		3830	TCTCCAACTTCTCTGCTCGAA
YIL129C	BET1	2	TGGCCTCGAGATTTACTTTCC		202	AGGTGTGGATCATGGCTTTC		817	CACCGTGACTGGAAGAAGGT		1017	TGGAAGAGCCAATCTCTTGAA
YIL129C	TAO3	2	TGGCCTCGAGATTTACTTTCC		201	TGCATCGGTACTGGACGTAA		1416	CGACGACGCTAATGATGAAA		1634	CCGTTGTTTGGTTTCGTGTA
YIL149C	MLP2	28	AATGTTCCATTCGAATCACTTC		202	TTCTTACAGGGGCCACATTC		2669	CAGATTTCGGAGGTGTGGTT		2862	TCTCCAACTTCTCTGCTCGAA
YIL173W	VTH1	5	CATTGTTTCGTGCCCTGTAT		197	GCGCCTGAATGAACAAATCT		828	CATTACCGTGGAAGGTTGCT		1009	TTTTCACTCCTCCATCTGGAAT
YIL177C	YIL177C	9	TTCCGATAGGCGTAAGTTTGA		246	GAGGTCTCGGAATGGATTGA		3459	TCCTCCTCAAAACAGGGATG		3638	TCTTCGTTAGCCTCCTCGTC
YIR029W		15	TTTGGCAGATGAGGCAGAAT		211	TGTACTTCGCATTCAACTCCTC		991	TCCAGAAACAATTCCTCATCATT		1181	GGGACAATAGCTGCAGAACC
YJL005W	CYR1	28	GAAATTTCTGGCCCTCAGC		221	CCGTCATCTTTGTAGGACACC		2270	TGACCATTGAAATGCTGGAG		2502	CAAATCCTTTGGATCACATGC
YJL039C	OM45	8	GGTCTGCAATTCCTTTCCAA		205	TCTCAGGTGATGTGCAGAAAA		2127	AGCTCCTTTCTCGGGAATTT		2374	GCCATCGATCAACCTCTTG
YJL039C	NUP192	8	GGTCTGCAATTCCTTTCCAA		256	TGAAACTCGCTGGTAAGGATG		2166	GAAGCTGAAAACGTGGGAGA		2369	GGAGAGTTGGCGCTTACTGA
YJL041W	NSP1	11	TTTCCATTGGACGGTTGTCT		226	CCAATGGCTCAAGATCTTTTT		1147	ACCTCGAATGCCCTTTTAGA		1384	TTTTATATGTTGCGGATGAATTATTA
YJL088W	PRI1	1	ATGTCAACCACAGCATCCAC		202	TTCTTACAGGGGCCACATTC		2669	CAGATTTCGGAGGTGTGGTT		2862	TCTCCAACTTCTCTGCTCGAA
YJL105W	DAL81	27	TCGTCATATCAGGCAAGGAA		308	GCCAACAGACCCTCACTGTT		785	CCAACCCACCTCCACATACT		1028	TCGAGAAGACCTTTCGATTCTT
YJL109C	UTP10	28	CAAGTTGCTTCCAACAATGC		226	TCCAGGCAACTAACTCGTCA		2049	TGGCAACACTGGGGATATTT		2253	CCGGTGGTCGTGATTGTAA
YJL113W	YJL113W	14	TGAGGGGTGAAACAAGAAATG		237	GTAAGCACCGTCAGCAGTCA		1017	CAGATACTGGTTGGCTGCTG		1215	TTGCCAAACTCTAATGACGTTG
YJL130C	URA2	5	CCACTATTGCTCCCACTGCT		206	AGGGCAACATATACCCCTGT		792	GTCCCTATGGCCCAGTGTAA		993	AAACCAAGGGTGATGCAGAG
YJL157C	FAR1	8	CACCAACAAGAGTTTCGTTTGA		224	GCGGCCTTCCTGTAGTTAAA		1310	ACCCCAGCAATATGAGCAAT		1542	TCCTTCTTTTCCGTTAGTCCTG
YJL207C	YJL207C	5	CAAACCGATCCCTCAAGAAA		209	CGCAAACTTTCTCCAAAAGG		1041	CCATTCCCAATGGTCAATTT		1263	TTGGATGTTTAATTGATAAAGCGTA
YJR066W	TOR1	12	TGAGGAGCAGATTTGGAAGAG		235	ATGAGCTTTTTCGTCCGAGT		1421	GCTGTCTGCATGCTATCCAA		1616	AATCGGCACCCACTTCAATA
YJR079W		70	GAAGCCTCGCAACTTAAAGC		252	AAACCCGTTTCCTCTTTTGG		1501	TCAGCTTCCGCTAGCTCTTC		1717	GTGATGAACCAACCGTCTCA
YJR138W	IML1	14	TGCATGGGAAGAAACAAAGA		197	CGCTCAGGTGAAGGAGATTT		1584	TGGATTCGGTGATACCAAGA		1779	TTTCCTCCTTATCGTTCCACA
YJR140C	HIR3	12	CAATGCCCTCAATTCAAACA		247	CCTTTCCCCCGTCTATCAGT		1584	ACCCTTGCGAAAGATTGGTA		1789	CGATGAAGGTGCAGAAACAA
YKL014C	URB1	9	TCATAGCGAAGCCTATGGATCT		210	TTCTTCTGGACAGAGTTCATGC		1737	TTATCATGCCAATGCGAATC		1970	CAGTAGTCTTTAAAGCATTGTAAGCAA
YKL034W		3	GGAAATCGATGGCAACACTC		244	TTGTGTTACCGAACCAACGA		1794	GAAGGATGCCACGGAGTTTA		1989	TGCCGTCTTCTCAACTTCTTT
YKL112W		17	TGAATTATTATGAATACAAGCACCCTA		241	TGATTGACCTGTTCCGAAGG		2354	AAGACAGCCCAGACTTTGGA		2579	TCGAGTTGATTTGTTTTTCCAG
YKL163W	PIR3	16	CCATTAGTCGTCTCCGCTTT		260	CGAGGGGAAGCTATAGATGG		2387	TGTCCGATCCGAAAGAAAAC		2624	TTGTTTTCAGCGGAATCCTT
YKL182W	FAS1	2	TGGACGCTTACTCCACAAGA		197	TCTTCATCCCAGTTTGGTTTG		2391	CTTCACCGAACAAAACAAAGG		2622	GTTACCCCAGCCACCATCT
YKL193C		20	ACAAAGATAGTGAAGAAAAAGACGAAA		199	TCAAATAAAGGAAATGCCAAGA		2658	GCCCAACCACTCATTGACTT		2844	GCACTGCCTCTCCTTGCT
YKL203C	TOR2	18	CAAATACACCACGCCACCTA		200	TGCATAAGCAGGCAACTCCT		2889	AACCGAGGGAGGATATACGG		3093	TGTCGCCTTTTGCAATACTTT
YKL221W	MBR1	7	GAAGAACGGCATGAAGATCA		274	TTTGCTCATTTTTGCCTGAG		3033	CTTTTGTGCCTCGTATGCAA		3215	GCAAAGTGAATTGAAGTTCATCAG
YKR031C	SPO14	27	AACTCACTTCGCTCCACCTC		184	CCCACAGCTGATTCAAAGTG		3299	CACTGGGCAAACCATTTTCT		3541	GATTGACCCAATAGCCATCAA
YKR054C	DYN1	2	TGTGCAAGAATGAGGCAAGA		189	AGTCCAGAAAAACCACTTTTGG		3460	CAAAGCAGTGGCAAGAAGAA		3694	CCCAAGAAATCCAGATCACC
YKR095W	MLP1	23	TGGAAAGCATACAAAATGGTG		235	CCTTTATCCAACGTGCCACT		14482	CGCCGTGCTAGAGAAAACA		14703	ACGCAAAATCAGTGAAAGCA
YKR105C	EAP1	23	CGCAGCAGGAGATAGAAGGA		194	AGGAAGACAAACAACGTGTCG		12028	CTTTGTGCGCACGTATTCTG		12251	GAGCTAGCCACCTCTTTAGCC
YLL015W	BPT1	30	CCCCTATGGATACCGACCAT		223	ACTTTTGTTCCGGTGAATGC		10991	CCCTATTCATCCGTGACGAG		11225	GGCATGAAGTTCACGTCTGTT
YLL034C		12	AAAGTCGAAAAAGAACTCATTAACAA		199	TTAACAACAGCCCGTCCATT		9561	TGCCAAGTTGTTGCAGTTTG		9791	CCTTCATGCCCTTCATTGAT
YLL040C	VPS13	26	TGCTAAACCGATTGCTAGGC		216	ACTTGACCATGGGACCGTTA		9177	GCCAGGCAAAGAACTAGCAG		9381	CCTGTACAAGGACCGACGTT
YLL048C	YBT1	25	AGACCTGACCATCGGTTTTG		208	CGATAATCGGGTTCAAGTCC		9027	ATCTGAAGCGGTTGCTGTCT		9274	AGCACGACATTCTTGCCAGT
YLR024C	UBR2	4	GAAGATTCTGACCTGTCTATAACCAA		236	GTGCCTTCCACCATAGCATT		8994	TTGTGTTCCACTTGCTTTCG		9238	AAGCAGAACATGACATCCTTGA
YLR042C	YLR042C	22	TCTTTAGCTTTCGCCCCAAT		189	CTTGATTTTCGCTCGTTTCC		8583	AGTTCGTCGATCCCAGGTAG		8804	GCGGTTTGGTGAGTGAATTT
YLR044C	SRL3	15	TTTGGGTAAATATTTGTTCGAAAG		229	GCTTGTTTGTGGTTGACACTG		8168	TCGATAACGTCAGCAAGTTCA		8362	AATAAAAAGGTGACCATCCCATA
YLR054C	OSW2	20	CGTGCTTAATAGGTATGGCAAA		253	GGGAACTACTGCCTGCAAAT		8047	CAAAGGAACATGCAAGGGATA		8233	CAAATGATCGGCTTTGTGGT
YLR061W	RPL22A	1	ATGGCCCCAAACGTATGAT		191	TTGTCTTCGTAAATCGTGAAGG		7799	AAATTTCAGATCGCGGTAACA		8003	AATTCAACACCTCCGACAGC
YLR079W	SIC1	20	CAAGGTCCAGAGGGACTAGG		190	CAGCAAAACGAACGGATTTT		7684	TTGTCCAACCAAACTTTGAGG		7875	TTCAGGCTCCGTGTAGGAAT
YLR087C	CSF1	10	ATTTCACAATTACGTGGTGTTCC		201	TGCAAACTCCGTAAATTTGG		7292	CTGCTGTCAAACAGACCGTATT		7479	GGCTCTCTTTCTTTTGTTACGTC
YLR089C	ALT1	13	TCTGCCAAAAATCACTTCACA		254	ATTCCGGGTTTCCAACCTAT		7214	TTGGTAACAAATTTTTGCCTCAT		7446	CGTAACAGGGTAAAATGGCTTT
YLR106C	MDN1	2	TGTCCCAGGATAGAATTTTGTTAGA		204	ATGACCAGCAGAACCAGTGA		7216	GTTCAAAGGGTGGAAAACGA		7425	CTACCAGAATGGACACCAACC
YLR182W	SWI6	4	GCGTTGGAAGAAGTGGTACG		193	TACTGCCAATCACCACTCCA		7183	GGGGCAATTACTGTCGAAGA		7408	AGAATGGGCACCATCCAATA
YLR197W	SPC3	25	TTTGAAGAACCTACTGGTTACGC		220	GCGGTGGTAATGTGAAGTCC		7003	ACGCATGCCCAATTACTTCT		7228	CGATTTGTTCGGCCTCTAAC
YLR247C	YLR247C	15	TGCGCTATTAGCAAGGGAGT		193	CCGTAACGGATTGGTGAAGA		6929	CACATGGACGTTCTGATTCG		7126	TTCTTGGCTTTCCATTCCTG
YLR266C		1	ATGGATGGATCCCATTTTCC		262	GCAAGAAGGGGTTGTACTCC		6891	AGCGTTGATGAATGTGATCG		7106	TACCAAAATGGAAGCCAACC
YLR276C	SMD3	16	AAGTCTGTGGAAGGCGCTTA		225	GCTTATTTTTGGCACGGAGA		6566	TGGCCAAAATGAATGTGATG		6788	TCCATTGCTTCCCTAAAACG
YLR305C	STT4	16	GGATTGAAAGCCTCTTCATCTTT		213	GGCGGCAATACCATTATTTG		6468	ATCGTGGTACCCTGCTTCAG		6691	TCTTCAACAATTTTTCTTTATCATCG
YLR310C	CDC25	25	CCCAATACAAGTTCTGCAAGG		248	ATGGGGTCGCAAAATAAATG		6465	ATACTCAACGGCTCCTGTGG		6672	TGGGATAAATGGGCTAGATGA
YLR342W	FKS1	26	AGGGCCAAACGGACTATACC		245	ATGTTCGTCAGCCACCCTAC		6425	TGCAAGAACACCTGATTCAAA		6664	TGGTCAAATCAGCAATACAACTC
YLR422W	YLR422W	1	ATGTCGCAACAGGATTCACA		188	GGATCGGTCACAGATTCAGG		6426	CCCTGAAGAATATGCACGTCT		6620	GCCAACAAAGCCATTCTGA
YLR423C	YHC1	26	TTGTTAATAATGCCAGGAAAACG		200	GAGACCGGAGGAACATCAGA		6349	CCAATCACTGGTGAGCCTTT		6558	GCCTCTCGCTGTTTTCTTCTT
YLR430W	SEN1	2	TGAATTCCAACAATCCTGATAATAA		262	AGGGTGGAAATACGGAGCTT		6280	CCTACATGCTATTACCAAACTTTGAA		6500	TGCTTGAAATAATCATTTGGATTC
YLR440C	NKP2	28	GCTTGCATTTTTGCATCTAGG		263	GATGCGCTCTTTCCAGTTTT		6295	TGGTGGTTGGTTTTAGGTGA		6477	TTCAAAGGACAACTCTTTATCTGC
YLR454W	FMP27	2	TGATGTTTCCGATTAATGTTCTACTG		270	ATCAGATGAGACGGCACCAC		6167	TCAATGGCAACGATAACGAA		6400	CACGTTGAACGATACCACCA
YML015C	RSC2	26	ACACCATCCCGAAAGTGAAC		207	GTCCTGTAGCGTTGGGGTAG		6208	TCAGCGTTCCCCTATGTTTT		6405	ACCCTCCAGGTCTTCCAGTT
YML024W	RPS17A	22	AAGGAGGCTTTTAAGGACACG		250	ACGGATTTTCAGAAGCATGG		6137	TGAAGTACGACGACCTGTTGA		6362	CGCTTACTGTCCACCAACCT
YML034W	SRC1	21	TTTAGAGGACGGTTTTGATCC		240	CGCTTGTAAAATATCCCGAGAA		6115	CCACATACCTGGGGTGTTTC		6319	TGGATTGTAGAGGGGTTTGC
YML059C	YML059C	15	TTGCACTACGAACAACACCAA		246	CTGATCGAATTGACCGACCT		5919	TGTTCCTTTCCATTCCACCT		6136	CCCAGTTGTCGATGATTTCC
YML103C	NUP188	13	TCATTTGGCAATTCCTCTCC		192	ACTGTGGATGCTGCTCTCTG		5887	CCCGAATGGGATGTTAAAGA		6104	TCATTTGCGCTATCGTCATT
YML124C	TUB3	24	TGGTATGTATGCGTTCCTTTTT		234	ACTCTCCCTGCTTTTGGTCA		5880	TTCTGAGAAGGATGCGTTGTT		6068	TCCTTTGCGTTCTTAACCATTT
YML131W	YML131W	8	TGGCTAAACAATGGGTTTTGA		253	TGGAAATCGTATAGAGCTGAGACA		5790	GGCATCATTGTCAATTGCTT		6026	TGAAAGGCCTCTTCGACA
YMR109W	ATR1	2	TGGCTATCTTAAAAAGAGGAGCTAGA		266	TCATGGCGTTTGTCATTTGT		5839	GCCTGGCGTTCAGTGATAGT		6020	GAAAGGTATAATTCACCAACTCTGC
YMR116C	ASC1	3	GGCATCTAACGAAGTTTTAGTTTTG		248	TGCAGTTGAGCAAATGAAATG		5633	GCAAGCACCTTTCTAGTAAGCATAA		5879	TCATAACGTAATCCTAAAGCGTCA
YMR142C	RPL13B	2	TGGGTATGTTGAACTGAAGCA		198	TGACGAAGATGCAGGTGAAG		5623	CTTGCCACAAGGGGTGTTAT		5831	GCCTCACCTATGGATCTTTCC
YMR162C	DNF3	10	GCTGATGGGCAAAGAAGAAG		220	TTTGTTTTGGATGAGCATTGA		5630	GTGGCGGAGTACGTGATTTT		5843	TCTCGCTCATCAGAGTCATCA
YMR169C	ALD3	23	TCGAAATCCCACAATTGAAA		246	ATTCGCCGAGTTCATATTCG		5552	CTGGAAGGGATCATCACACC		5795	CCCGAATGTGAGTAATCATGC
YMR173W	DDR48	3	GGGTTTATTTGATAAAGTGAAGCAA		194	TCGGATATTCGTACCTGCACT		5551	AGAAGCGAATTTGAGGAAGC		5782	TGAAAATTTTACTCTGTGCATTGTT
YMR199W	CLN1	24	TGGGTTAATTGTCACTGCAAA		216	CTCGCAATCACTTGAAGACG		5492	AAGCCCACACAGAAGCAGAT		5728	TTGAGTAATATTCGAGCCTCATCA
YMR207C	HFA1	12	AAGAAAATGGGCGTACGAGA		181	GCAGGTGCAAATCTCTAGCA		5534	CAGATTTCGGAGGTGTGGTT		5724	TCTCCAACTTCTCTGCTCGAA
YMR219W	ESC1	19	ACCTTTACTCCAAGGGCAAAT		229	TTGCAACACAAAGCGAAGTT		5481	CGTGGAGGCCATAATTGAGT		5703	TCAGTACGGAATGCCATTTG
YMR229C	RRP5	2	TGGTAGCTTCCACCAAAAGAA		233	GGACCTTGGTCTTGTGAAGG		5480	TGATCATATTCGCGGGATG		5672	CAGGTCTTTAAGGATGGCGTAT
YMR247C	YMR247C	2	TGTCGTTTGGTGGAATCAAT		251	ACATTTTTCCCGACCATGAC		5471	CAGATTTCGGAGGTGTGGTT		5653	TTCTCTGCTCGAATCCCTACA
YMR252C	YMR252C	28	ATCAGAACAAGAATTGGGTTCA		183	CAAGGTTCTTTGAGCCATCC		5443	GCCAAAGAGGCTGTTTTCAA		5637	GACAGCTTGGAGGTCATCGT
YMR269W	YMR269W	25	TCATATGGTTGGAAAGAAGGAGA		260	CCGTCTTGAGCAGCCATATT		5375	TGCGTAAGCGTATGGTCAAG		5613	GGTCTTTAATGATGGCGTATGA
YMR306W	FKS3	17	CCAAGTTTTCGCTAACTGACG		244	ACTCCAGGGTCCTCCACTTT		5371	GTTTTCTTAATGACCGGCACA		5617	ACATAGTCTCCCACCCACCA
YMR316W		30	GAAAGCAGCAGATGGGCTTA		234	CCTCACAGGAAGCTGAACCT		5401	GTGGGGAGACTATGGGATCA		5585	TCCAACTCAATTCTGCTCGTT
YNL012W	SPO1	2	TGCAAAAACTCCTCTTTGTCTTT		188	GTAACACGCGTTTCCCATTT		5391	TGATCTCTTCGACCCCGATA		5601	TCGTAAAGTTTTGATGAAGGTGTC
YNL054WB	YNL054WB	28	TCACCCATTTCTCATGGTAGC		256	CAGCAATAGGGACACCGTAGA		5307	GTATTCTGGGCGTTTTTGGA		5492	ATGACGGCCACTATGTCACC
YNL085W		15	ATTGGAATCGTTCCTTTTCG		226	CAGCCTCAGAAAGTTTTTCCTC		5192	CGCAGCTATCAACAACCAAA		5402	TTGAGGCCAAAATATCCTGTG
YNL096C	RPS7B	2	TGTCCTCTGTCCAATCCAAG		209	TCCTCTTCTGCCTTTAAACCAT		5189	CGCAGCTATCAACAACCAAA		5399	TTGAGGCCAAAATATCCTGTG
YNL112W	DBP2	6	TTACGGTGGTAGAGATCAGCAA		235	TTGTGCTTCCACTTTCACCA		5163	CGCTTATACCACACCCCTTC		5400	TGTCGTTTGATGGTTCTGTTG
YNL130C	CPT1	20	AGAGTAGTTTGGGAAACTTGAAGC		251	ACATTTTTCCCGACCATGAC		5194	CAGATTTCGGAGGTGTGGTT		5387	TCTCCAACTTCTCTGCTCGAA
YNL139C	RLR1	2	TGGCAGAACAGACGCTACTTT		193	CTGGAACAGCTGATGAAGCA		5145	CAATTACTAAAGGATTACTAACCGACA		5374	CCATTTGTTTGTTAATAGTTTGAATG
YNL172W	APC1	24	AAATGATTATTTACCAAGGGAAACTC		192	ATTGAGCAACGGTTTTAGCC		5142	TGAAAAGTTGGCTAAAGAACTGG		5362	GCCCTTCTTCCTCGTCTTCT
YNL175C		13	GAACTGTCGAAAGAAGATGCTG		200	GTACGACTTGCCCTGGAGTC		5153	TGATGCTAGGTGTGCTCCTTT		5355	TGCGACAGTCCTAAAGGTAGGT
YNL197C	WHI3	22	GACCAAACAGGGTCATTTGC		190	GAACAGCTGATGTCCCAGGT		5042	CTCAGTCACCTTGTGCAAGAA		5284	AAATGTTTTTATCGGAAGAGGTTT
YNL197C	MSK1	22	GACCAAACAGGGTCATTTGC		259	ACGTCGGAGAAGAGCCACTA		5060	TGAAGCTTCCAAAACTTGGTG		5307	CGTTTCATCAGAATCGCTCA
YNL242W	ATG2	29	AAAAGCGGCTGCTTCTTTAC		216	TGTTCTTGAGAAAATGGCAAA		5089	GCTTCCTGTTCCTCCAATGA		5271	TTCAACAACCTTGACCAAACC
YNL262W	POL2	26	ACGGAGGATCTTCCACTGC		190	CCAATTGAGCACCAAATCCT		5033	GCAGAAACGGTATTGTGTCG		5275	CAACATTGTCGCTATCACCTTC
YNL271C	BNI1	11	ATTCAGGCTCCAAACATTCG		193	CTGGAACAGCTGATGAAGCA		5022	TCGACAAGAAACCAATTACCAA		5244	TTGAATGTTTTTATCGGAAGAGG
YNL295W	PSD1	24	GCTTGTACTGTACTGCCCCAAT		217	GCTCCTTTTGCAGTTGTAATGA		5018	CTGCATCTCAACAACGGAGA		5235	TGGGGCAATATTATCGTTATCA
YNL297C	MON2	26	ACTCCATGCAAAGGCAACTT		272	ATCATGCACTGCTGTGGGTA		4980	TCAGTCACCTTGTGCAAGAA		5224	TTTAAATGTTTTTATCGGAAGAGG
YNL298W	APC1	10	TCAGCTGCAGCGAATAAGAT		228	CCCAGCTTTGATGATCTTTTG		5048	CGCAACTGGTTGAAAGTTTG		5244	TTCATCATGTGGTCCAAAGC
YNR016C	ACC1	5	GCGAAGAAAGCTTATTCGAGTC		250	TGTGACCAAAATGACCAGGA		4936	AGTTACAGCCCAACGTCACC		5171	TGTTCGTCTTGCTTTGGAGA
YNR031C	SSK2	26	ATAAGCCTTACGGCGATTCC		226	TTGCTGGTTCAGATGCTTTG		4980	CCAGGAAGTGAAGGCAAAAG		5173	GAGATTCATGGCTAGCGACA
YNR053C	NOG2	28	AGACGTATTCGTGAAGGTGACA		196	AACCTGAAATGCCTTGCTGT		4927	GAACTGGAAAAAGTGGTTACGAA		5107	CACTCGCTTCTGTCATGCTC
YOL016C	RPS19B	4	CCCAAGGAGTCAGAGGTCAT		254	GGCGATAATGAGGATGTCAA		4849	GTCGCGCTGGTAGATGAAAT		5079	TTTGAGATCTTCACCACAACCA
YOL081W	IRA2	1	ATGTCCCAGCCCACTAAGAA		251	TCCAAGTTTAATTCATCGGACA		4842	CATGGGGAGCTCAAACAAAG		5025	TGTGCATAACATCACAATTAGCTTC
YOL123W	HXT17	27	CGACATCTACGGCGATGATA		266	TGGTTCGGTGACACATCACT		4835	AAATGAGAAAAGCCGCTGAA		5037	CATTGGAGAAAGTCTATCCGAGTT
YOL126C	MDH2	8	TCCTTCTGATTCTTTTTCCCTGT		194	CCGGAAACAAAGTCAGTGAAA		4852	CAGATTTCGGAGGTGTGGTT		5042	TCTCCAACTTCTCTGCTCGAA
YOL127W	RPL25	2	TGGCTCCATCTGGTATGTGA		277	TGGAACGTTCTTCATTCAGC		4781	AGAACCCATTCACAGCATCC		5027	GCTTGATCATTTGCTGGACTC
YOL151W	GRE2	17	CAGGTGCTAACGGGTTCATT		216	ACGAGAGGCACCCATAACAA		4785	CGTCGCATCAGTAAATGCTT		5021	TGTAATAAAAACTCAGGAACTTGAGAA
YOR007C		16	GAAGAAATTGCTGCCCTTATTG		234	GTGACCTTGGTGACCTGGAC		4758	TGACATGATGACCAGGCAAG		4989	CGCATTTGGAACCTTTGCTA
YOR063W	RPL3	23	CACCACGTCACGGTCATTTA		246	CGGACTCTGTTCGTCTTCGT		4771	TTGACAATTGCACATAGGTTGA		4974	AGAGTTCAATTTTTCCACAAAGG
YOR080W	SMF1	31	AAATACACCCCGATGTCTTCC		241	TTTCTGGAGCGGTATAAGGA		4723	CACAATTTATCCAATGCACCA		4957	ATGATTTTCCGGTTTTGTGG
YOR093C	YOR093C	2	TGGATTTTTCTATTCCTCCTACCTT		218	CTTCGCCTGGAGGAAATAGA		4794	GGAAACAAACCGCGAAAAG		4973	TTGTCAACACTTGGATGCGTA
YOR096W	RPS7A	5	CTGCTCCACAAGCCAAGATT		189	ATTGCCGCTTGTTTCATCTC		4723	GGGAATGTAGACCATTCCTCA		4967	TCCAGATCCTTTAGCCTTGC
YOR133W	SLG1	15	TGTTGACCAAATGCGTTCTT		202	GATCGCCGGAAGAAGTTACA		4786	AAAAGGTTAAGCGCTGCATT		4968	TTAAACGTCCTTAAATAGTGAATCTTG
YOR178C		20	CTACGTTATCGCCAGCTAAGG		208	CAGAATCACCGCCCATATTC		4708	GAAGGCTTTGTTGCTTTGCT		4941	GTTCATCGCGCTGTTCATC
YOR178C		20	CTACGTTATCGCCAGCTAAGG		191	GGCTTGACGACATCAATCTG		4708	ATTGCATTTGACAGCGTTTG		4934	TCCACTAATAGCCTCACTCTATCG
YOR191W	RIS1	8	CAGTACCCACCATCGACCTT		188	TTTCTCGAATTGGGAGATCG		4680	TCCCATCTTGGGTAATCTAACG		4891	AGTTTATGCCAAATTGTGCTTCT
YOR221C	ARF3	3	GCTTGTCTTGAGAAAGTTGGAAG		205	TCAAGTCATCTGACCCGTGA		4636	ATTTGGGTTTCCCCTAGCAA		4876	CGCAGTTCTGTTTCCCATCT
YOR290C	SNF2	13	CAGCGTCAATTTAGCAACGA		216	AGCATTCCTTGATTGGCAAG		4674	GCGAGCACCAATACCAAAAT		4900	TCGTAAATCCAAGTGATAATTCCA
YOR326W	MYO2	21	ACGATGCTGGTATCCCCATA		217	TGCTTGCAATTTTTGTAAAGTCA		4649	CTTATTTGCTGGGAGGATGC		4876	TCGGTAACCCATAAATAACAGGA
YOR328W	PDR10	27	CTCGGGTTTGAATCAAGGAA		195	CGTCTTGAAAACATGGAATGC		4647	ACAAGCTCAAGACCGTTGCT		4831	CTAACTCCCGACGCCCTAA
YOR341W	RPA190	16	CCGGTTGGTTCTGAAATCAC		192	TGGCTTAGATTGTCGCTTCA		4581	GGGGTACCGTGTCTCTACCA		4800	ATGATTGATACCCGGCAGAT
YOR353C	ISU2	30	GGATCCGAAGGAGGAACATT		207	TATTGAGGGCTGCACATACG		4633	ACTTCAGCACCAAAGCCAAC		4828	AAATGAAGTTGATCACCATTACCA
YOR393W	PNT1	4	TCCATCACGAAGGTACATGCT		272	ATCATGCACTGCTGTGGGTA		4603	TGAAATGCAAAAGTTGATTGGT		4803	TCGGAAGAGGTTTTGTGTTTG
YPL003W	VPH1	21	GCTGAGACTATGGGGAGCAT		244	TGAGGGGAGAATTTTCATCG		4541	CCAACCCTTACCAAGCTTCA		4777	TGACGTAATTCCCACCCTTG
YPL031C	PHO85	21	TGTAGTTTTCTAGTCAAGTATCATTGG		187	CTAAATCGCACTCGGCAGAT		4406	CTGAGGGCGGCTTAAATCT		4655	TCTTTTACCTCACCGGCATC
YPL075W	GCR1	12	TGATCATAACACGCATTCTGAAA		252	AGACCCATCGATTTCCACAC		4570	GCAAAGGGACAGATGAAGGA		4769	GTCCGATTGGACTTGTACTTATCA
YPL081W	CIN1	22	TTCTCCTTTTAAGGGGTTGAGA		254	TGTACAGACAAAAGTTGCGAAGA		4574	ATGTCCCCCACATTGAAAAG		4767	TCGAAATAACCTAGAAGGAGGTTT
YPL082C	MOT1	1	ATGACGTCACGAGTTTCGAG		196	CTTCTGGCAAAGAAGCCTTG		4566	TGCTGCTTTTGTACCAACCTT		4763	TCTTTCGTAACGGCATCAAA
YPL085W	SEC16	5	CACCTGAAGCCAAGAAAAGG		239	TCACCACCATTGTTGACGTT		4503	TCATCATACGGGTGCTTACG		4721	TCCTTTGCGTCAAGGAAAAT
YPL134C	ODC1	22	CCTTTGCCGTTCATATACCA		222	GCCTTCAATGCCTTCAACTT		4499	TTTTGGATGAAGCAGATGACC		4712	GAATCAGGCCTGTCGATGTT
YPL146C	ULP1	2	TGGCTCCAACTAATCTAACCAAG		223	GGCTGTAAACAGCGTTTGGT		4487	GTAGACGGCCATGGGCTAAC		4714	AGGAAGAATCGTCGCCAAAG
YPL231W	FAS2	1	ATGAAGCCGGAAGTTGAGC		211	CTTCCAAAATGGGAGGGTTT		4536	TAAGGGTCACGAGCATAGCA		4717	CGTCTTGAACGACTTGTTGG
YPL240C	HSP82	25	CAAGCTGAAATTACTCAGTTGATGA		231	CTGAGCAGCGGGGTTTAATA		4536	GCAAGACGTAGACCCAACAC		4723	TTCAGGGTGACGTATTGTCAT
YPL256C	CLN2	11	CTGAACCAAGACCCCGTATG		258	CGGTGTTGGCTGAAAGGAAT		4478	GGATGACTTCACCCAAGGAA		4684	CTGCGTTAGTTACGCCTGGT
YPL281C	PRM4	4	TCCATCACGAAGGTACATGCT		228	TGACGATGAAGAAGCAGCAG		4485	TTATCTGCTCGATGGGAGTTC		4682	TTTTTGCTTTTCTTTGGAACC
YPR007C	SVS1	1	ATGGCACCTCTTTCGTTGAA		223	CGCTGATCAAATTGGAAAGA		4458	CGTTTTGGATTCGTTGGAGT		4671	TTCACTACGGCATAATGGACA
YPR080W		25	AACGTTGTCGTTATCGGTCA		266	AGCGTGGACTGAAAGCAAAC		4438	GATGAAGCAACGGCTTCTGT		4675	TCAAATACCCACCTTTCTCACA
YPR117W	YPR117W	14	CGTGGTCTCAAATAAGGGATG		264	TAAAAGGGCCGCACTTACTG		4445	CGACATCTGGAGATCTTTTGAA		4663	CAATTCTCTCGTCTTCACACTTG
YPR157W	SRO7	16	GCGCGAATATTGTTATGGTTC		232	GCCTACCGTTGTTGGAAAGA		4466	CCGTTGAAGAAAACATCCTCA		4655	AAAAAGCAGTTCCATAAGTGTTCA
YPR167C	MET16	22	AATGATATAATTGTCACACAAGAACAG		199	TCCAATTTTCTCCAGCATCA		4396	GCCACTTACTCTTCGCTGCT		4631	GCAGCTGCTAAATCGGACTC
