# Supplementary material for: Regulon-Specific Control of Transcription Elongation across the Yeast Genome
Source: PLoS Genet. 2009 Aug 21;5(8):e1000614. doi: 10.1371/journal.pgen.1000614 (PMC2721418; doi:10.1371/journal.pgen.1000614)
Supplement: Table S5 — Oligonucleotides used for the PCR amplification of the second set of probes printed on the 5′/3′ arrays. (0.05 MB XLS) [file pgen.1000614.s014.xls]

## Sheet: Hoja1
ORF	GENE	5' Probe forward oligonucleotide		5' Probe reverse oligonucleotides		3' Probe forward Oligonucleotides		3' Probe reverse Oligonucleotides
YAL003W	EFB1	CGAATTCCAGCTGACCACCATG (YGUF)		TTCATCATTCACATAAGCGAAAAAAAG		CCGACGAAATTGTCGACGAATTG		GATCCCCGGGAATTGCCATG (YGUR)
YAL038W	PYK1	CGAATTCCAGCTGACCACCATG (YGUF)		GCGTTGTCAATGACAGACTTGTGG		GGCTGCCAATGCTTTGAAGGAC		GATCCCCGGGAATTGCCATG (YGUR)
YBL030C	PET9	CGAATTCCAGCTGACCACCATG (YGUF)		CCTGCGTATTTTCTGTCCAAAGTACC		CAAGCTGCTGGTGTTATTCATAACGAT		GATCCCCGGGAATTGCCATG (YGUR)
YBR010W	HHT1	CGAATTCCAGCTGACCACCATG (YGUF)		TTCTCTCAAAGCAACAGTACCTGGC		TGACAGCAAGGGTATTGATTTGACCA		GATCCCCGGGAATTGCCATG (YGUR)
YBR011C	IPP1	CGAATTCCAGCTGACCACCATG (YGUF)		CCAACGTGGAATTTCAACAACCA		CTGTAGACGCGGAAACCGTTTTTG		GATCCCCGGGAATTGCCATG (YGUR)
YBR025C	YBR025C	CGAATTCCAGCTGACCACCATG (YGUF)		CGGGCTTCTTCTGGATCAATGG		TTGGTCTCCAGACACTGCTCCAGTC		GATCCCCGGGAATTGCCATG (YGUR)
YBR067C	TIP1	CGAATTCCAGCTGACCACCATG (YGUF)		GAATTTGGAATCCACTGTTGCCAG		GCCCTTTCTTCCCCTCATTCTGC		GATCCCCGGGAATTGCCATG (YGUR)
YBR084C	RPL19A	CGAATTCCAGCTGACCACCATG (YGUF)		AAATGGAACACAGTATCGTTCTTGGC		TTGGGTGCTTTGATTGCCTACTACG		GATCCCCGGGAATTGCCATG (YGUR)
YBR106W	PHO88	CGAATTCCAGCTGACCACCATG (YGUF)		AACAATTCTCTTTCTGGCCATTTGG		GGATCCTAGAACATTGATCGGTTACGG		GATCCCCGGGAATTGCCATG (YGUR)
YCR012W	PGK1	CGAATTCCAGCTGACCACCATG (YGUF)		GGGTGGTGTTCCAAAACGTACTTG		TTCACAGAATCGGTAGAGGTGGTCG		GATCCCCGGGAATTGCCATG (YGUR)
YDL014W	NOP1	CGAATTCCAGCTGACCACCATG (YGUF)		TCTACCACCGAAGCCGCCTC		TGCTGCTGGTTGGTCCATCACC		GATCCCCGGGAATTGCCATG (YGUR)
YDL082W	RPL13A	CGAATTCCAGCTGACCACCATG (YGUF)		GCTTGGCCATTACTATGACTGCTCAG		AGAGGTGTCTTCCCATTCGTTTTCG		GATCCCCGGGAATTGCCATG (YGUR)
YDL192W	ARF1	CGAATTCCAGCTGACCACCATG (YGUF)		TTCAACGTTGAAACCAATTGTTGG		CATTGCCAACCACTGAAGCACC		GATCCCCGGGAATTGCCATG (YGUR)
YDR077W	SED1	CGAATTCCAGCTGACCACCATG (YGUF)		TTGGTGCAGCTGTGCTGGTACC		CGATGAAAGTGAATGGTCCGACG		GATCCCCGGGAATTGCCATG (YGUR)
YDR134C	YDR134C	CGAATTCCAGCTGACCACCATG (YGUF)		ATTTACGGTGACGGTAGCAGTGG		TCAAGGCTTTGCAATCCTTGACTTC		GATCCCCGGGAATTGCCATG (YGUR)
YDR155C	CPH1	CGAATTCCAGCTGACCACCATG (YGUF)		CTCTGTGGAATGGAGAGCCAGC		CACTTTGAAGCCTAACGTTGGTTCTG		GATCCCCGGGAATTGCCATG (YGUR)
YDR224C	HTB1	CGAATTCCAGCTGACCACCATG (YGUF)		AGACATGGACTTTTGGGAAATACCAG		CCCATCTGTTGACAACGCCAAAC		GATCCCCGGGAATTGCCATG (YGUR)
YDR225W	HTA1	CGAATTCCAGCTGACCACCATG (YGUF)		TTTCAGCGGCCAAATATTCCAA		TCTGGGCTGGCGCTGAACAC		GATCCCCGGGAATTGCCATG (YGUR)
YDR226W	ADK1	CGAATTCCAGCTGACCACCATG (YGUF)		TTGAGTGCCCTTTGCGATTTGA		CCACTGAAGCCCCAAAGAACGG		GATCCCCGGGAATTGCCATG (YGUR)
YDR343C	HXT6	CGAATTCCAGCTGACCACCATG (YGUF)		TTTGGAATTTCAACGACAGGTTCG		AGTCGACACTGATGAAGCGGGC		GATCCCCGGGAATTGCCATG (YGUR)
YDR353W	TRR1	CGAATTCCAGCTGACCACCATG (YGUF)		TGGGAAACCTGGGAAGTTTTCG		CGCTTTCAAACACAAGAGAGCCTTG		GATCCCCGGGAATTGCCATG (YGUR)
YEL040W	UTR2	CGAATTCCAGCTGACCACCATG (YGUF)		CAATATTGACCAGTACCACATTCACCA		CCTCCCGAATTATTGAAATACGACAGG		GATCCCCGGGAATTGCCATG (YGUR)
YER056C	FCY2	CGAATTCCAGCTGACCACCATG (YGUF)		TTTGTGGCCTCTGATGATTCAACG		GGCTTCCAAGTTGGGTGACAAGG		GATCCCCGGGAATTGCCATG (YGUR)
YER094C	PUP3	CGAATTCCAGCTGACCACCATG (YGUF)		CGGTAGCCAGACCGGTAATCCC		AAGTGAAAGAGGATGACAGCAAAAAGG		GATCCCCGGGAATTGCCATG (YGUR)
YFL039C	ACT1	CGAATTCCAGCTGACCACCATG (YGUF)		TTTTTTTTCCAAATTTCAAGCCCC		ACTGAAGCTTCTAAATTGGCTGCG		GATCCCCGGGAATTGCCATG (YGUR)
YGL055W	OLE1	CGAATTCCAGCTGACCACCATG (YGUF)		GAGCCCATTAAAGAACCAAAACCG		TATTGAAAGCACTGAAATCCCAGTCG		GATCCCCGGGAATTGCCATG (YGUR)
YGL225W	GOG5	CGAATTCCAGCTGACCACCATG (YGUF)		GCACGAAAAGCATGACAAAGTTCA		GCTGCTGGCTGTAAAATCGTTGG		GATCCCCGGGAATTGCCATG (YGUR)
YGL253W	HXK2	CGAATTCCAGCTGACCACCATG (YGUF)		CCCTTCTTGGACAAACCCTTTTCC		TCCGGTAAGGATGCATTTGAACATC		GATCCCCGGGAATTGCCATG (YGUR)
YGR060W	ERG25	CGAATTCCAGCTGACCACCATG (YGUF)		ATTAGACCGGTGGCCAAAACATC		GATGACAATGCAGACGCCTTGAAG		GATCCCCGGGAATTGCCATG (YGUR)
YGR192C	TDH3	CGAATTCCAGCTGACCACCATG (YGUF)		CATCGTGGGAAACTTCACCAGC		GAAGGTCAGAAACGGGCAAATGC		GATCCCCGGGAATTGCCATG (YGUR)
YGR214W	RPS0A	CGAATTCCAGCTGACCACCATG (YGUF)		GTTGGCGGGAAACCTGGTTG		CCTTGTTGCCAACTTTCGGTGC		GATCCCCGGGAATTGCCATG (YGUR)
YGR279C	YGR279C	CGAATTCCAGCTGACCACCATG (YGUF)		AGCAGCAACTGGAGTTGAAGCG		TTCGGTGGTCAAACCAAGCCTG		GATCCCCGGGAATTGCCATG (YGUR)
YGR282C	BGL2	CGAATTCCAGCTGACCACCATG (YGUF)		GCAGCGTAAACTTTGACGGTGG		GGTATTCCACGCTGTGTTGTCGG		GATCCCCGGGAATTGCCATG (YGUR)
YGR285C	ZUO1	CGAATTCCAGCTGACCACCATG (YGUF)		TCTTTCAAATTCAGACCAGGTGTGG		GGTTGCTAACGTCAAGGCCATCG		GATCCCCGGGAATTGCCATG (YGUR)
YHR007C	ERG11	CGAATTCCAGCTGACCACCATG (YGUF)		GAGGTGGACGGTCCTTTCTCAAAG		TGGAGGTGCTGGAGGCATGG		GATCCCCGGGAATTGCCATG (YGUR)
YHR039C	VMA10	CGAATTCCAGCTGACCACCATG (YGUF)		GGCAATTCCGTTTTTTTGGGAC		AAGAATGCCGGTGGTGTTGGTG		GATCCCCGGGAATTGCCATG (YGUR)
YHR094C	HXT1	CGAATTCCAGCTGACCACCATG (YGUF)		TTTTCCGGTGTTTGGAGGGG		AATGATGATGACCTCCGGTCAAGC		GATCCCCGGGAATTGCCATG (YGUR)
YHR179W	OYE2	CGAATTCCAGCTGACCACCATG (YGUF)		TGAGCGTAGTATTCAACGGCCC		CGTAGGCTGGAACTCTACCGTTGG		GATCCCCGGGAATTGCCATG (YGUR)
YIL043C	CBR1	CGAATTCCAGCTGACCACCATG (YGUF)		TGAAGAGCAAAGGCACGACCAC		GATGTAGACAAGCTCAAGCCGCTG		GATCCCCGGGAATTGCCATG (YGUR)
YIL053W	GPP1	CGAATTCCAGCTGACCACCATG (YGUF)		CTCTCCAGAAAGCAGCAATGGC		TTTGCCTGATGCATCTTCCCAAG		GATCCCCGGGAATTGCCATG (YGUR)
YIL133C	RPL16A	CGAATTCCAGCTGACCACCATG (YGUF)		CTGTATTCCACCCTTCTGCGGC		CTGAATCCGATTCTGATGATGAAGAGG		GATCCCCGGGAATTGCCATG (YGUR)
YJL034W	KAR2	CGAATTCCAGCTGACCACCATG (YGUF)		CCATTTTTCATCACAGCAACACAGG		TGGGTTACACTGAAGACGCTGTTGTC		GATCCCCGGGAATTGCCATG (YGUR)
YJR009C	TDH2	CGAATTCCAGCTGACCACCATG (YGUF)		CATCGTGGGAAACTTCACCAGC		TTTGAAACCGCCATTGCTGAAGAC		GATCCCCGGGAATTGCCATG (YGUR)
YJR104C	SOD1	CGAATTCCAGCTGACCACCATG (YGUF)		CACAACCATTGGTGGCATCTCC		CCAAAGGCCGAATGGGGTAGTG		GATCCCCGGGAATTGCCATG (YGUR)
YKL117W	SBA1	CGAATTCCAGCTGACCACCATG (YGUF)		TGATGGACATTTTCATCGCCAAC		TGATATGTACGCCGAAGGTGTTCTACC		GATCCCCGGGAATTGCCATG (YGUR)
YKL152C	GPM1	CGAATTCCAGCTGACCACCATG (YGUF)		TTGGAAGTGTACAAGACGTCTGGG		ACTTCGGTGACAGAAACAACAACAGC		GATCCCCGGGAATTGCCATG (YGUR)
YKL164C	PIR1	CGAATTCCAGCTGACCACCATG (YGUF)		CCTTGGAGGAAGCAGTAGTGGC		GTAGCCGTGGTTTTGGTGGTCG		GATCCCCGGGAATTGCCATG (YGUR)
YKL180W	RPL17A	CGAATTCCAGCTGACCACCATG (YGUF)		TGGTGGTCCAAAACTTGTTCCAAG		CGGTGAACACTTTGCTTACTGTCAGC		GATCCCCGGGAATTGCCATG (YGUR)
YKL216W	URA1	CGAATTCCAGCTGACCACCATG (YGUF)		CGTGGTTCAGGGTTACCTTCTCTTT		GCTGCTGCCACTGCTACCGG		GATCCCCGGGAATTGCCATG (YGUR)
YKR059W	TIF1	CGAATTCCAGCTGACCACCATG (YGUF)		TAGGCATGATGGCACGTTGTTG		CCGTGTCTGGATCTGGTCTATCGG		GATCCCCGGGAATTGCCATG (YGUR)
YLL050C	COF1	CGAATTCCAGCTGACCACCATG (YGUF)		TGGCTTCTTATGAATTTTTTCCCCC		GCCAGTCGGTAGAAACGTTGACG		GATCCCCGGGAATTGCCATG (YGUR)
YLR056W	ERG3	CGAATTCCAGCTGACCACCATG (YGUF)		TCTTTGACGGCATTCTTGGAGTTC		GAAGGACTCAGCGCCACTCAAAC		GATCCCCGGGAATTGCCATG (YGUR)
YLR110C	YLR110C	CGAATTCCAGCTGACCACCATG (YGUF)		ACGTCATCGACGGTGACGGTAG		CCAAGCTCCAAAGCAAAGAAGAAGAA		GATCCCCGGGAATTGCCATG (YGUR)
YLR150W	MPT4	CGAATTCCAGCTGACCACCATG (YGUF)		AGCACCCTCGTTACCAGAAGGTC		TTTGGGTTACACCGAAGACGCTG		GATCCCCGGGAATTGCCATG (YGUR)
YLR175W	CBF5	CGAATTCCAGCTGACCACCATG (YGUF)		GACACCAGAGCTGATATATGATTTCAGG		CATCACCACCGTTCCATGCCC		GATCCCCGGGAATTGCCATG (YGUR)
YLR286C	CTS1	CGAATTCCAGCTGACCACCATG (YGUF)		GGGTTGGAAATTGGTTCAAGAAAGAT		TTCGGTATGTGTGAGTCCCTGTACG		GATCCCCGGGAATTGCCATG (YGUR)
YLR355C	ILV5	CGAATTCCAGCTGACCACCATG (YGUF)		GCCAGTCAGCTCTTTCGTAGACGG		TCATCAAGGAACACTTGCCCGC		GATCCCCGGGAATTGCCATG (YGUR)
YLR372W	SUR4	CGAATTCCAGCTGACCACCATG (YGUF)		TCGAATTGCTCAGCTGGATAGCC		CCACATGTTGGGGCAAATACGC		GATCCCCGGGAATTGCCATG (YGUR)
YML012W	ERV25	CGAATTCCAGCTGACCACCATG (YGUF)		TCCATCACCAACAGAACCATCTG		GCCTGCCCAAGATGTTCTGATTTC		GATCCCCGGGAATTGCCATG (YGUR)
YML028W	TSA1	CGAATTCCAGCTGACCACCATG (YGUF)		CAATGATTTCGGTTGGACAGACG		TGGTCCATCATGCCAGATTTGTACTT		GATCCCCGGGAATTGCCATG (YGUR)
YML106W	URA5	CGAATTCCAGCTGACCACCATG (YGUF)		GGCAATTGCATACGCAGTAGCC		AGGAAATCACCGCTTTGGCTCC		GATCCCCGGGAATTGCCATG (YGUR)
YMR116C	ASC1	CGAATTCCAGCTGACCACCATG (YGUF)		TGGACAATGTGACTGTGACCCTTG		TTTCAATCTTCTGCCATCGGTGC		GATCCCCGGGAATTGCCATG (YGUR)
YMR202W	ERG2	CGAATTCCAGCTGACCACCATG (YGUF)		CCTTCTGCTGCGTTGTGTTTGC		GCCAGGTGGTTCCTTTGCCC		GATCCCCGGGAATTGCCATG (YGUR)
YMR230W	RPS10B	CGAATTCCAGCTGACCACCATG (YGUF)		GCCGTACTTGTCCACAAAGATCTTTT		TTGGAAGAAGTCAACACCATGTGGG		GATCCCCGGGAATTGCCATG (YGUR)
YNL055C	POR1	CGAATTCCAGCTGACCACCATG (YGUF)		CAGTGGACCGTCTTTGACAGGC		CCACCACGATTGACGAACAAGTTG		GATCCCCGGGAATTGCCATG (YGUR)
YNL160W	YGP1	CGAATTCCAGCTGACCACCATG (YGUF)		TAGAGTTAGACCCATTCCAGGCCG		CCGTTGGTTGGAAATACGAAGATGTT		GATCCCCGGGAATTGCCATG (YGUR)
YNL162W	RPL42A	CGAATTCCAGCTGACCACCATG (YGUF)		TGCTGAACTTTTATTGCGCATCG		ATGCGGCTGGTAAATTGAACGG		GATCCCCGGGAATTGCCATG (YGUR)
YOL086C	ADH1	CGAATTCCAGCTGACCACCATG (YGUF)		CAGTCACCGTGCCAAGCGTG		TGCTGCTAGGGATAACAAGAAGACC		GATCCCCGGGAATTGCCATG (YGUR)
YOL120C	RPL18A	CGAATTCCAGCTGACCACCATG (YGUF)		ATTGGCGTTGGTTAAAACCCTTG		GCCTTCGGTGTTGCATTGGG		GATCCCCGGGAATTGCCATG (YGUR)
YOL139C	CDC33	CGAATTCCAGCTGACCACCATG (YGUF)		TTTATCGACGGCTGGCTTTGTG		GCAAGATTTGCCAGAAGCCATG		GATCCCCGGGAATTGCCATG (YGUR)
YOR310C	NOP5	CGAATTCCAGCTGACCACCATG (YGUF)		ACCTTCAATAATGGAGTTGGCTTCC		TCAGGCTGCTGCTGCTTATGGG		GATCCCCGGGAATTGCCATG (YGUR)
YPR035W	GLN1	CGAATTCCAGCTGACCACCATG (YGUF)		ACCGTCGAAGTTCCATTCTGGC		TTCTGCTGCTCCAAGCTCCACTG		GATCCCCGGGAATTGCCATG (YGUR)
YPR062W	FCY1	CGAATTCCAGCTGACCACCATG (YGUF)		GTGGCGGATCCCTTTTGAAATC		GAGGTTTGGTTAAGCACTTGGAAGG		GATCCCCGGGAATTGCCATG (YGUR)
YPR080W	TEF1	CGAATTCCAGCTGACCACCATG (YGUF)		TTGTCCAAAACCCAAGCGTACTTG		ATGCTGAATTGCGTCGTTATGAAGC		GATCCCCGGGAATTGCCATG (YGUR)
YPR145W	ASN1	CGAATTCCAGCTGACCACCATG (YGUF)		AATTGGTTGAGCACCGGATTCC		GGCCAAGGGCTCCTTCAAGG		GATCCCCGGGAATTGCCATG (YGUR)
YPR149W	NCE102	CGAATTCCAGCTGACCACCATG (YGUF)		CAATGAAGTTGGCAAAGACACCG		GGGCACTACCACCAAAGAAACAGG		GATCCCCGGGAATTGCCATG (YGUR)
